# Supplementary material
Source: publisher site journal article supplement (https://www.spandidos-publications.com/7757/downloadSupplementary)
Supplement: Supplementary file 1 [file downloadSupplementary]

## Sheet: Table SIII
Table SIII. RNA-sequencing data from the peripheral blood mononuclear cells of patients with recurrent genital herpes.
gene_id	gene_name	EntrezID	transcript_id	GO	KEGG	KO_ENTRY	EC	TF_Family	Description	trans_type	DO	Reactome	FPKM.Herpes_1	FPKM.Herpes_2	FPKM.Herpes_3	FPKM.Herpes_4	FPKM.Herpes_5	FPKM.Herpes_6	FPKM.Herpes_7	FPKM.Herpes_8	FPKM.Herpes_9	FPKM.Herpes_10	FPKM.Herpes_11	FPKM.Herpes_12	FPKM.Herpes_13	FPKM.Herpes_14	FPKM.Normal_10	FPKM.Normal_11	FPKM.Normal_12	FPKM.Normal_13	FPKM.Normal_14	FPKM.Normal_1	FPKM.Normal_2	FPKM.Normal_3	FPKM.Normal_4	FPKM.Normal_5	FPKM.Normal_6	FPKM.Normal_7	FPKM.Normal_8	FPKM.Normal_9	fc	log2(fc)	pval	qval	regulation	significant
ENSG00000136541	ERMN	57471	ENST00000410096;ENST00000409395;ENST00000419116;ENST00000409925;ENST00000397283;ENST00000411762	GO:0001763(morphogenesis of a branching structure);GO:0003779(actin binding);GO:0005515(protein binding);GO:0005737(cytoplasm);GO:0005856(cytoskeleton);GO:0005938(cell cortex);GO:0007015(actin filament organization);GO:0008360(regulation of cell shape);GO:0030175(filopodium);GO:0031344(regulation of cell projection organization);GO:0033269(internode region of axon);GO:0033270(paranode region of a…	NA	NA	NA	NA	ermin [Source:HGNC Symbol;Acc:HGNC:29208]	protein_coding;nonsense_mediated_decay	NA	NA	0.420672	0.358732	0.577607	0.368939	0.610746	0.905342	0.539114	0.790674	0.558708	0.505297	0.753431	0.837435	0.73121	1.0497	8.64162	2.50518	3.97391	4.44186	5.15146	3.19134	4.94157	2.10939	1.66906	1.27943	2.80649	6.43985	2.96264	6.85132	0.158125	-2.66086	1.35548e-87	5.44607e-83	down	yes
ENSG00000170915	PAQR8	85315	ENST00000442253;ENST00000512121;ENST00000360726	GO:0003707(nuclear steroid receptor activity);GO:0005496(steroid binding);GO:0005515(protein binding);GO:0005794(Golgi apparatus);GO:0005886(plasma membrane);GO:0008289(lipid binding);GO:0016020(membrane);GO:0016021(integral component of membrane);GO:0030154(cell differentiation);GO:0038023(signaling receptor activity);GO:0043401(steroid hormone mediated signaling pathway);GO:0048477(oogenesis);G…	NA	NA	NA	NA	progestin and adipoQ receptor family member 8 [Source:HGNC Symbol;Acc:HGNC:15708]	protein_coding	NA	NA	1.58899	1.73834	2.66048	2.03746	3.14777	2.65525	3.41004	4.41335	4.12644	2.69212	4.43501	2.48403	4.79169	5.00196	0.272067	0.275763	0.384585	0.575427	0.364851	0.149531	0.612351	0.144044	0.118419	0.048558	0.498779	0.318508	0.374632	0.305997	10.1683	3.34601	6.17344e-83	1.24018e-78	up	yes
ENSG00000105127	AKAP8	10270	ENST00000679798;ENST00000681812;ENST00000680336;ENST00000681018;ENST00000599883;ENST00000680245;ENST00000537303;ENST00000598597;ENST00000595416;ENST00000680199;ENST00000269701;ENST00000680461	GO:0000278(mitotic cell cycle);GO:0000793(condensed chromosome);GO:0001939(female pronucleus);GO:0002376(immune system process);GO:0003677(DNA binding);GO:0003690(double-stranded DNA binding);GO:0003723(RNA binding);GO:0005515(protein binding);GO:0005634(nucleus);GO:0005654(nucleoplasm);GO:0005730(nucleolus);GO:0005737(cytoplasm);GO:0005739(mitochondrion);GO:0005794(Golgi apparatus);GO:0007076(mi…	NA	NA	NA	NA	A-kinase anchoring protein 8 [Source:HGNC Symbol;Acc:HGNC:378]	retained_intron;nonsense_mediated_decay;processed_transcript;protein_coding	NA	NA	1.87642	1.49309	3.14538	2.05056	3.14997	4.07862	3.70705	4.63191	4.12682	3.21678	4.28883	3.72737	5.06724	4.93565	9.32769	5.64063	8.82482	10.5495	10.0576	5.55436	8.06655	4.63922	7.32967	1.50646	8.32657	10.5258	6.62465	11.2383	0.457397	-1.12848	1.97403e-81	2.64376e-77	down	yes
ENSG00000163154	TNFAIP8L2	79626	ENST00000368910	GO:0002376(immune system process);GO:0005515(protein binding);GO:0005737(cytoplasm);GO:0042110(T cell activation);GO:0042981(regulation of apoptotic process);GO:0045087(innate immune response);GO:0050728(negative regulation of inflammatory response);GO:0050868(negative regulation of T cell activation)	NA	NA	NA	NA	TNF alpha induced protein 8 like 2 [Source:HGNC Symbol;Acc:HGNC:26277]	protein_coding	NA	R-HSA-8874470(TNFAIP8 proteins transfer PI(4,5)P2, PI(3,4,5)P3 from cytosolic vesicles to plasma membrane)	22.1952	17.8168	27.3993	19.2587	28.744	23.7951	28.7223	33.3935	36.5619	22.142	40.1563	30.5354	46.1372	37.1644	6.29247	3.17393	4.9849	6.78769	4.45187	2.51593	4.99997	3.71549	2.96278	2.26043	5.83455	3.42665	6.62993	7.07769	6.35839	2.66866	6.37005e-81	6.39839e-77	up	yes
ENSG00000175538	KCNE3	10008	ENST00000310128;ENST00000525550;ENST00000531854;ENST00000529425;ENST00000532569;ENST00000526855	GO:0005244(voltage-gated ion channel activity);GO:0005249(voltage-gated potassium channel activity);GO:0005251(delayed rectifier potassium channel activity);GO:0005267(potassium channel activity);GO:0005515(protein binding);GO:0005737(cytoplasm);GO:0005886(plasma membrane);GO:0006811(ion transport);GO:0006813(potassium ion transport);GO:0006814(sodium ion transport);GO:0008076(voltage-gated potas…	04974(Protein digestion and absorption);04974(Protein digestion and absorption)	NA	NA	NA	potassium voltage-gated channel subfamily E regulatory subunit 3 [Source:HGNC Symbol;Acc:HGNC:6243]	protein_coding	NA	R-HSA-5577050(AKAP9:KCNQ1 tetramer:KCNE dimer transports K+ from cytosol to extracellular region);R-HSA-5577237(KCNH2:KCNE transport K+ from cytosol to extracellular region);R-HSA-9613264(Class III antiarrhythmics bind KCNH2 in KCNH2:KCNE)	12.772	8.82784	13.7604	8.29014	16.3873	10.7471	12.4777	15.8134	16.0564	8.14798	18.8335	11.3208	19.3874	17.1701	1.99242	0.956408	2.39741	3.49381	2.01306	1.0761	2.20585	1.0852	1.24556	0.646782	3.14456	2.00553	2.44746	3.34379	6.77239	2.75966	8.42128e-79	6.767e-75	up	yes
ENSG00000156232	WHAMM	123720	ENST00000286760;ENST00000560964	GO:0000139(Golgi membrane);GO:0003779(actin binding);GO:0005737(cytoplasm);GO:0005793(endoplasmic reticulum-Golgi intermediate compartment);GO:0005794(Golgi apparatus);GO:0005829(cytosol);GO:0005874(microtubule);GO:0006888(endoplasmic reticulum to Golgi vesicle-mediated transport);GO:0007015(actin filament organization);GO:0008017(microtubule binding);GO:0016020(membrane);GO:0030032(lamellipodium…	04530(Tight junction);04530(Tight junction)	NA	NA	NA	WASP homolog associated with actin, golgi membranes and microtubules [Source:HGNC Symbol;Acc:HGNC:30493]	protein_coding;retained_intron	NA	R-HSA-9693250(RHOD binds effectors at the Golgi membrane)	1.42267	1.41545	2.50321	1.16333	2.41995	3.03895	2.32027	3.36984	3.44166	2.12075	4.05483	2.55655	4.42975	3.69459	8.35696	5.08673	9.18422	7.41608	8.47076	4.90594	5.66957	3.98974	5.60055	1.76473	6.38948	7.76894	5.34703	8.49885	0.429078	-1.22069	5.86264e-74	3.92582e-70	down	yes
ENSG00000136485	DCAF7	10238	ENST00000614556;ENST00000688721;ENST00000686337;ENST00000431926;ENST00000691458;ENST00000690481;ENST00000582274;ENST00000693226;ENST00000693510;ENST00000690417;ENST00000692877;ENST00000688888;ENST00000688972;ENST00000615512;ENST00000686787;ENST00000691063	GO:0005515(protein binding);GO:0005634(nucleus);GO:0005654(nucleoplasm);GO:0005737(cytoplasm);GO:0005829(cytosol);GO:0016363(nuclear matrix);GO:0016567(protein ubiquitination);GO:0016604(nuclear body);GO:0030674(protein-macromolecule adaptor activity);GO:0032991(protein-containing complex);GO:0080008(Cul4-RING E3 ubiquitin ligase complex);GO:0080008(Cul4-RING E3 ubiquitin ligase complex)	NA	NA	NA	NA	DDB1 and CUL4 associated factor 7 [Source:HGNC Symbol;Acc:HGNC:30915]	protein_coding;retained_intron;nonsense_mediated_decay	NA	R-HSA-390470(Association of CCT/TriC with other substrates during biosynthesis (unknown chaperone));R-HSA-8952638(AcM-UBE2M transfers NEDD8 to CRL4 E3 ubiquitin ligase complex);R-HSA-8952639(NEDD8:AcM-UBE2M binds CRL4 E3 ubiquitin ligase complex);R-HSA-8955245(CAND1 binds CRL4 E3 ubiquitin ligase in the nucleus);R-HSA-8955285(COMMDs displace CAND1 from CRL4 E3 ubiquitin ligase complex);R-HSA-8956…	3.7528	3.70925	5.31018	4.11917	6.32103	6.47817	5.53435	5.87119	8.29975	7.27073	12.2479	6.90125	9.54885	9.21068	2.3325	1.16422	2.0001	2.43671	2.5902	1.09723	2.11417	1.01434	1.15696	0.471314	1.77027	2.10821	1.99293	2.52062	3.81818	1.93288	1.08164e-69	6.20828e-66	up	yes
ENSG00000088986	DYNLL1	8655	ENST00000242577;ENST00000550845;ENST00000392508;ENST00000552316;ENST00000549989;ENST00000548214;ENST00000550178;ENST00000548342;ENST00000549649;ENST00000392509	GO:0000776(kinetochore);GO:0005515(protein binding);GO:0005634(nucleus);GO:0005737(cytoplasm);GO:0005739(mitochondrion);GO:0005813(centrosome);GO:0005815(microtubule organizing center);GO:0005829(cytosol);GO:0005856(cytoskeleton);GO:0005868(cytoplasmic dynein complex);GO:0005874(microtubule);GO:0005875(microtubule associated complex);GO:0005886(plasma membrane);GO:0005929(cilium);GO:0006915(apopt…	04962(Vasopressin-regulated water reabsorption);05132(Salmonella infection);05132(Salmonella infection)	NA	NA	NA	dynein light chain LC8-type 1 [Source:HGNC Symbol;Acc:HGNC:15476]	protein_coding;processed_transcript	DOID:14566(disease_of_cellular_proliferation);DOID:162(cancer);DOID:4(disease)	R-HSA-139918(Phosphorylation of BIM by JNK);R-HSA-141409(Mad1 binds kinetochore);R-HSA-141422(MAD2 converted to an inhibitory state via interaction with Mad1);R-HSA-141431(MAD2 associates with the Mad1 kinetochore complex);R-HSA-141439(Release of activated MAD2 from kinetochores);R-HSA-1632843(AMBRA1 binds DYNLL1,DYNLL2);R-HSA-1632857(ULK1 phosphorylates AMBRA1:BECN1 complex);R-HSA-1638803(Phosph…	6.80876	5.37932	8.67463	7.75734	9.95517	10.0848	8.85107	11.7838	12.0909	14.2949	11.4256	11.9026	17.1436	13.4781	2.90581	2.51796	3.97409	3.20441	4.08845	1.88204	2.93241	1.55905	2.65653	1.21536	3.59552	3.27892	3.48099	3.14571	3.70032	1.88765	7.28208e-69	3.65724e-65	up	yes
ENSG00000131381	RBSN	64145	ENST00000253699;ENST00000426541;ENST00000441057;ENST00000463214;ENST00000476527;ENST00000449050;ENST00000483098;ENST00000507357;ENST00000449964	GO:0005515(protein binding);GO:0005768(endosome);GO:0005829(cytosol);GO:0005886(plasma membrane);GO:0008270(zinc ion binding);GO:0010008(endosome membrane);GO:0015031(protein transport);GO:0016020(membrane);GO:0016197(endosomal transport);GO:0031267(small GTPase binding);GO:0031901(early endosome membrane);GO:0034498(early endosome to Golgi transport);GO:0043231(intracellular membrane-bounded org…	04144(Endocytosis);04144(Endocytosis)	NA	NA	NA	rabenosyn, RAB effector [Source:HGNC Symbol;Acc:HGNC:20759]	protein_coding;nonsense_mediated_decay;retained_intron;processed_transcript	NA	R-HSA-1011576(EHD proteins interact with Rabenosyn-5);R-HSA-1011600(Rabenosyn-5 connects Rab5 to VPS-45);R-HSA-188002(Rab5-mediated recruitment of class III PI3K to TLR9)	1.3547	1.12139	1.87691	1.24713	1.86037	2.22379	2.16783	2.40681	2.3847	2.06988	2.60537	2.02062	3.31523	3.43661	4.0213	2.97995	4.48226	5.16149	4.95675	2.38193	3.50754	1.94541	2.37479	0.869671	3.98464	4.8893	3.32172	4.75057	0.606346	-0.721786	2.38435e-68	1.06443e-64	down	no
ENSG00000155252	PI4K2A	55361	ENST00000370631	GO:0000139(Golgi membrane);GO:0000166(nucleotide binding);GO:0000287(magnesium ion binding);GO:0004430(1-phosphatidylinositol 4-kinase activity);GO:0005515(protein binding);GO:0005524(ATP binding);GO:0005739(mitochondrion);GO:0005765(lysosomal membrane);GO:0005768(endosome);GO:0005794(Golgi apparatus);GO:0005802(trans-Golgi network);GO:0005829(cytosol);GO:0005886(plasma membrane);GO:0005887(integ…	00562(Inositol phosphate metabolism);01100(Metabolic pathways);04070(Phosphatidylinositol signaling system)	K13711	EC:2.7.1.67	NA	phosphatidylinositol 4-kinase type 2 alpha [Source:HGNC Symbol;Acc:HGNC:30031]	protein_coding	DOID:331(central_nervous_system_disease);DOID:4(disease);DOID:607(paraplegia);DOID:7(disease_of_anatomical_entity);DOID:863(nervous_system_disease)	R-HSA-1675780(PI is phosphorylated to PI4P by PI4K2A/B at the plasma membrane);R-HSA-1675974(PI is phosphorylated to PI4P by PI4K2A/B at the early endosome membrane);R-HSA-1676185(PI is phosphorylated to PI4P by PI4KA/2A/2B at the Golgi membrane)	2.97666	2.25096	2.92857	2.82474	3.58076	4.642	3.61158	4.87843	4.9566	5.04436	6.09703	5.51843	6.96547	6.20886	10.8054	6.97327	11.6555	12.0623	11.7525	6.78498	9.24808	7.30274	10.9573	2.68032	10.3055	11.2141	12.0211	15.198	0.449655	-1.15311	6.39558e-66	2.56961e-62	down	yes
ENSG00000116237	ICMT	23463	ENST00000343813;ENST00000474756;ENST00000489498	GO:0003880(protein C-terminal carboxyl O-methyltransferase activity);GO:0004671(protein C-terminal S-isoprenylcysteine carboxyl O-methyltransferase activity);GO:0005515(protein binding);GO:0005783(endoplasmic reticulum);GO:0005789(endoplasmic reticulum membrane);GO:0006481(C-terminal protein methylation);GO:0006612(protein targeting to membrane);GO:0008168(methyltransferase activity);GO:0016020(m…	00900(Terpenoid backbone biosynthesis);00900(Terpenoid backbone biosynthesis)	K00587	EC:2.1.1.100	NA	isoprenylcysteine carboxyl methyltransferase [Source:HGNC Symbol;Acc:HGNC:5350]	protein_coding;nonsense_mediated_decay	DOID:0050686(organ_system_cancer);DOID:1192(peripheral_nervous_system_neoplasm);DOID:14566(disease_of_cellular_proliferation);DOID:162(cancer);DOID:2621(autonomic_nervous_system_neoplasm);DOID:3093(nervous_system_cancer);DOID:4(disease);DOID:769(neuroblastoma)	R-HSA-6788650(ICMT:Zn2+ transfers CH3 from AdoMet to isoprenylated proteins);R-HSA-9647977(ICMT methylates S-Farn RAS proteins);R-HSA-9656775(Cysmethynil binds ICMT:Zn2+)	3.63311	3.41182	4.43146	4.13662	5.50933	6.03859	4.83648	5.88234	6.37727	6.8227	6.66092	6.27938	9.07199	8.26349	1.66578	1.45259	2.24638	2.01812	2.04555	0.942587	1.45474	0.861773	1.33637	0.379351	2.44752	2.09428	2.22639	1.83704	3.53589	1.82207	9.54666e-66	3.48696e-62	up	yes
ENSG00000137955	RABGGTB	5876	ENST00000496055;ENST00000459697;ENST00000485459;ENST00000467748;ENST00000319942;ENST00000462042;ENST00000471759;ENST00000470201;ENST00000497648;ENST00000461653;ENST00000473406;ENST00000489450;ENST00000491266;ENST00000370826	GO:0003824(catalytic activity);GO:0004659(prenyltransferase activity);GO:0004663(Rab geranylgeranyltransferase activity);GO:0005515(protein binding);GO:0005829(cytosol);GO:0005886(plasma membrane);GO:0005968(Rab-protein geranylgeranyltransferase complex);GO:0007601(visual perception);GO:0008270(zinc ion binding);GO:0008318(protein prenyltransferase activity);GO:0016740(transferase activity);GO:00…	NA	K05956	EC:2.5.1.60	NA	Rab geranylgeranyltransferase subunit beta [Source:HGNC Symbol;Acc:HGNC:9796]	processed_transcript;protein_coding	NA	R-HSA-6801101(RABGGTA binds RABGGTB);R-HSA-6801109(CHM binds RGGT);R-HSA-8870457(FarC-PTP4A2 binds RABGGTB);R-HSA-8870461(RABGGTA and RABGGTB bind);R-HSA-8870465(RGGT binds the RAB-binding subunit);R-HSA-8870466(RGGT:CHM binds RABs);R-HSA-8870469(RGGT geranylgeranylates RAB proteins)	1.53876	1.3863	2.41841	1.60475	2.46834	3.81391	2.99777	4.31249	4.20257	3.37897	2.53298	3.28227	3.89441	3.98642	9.59052	5.69753	8.1728	8.03549	8.95929	5.41195	6.17449	3.4273	5.58121	1.57291	6.53792	8.7803	6.3395	9.35997	0.446581	-1.16301	1.38112e-64	4.51207e-61	down	yes
ENSG00000184545	DUSP8	1850	ENST00000397374;ENST00000528778;ENST00000331588	GO:0004721(phosphoprotein phosphatase activity);GO:0004722(protein serine/threonine phosphatase activity);GO:0004725(protein tyrosine phosphatase activity);GO:0005634(nucleus);GO:0005737(cytoplasm);GO:0005829(cytosol);GO:0006470(protein dephosphorylation);GO:0008138(protein tyrosine/serine/threonine phosphatase activity);GO:0008330(protein tyrosine/threonine phosphatase activity);GO:0016311(depho…	04010(MAPK signaling pathway);04010(MAPK signaling pathway)	K04459	EC:3.1.3.16;EC:3.1.3.48	NA	dual specificity phosphatase 8 [Source:HGNC Symbol;Acc:HGNC:3074]	protein_coding;processed_transcript	NA	R-HSA-5675373(Nuclear DUSPs dephosphorylate MAPKs);R-HSA-5675376(Cytosolic DUSPs dephosphorylate MAPKs);R-HSA-9652816(Constitutively active MAPK1 mutants are not dephosphorylated by DUSPs)	0.328401	0.232197	0.416326	0.350215	0.553446	0.663571	0.607526	0.440282	0.548986	0.491601	1.66827	0.543014	0.764814	0.446676	4.80307	4.68621	3.49298	3.66977	5.94137	3.55965	2.43953	2.68816	5.50898	1.53887	3.69544	4.47244	3.25068	5.48763	0.145838	-2.77756	1.45993e-64	4.51207e-61	down	yes
ENSG00000101544	ADNP2	22850	ENST00000262198;ENST00000560752;ENST00000561195;ENST00000560561	GO:0000785(chromatin);GO:0000981(DNA-binding transcription factor activity, RNA polymerase II-specific);GO:0003674(molecular_function);GO:0003677(DNA binding);GO:0005515(protein binding);GO:0005575(cellular_component);GO:0005634(nucleus);GO:0006357(regulation of transcription by RNA polymerase II);GO:0010468(regulation of gene expression);GO:0030182(neuron differentiation);GO:0030307(positive reg…	NA	NA	NA	Others	ADNP homeobox 2 [Source:HGNC Symbol;Acc:HGNC:23803]	protein_coding	DOID:150(disease_of_mental_health);DOID:1561(cognitive_disorder);DOID:2468(psychotic_disorder);DOID:4(disease);DOID:5419(schizophrenia)	NA	1.26638	1.00588	1.65844	1.39062	1.87517	2.77937	2.02024	2.47754	2.70483	1.97131	3.15119	2.6168	3.39743	3.39581	7.20631	3.90587	6.03476	6.61326	7.25722	3.62267	5.82524	2.76588	3.06663	1.12939	4.93516	7.81692	4.43459	7.54753	0.439445	-1.18624	3.56073e-63	9.68635e-60	down	yes
ENSG00000116133	DHCR24	1718	ENST00000371269;ENST00000647912;ENST00000535035;ENST00000648712;ENST00000649769;ENST00000648182;ENST00000648641;ENST00000650362;ENST00000648494;ENST00000436604	GO:0000139(Golgi membrane);GO:0000246(delta24(24-1) sterol reductase activity);GO:0005515(protein binding);GO:0005634(nucleus);GO:0005737(cytoplasm);GO:0005783(endoplasmic reticulum);GO:0005789(endoplasmic reticulum membrane);GO:0005794(Golgi apparatus);GO:0005829(cytosol);GO:0005856(cytoskeleton);GO:0006629(lipid metabolic process);GO:0006694(steroid biosynthetic process);GO:0006695(cholesterol …	00100(Steroid biosynthesis);01100(Metabolic pathways);01100(Metabolic pathways)	K09828	EC:1.3.1.72	NA	24-dehydrocholesterol reductase [Source:HGNC Symbol;Acc:HGNC:2859]	protein_coding;nonsense_mediated_decay;processed_transcript	DOID:0050686(organ_system_cancer);DOID:0050687(cell_type_cancer);DOID:10652(Alzheimer's_disease);DOID:1192(peripheral_nervous_system_neoplasm);DOID:1289(neurodegenerative_disease);DOID:1307(dementia);DOID:14566(disease_of_cellular_proliferation);DOID:150(disease_of_mental_health);DOID:1561(cognitive_disorder);DOID:162(cancer);DOID:170(endocrine_gland_cancer);DOID:1909(melanoma);DOID:2621(autonomi…	R-HSA-196417(Reduction of desmosterol to cholesterol);R-HSA-6807064(DHCR24 reduces ZYMOL to ZYMSTNL);R-HSA-9755937(DHCR24 reduces LAN to 24,25-dhLAN)	4.26717	3.88209	3.39728	4.63899	4.72693	4.06342	3.70369	4.24415	5.77779	6.1004	3.55519	5.79018	6.5204	6.74862	0.849188	0.759134	0.959825	0.955427	0.801011	0.3169	0.60299	0.174224	0.544742	0.313458	0.653389	0.698475	0.75942	0.976614	7.19891	2.84778	3.61629e-63	9.68635e-60	up	yes
ENSG00000161835	TAMALIN	160622	ENST00000550809;ENST00000552508;ENST00000293662;ENST00000548505;ENST00000552049;ENST00000552963;ENST00000547749	GO:0005515(protein binding);GO:0005737(cytoplasm);GO:0005886(plasma membrane);GO:0007165(signal transduction);GO:0008104(protein localization);GO:0014069(postsynaptic density);GO:0016020(membrane);GO:0030054(cell junction);GO:0030165(PDZ domain binding);GO:0031267(small GTPase binding);GO:0042802(identical protein binding);GO:0045202(synapse);GO:0045211(postsynaptic membrane);GO:0048471(perinucle…	NA	NA	NA	NA	trafficking regulator and scaffold protein tamalin [Source:HGNC Symbol;Acc:HGNC:18707]	retained_intron;protein_coding;processed_transcript	NA	NA	0.792088	0.677613	0.742095	0.9241	0.530257	2.65727	1.19159	1.58006	0.647319	1.26896	0.794345	1.14478	0.717052	0.859053	17.0456	15.1202	8.95401	9.31304	22.6439	18.6136	16.5379	8.73	36.9425	6.10865	8.52765	16.6067	10.218	15.3246	0.0689489	-3.85833	9.41357e-62	2.36386e-58	down	yes
ENSG00000125863	MKKS	8195	ENST00000347364;ENST00000651692;ENST00000399054	GO:0000166(nucleotide binding);GO:0001947(heart looping);GO:0005515(protein binding);GO:0005524(ATP binding);GO:0005634(nucleus);GO:0005737(cytoplasm);GO:0005813(centrosome);GO:0005815(microtubule organizing center);GO:0005829(cytosol);GO:0005856(cytoskeleton);GO:0006457(protein folding);GO:0007286(spermatid development);GO:0007368(determination of left/right symmetry);GO:0007507(heart developmen…	NA	NA	NA	NA	MKKS centrosomal shuttling protein [Source:HGNC Symbol;Acc:HGNC:7108]	protein_coding	DOID:0014667(disease_of_metabolism);DOID:0050177(monogenic_disease);DOID:0050737(autosomal_recessive_disease);DOID:0050739(autosomal_genetic_disease);DOID:0060158(acquired_metabolic_disease);DOID:1935(Bardet_Biedl_syndrome);DOID:225(syndrome);DOID:374(nutrition_disease);DOID:4(disease);DOID:630(genetic_disease);DOID:654(overnutrition);DOID:9970(obesity)	R-HSA-5624125(Formation of the BBSome)	1.02444	0.546224	1.40535	1.03162	1.45165	1.6997	1.06898	2.24218	1.80872	1.29292	1.78785	1.46247	2.77727	2.49664	0.482536	0.30062	0.3574	0.521261	0.363673	0.217321	0.469442	0.137592	0.309712	0.0562545	0.298954	0.425691	0.362043	0.455666	4.64381	2.21531	1.24178e-61	2.93484e-58	up	yes
ENSG00000274986	MIR6750	102466192	ENST00000617817	NA	NA	NA	NA	NA	microRNA 6750 [Source:HGNC Symbol;Acc:HGNC:49965]	miRNA	NA	NA	1.43191	0.104508	0.862774	0.424562	0.61276	1.50355	1.18089	1.23609	0.487704	0.373175	0.14919	0.332153	0.792116	0.231094	13.6132	16.2531	17.2067	19.818	17.0084	20.5459	10.4756	11.7651	17.6591	4.95542	18.3356	31.0071	8.07475	23.3129	0.042266	-4.56436	1.14238e-59	2.54992e-56	down	yes
ENSG00000179941	BBS10	79738	ENST00000650064	GO:0000166(nucleotide binding);GO:0005515(protein binding);GO:0005524(ATP binding);GO:0005929(cilium);GO:0007601(visual perception);GO:0042995(cell projection);GO:0043254(regulation of protein-containing complex assembly);GO:0045494(photoreceptor cell maintenance);GO:0050896(response to stimulus);GO:0051131(chaperone-mediated protein complex assembly);GO:0061629(RNA polymerase II-specific DNA-bin…	NA	NA	NA	NA	Bardet-Biedl syndrome 10 [Source:HGNC Symbol;Acc:HGNC:26291]	protein_coding	DOID:0050177(monogenic_disease);DOID:0050737(autosomal_recessive_disease);DOID:0050739(autosomal_genetic_disease);DOID:1935(Bardet_Biedl_syndrome);DOID:225(syndrome);DOID:4(disease);DOID:630(genetic_disease)	R-HSA-5624125(Formation of the BBSome)	1.15132	0.992259	1.59896	1.19071	1.94793	1.60689	1.30436	2.49677	1.86263	1.65742	1.63761	2.26138	4.22811	3.64908	0.409846	0.27033	0.251371	0.353127	0.379879	0.193572	0.37128	0.105694	0.103268	0.03335	0.33265	0.277741	0.255156	0.53476	7.12429	2.83275	1.48341e-59	3.13687e-56	up	yes
ENSG00000196678	ERI2	112479	ENST00000357967;ENST00000565884;ENST00000563117;ENST00000562215;ENST00000564349;ENST00000566223;ENST00000569729;ENST00000562987;ENST00000567562;ENST00000567859;ENST00000562277;ENST00000300005;ENST00000568805;ENST00000568251;ENST00000563537	GO:0000175(3'-5'-exoribonuclease activity);GO:0000467(exonucleolytic trimming to generate mature 3'-end of 5.8S rRNA from tricistronic rRNA transcript (SSU-rRNA, 5.8S rRNA, LSU-rRNA));GO:0003676(nucleic acid binding);GO:0004518(nuclease activity);GO:0004527(exonuclease activity);GO:0008270(zinc ion binding);GO:0016787(hydrolase activity);GO:0046872(metal ion binding);GO:0046872(metal ion binding)	NA	NA	NA	NA	ERI1 exoribonuclease family member 2 [Source:HGNC Symbol;Acc:HGNC:30541]	protein_coding;processed_transcript;retained_intron;nonsense_mediated_decay	NA	NA	0.227162	0.146027	0.343621	0.277631	0.356717	0.45811	0.391166	0.416759	0.496121	0.448589	0.344729	0.290331	0.599994	0.776188	0.107699	0.0330556	0.0788451	0.0931969	0.0569218	0.0326903	0.0517741	0.0125735	0.0165333	0.0175781	0.0664338	0.0624597	0.0417282	0.0729441	7.48642	2.90428	4.36683e-58	8.77253e-55	up	yes
ENSG00000070010	UFD1	7353	ENST00000459854;ENST00000263202;ENST00000466373;ENST00000474226;ENST00000489406;ENST00000447868;ENST00000399523;ENST00000421968;ENST00000494054;ENST00000484101	GO:0001501(skeletal system development);GO:0004843(cysteine-type deubiquitinase activity);GO:0005515(protein binding);GO:0005634(nucleus);GO:0005654(nucleoplasm);GO:0005737(cytoplasm);GO:0005829(cytosol);GO:0006511(ubiquitin-dependent protein catabolic process);GO:0030433(ubiquitin-dependent ERAD pathway);GO:0030970(retrograde protein transport, ER to cytosol);GO:0031593(polyubiquitin modificatio…	04141(Protein processing in endoplasmic reticulum);04141(Protein processing in endoplasmic reticulum)	NA	NA	NA	ubiquitin recognition factor in ER associated degradation 1 [Source:HGNC Symbol;Acc:HGNC:12520]	retained_intron;protein_coding;processed_transcript	DOID:150(disease_of_mental_health);DOID:1561(cognitive_disorder);DOID:2468(psychotic_disorder);DOID:4(disease);DOID:5419(schizophrenia)	R-HSA-5654985(SPRTN recruits VCP to monoUb:K164-PCNA associated with POLH);R-HSA-5654989(SPRTN:VCP-mediated release of POLH from monoUb:K164-PCNA);R-HSA-6781922(USP13 binds UFD1L:SKP2);R-HSA-9755507(UBXN7:UBF1:NPLOC4:VCP hexamer binds NFE2L2:CRL3 complex);R-HSA-9758088(UBXN7 binds VCP hexamer:UBF1:NPLOC4);R-HSA-9758090(Ubiquitinated NFE2L2 is extracted from CRL3 complex for degradation)	2.1914	1.63826	2.57143	1.84744	2.59467	3.99354	3.36639	4.8136	3.56321	3.95726	2.92767	3.64616	4.84031	4.39746	7.45806	4.37787	7.51955	8.04611	7.23891	4.83658	5.76762	3.23478	5.57336	1.55671	5.96259	7.31617	4.83098	8.99297	0.560362	-0.835569	1.29112e-56	2.47022e-53	down	no
ENSG00000198742	SMURF1	57154	ENST00000361125;ENST00000480055;ENST00000361368;ENST00000472627	GO:0000209(protein polyubiquitination);GO:0004842(ubiquitin-protein transferase activity);GO:0005515(protein binding);GO:0005543(phospholipid binding);GO:0005654(nucleoplasm);GO:0005737(cytoplasm);GO:0005739(mitochondrion);GO:0005829(cytosol);GO:0005886(plasma membrane);GO:0006511(ubiquitin-dependent protein catabolic process);GO:0006611(protein export from nucleus);GO:0007398(ectoderm developmen…	04120(Ubiquitin mediated proteolysis);04144(Endocytosis);04340(Hedgehog signaling pathway);04350(TGF-beta signaling pathway);04350(TGF-beta signaling pathway)	K04678	EC:2.3.2.26	NA	SMAD specific E3 ubiquitin protein ligase 1 [Source:HGNC Symbol;Acc:HGNC:16807]	protein_coding;processed_transcript	DOID:0050686(organ_system_cancer);DOID:0060056(hypersensitivity_reaction_disease);DOID:14566(disease_of_cellular_proliferation);DOID:1575(rheumatic_disease);DOID:162(cancer);DOID:170(endocrine_gland_cancer);DOID:1793(pancreatic_cancer);DOID:17(musculoskeletal_system_disease);DOID:2914(immune_system_disease);DOID:417(hypersensitivity_reaction_type_II_disease);DOID:418(systemic_scleroderma);DOID:41…	R-HSA-178215(SMAD7:SMURF1 complex is exported to the cytosol);R-HSA-178218(SMAD7:SMURF complex binds to phosphorylated TGFBR1);R-HSA-201445(Ubiquitin-dependent degradation controls basal levels of R-Smad1/5/8);R-HSA-201821(I-Smad binds to type I receptor, preventing Smad1/5/8 from being activated);R-HSA-2160931(Disassembly of tight junctions);R-HSA-2160932(SMURF1 binds phosphorylated PARD6A);R-HS…	2.49037	2.20272	2.75799	2.06891	3.39226	3.41327	2.74615	3.4882	3.86037	3.28207	4.19062	3.52928	4.69471	3.97762	11.1428	4.41949	8.02151	8.83568	8.74694	4.58909	8.56511	4.91336	5.20218	1.91293	6.01959	8.48131	7.48817	12.2208	0.458383	-1.12537	1.56188e-56	2.85242e-53	down	yes
ENSG00000173614	NMNAT1	64802	ENST00000377205;ENST00000496751;ENST00000403197;ENST00000462686;ENST00000492735	GO:0000166(nucleotide binding);GO:0000309(nicotinamide-nucleotide adenylyltransferase activity);GO:0003824(catalytic activity);GO:0004515(nicotinate-nucleotide adenylyltransferase activity);GO:0005515(protein binding);GO:0005524(ATP binding);GO:0005634(nucleus);GO:0005654(nucleoplasm);GO:0009058(biosynthetic process);GO:0009165(nucleotide biosynthetic process);GO:0009435(NAD biosynthetic process)…	00760(Nicotinate and nicotinamide metabolism);01100(Metabolic pathways);01240(Biosynthesis of cofactors);01240(Biosynthesis of cofactors)	K06210	EC:2.7.7.1;EC:2.7.7.18	NA	nicotinamide nucleotide adenylyltransferase 1 [Source:HGNC Symbol;Acc:HGNC:17877]	protein_coding;nonsense_mediated_decay;processed_transcript	NA	R-HSA-200512(NMNAT1 transfers an adenylyl group from ATP to NAMN to yield NAAD)	0.813445	0.577728	1.01377	0.822679	1.10273	1.46882	1.3124	1.79556	1.10759	1.30414	1.53554	1.23177	1.88017	2.08748	0.31413	0.163795	0.429088	0.591047	0.426089	0.2056	0.207552	0.102728	0.235422	0.0901256	0.383852	0.25149	0.39869	0.369404	4.33048	2.11453	3.5482e-56	6.19824e-53	up	yes
ENSG00000215271	HOMEZ	57594	ENST00000357460;ENST00000558278;ENST00000561013	GO:0000785(chromatin);GO:0000981(DNA-binding transcription factor activity, RNA polymerase II-specific);GO:0003677(DNA binding);GO:0005515(protein binding);GO:0005634(nucleus);GO:0005654(nucleoplasm);GO:0005730(nucleolus);GO:0005829(cytosol);GO:0006355(regulation of DNA-templated transcription);GO:0006357(regulation of transcription by RNA polymerase II);GO:0006357(regulation of transcription by …	NA	NA	NA	Homeobox	homeobox and leucine zipper encoding [Source:HGNC Symbol;Acc:HGNC:20164]	protein_coding;processed_transcript	NA	NA	0.724604	0.503703	1.23558	0.990993	0.877343	1.00923	0.93826	1.11592	1.26647	1.25565	2.41304	1.26761	1.5799	2.04996	0.192978	0.0781711	0.273235	0.25252	0.259987	0.110315	0.199427	0.122323	0.157832	0.112654	0.249427	0.153929	0.195015	0.221902	6.67837	2.7395	4.73482e-56	7.92648e-53	up	yes
ENSG00000105085	MED26	9441	ENST00000597244;ENST00000600060;ENST00000263390;ENST00000598608;ENST00000601478	GO:0003712(transcription coregulator activity);GO:0003713(transcription coactivator activity);GO:0005515(protein binding);GO:0005634(nucleus);GO:0005654(nucleoplasm);GO:0006357(regulation of transcription by RNA polymerase II);GO:0006367(transcription initiation at RNA polymerase II promoter);GO:0010628(positive regulation of gene expression);GO:0016592(mediator complex);GO:0032968(positive regul…	NA	NA	NA	NA	mediator complex subunit 26 [Source:HGNC Symbol;Acc:HGNC:2376]	retained_intron;protein_coding	NA	R-HSA-1183003(Expression of Leptin);R-HSA-1183058(Expression of Adiponectin);R-HSA-212352(Formation of ARC coactivator complex);R-HSA-381309(PPARG:RXRA heterodimer binds to fatty acid-like ligands);R-HSA-560472(Expression of Phosphoenolpyruvate carboxykinase 1 (PEPCK-C));R-HSA-560473(Expression of ANGPTL4);R-HSA-560491(Expression of CEBPA);R-HSA-560493(Expression of Perilipin (PLIN));R-HSA-560498…	1.31118	0.719023	0.988474	0.811175	1.11586	1.84652	1.24967	1.57342	1.42355	1.61292	1.84558	1.55367	1.99053	1.97517	2.70072	2.27844	3.85415	4.15169	4.62325	2.67923	2.96163	2.41626	2.80824	0.871329	4.25326	4.68977	2.86195	3.73499	0.445957	-1.16502	5.3747e-56	8.63779e-53	down	yes
ENSG00000106366	SERPINE1	5054	ENST00000223095	GO:0001525(angiogenesis);GO:0002020(protease binding);GO:0004867(serine-type endopeptidase inhibitor activity);GO:0005102(signaling receptor binding);GO:0005515(protein binding);GO:0005576(extracellular region);GO:0005615(extracellular space);GO:0005886(plasma membrane);GO:0010466(negative regulation of peptidase activity);GO:0010469(regulation of signaling receptor activity);GO:0010757(negative …	04066(HIF-1 signaling pathway);04115(p53 signaling pathway);04218(Cellular senescence);04371(Apelin signaling pathway);04390(Hippo signaling pathway);04610(Complement and coagulation cascades);04933(AGE-RAGE signaling pathway in diabetic complications);05142(Chagas disease)	NA	NA	NA	serpin family E member 1 [Source:HGNC Symbol;Acc:HGNC:8583]	protein_coding	DOID:0014667(disease_of_metabolism);DOID:0050013(carbohydrate_metabolism_disease);DOID:0050117(disease_by_infectious_agent);DOID:0050155(sensory_system_disease);DOID:0050161(lower_respiratory_tract_disease);DOID:0050177(monogenic_disease);DOID:0050338(primary_bacterial_infectious_disease);DOID:0050621(respiratory_system_benign_neoplasm);DOID:0050686(organ_system_cancer);DOID:0050687(cell_type_can…	R-HSA-158795(fibrin multimer, crosslinked:tissue plasminogen activator (one-chain) + plasminogen activator inhibitor 1 -> fibrin multimer, crosslinked:tissue plasminogen activator (one-chain):plasminogen activator inhibitor 1);R-HSA-158800(fibrin multimer, crosslinked:tissue plasminogen activator (two-chain) + plasminogen activator inhibitor 1 -> fibrin multimer, crosslinked:tissue plasminogen ac…	14.5475	16.1753	10.4349	15.6212	13.865	15.0705	14.0598	14.7007	13.975	16.065	0.945677	14.8278	16.1588	15.8998	1.18782	0.793242	0.991302	0.93586	0.977113	0.385318	0.823038	0.206099	0.515311	0.257286	0.392183	0.435891	0.287935	1.00468	20.923	4.38702	3.30666e-55	5.1098e-52	up	yes
ENSG00000206053	JPT2	90861	ENST00000248098;ENST00000562684;ENST00000566925;ENST00000565851;ENST00000567717;ENST00000561516;ENST00000569256;ENST00000562569;ENST00000382710;ENST00000569765;ENST00000566691	GO:0005515(protein binding);GO:0005634(nucleus);GO:0005737(cytoplasm);GO:0005829(cytosol);GO:0005886(plasma membrane);GO:0050848(regulation of calcium-mediated signaling);GO:0075509(endocytosis involved in viral entry into host cell);GO:0075509(endocytosis involved in viral entry into host cell)	NA	NA	NA	NA	Jupiter microtubule associated homolog 2 [Source:HGNC Symbol;Acc:HGNC:14137]	protein_coding;nonsense_mediated_decay;retained_intron;processed_transcript	NA	NA	2.00227	1.40824	2.3787	1.77133	2.37941	3.35464	2.50939	3.38188	4.24764	4.14117	3.77918	4.20525	5.1148	5.59527	0.904031	0.580634	0.689708	1.11662	1.04506	0.553791	0.87006	0.30666	0.604877	0.382978	0.74001	0.611469	0.689541	1.04496	4.56285	2.18994	6.23424e-55	9.27701e-52	up	yes
ENSG00000179094	PER1	5187	ENST00000317276;ENST00000583677;ENST00000585095;ENST00000581395;ENST00000579098;ENST00000577424;ENST00000579065;ENST00000584202;ENST00000585284;ENST00000354903;ENST00000581703;ENST00000578223;ENST00000579203;ENST00000578089;ENST00000578950;ENST00000577253	GO:0000122(negative regulation of transcription by RNA polymerase II);GO:0000976(transcription cis-regulatory region binding);GO:0000978(RNA polymerase II cis-regulatory region sequence-specific DNA binding);GO:0001222(transcription corepressor binding);GO:0002028(regulation of sodium ion transport);GO:0005515(protein binding);GO:0005634(nucleus);GO:0005654(nucleoplasm);GO:0005737(cytoplasm);GO:0…	04710(Circadian rhythm);04713(Circadian entrainment);04713(Circadian entrainment)	NA	NA	NA	period circadian regulator 1 [Source:HGNC Symbol;Acc:HGNC:8845]	protein_coding;retained_intron;nonsense_mediated_decay;processed_transcript	DOID:0050686(organ_system_cancer);DOID:0060037(developmental_disorder_of_mental_health);DOID:0060040(pervasive_developmental_disorder);DOID:0060041(autism_spectrum_disorder);DOID:10155(intestinal_cancer);DOID:1192(peripheral_nervous_system_neoplasm);DOID:12849(autistic_disorder);DOID:1289(neurodegenerative_disease);DOID:1307(dementia);DOID:14330(Parkinson's_disease);DOID:14566(disease_of_cellular…	R-HSA-1856948(Formation of CRY:PER:Kinase complex);R-HSA-400219(Beta-TrCP1 binds phosphorylated PER proteins);R-HSA-400256(CRY:PER heterodimer binds the BMAL1:CLOCK/NPAS2 heterodimer);R-HSA-400267(BTRC:CUL1:SKP1 (SCF-beta-TrCP1) ubiquitinylates PER proteins);R-HSA-400382(CSNK1E,CSNK1D phosphorylate CRY and PER proteins);R-HSA-549385(CRY:PER:Kinase complex translocates to the nucleus);R-HSA-549533…	5.1382	1.89204	2.25231	1.25061	2.36741	6.25802	3.82002	8.86392	3.55408	3.86484	3.76123	6.08747	2.4009	3.88936	33.3468	31.927	21.643	36.3785	90.6662	58.2457	38.8428	24.524	33.9271	13.6265	25.9447	88.1281	21.1533	44.9475	0.0983495	-3.34594	1.06589e-54	1.52948e-51	down	yes
ENSG00000171115	GIMAP8	155038	ENST00000307271	GO:0000166(nucleotide binding);GO:0005525(GTP binding);GO:0005737(cytoplasm);GO:0005739(mitochondrion);GO:0005783(endoplasmic reticulum);GO:0005794(Golgi apparatus);GO:0005829(cytosol);GO:0070232(regulation of T cell apoptotic process)	NA	NA	NA	NA	GTPase, IMAP family member 8 [Source:HGNC Symbol;Acc:HGNC:21792]	protein_coding	NA	NA	7.33903	11.7846	18.7563	14.2177	18.0691	12.9268	12.8162	14.5127	25.5966	11.6233	34.887	16.9144	21.9876	25.6276	3.56705	1.41722	2.01629	2.11738	3.25108	1.23667	3.64238	1.236	0.721262	0.432703	2.54364	1.59244	1.95464	3.82671	8.35916	3.06336	1.25552e-54	1.73946e-51	up	yes
ENSG00000090889	KIF4A	24137	ENST00000374403;ENST00000485406	GO:0000166(nucleotide binding);GO:0000281(mitotic cytokinesis);GO:0003677(DNA binding);GO:0003777(microtubule motor activity);GO:0005515(protein binding);GO:0005524(ATP binding);GO:0005634(nucleus);GO:0005654(nucleoplasm);GO:0005694(chromosome);GO:0005737(cytoplasm);GO:0005819(spindle);GO:0005829(cytosol);GO:0005856(cytoskeleton);GO:0005874(microtubule);GO:0005876(spindle microtubule);GO:0006996(…	NA	NA	NA	NA	kinesin family member 4A [Source:HGNC Symbol;Acc:HGNC:13339]	protein_coding;processed_transcript	DOID:0050177(monogenic_disease);DOID:0050736(autosomal_dominant_disease);DOID:0050739(autosomal_genetic_disease);DOID:4(disease);DOID:5683(hereditary_breast_ovarian_cancer);DOID:630(genetic_disease)	R-HSA-2213248(Transport of antigen loaded MHC II molecules to surface);R-HSA-445071(Reinsertion of L1 into the plasma membrane);R-HSA-445077(Transport of L1 from C-domain to P-domain);R-HSA-6811423(Retrograde vesicle is tethered at the ER by the NRZ complex and t-SNAREs);R-HSA-6811426(Retrograde COPI vesicles bind kinesin and microtubules);R-HSA-983259(Kinesins move along microtubules consuming A…	0.833734	0.792088	0.664643	0.961435	0.885393	1.01199	1.08294	1.21919	1.5723	2.05058	0.384293	1.46693	1.90455	1.92727	0.0935374	0.106171	0.115564	0.1102	0.139334	0.0873819	0.0365938	0.0127341	0.0767243	0.0571937	0.0588489	0.0772213	0.0546116	0.123828	14.5723	3.86516	3.31273e-54	4.43663e-51	up	yes
ENSG00000258890	CEP95	90799	ENST00000581885;ENST00000582698;ENST00000581980;ENST00000579637;ENST00000580285;ENST00000582724;ENST00000584857;ENST00000577960;ENST00000579478;ENST00000581056;ENST00000556440;ENST00000580188;ENST00000577476;ENST00000553956;ENST00000579117;ENST00000583457;ENST00000583676;ENST00000579860	GO:0000922(spindle pole);GO:0005515(protein binding);GO:0005737(cytoplasm);GO:0005813(centrosome);GO:0005815(microtubule organizing center);GO:0005856(cytoskeleton);GO:0016020(membrane);GO:0016021(integral component of membrane);GO:0016021(integral component of membrane)	NA	NA	NA	NA	centrosomal protein 95 [Source:HGNC Symbol;Acc:HGNC:25141]	retained_intron;protein_coding;nonsense_mediated_decay;processed_transcript	NA	NA	0.976964	0.60704	1.27731	0.848837	1.29208	1.83999	1.44778	2.22456	1.56024	1.64316	1.42747	1.59784	2.20141	2.44545	4.41741	2.2652	3.22087	4.74954	3.8821	2.17911	3.32602	1.67911	2.47044	0.888287	2.48819	4.41567	2.39423	4.49381	0.498954	-1.00302	4.0065e-54	5.19268e-51	down	yes
ENSG00000128510	CPA4	51200	ENST00000222482;ENST00000474254;ENST00000490117;ENST00000488025;ENST00000497388;ENST00000445470;ENST00000470542	GO:0004180(carboxypeptidase activity);GO:0004181(metallocarboxypeptidase activity);GO:0005515(protein binding);GO:0005575(cellular_component);GO:0005576(extracellular region);GO:0005615(extracellular space);GO:0006508(proteolysis);GO:0008233(peptidase activity);GO:0008237(metallopeptidase activity);GO:0008270(zinc ion binding);GO:0016573(histone acetylation);GO:0016787(hydrolase activity);GO:0046…	NA	NA	NA	NA	carboxypeptidase A4 [Source:HGNC Symbol;Acc:HGNC:15740]	protein_coding;retained_intron;processed_transcript	DOID:14566(disease_of_cellular_proliferation);DOID:162(cancer);DOID:4(disease)	NA	1.57739	1.49439	0.863486	1.46818	1.40039	1.3294	1.4054	1.53521	1.33454	2.11211	0.0765348	1.48097	1.38965	1.97353	0	0	0	0	0	0	0	0	0.0123738	0	0	0	0	0	1571.15	10.6176	3.12084e-53	3.91841e-50	up	yes
ENSG00000060642	PIGV	55650	ENST00000374145;ENST00000691135;ENST00000674222;ENST00000686194;ENST00000686422;ENST00000691454;ENST00000688522;ENST00000688730;ENST00000674273;ENST00000674202;ENST00000689130;ENST00000674335;ENST00000693629;ENST00000455364;ENST00000686655	GO:0000009(alpha-1,6-mannosyltransferase activity);GO:0000030(mannosyltransferase activity);GO:0004376(glycolipid mannosyltransferase activity);GO:0005515(protein binding);GO:0005783(endoplasmic reticulum);GO:0005789(endoplasmic reticulum membrane);GO:0006506(GPI anchor biosynthetic process);GO:0016020(membrane);GO:0016021(integral component of membrane);GO:0016254(preassembly of GPI anchor in ER…	00563(Glycosylphosphatidylinositol (GPI)-anchor biosynthesis);01100(Metabolic pathways);01100(Metabolic pathways)	NA	NA	NA	phosphatidylinositol glycan anchor biosynthesis class V [Source:HGNC Symbol;Acc:HGNC:26031]	protein_coding;retained_intron	DOID:0060037(developmental_disorder_of_mental_health);DOID:0060038(specific_developmental_disorder);DOID:1059(intellectual_disability);DOID:150(disease_of_mental_health);DOID:225(syndrome);DOID:4(disease)	R-HSA-162873((ethanolamineP) mannose (a1-4) glucosaminyl-acyl-PI + dolichol phosphate D-mannose -> mannose (a1-6) (ethanolamineP) mannose (a1-4) glucosaminyl-acyl-PI + dolichol phosphate)	0.828373	0.534127	1.06385	0.679969	1.04648	1.09445	1.00072	1.26463	1.33052	1.13368	1.39446	1.45196	1.73189	1.93621	0.48687	0.372619	0.371053	0.522877	0.460311	0.264979	0.458925	0.173834	0.234404	0.0769816	0.36503	0.48413	0.43154	0.50806	3.16434	1.6619	3.44233e-53	4.19109e-50	up	yes
ENSG00000197771	MCMBP	79892	ENST00000369077;ENST00000360003;ENST00000466047;ENST00000495407	GO:0003682(chromatin binding);GO:0005515(protein binding);GO:0005634(nucleus);GO:0005654(nucleoplasm);GO:0005829(cytosol);GO:0006260(DNA replication);GO:0006261(DNA-templated DNA replication);GO:0007049(cell cycle);GO:0007062(sister chromatid cohesion);GO:0030054(cell junction);GO:0042555(MCM complex);GO:0051301(cell division);GO:0051301(cell division)	NA	NA	NA	NA	minichromosome maintenance complex binding protein [Source:HGNC Symbol;Acc:HGNC:25782]	protein_coding;processed_transcript	NA	NA	5.50398	4.43953	7.65583	6.00976	7.73272	10.4774	8.76904	10.4191	11.1656	7.46777	11.581	8.00133	14.6689	13.8519	4.25853	2.7391	4.25285	5.41661	4.28989	2.15396	3.57741	1.78184	2.51829	1.15356	4.81795	4.90166	3.24368	4.8422	2.55756	1.35477	5.81656e-53	6.87347e-50	up	yes
ENSG00000130844	ZNF331	55422	ENST00000648511;ENST00000509585;ENST00000505426;ENST00000648122;ENST00000648397;ENST00000511154;ENST00000513999;ENST00000504940;ENST00000253144;ENST00000512387;ENST00000513929;ENST00000449416;ENST00000504033;ENST00000649326;ENST00000505949;ENST00000648236;ENST00000509069;ENST00000649816;ENST00000650177;ENST00000649780;ENST00000502616;ENST00000511567;ENST00000502248;ENST00000514374	GO:0000978(RNA polymerase II cis-regulatory region sequence-specific DNA binding);GO:0000981(DNA-binding transcription factor activity, RNA polymerase II-specific);GO:0003677(DNA binding);GO:0005634(nucleus);GO:0006355(regulation of DNA-templated transcription);GO:0006357(regulation of transcription by RNA polymerase II);GO:0008270(zinc ion binding);GO:0046872(metal ion binding);GO:0046872(metal …	05168(Herpes simplex virus 1 infection);05168(Herpes simplex virus 1 infection)	NA	NA	zf-C2H2	zinc finger protein 331 [Source:HGNC Symbol;Acc:HGNC:15489]	protein_coding;retained_intron;processed_transcript	DOID:0060072(benign_neoplasm);DOID:0060084(cell_type_benign_neoplasm);DOID:14566(disease_of_cellular_proliferation);DOID:4(disease);DOID:657(adenoma)	R-HSA-975040(KRAB-ZNF / KAP Interaction)	0.375666	0.267633	0.574133	0.384095	0.431955	0.842599	0.574097	1.11001	0.733777	0.963203	0.805981	0.935288	1.10769	1.34881	4.13683	2.56072	2.64533	4.31803	5.49967	2.39564	2.88373	1.37864	4.85957	1.15662	1.63042	3.52571	2.31472	4.61419	0.238046	-2.07069	7.33613e-53	8.42146e-50	down	yes
ENSG00000159131	GART	2618	ENST00000381839;ENST00000361093;ENST00000381815;ENST00000488791;ENST00000467575;ENST00000366093;ENST00000466882;ENST00000438059;ENST00000487155;ENST00000497313;ENST00000381831;ENST00000424203;ENST00000426819;ENST00000430874;ENST00000482663;ENST00000441403;ENST00000476524	GO:0000166(nucleotide binding);GO:0003360(brainstem development);GO:0003824(catalytic activity);GO:0004637(phosphoribosylamine-glycine ligase activity);GO:0004641(phosphoribosylformylglycinamidine cyclo-ligase activity);GO:0004644(phosphoribosylglycinamide formyltransferase activity);GO:0005524(ATP binding);GO:0005829(cytosol);GO:0006164(purine nucleotide biosynthetic process);GO:0006177(GMP bios…	00230(Purine metabolism);00670(One carbon pool by folate);01100(Metabolic pathways);01523(Antifolate resistance);01523(Antifolate resistance)	K11787	EC:2.1.2.2;EC:6.3.3.1;EC:6.3.4.13	NA	phosphoribosylglycinamide formyltransferase, phosphoribosylglycinamide synthetase, phosphoribosylaminoimidazole synthetase [Source:HGNC Symbol;Acc:HGNC:4163]	protein_coding;retained_intron;nonsense_mediated_decay;processed_transcript	NA	R-HSA-73810(FGAM + ATP => AIR + ADP + Pi);R-HSA-73813(GAR + 10-Formyl-THF => FGAR + THF);R-HSA-73814(5-Phosphoribosylamine + Glycine + ATP => GAR + ADP + Pi)	1.53524	1.73808	2.29094	1.88515	2.73584	2.51965	2.18519	3.02113	4.87601	4.08118	4.77566	3.40152	4.86163	5.17757	0.921011	0.617694	1.10644	1.20926	1.33116	0.490776	0.843447	0.371024	0.567955	0.223816	0.871014	1.00302	0.930246	1.0774	3.89863	1.96297	7.33128e-52	8.18212e-49	up	yes
ENSG00000218018	RBM38-AS1	100291105	ENST00000686390;ENST00000417346;ENST00000670533	NA	NA	NA	NA	NA	RBM38 antisense RNA 1 [Source:HGNC Symbol;Acc:HGNC:40725]	lncRNA	NA	NA	0.483779	0.197436	0.476798	0.238302	0.498507	0.940539	0.46686	0.78666	0.545841	0.602748	0.612038	0.424267	0.496261	0.654684	2.14052	1.40499	2.01974	2.25077	2.51104	1.46939	2.21605	0.844191	2.27771	0.42002	1.55087	2.05622	1.37318	2.45983	0.297054	-1.75121	2.21023e-51	2.40007e-48	down	yes
ENSG00000119508	NR4A3	8013	ENST00000330847;ENST00000395097;ENST00000618101;ENST00000338488	GO:0000122(negative regulation of transcription by RNA polymerase II);GO:0000785(chromatin);GO:0000978(RNA polymerase II cis-regulatory region sequence-specific DNA binding);GO:0000981(DNA-binding transcription factor activity, RNA polymerase II-specific);GO:0001228(DNA-binding transcription activator activity, RNA polymerase II-specific);GO:0003677(DNA binding);GO:0003700(DNA-binding transcripti…	05202(Transcriptional misregulation in cancer);05202(Transcriptional misregulation in cancer)	NA	NA	NGFIB-like	nuclear receptor subfamily 4 group A member 3 [Source:HGNC Symbol;Acc:HGNC:7982]	protein_coding	DOID:0050686(organ_system_cancer);DOID:0060083(immune_system_cancer);DOID:1240(leukemia);DOID:14566(disease_of_cellular_proliferation);DOID:150(disease_of_mental_health);DOID:1561(cognitive_disorder);DOID:162(cancer);DOID:2468(psychotic_disorder);DOID:2531(hematologic_cancer);DOID:3312(bipolar_disorder);DOID:3324(mood_disorder);DOID:4(disease);DOID:5419(schizophrenia)	R-HSA-376419(Formation of NR-MED1 Coactivator Complex);R-HSA-382096(Formation of NR-NCOR Corepressor Complex);R-HSA-8938034(NR4A3 gene expression is stimulated by RUNX1:CBFB)	0.0394179	0.0384346	0.0791339	0.0439951	0.0411213	0.189527	0.0587075	0.0402836	0.025442	0.0910692	0.0440801	0.00915002	0.085712	0.0637718	1.60073	1.46202	0.616626	0.89279	2.79142	0.643654	1.82559	0.347508	1.24191	0.155859	0.470166	1.56041	0.832101	1.58897	0.0530168	-4.23741	2.29695e-50	2.4286e-47	down	yes
ENSG00000122966	CIT	11113,79947	ENST00000676849;ENST00000392521;ENST00000679285;ENST00000678708;ENST00000677738;ENST00000543239;ENST00000544588;ENST00000544872;ENST00000261833;ENST00000545913;ENST00000676833;ENST00000678155;ENST00000544800;ENST00000677927;ENST00000677812;ENST00000488203;ENST00000678236;ENST00000536008;ENST00000543324;ENST00000677438;ENST00000469414;ENST00000677849;ENST00000679120;ENST00000679061;ENST00000676693	GO:0000086(G2/M transition of mitotic cell cycle);GO:0000166(nucleotide binding);GO:0000278(mitotic cell cycle);GO:0000281(mitotic cytokinesis);GO:0001223(transcription coactivator binding);GO:0001889(liver development);GO:0004672(protein kinase activity);GO:0004674(protein serine/threonine kinase activity);GO:0004712(protein serine/threonine/tyrosine kinase activity);GO:0005515(protein binding);…	NA	K16308	EC:2.7.11.1	NA	citron rho-interacting serine/threonine kinase [Source:HGNC Symbol;Acc:HGNC:1985]	protein_coding;retained_intron;nonsense_mediated_decay	NA	R-HSA-5625901(CIT (citron kinase) binds activated RHOA, RHOB, RHOC and RAC1);R-HSA-5671919(Activated CIT phosphorylates MRLCs);R-HSA-5671970(Activated CIT binds KIF14 and PRC1);R-HSA-5671972(CIT binds CDKN1B);R-HSA-5671993(CIT-3 binds DLG4);R-HSA-8981443(CIT-3 binds activated RHOA, RHOB, RHOC and RAC1);R-HSA-9013009(RHOA binds effectors at the plasma membrane);R-HSA-9013024(RHOB binds effectors a…	0.181793	0.176128	0.146939	0.153857	0.200808	0.2006	0.19877	0.172258	0.314002	0.373381	0.0953705	0.264096	0.28211	0.383565	0.0352804	0.0133866	0.0476261	0.0251135	0.052519	0.0234911	0.0271162	0.0105604	0.019074	0.00875248	0.0317626	0.0396283	0.0409084	0.0331406	7.6983	2.94454	3.06976e-50	3.16249e-47	up	yes
ENSG00000239305	RNF103	7844	ENST00000472030;ENST00000463333;ENST00000465629;ENST00000472680;ENST00000477307;ENST00000237455	GO:0004842(ubiquitin-protein transferase activity);GO:0005515(protein binding);GO:0005783(endoplasmic reticulum);GO:0005789(endoplasmic reticulum membrane);GO:0007417(central nervous system development);GO:0016020(membrane);GO:0016021(integral component of membrane);GO:0016567(protein ubiquitination);GO:0016740(transferase activity);GO:0030433(ubiquitin-dependent ERAD pathway);GO:0044322(endoplas…	NA	K15695	EC:2.3.2.27	NA	ring finger protein 103 [Source:HGNC Symbol;Acc:HGNC:12859]	retained_intron;processed_transcript;protein_coding	NA	R-HSA-8867288(OS9:SEL1:ERAD E3 ligase:DERL2 ubiquitinates unfolded protein:(GlcNAc)2 (Man)9-5)	2.36418	1.16523	2.20857	1.63164	2.52286	3.1093	2.83386	5.0307	2.59118	2.37189	2.56244	2.65825	3.88493	3.82256	8.15923	4.90047	7.90601	9.3996	8.54175	4.80318	6.40368	3.62691	3.77109	1.24322	6.51929	8.75099	5.02587	9.56242	0.437377	-1.19305	4.43138e-50	4.4511e-47	down	yes
ENSG00000196715	VKORC1L1	154807	ENST00000648179;ENST00000648187;ENST00000360768;ENST00000434382	GO:0005515(protein binding);GO:0005783(endoplasmic reticulum);GO:0005789(endoplasmic reticulum membrane);GO:0016020(membrane);GO:0016021(integral component of membrane);GO:0016491(oxidoreductase activity);GO:0016900(oxidoreductase activity, acting on the CH-OH group of donors, disulfide as acceptor);GO:0017187(peptidyl-glutamic acid carboxylation);GO:0034599(cellular response to oxidative stress)…	00130(Ubiquinone and other terpenoid-quinone biosynthesis);01100(Metabolic pathways);01240(Biosynthesis of cofactors);01240(Biosynthesis of cofactors)	K05357	EC:1.17.4.4	NA	vitamin K epoxide reductase complex subunit 1 like 1 [Source:HGNC Symbol;Acc:HGNC:21492]	protein_coding	NA	R-HSA-6806647(VKORC1L1 reduces vitamin K epoxide to MK4 (vitamin K hydroquinone))	1.32134	1.14195	2.38117	1.4229	2.34603	2.13449	1.91887	3.00159	2.51017	3.15977	2.43348	2.89501	4.28472	3.89346	0.760052	0.585119	0.598416	1.08927	1.07744	0.314103	0.462441	0.431342	0.407209	0.150855	0.708306	0.925246	0.575739	0.661563	3.9836	1.99407	1.07874e-49	1.05711e-46	up	yes
ENSG00000121931	LRIF1	55791	ENST00000369763;ENST00000485275;ENST00000494675	GO:0000781(chromosome, telomeric region);GO:0001740(Barr body);GO:0005515(protein binding);GO:0005634(nucleus);GO:0005654(nucleoplasm);GO:0005694(chromosome);GO:0006355(regulation of DNA-templated transcription);GO:0009048(dosage compensation by inactivation of X chromosome);GO:0016363(nuclear matrix);GO:0034451(centriolar satellite);GO:0042974(nuclear retinoic acid receptor binding);GO:0042974(n…	NA	NA	NA	NA	ligand dependent nuclear receptor interacting factor 1 [Source:HGNC Symbol;Acc:HGNC:30299]	protein_coding	NA	NA	3.00495	1.62441	2.93179	1.85964	3.03802	3.00591	2.72121	5.4596	3.71322	3.58392	4.49839	3.01883	6.93129	5.92631	1.30547	0.57284	0.981719	1.0889	1.44862	0.400947	1.06375	0.397749	0.469543	0.193	0.78045	1.40274	0.668751	1.14502	4.30534	2.10613	1.91498e-49	1.82185e-46	up	yes
ENSG00000161800	RACGAP1	29127	ENST00000427314;ENST00000312377;ENST00000454520;ENST00000551016;ENST00000548247;ENST00000546786;ENST00000550149;ENST00000546723;ENST00000546764;ENST00000547905;ENST00000548158;ENST00000546595;ENST00000548824;ENST00000551876;ENST00000548961;ENST00000552157;ENST00000548644;ENST00000547061;ENST00000551260;ENST00000548320;ENST00000552921;ENST00000551145;ENST00000549777;ENST00000549342	GO:0000281(mitotic cytokinesis);GO:0000915(actomyosin contractile ring assembly);GO:0001669(acrosomal vesicle);GO:0005096(GTPase activator activity);GO:0005515(protein binding);GO:0005547(phosphatidylinositol-3,4,5-trisphosphate binding);GO:0005634(nucleus);GO:0005654(nucleoplasm);GO:0005737(cytoplasm);GO:0005819(spindle);GO:0005829(cytosol);GO:0005856(cytoskeleton);GO:0005874(microtubule);GO:000…	NA	NA	NA	NA	Rac GTPase activating protein 1 [Source:HGNC Symbol;Acc:HGNC:9804]	protein_coding;retained_intron;processed_transcript;nonsense_mediated_decay	DOID:14566(disease_of_cellular_proliferation);DOID:162(cancer);DOID:4(disease)	R-HSA-2213248(Transport of antigen loaded MHC II molecules to surface);R-HSA-6811423(Retrograde vesicle is tethered at the ER by the NRZ complex and t-SNAREs);R-HSA-6811426(Retrograde COPI vesicles bind kinesin and microtubules);R-HSA-8981637(RHOA GAPs stimulate RHOA GTPase activity);R-HSA-9013022(RHOB GAPs stimulate RHOB GTPase activity);R-HSA-9013111(RHOC GAPs stimulate RHOC GTPase activity);R-…	1.86483	1.66116	1.40604	1.6628	2.29149	2.1843	1.97673	2.51729	3.84497	4.40382	2.08272	3.93343	4.60883	5.1693	0.490548	0.373152	0.664442	0.731233	0.598366	0.377737	0.666937	0.168535	0.25488	0.206106	0.498906	0.488738	0.369007	0.523224	6.1773	2.62698	1.94981e-49	1.82185e-46	up	yes
ENSG00000084733	RAB10	10890	ENST00000264710;ENST00000462003;ENST00000473035	GO:0000139(Golgi membrane);GO:0000145(exocyst);GO:0000166(nucleotide binding);GO:0003924(GTPase activity);GO:0003925(G protein activity);GO:0005515(protein binding);GO:0005525(GTP binding);GO:0005737(cytoplasm);GO:0005768(endosome);GO:0005783(endoplasmic reticulum);GO:0005789(endoplasmic reticulum membrane);GO:0005794(Golgi apparatus);GO:0005802(trans-Golgi network);GO:0005829(cytosol);GO:0005856…	04144(Endocytosis);04152(AMPK signaling pathway);04152(AMPK signaling pathway)	NA	NA	NA	RAB10, member RAS oncogene family [Source:HGNC Symbol;Acc:HGNC:9759]	protein_coding;processed_transcript	NA	R-HSA-1445143(RAB8A,10,13,14 hydrolyze GTP);R-HSA-2255343(RAB8A,10,13,14 exchange GDP for GTP);R-HSA-2316352(SLC2A4 (GLUT4) vesicle translocates and docks at the plasma membrane);R-HSA-6798743(Exocytosis of secretory granule membrane proteins);R-HSA-8870466(RGGT:CHM binds RABs);R-HSA-8870469(RGGT geranylgeranylates RAB proteins);R-HSA-8876188(DENND4s exchange GTP for GDP on RAB10)	14.9317	14.7925	19.8482	17.0965	21.6933	29.6088	23.6361	32.143	27.5315	19.0304	29.4923	18.7403	35.2737	28.6622	7.76958	3.9991	9.32014	9.77751	7.21162	3.62122	6.10749	2.3322	3.87771	1.42282	8.83382	8.38707	9.21718	10.0603	3.61636	1.85454	2.14755e-49	1.961e-46	up	yes
ENSG00000104332	SFRP1	6422	ENST00000220772	GO:0001649(osteoblast differentiation);GO:0001657(ureteric bud development);GO:0001756(somitogenesis);GO:0001843(neural tube closure);GO:0001954(positive regulation of cell-matrix adhesion);GO:0002244(hematopoietic progenitor cell differentiation);GO:0003402(planar cell polarity pathway involved in axis elongation);GO:0004197(cysteine-type endopeptidase activity);GO:0005109(frizzled binding);GO:0…	04310(Wnt signaling pathway)	NA	NA	NA	secreted frizzled related protein 1 [Source:HGNC Symbol;Acc:HGNC:10776]	protein_coding	DOID:0050155(sensory_system_disease);DOID:0050615(respiratory_system_cancer);DOID:0050686(organ_system_cancer);DOID:0050687(cell_type_cancer);DOID:0060083(immune_system_cancer);DOID:0070004(myeloma);DOID:1036(chronic_leukemia);DOID:1037(lymphoblastic_leukemia);DOID:1040(chronic_lymphocytic_leukemia);DOID:10534(stomach_cancer);DOID:1107(esophageal_carcinoma);DOID:1240(leukemia);DOID:1324(lung_canc…	R-HSA-1458875(WNT binds to FZD and LRP5/6);R-HSA-3772441(sFRP binds WNT3A and inhibits WNT:FZD binding);R-NUL-3772439(sFrp binds Wnt3a and inhibits WNT-FZD binding)	2.37567	2.41943	1.66666	2.54221	2.09743	2.44345	2.63419	2.46517	4.90071	5.89453	0.0140909	6.35458	5.65491	6.8627	0.079522	0.0365684	0.12493	0.045088	0.0842812	0.0476864	0.0519354	0.0124705	0.0758286	0.023117	0.0458491	0.176525	0.0642644	0.0485843	52.7199	5.72028	3.51283e-49	3.13641e-46	up	yes
ENSG00000168329	CX3CR1	1524	ENST00000399220;ENST00000358309;ENST00000435290;ENST00000542107;ENST00000541347;ENST00000412814	GO:0002052(positive regulation of neuroblast proliferation);GO:0002250(adaptive immune response);GO:0002282(microglial cell activation involved in immune response);GO:0002376(immune system process);GO:0002931(response to ischemia);GO:0004896(cytokine receptor activity);GO:0004930(G protein-coupled receptor activity);GO:0004950(chemokine receptor activity);GO:0005515(protein binding);GO:0005886(pl…	04060(Cytokine-cytokine receptor interaction);04061(Viral protein interaction with cytokine and cytokine receptor);04062(Chemokine signaling pathway);04062(Chemokine signaling pathway)	NA	NA	NA	C-X3-C motif chemokine receptor 1 [Source:HGNC Symbol;Acc:HGNC:2558]	protein_coding	DOID:0050117(disease_by_infectious_agent);DOID:0050155(sensory_system_disease);DOID:0050161(lower_respiratory_tract_disease);DOID:0050686(organ_system_cancer);DOID:0050700(cardiomyopathy);DOID:0050828(artery_disease);DOID:0060036(intrinsic_cardiomyopathy);DOID:0060083(immune_system_cancer);DOID:0080001(bone_disease);DOID:1037(lymphoblastic_leukemia);DOID:10591(pre_eclampsia);DOID:10652(Alzheimer'…	R-HSA-373342(CX3CR1 binds CX3CL1);R-HSA-380073(Liganded Gi-activating GPCR acts as a GEF for Gi);R-HSA-749454(The Ligand:GPCR:Gi complex dissociates);R-HSA-749456(Liganded Gi-activating GPCRs bind inactive heterotrimeric G-protein Gi)	23.228	26.6346	45.9916	38.5213	51.0305	47.2	42.2897	34.1718	90.5216	37.8139	227.432	65.2011	111.882	61.6449	5.34468	2.69608	5.83178	5.2209	3.16809	1.31502	3.94975	0.800063	1.2038	0.682078	5.32387	3.84557	8.3821	5.68428	16.9055	4.07942	4.20806e-49	3.67547e-46	up	yes
ENSG00000150753	CCT5	22948	ENST00000280326;ENST00000515676;ENST00000510326;ENST00000423695;ENST00000511995;ENST00000515390;ENST00000511700;ENST00000503454;ENST00000514674;ENST00000508451;ENST00000509846;ENST00000512975	GO:0000166(nucleotide binding);GO:0003730(mRNA 3'-UTR binding);GO:0005515(protein binding);GO:0005524(ATP binding);GO:0005737(cytoplasm);GO:0005813(centrosome);GO:0005815(microtubule organizing center);GO:0005829(cytosol);GO:0005832(chaperonin-containing T-complex);GO:0005856(cytoskeleton);GO:0005874(microtubule);GO:0006457(protein folding);GO:0007339(binding of sperm to zona pellucida);GO:000961…	NA	NA	NA	NA	chaperonin containing TCP1 subunit 5 [Source:HGNC Symbol;Acc:HGNC:1618]	protein_coding;retained_intron;nonsense_mediated_decay	DOID:331(central_nervous_system_disease);DOID:4(disease);DOID:607(paraplegia);DOID:7(disease_of_anatomical_entity);DOID:863(nervous_system_disease)	R-HSA-389954(Hydrolysis of ATP and release of tubulin folding intermediate from CCT/TriC);R-HSA-389961(ADP is exchanged for ATP in the (ADP:CCT/TriC):tubulin complex);R-HSA-389970(Actin/tubulin:prefoldin complex associates with CCT/TriC);R-HSA-390453(Hydrolysis of ATP and release of folded actin from CCT/TriC);R-HSA-390459(Exchange of ADP for ATP in CCT/TriC:actin complex);R-HSA-390470(Associatio…	9.07745	8.23562	10.2561	11.5795	13.5497	14.2047	12.8855	15.4756	22.8852	20.2777	16.2221	20.2985	27.733	26.4087	4.95153	3.32817	6.4324	6.3081	6.30602	3.01052	4.07878	2.47385	4.55598	1.57145	5.48058	5.35025	6.04958	5.51947	3.502	1.80818	8.41234e-49	7.1913e-46	up	yes
ENSG00000152377	SPOCK1	6695	ENST00000394945;ENST00000282223;ENST00000515091;ENST00000505690;ENST00000509293;ENST00000503916;ENST00000635347	GO:0001558(regulation of cell growth);GO:0001764(neuron migration);GO:0004867(serine-type endopeptidase inhibitor activity);GO:0004869(cysteine-type endopeptidase inhibitor activity);GO:0005509(calcium ion binding);GO:0005515(protein binding);GO:0005576(extracellular region);GO:0005615(extracellular space);GO:0005737(cytoplasm);GO:0007155(cell adhesion);GO:0007399(nervous system development);GO:0…	NA	NA	NA	NA	SPARC (osteonectin), cwcv and kazal like domains proteoglycan 1 [Source:HGNC Symbol;Acc:HGNC:11251]	protein_coding;retained_intron;processed_transcript	DOID:14566(disease_of_cellular_proliferation);DOID:162(cancer);DOID:4(disease)	NA	1.34153	1.13107	1.03869	1.35697	1.33545	1.38455	1.5449	1.50544	2.17581	2.78827	0.140457	2.26145	2.21249	2.20923	0.137918	0.0981653	0.157634	0.0895313	0.142099	0.0797026	0.100828	0.0285596	0.0385087	0.0634387	0.0875011	0.112762	0.0744491	0.157184	16.3901	4.03476	9.49131e-49	7.94462e-46	up	yes
ENSG00000286808	ENSG00000286808		ENST00000667915	NA	NA	NA	NA	NA	novel transcript, antisense to POLR3E	lncRNA	NA	NA	0.584177	0.411334	0.72586	0.196699	0.626517	1.60613	0.868386	0.892202	0.553201	0.969004	0.508521	0.633944	0.881553	1.04509	7.02523	3.95153	3.78915	4.89553	7.45978	2.80644	3.52729	3.01159	2.22405	0.698003	2.88813	4.75463	2.75699	4.7703	0.192501	-2.37706	2.29638e-48	1.88294e-45	down	yes
ENSG00000138413	IDH1	3417	ENST00000446179;ENST00000481557;ENST00000345146;ENST00000484575;ENST00000415282;ENST00000462386;ENST00000415913;ENST00000417583;ENST00000451391	GO:0000287(magnesium ion binding);GO:0004448(isocitrate dehydrogenase [NAD(P)+] activity);GO:0004450(isocitrate dehydrogenase (NADP+) activity);GO:0005515(protein binding);GO:0005576(extracellular region);GO:0005737(cytoplasm);GO:0005739(mitochondrion);GO:0005777(peroxisome);GO:0005782(peroxisomal matrix);GO:0005829(cytosol);GO:0006097(glyoxylate cycle);GO:0006099(tricarboxylic acid cycle);GO:000…	00020(Citrate cycle (TCA cycle));00480(Glutathione metabolism);01100(Metabolic pathways);01200(Carbon metabolism);01210(2-Oxocarboxylic acid metabolism);01230(Biosynthesis of amino acids);04146(Peroxisome);05230(Central carbon metabolism in cancer);05230(Central carbon metabolism in cancer)	K00031	EC:1.1.1.42	NA	isocitrate dehydrogenase (NADP(+)) 1 [Source:HGNC Symbol;Acc:HGNC:5382]	protein_coding;retained_intron	DOID:0050117(disease_by_infectious_agent);DOID:0050686(organ_system_cancer);DOID:0050687(cell_type_cancer);DOID:0060083(immune_system_cancer);DOID:0060100(musculoskeletal_system_cancer);DOID:0070004(myeloma);DOID:1240(leukemia);DOID:1247(blood_coagulation_disease);DOID:14566(disease_of_cellular_proliferation);DOID:162(cancer);DOID:1909(melanoma);DOID:201(connective_tissue_cancer);DOID:2213(hemorr…	R-HSA-389540(isocitrate + NADP+ => 2-oxoglutarate + CO2 + NADPH + H+);R-HSA-389550(isocitrate + NADP+ => 2-oxoglutarate + CO2 + NADPH + H+);R-HSA-6798745(Exocytosis of tertiary granule lumen proteins);R-HSA-6798748(Exocytosis of secretory granule lumen proteins);R-HSA-6800434(Exocytosis of ficolin-rich granule lumen proteins);R-HSA-880053(2-oxoglutarate + NADPH + H+ => (R)-2-hydroxyglutarate + NA…	3.09607	3.34123	4.32815	5.03295	5.48186	4.73912	4.11856	7.1895	6.91798	4.30111	7.41913	5.27595	9.05337	8.86298	1.25905	0.723311	1.84956	1.5572	1.78869	0.657436	0.842682	0.404645	0.634672	0.385499	1.73287	1.56385	1.86606	1.5058	4.71984	2.23874	4.65679e-48	3.74201e-45	up	yes
ENSG00000273188	ENSG00000273188		ENST00000607943	NA	NA	NA	NA	NA	novel transcript, antisense to TRABD	lncRNA	NA	NA	0.571013	0.671927	1.71077	0.988233	1.02681	2.53891	1.43481	1.98421	1.05547	1.37484	0.808233	1.46412	0.691738	1.9545	7.00614	6.00443	8.1819	9.39284	8.58454	3.83319	4.56323	3.842	4.1302	1.20145	5.79229	8.42063	4.61246	9.18778	0.215633	-2.21335	9.49752e-48	7.43838e-45	down	yes
ENSG00000238227	TMEM250	90120	ENST00000418388;ENST00000448040;ENST00000561457;ENST00000447934;ENST00000557985	GO:0003924(GTPase activity);GO:0005515(protein binding);GO:0005634(nucleus);GO:0005654(nucleoplasm);GO:0005737(cytoplasm);GO:0005940(septin ring);GO:0007049(cell cycle);GO:0008104(protein localization);GO:0008284(positive regulation of cell population proliferation);GO:0015630(microtubule cytoskeleton);GO:0016020(membrane);GO:0016021(integral component of membrane);GO:0031105(septin complex);GO:0…	NA	NA	NA	NA	transmembrane protein 250 [Source:HGNC Symbol;Acc:HGNC:31009]	protein_coding;nonsense_mediated_decay	NA	NA	9.22807	7.88589	10.8298	9.17696	12.1091	11.9972	13.4086	12.1137	16.4308	13.7688	20.2992	16.0408	18.1474	14.0358	2.76262	2.06788	3.91364	3.48879	3.99828	1.84282	3.05624	1.92753	2.34326	1.44128	5.34152	3.21576	4.83368	3.58406	4.23284	2.08163	9.62705e-48	7.43838e-45	up	yes
ENSG00000168246	UBTD2	92181	ENST00000393792	GO:0005515(protein binding);GO:0005737(cytoplasm)	NA	NA	NA	NA	ubiquitin domain containing 2 [Source:HGNC Symbol;Acc:HGNC:24463]	protein_coding	NA	NA	1.18696	1.22179	2.04418	1.6054	1.89013	2.54927	1.74825	3.39691	2.33789	1.99	2.00851	2.24818	3.11314	3.35564	0.392136	0.290442	0.757628	0.610323	0.655879	0.390197	0.471418	0.065492	0.266668	0.15081	0.482927	0.552294	0.615184	0.784497	4.73277	2.24269	2.52216e-47	1.91199e-44	up	yes
ENSG00000125885	MCM8	84515	ENST00000610722;ENST00000378886;ENST00000378896;ENST00000265187;ENST00000378883	GO:0000166(nucleotide binding);GO:0000724(double-strand break repair via homologous recombination);GO:0003677(DNA binding);GO:0003678(DNA helicase activity);GO:0003682(chromatin binding);GO:0003697(single-stranded DNA binding);GO:0004386(helicase activity);GO:0005515(protein binding);GO:0005524(ATP binding);GO:0005634(nucleus);GO:0005654(nucleoplasm);GO:0005694(chromosome);GO:0006259(DNA metaboli…	NA	K10737	EC:3.6.4.12	NA	minichromosome maintenance 8 homologous recombination repair factor [Source:HGNC Symbol;Acc:HGNC:16147]	protein_coding	NA	R-HSA-113638(Association of Cyclin B/Cdk1 with replicative origin inhibits pre-RC formation);R-HSA-169461(MCM8 mediated fork unwinding);R-HSA-176298(Activation of claspin);R-HSA-176318(Loading of claspin onto DNA during replication origin firing);R-HSA-68688(CDC6 association with ORC(1-6) at replication origins);R-HSA-68914(DNA polymerase alpha:primase binds at the origin);R-HSA-68916(DNA Replica…	0.613438	0.341692	0.612237	0.528814	0.598271	0.946187	0.827625	0.986868	0.955389	0.989686	0.706351	0.948385	1.19929	1.15138	0.366808	0.214425	0.279248	0.272549	0.364736	0.126498	0.225806	0.118669	0.150341	0.0454805	0.233886	0.292802	0.223869	0.175698	3.69016	1.88369	3.37515e-47	2.51124e-44	up	yes
ENSG00000128000	ZNF780B	163131	ENST00000434248;ENST00000221355;ENST00000594811;ENST00000593605;ENST00000598845	GO:0000978(RNA polymerase II cis-regulatory region sequence-specific DNA binding);GO:0001228(DNA-binding transcription activator activity, RNA polymerase II-specific);GO:0003677(DNA binding);GO:0005634(nucleus);GO:0006355(regulation of DNA-templated transcription);GO:0006357(regulation of transcription by RNA polymerase II);GO:0045944(positive regulation of transcription by RNA polymerase II);GO:…	05168(Herpes simplex virus 1 infection);05168(Herpes simplex virus 1 infection)	NA	NA	zf-C2H2	zinc finger protein 780B [Source:HGNC Symbol;Acc:HGNC:33109]	protein_coding;retained_intron	NA	NA	0.647269	0.498181	1.04661	0.613629	1.10413	1.04974	0.713819	1.21326	1.02085	0.931812	1.12949	1.08827	1.38557	1.88526	0.14179	0.130014	0.166709	0.347135	0.304529	0.124971	0.0979509	0.0485997	0.071542	0.0177849	0.22029	0.185525	0.263238	0.227435	6.10343	2.60962	4.19456e-47	3.06417e-44	up	yes
ENSG00000184205	TSPYL2	64061	ENST00000556808;ENST00000553557;ENST00000375442;ENST00000578306;ENST00000463525;ENST00000579390	GO:0000182(rDNA binding);GO:0000785(chromatin);GO:0003682(chromatin binding);GO:0005515(protein binding);GO:0005634(nucleus);GO:0005654(nucleoplasm);GO:0005730(nucleolus);GO:0005737(cytoplasm);GO:0006325(chromatin organization);GO:0006334(nucleosome assembly);GO:0007049(cell cycle);GO:0008156(negative regulation of DNA replication);GO:0009966(regulation of signal transduction);GO:0030308(negative…	NA	NA	NA	NA	TSPY like 2 [Source:HGNC Symbol;Acc:HGNC:24358]	retained_intron;protein_coding;nonsense_mediated_decay	NA	R-HSA-1791057(Expression of TSPYL2)	2.18748	1.65659	2.98079	1.83206	3.0853	4.32892	3.60004	4.78494	3.54506	3.95348	4.55652	4.57943	4.81075	4.06088	16.337	8.2943	9.36916	11.506	16.3772	10.7379	10.7952	6.08843	11.4067	3.80368	6.21432	14.8604	5.55749	17.6841	0.335245	-1.57671	1.06126e-46	7.61413e-44	down	yes
ENSG00000168066	SF1	7536,2516	ENST00000448404;ENST00000486960;ENST00000496969;ENST00000486867;ENST00000477596;ENST00000463343;ENST00000482693;ENST00000413725;ENST00000681407;ENST00000443908;ENST00000489544;ENST00000377390;ENST00000433274;ENST00000413951;ENST00000472725;ENST00000227503;ENST00000377387;ENST00000633899;ENST00000377394;ENST00000334944;ENST00000432725	GO:0000245(spliceosomal complex assembly);GO:0000389(mRNA 3'-splice site recognition);GO:0000398(mRNA splicing, via spliceosome);GO:0003676(nucleic acid binding);GO:0003714(transcription corepressor activity);GO:0003723(RNA binding);GO:0003729(mRNA binding);GO:0005515(protein binding);GO:0005634(nucleus);GO:0005654(nucleoplasm);GO:0005681(spliceosomal complex);GO:0005840(ribosome);GO:0006397(mRNA…	NA	NA	NA	NA	splicing factor 1 [Source:HGNC Symbol;Acc:HGNC:12950]	nonsense_mediated_decay;retained_intron;processed_transcript;protein_coding	NA	R-HSA-72107(Formation of the Spliceosomal E complex);R-HSA-72124(Formation of the Spliceosomal A Complex)	26.1763	20.5685	28.1273	19.1506	28.7615	48.1606	38.0183	42.2154	36.9927	37.569	54.2178	35.4071	40.0927	41.4202	71.8801	54.6644	84.1374	80.0986	96.4419	44.0554	59.5607	57.6853	58.3116	25.4377	76.3276	80.8828	63.1691	84.8954	0.529976	-0.916001	1.36591e-46	9.62801e-44	down	no
ENSG00000086827	ZW10	9183	ENST00000200135;ENST00000535142;ENST00000538209	GO:0000070(mitotic sister chromatid segregation);GO:0000132(establishment of mitotic spindle orientation);GO:0000278(mitotic cell cycle);GO:0000775(chromosome, centromeric region);GO:0000776(kinetochore);GO:0000922(spindle pole);GO:0005515(protein binding);GO:0005634(nucleus);GO:0005694(chromosome);GO:0005737(cytoplasm);GO:0005783(endoplasmic reticulum);GO:0005789(endoplasmic reticulum membrane);…	NA	NA	NA	NA	zw10 kinetochore protein [Source:HGNC Symbol;Acc:HGNC:13194]	protein_coding;nonsense_mediated_decay	NA	R-HSA-141409(Mad1 binds kinetochore);R-HSA-141422(MAD2 converted to an inhibitory state via interaction with Mad1);R-HSA-141431(MAD2 associates with the Mad1 kinetochore complex);R-HSA-141439(Release of activated MAD2 from kinetochores);R-HSA-1638803(Phosphorylation of cohesin by PLK1 at centromeres);R-HSA-1638821(PP2A-B56 dephosphorylates centromeric cohesin);R-HSA-2467809(ESPL1 (Separase) cleav…	1.19078	1.28237	2.25912	1.48454	1.91182	2.17861	1.82588	2.96548	3.12794	2.36932	2.98601	2.56394	4.47367	3.69545	0.641593	0.322414	0.787604	0.737377	0.756505	0.658397	0.626527	0.259537	0.343255	0.298591	0.733267	0.72108	0.651336	0.910812	4.06176	2.0221	5.17242e-46	3.58306e-43	up	yes
ENSG00000196843	ARID5A	10865	ENST00000470579;ENST00000497920;ENST00000467498;ENST00000412735;ENST00000357485;ENST00000454558;ENST00000673792	GO:0000122(negative regulation of transcription by RNA polymerase II);GO:0000976(transcription cis-regulatory region binding);GO:0002062(chondrocyte differentiation);GO:0002376(immune system process);GO:0003677(DNA binding);GO:0003682(chromatin binding);GO:0003714(transcription corepressor activity);GO:0003723(RNA binding);GO:0005515(protein binding);GO:0005634(nucleus);GO:0005654(nucleoplasm);GO…	NA	NA	NA	ARID	AT-rich interaction domain 5A [Source:HGNC Symbol;Acc:HGNC:17361]	retained_intron;nonsense_mediated_decay;protein_coding	NA	NA	16.1379	9.12166	10.7457	8.43764	12.6954	16.6298	13.962	20.8977	15.3875	12.2248	20.6006	14.1276	14.423	15.5217	54.0542	31.0121	54.832	50.338	58.9656	38.1213	59.952	36.1512	83.6395	19.56	42.3307	56.5222	31.7443	67.8942	0.293254	-1.76978	5.33794e-46	3.63505e-43	down	yes
ENSG00000184432	COPB2	9276	ENST00000503326;ENST00000507777;ENST00000512309;ENST00000677882;ENST00000333188;ENST00000514508;ENST00000504295;ENST00000512242;ENST00000510181;ENST00000677073;ENST00000502734;ENST00000512153;ENST00000513274;ENST00000677309;ENST00000510491	GO:0000139(Golgi membrane);GO:0005198(structural molecule activity);GO:0005515(protein binding);GO:0005737(cytoplasm);GO:0005789(endoplasmic reticulum membrane);GO:0005794(Golgi apparatus);GO:0005829(cytosol);GO:0006886(intracellular protein transport);GO:0006888(endoplasmic reticulum to Golgi vesicle-mediated transport);GO:0006890(retrograde vesicle-mediated transport, Golgi to endoplasmic retic…	NA	NA	NA	NA	COPI coat complex subunit beta 2 [Source:HGNC Symbol;Acc:HGNC:2232]	protein_coding;retained_intron;nonsense_mediated_decay;processed_transcript	NA	R-HSA-6807872(Active ARF recruits coatomer);R-HSA-6807875(ARFGAP, cargo, v-SNAREs and p24 proteins bind nascent COPI complex);R-HSA-6807877(ARFGAPs stimulate ARF GTPase activity);R-HSA-6809003(ERGIC-to-Golgi vesicles bind dynein:dynactin );R-HSA-6809006(Vesicle is tethered through binding GOLGA2:GORASP1, GOLGB1 and the COG complex);R-HSA-6809010(COPI vesicle uncoating);R-HSA-6809011(cis-Golgi t-S…	2.2962	1.85708	2.92987	2.41967	3.10629	3.76388	3.18112	4.76741	3.91879	4.22115	4.94894	3.33699	5.75208	5.65599	1.89982	0.600132	1.46534	1.8226	1.58074	0.752556	1.47206	0.498394	0.725849	0.305529	1.29607	1.5523	1.31302	1.75732	3.06046	1.61375	6.61913e-46	4.43239e-43	up	yes
ENSG00000117593	DARS2	55157	ENST00000647645;ENST00000647730;ENST00000649689;ENST00000649067;ENST00000650297;ENST00000648458;ENST00000647788;ENST00000648807;ENST00000648960;ENST00000648055;ENST00000648271;ENST00000649106	GO:0000049(tRNA binding);GO:0000166(nucleotide binding);GO:0003676(nucleic acid binding);GO:0004812(aminoacyl-tRNA ligase activity);GO:0004815(aspartate-tRNA ligase activity);GO:0005515(protein binding);GO:0005524(ATP binding);GO:0005654(nucleoplasm);GO:0005737(cytoplasm);GO:0005739(mitochondrion);GO:0005759(mitochondrial matrix);GO:0006412(translation);GO:0006418(tRNA aminoacylation for protein …	00970(Aminoacyl-tRNA biosynthesis);00970(Aminoacyl-tRNA biosynthesis)	K01876	EC:6.1.1.12	NA	aspartyl-tRNA synthetase 2, mitochondrial [Source:HGNC Symbol;Acc:HGNC:25538]	protein_coding;nonsense_mediated_decay;retained_intron	NA	R-HSA-380229(aspartate + tRNA(Asp) + ATP => Asp-tRNA(Asp) + AMP + pyrophosphate)	0.616211	0.447795	0.938002	0.680479	1.08355	1.0533	0.783601	0.909256	1.49211	1.69564	1.92796	1.44371	2.03428	1.92963	0.196194	0.18047	0.248304	0.31534	0.282609	0.103419	0.200427	0.110929	0.0737666	0.0174318	0.240275	0.302173	0.261935	0.189456	6.25678	2.64542	6.78437e-46	4.46857e-43	up	yes
ENSG00000164077	MON1A	84315	ENST00000296473;ENST00000486107;ENST00000473451;ENST00000455683;ENST00000642691;ENST00000483022;ENST00000417270;ENST00000645862	GO:0005085(guanyl-nucleotide exchange factor activity);GO:0005515(protein binding);GO:0005829(cytosol);GO:0006623(protein targeting to vacuole);GO:0009306(protein secretion);GO:0016192(vesicle-mediated transport);GO:0035658(Mon1-Ccz1 complex);GO:0050790(regulation of catalytic activity);GO:0050790(regulation of catalytic activity)	NA	NA	NA	NA	MON1 homolog A, secretory trafficking associated [Source:HGNC Symbol;Acc:HGNC:28207]	protein_coding;retained_intron;processed_transcript	NA	R-HSA-8877451(MON1:CCZ1 exchanges GTP for GDP on RAB7)	0.67573	0.46134	0.805903	0.477737	0.699517	0.762271	0.748575	1.02058	1.22461	1.14529	1.53317	1.19036	0.986552	1.07873	0.209059	0.159687	0.364927	0.232601	0.197163	0.117606	0.233366	0.0943005	0.262153	0.068575	0.161233	0.200872	0.174392	0.22652	4.74027	2.24497	7.67411e-46	4.97307e-43	up	yes
ENSG00000167604	NFKBID	84807	ENST00000590828;ENST00000586361;ENST00000396901;ENST00000588039;ENST00000641389;ENST00000588497;ENST00000585925;ENST00000591730;ENST00000585544;ENST00000590094;ENST00000606253	GO:0005515(protein binding);GO:0005634(nucleus);GO:0006954(inflammatory response);GO:0010468(regulation of gene expression);GO:0050852(T cell receptor signaling pathway);GO:2000321(positive regulation of T-helper 17 cell differentiation);GO:2000321(positive regulation of T-helper 17 cell differentiation)	NA	NA	NA	NA	NFKB inhibitor delta [Source:HGNC Symbol;Acc:HGNC:15671]	nonsense_mediated_decay;retained_intron;protein_coding;processed_transcript	NA	NA	2.5917	2.35557	2.93477	2.32375	2.9488	5.27393	3.38538	4.74357	2.69859	2.58544	2.73781	2.28242	3.68467	3.27699	34.5916	17.4817	20.0995	11.4644	14.4539	14.7797	11.8273	7.26506	18.0895	3.65964	9.00479	11.9552	15.1078	27.5751	0.201621	-2.31028	1.19597e-45	7.62725e-43	down	yes
ENSG00000170734	POLH	5429	ENST00000372236;ENST00000372226;ENST00000443535	GO:0000731(DNA synthesis involved in DNA repair);GO:0003677(DNA binding);GO:0003684(damaged DNA binding);GO:0003887(DNA-directed DNA polymerase activity);GO:0005515(protein binding);GO:0005634(nucleus);GO:0005654(nucleoplasm);GO:0005657(replication fork);GO:0005829(cytosol);GO:0006260(DNA replication);GO:0006281(DNA repair);GO:0006282(regulation of DNA repair);GO:0006290(pyrimidine dimer repair);…	01524(Platinum drug resistance);03460(Fanconi anemia pathway);03460(Fanconi anemia pathway)	K03509	EC:2.7.7.7	NA	DNA polymerase eta [Source:HGNC Symbol;Acc:HGNC:9181]	protein_coding	DOID:0050686(organ_system_cancer);DOID:0050687(cell_type_cancer);DOID:0060072(benign_neoplasm);DOID:0060085(organ_system_benign_neoplasm);DOID:0060121(integumentary_system_benign_neoplasm);DOID:0060122(integumentary_system_cancer);DOID:14566(disease_of_cellular_proliferation);DOID:162(cancer);DOID:1749(squamous_cell_carcinoma);DOID:1909(melanoma);DOID:305(carcinoma);DOID:3151(skin_squamous_cell_c…	R-HSA-110316(POLH binds monoUb:K164-PCNA at damaged TT-CPD-DNA template);R-HSA-110317(Insertion of correct bases opposite the lesion by POLH);R-HSA-110319(Elongation by POLH);R-HSA-5653754(UBE2L6:TRIM25 ISGylates monoUb:K164-PCNA);R-HSA-5653756(TRIM25 binds monoUb:164-PCNA);R-HSA-5653766(USP10 binds monoUb:K164,ISG:K164,ISG:K168-PCNA);R-HSA-5653770(USP10 deubiquitinates monoUb:K164,ISG:K164,ISG:K…	0.97133	0.734963	1.19653	0.742124	1.34946	1.26806	1.2788	1.83726	1.59625	1.73858	2.03294	1.49063	1.68829	2.48016	0.678699	0.423577	0.610179	0.488553	0.482773	0.278733	0.607328	0.217025	0.38726	0.103955	0.38208	0.556194	0.472585	0.639614	3.22434	1.689	1.31001e-45	8.224e-43	up	yes
ENSG00000145860	RNF145	153830	ENST00000521266;ENST00000611185;ENST00000518062;ENST00000519985;ENST00000424310;ENST00000518802;ENST00000521606;ENST00000518284;ENST00000519865;ENST00000274542;ENST00000520638;ENST00000520548	GO:0005783(endoplasmic reticulum);GO:0005789(endoplasmic reticulum membrane);GO:0008270(zinc ion binding);GO:0012505(endomembrane system);GO:0016020(membrane);GO:0016021(integral component of membrane);GO:0016567(protein ubiquitination);GO:0016740(transferase activity);GO:0046872(metal ion binding);GO:0061630(ubiquitin protein ligase activity);GO:0061630(ubiquitin protein ligase activity)	NA	K23789	EC:2.3.2.27	NA	ring finger protein 145 [Source:HGNC Symbol;Acc:HGNC:20853]	processed_transcript;protein_coding;retained_intron	NA	NA	11.9321	7.50279	10.6061	7.78353	11.9354	12.9928	11.7216	16.8387	13.7939	11.0386	17.8488	11.4817	21.1449	20.0401	7.10803	4.11365	6.79028	7.00713	7.06816	3.46829	6.24848	3.6256	4.61731	1.62713	5.3211	5.81852	5.70293	8.17792	2.43382	1.28322	1.42122e-45	8.78492e-43	up	yes
ENSG00000077380	DYNC1I2	1781	ENST00000409197;ENST00000409773;ENST00000508530;ENST00000340296;ENST00000397119;ENST00000445378;ENST00000470286;ENST00000471482;ENST00000409317;ENST00000479806;ENST00000482454;ENST00000476551;ENST00000422646;ENST00000409453;ENST00000452242;ENST00000410079;ENST00000435234;ENST00000443458;ENST00000425485;ENST00000430778	GO:0003777(microtubule motor activity);GO:0005515(protein binding);GO:0005737(cytoplasm);GO:0005813(centrosome);GO:0005829(cytosol);GO:0005856(cytoskeleton);GO:0005868(cytoplasmic dynein complex);GO:0005874(microtubule);GO:0007018(microtubule-based movement);GO:0010970(transport along microtubule);GO:0030286(dynein complex);GO:0031982(vesicle);GO:0045503(dynein light chain binding);GO:0045504(dyn…	04145(Phagosome);04962(Vasopressin-regulated water reabsorption);05132(Salmonella infection);05132(Salmonella infection)	NA	NA	NA	dynein cytoplasmic 1 intermediate chain 2 [Source:HGNC Symbol;Acc:HGNC:2964]	protein_coding;nonsense_mediated_decay;retained_intron	NA	R-HSA-141409(Mad1 binds kinetochore);R-HSA-141422(MAD2 converted to an inhibitory state via interaction with Mad1);R-HSA-141431(MAD2 associates with the Mad1 kinetochore complex);R-HSA-141439(Release of activated MAD2 from kinetochores);R-HSA-1638803(Phosphorylation of cohesin by PLK1 at centromeres);R-HSA-1638821(PP2A-B56 dephosphorylates centromeric cohesin);R-HSA-2213248(Transport of antigen l…	1.36984	1.47707	2.89609	2.70317	3.48955	3.7652	3.05641	4.23409	4.07484	3.46209	4.47651	3.49757	6.07993	4.81717	1.30591	0.667812	1.49116	1.47816	1.48603	0.628983	0.911267	0.493393	0.577913	0.240497	1.16838	1.42896	1.29062	1.4389	3.38168	1.75774	4.23411e-45	2.57755e-42	up	yes
ENSG00000135828	RNASEL	6041	ENST00000367559;ENST00000539397	GO:0000166(nucleotide binding);GO:0003723(RNA binding);GO:0004518(nuclease activity);GO:0004519(endonuclease activity);GO:0004521(endoribonuclease activity);GO:0004540(ribonuclease activity);GO:0004672(protein kinase activity);GO:0005515(protein binding);GO:0005524(ATP binding);GO:0005575(cellular_component);GO:0005737(cytoplasm);GO:0005739(mitochondrion);GO:0005759(mitochondrial matrix);GO:00058…	04621(NOD-like receptor signaling pathway);05160(Hepatitis C);05164(Influenza A);05168(Herpes simplex virus 1 infection);05168(Herpes simplex virus 1 infection)	NA	NA	NA	ribonuclease L [Source:HGNC Symbol;Acc:HGNC:10050]	protein_coding	DOID:0050117(disease_by_infectious_agent);DOID:0050177(monogenic_disease);DOID:0050686(organ_system_cancer);DOID:0050687(cell_type_cancer);DOID:0050736(autosomal_dominant_disease);DOID:0050739(autosomal_genetic_disease);DOID:10283(prostate_cancer);DOID:14566(disease_of_cellular_proliferation);DOID:162(cancer);DOID:170(endocrine_gland_cancer);DOID:1793(pancreatic_cancer);DOID:1883(hepatitis_C);DOI…	R-HSA-1015702(Expression of IFN-induced genes);R-HSA-5223305(ABCE1 binds RNASEL, inhibiting it);R-HSA-8985123(RNASEL binds 2'-5' oligoadenylate);R-HSA-8985201(ABCE1 binds RNASEL);R-HSA-9009936(RNASEL cleaves cellular ssRNA);R-HSA-9009941(RNASEL cleaves viral ssRNA)	3.3844	2.4352	3.88067	4.13808	3.96186	5.40548	5.71076	6.41978	6.01411	3.26061	7.12564	3.75849	6.83461	8.18128	1.3123	0.582077	1.6453	1.72658	1.05763	0.541675	1.50776	0.45948	0.538977	0.193168	1.50748	1.71511	1.18658	1.73225	4.48932	2.1665	1.01387e-44	6.07992e-42	up	yes
ENSG00000135446	CDK4	1019	ENST00000257904;ENST00000312990;ENST00000551706;ENST00000552713;ENST00000546489;ENST00000550419;ENST00000547853;ENST00000553237;ENST00000552254;ENST00000552862	GO:0000082(G1/S transition of mitotic cell cycle);GO:0000166(nucleotide binding);GO:0000307(cyclin-dependent protein kinase holoenzyme complex);GO:0000785(chromatin);GO:0004672(protein kinase activity);GO:0004674(protein serine/threonine kinase activity);GO:0004693(cyclin-dependent protein serine/threonine kinase activity);GO:0004712(protein serine/threonine/tyrosine kinase activity);GO:0005515(p…	01522(Endocrine resistance);04110(Cell cycle);04115(p53 signaling pathway);04151(PI3K-Akt signaling pathway);04218(Cellular senescence);04530(Tight junction);04660(T cell receptor signaling pathway);04933(AGE-RAGE signaling pathway in diabetic complications);04934(Cushing syndrome);05160(Hepatitis C);05162(Measles);05163(Human cytomegalovirus infection);05164(Influenza A);05165(Human papillomavir…	K02089	EC:2.7.11.22	NA	cyclin dependent kinase 4 [Source:HGNC Symbol;Acc:HGNC:1773]	protein_coding;retained_intron;nonsense_mediated_decay	DOID:0014667(disease_of_metabolism);DOID:0050013(carbohydrate_metabolism_disease);DOID:0050155(sensory_system_disease);DOID:0050686(organ_system_cancer);DOID:0050687(cell_type_cancer);DOID:0060072(benign_neoplasm);DOID:0060083(immune_system_cancer);DOID:0060084(cell_type_benign_neoplasm);DOID:0060100(musculoskeletal_system_cancer);DOID:0060116(sensory_system_cancer);DOID:0060158(acquired_metaboli…	R-HSA-1226094(Cyclin D:Cdk4/6 mediated phosphorylation of p130 (RBL2) and dissociation of phosphorylated p130 (RBL2) from DP1:E2F4/5 complex);R-HSA-1226095(Cyclin D:CDK4/6 mediated phosphorylation of p107 (RBL1) and dissociation of phosphorylated p107 (p-RBL1) from DP1:E2F4 complex);R-HSA-182594(Association of INK4 family proteins with CDK4/6);R-HSA-3215385(CDK4 in CCND1:CDK4:PRMT5:WDR77 phosphor…	4.44128	4.28707	4.44362	4.65859	5.11527	5.87694	6.22575	6.64249	8.99809	9.83334	5.86049	8.68504	9.70424	9.84833	1.94759	1.66033	2.27686	2.25761	2.12791	1.49492	1.47068	1.08176	1.00984	0.608287	1.41069	1.21346	2.11807	1.69101	4.22998	2.08065	1.48522e-44	8.77547e-42	up	yes
ENSG00000187994	RINL	126432	ENST00000591812;ENST00000593809;ENST00000602238;ENST00000599911;ENST00000598904;ENST00000596919;ENST00000593424;ENST00000596961;ENST00000589111;ENST00000598048	GO:0001726(ruffle);GO:0005085(guanyl-nucleotide exchange factor activity);GO:0005096(GTPase activator activity);GO:0005829(cytosol);GO:0006897(endocytosis);GO:0015031(protein transport);GO:0015629(actin cytoskeleton);GO:0016192(vesicle-mediated transport);GO:0030139(endocytic vesicle);GO:0031267(small GTPase binding);GO:0031410(cytoplasmic vesicle);GO:0042995(cell projection);GO:0050790(regulatio…	NA	NA	NA	NA	Ras and Rab interactor like [Source:HGNC Symbol;Acc:HGNC:24795]	protein_coding;processed_transcript;retained_intron	NA	R-HSA-8875320(RAB5 GEFs exchange GTP for GDP on RAB5)	3.82853	2.59275	3.95369	2.55792	4.31027	4.48564	4.95508	6.42843	5.38965	4.38308	5.63584	5.75843	8.55769	7.09633	2.04281	1.53925	2.63257	3.20172	2.23707	1.33011	1.94479	1.00774	1.48102	0.786353	2.08156	2.46606	2.14649	2.64439	2.53916	1.34435	1.65198e-44	9.61931e-42	up	yes
ENSG00000121742	GJB6	10804	ENST00000241124;ENST00000647029;ENST00000400065;ENST00000642251;ENST00000645654;ENST00000643211;ENST00000647243;ENST00000644283;ENST00000643121;ENST00000636852	GO:0003163(sinoatrial node development);GO:0005243(gap junction channel activity);GO:0005515(protein binding);GO:0005829(cytosol);GO:0005884(actin filament);GO:0005886(plasma membrane);GO:0005921(gap junction);GO:0005922(connexin complex);GO:0006915(apoptotic process);GO:0007154(cell communication);GO:0007267(cell-cell signaling);GO:0007568(aging);GO:0007605(sensory perception of sound);GO:000801…	NA	NA	NA	NA	gap junction protein beta 6 [Source:HGNC Symbol;Acc:HGNC:4288]	protein_coding	NA	R-HSA-190682(Connexin synthesis (generic))	0.0282841	0.0161248	0.0178425	0	0.0141479	0.0193407	0.0639773	0.0522964	0.0171827	0.0380326	0.0267396	0.017608	0.0282469	0.0593918	0.874281	0.47202	0.36412	0.706795	0.369245	0.47812	0.883809	0.433927	0.535023	0.151542	0.62815	1.7566	0.0519817	0.858563	0.0466145	-4.42308	1.73409e-44	9.9532e-42	down	yes
ENSG00000285816	ENSG00000285816		ENST00000649896	GO:0003677(DNA binding);GO:0005634(nucleus);GO:0006260(DNA replication)	NA	NA	NA	NA	novel protein, POLA2-CDC42EP2 readthrough	nonsense_mediated_decay	NA	NA	6.24693	5.66146	6.23811	5.56616	6.03042	5.68146	5.68681	5.61453	7.19972	5.06279	7.45029	4.52875	4.89134	3.56095	0.663396	0.562195	1.53279	0.855595	1.93462	0.515985	0.606139	0.330811	0.507271	0.158446	0.922806	1.47246	0.945865	1.06775	6.57659	2.71734	1.22381e-43	6.92538e-41	up	yes
ENSG00000133574	GIMAP4	55303	ENST00000255945;ENST00000461940;ENST00000478135;ENST00000479232;ENST00000494750	GO:0000166(nucleotide binding);GO:0005525(GTP binding);GO:0005737(cytoplasm);GO:0005829(cytosol);GO:0043231(intracellular membrane-bounded organelle);GO:0043231(intracellular membrane-bounded organelle)	NA	NA	NA	NA	GTPase, IMAP family member 4 [Source:HGNC Symbol;Acc:HGNC:21872]	protein_coding;processed_transcript	NA	NA	44.3411	67.9948	103.093	65.6397	78.3447	92.7333	83.2239	75.3283	104.235	60.433	172.265	74.7713	179.287	125.089	21.553	9.62177	30.0569	21.8517	19.2296	7.83636	19.8831	7.09903	9.04965	5.21269	22.004	27.8897	22.884	32.0817	5.17761	2.37229	1.36023e-43	7.59047e-41	up	yes
ENSG00000070423	RNF126	55658	ENST00000592626;ENST00000586749;ENST00000292363;ENST00000591394;ENST00000605891;ENST00000589762;ENST00000590885	GO:0005154(epidermal growth factor receptor binding);GO:0005515(protein binding);GO:0005634(nucleus);GO:0005654(nucleoplasm);GO:0005737(cytoplasm);GO:0005829(cytosol);GO:0006511(ubiquitin-dependent protein catabolic process);GO:0006513(protein monoubiquitination);GO:0016567(protein ubiquitination);GO:0016740(transferase activity);GO:0042059(negative regulation of epidermal growth factor receptor …	NA	K11982	EC:2.3.2.27	NA	ring finger protein 126 [Source:HGNC Symbol;Acc:HGNC:21151]	retained_intron;protein_coding;nonsense_mediated_decay;processed_transcript	NA	R-HSA-983140(Transfer of Ub from E2 to substrate and release of E2);R-HSA-983147(Release of E3 from polyubiquitinated substrate);R-HSA-983156(Polyubiquitination of substrate);R-HSA-983157(Interaction of E3 with substrate and E2-Ub complex)	5.53671	4.17483	6.75408	4.92699	6.57714	7.80103	8.25774	10.1901	9.10149	8.59362	10.605	9.89131	12.2311	11.0455	18.6602	12.8564	15.1073	21.0736	18.1369	13.0634	16.8051	11.7451	19.1923	7.12066	13.9357	16.9511	14.5329	25.0034	0.516034	-0.954462	1.42452e-43	7.84031e-41	down	no
ENSG00000113448	PDE4D	5144	ENST00000340635;ENST00000515011;ENST00000358923;ENST00000405755;ENST00000507116;ENST00000503258;ENST00000317118;ENST00000515835;ENST00000502575;ENST00000509368;ENST00000502484;ENST00000515324	GO:0002027(regulation of heart rate);GO:0004114(3',5'-cyclic-nucleotide phosphodiesterase activity);GO:0004115(3',5'-cyclic-AMP phosphodiesterase activity);GO:0005515(protein binding);GO:0005634(nucleus);GO:0005737(cytoplasm);GO:0005815(microtubule organizing center);GO:0005829(cytosol);GO:0005856(cytoskeleton);GO:0005886(plasma membrane);GO:0005891(voltage-gated calcium channel complex);GO:00061…	00230(Purine metabolism);01100(Metabolic pathways);04024(cAMP signaling pathway);04928(Parathyroid hormone synthesis, secretion and action);05032(Morphine addiction);05032(Morphine addiction)	K13293	EC:3.1.4.53	NA	phosphodiesterase 4D [Source:HGNC Symbol;Acc:HGNC:8783]	protein_coding;retained_intron;nonsense_mediated_decay;processed_transcript	DOID:0050161(lower_respiratory_tract_disease);DOID:0050686(organ_system_cancer);DOID:0050828(artery_disease);DOID:0060083(immune_system_cancer);DOID:1036(chronic_leukemia);DOID:1037(lymphoblastic_leukemia);DOID:1040(chronic_lymphocytic_leukemia);DOID:10763(hypertension);DOID:1240(leukemia);DOID:1287(cardiovascular_system_disease);DOID:14566(disease_of_cellular_proliferation);DOID:1579(respiratory…	R-HSA-111962(PDE4A,C,D hydrolyse cAMP);R-HSA-418553(cAMP degradation by Phosphodiesterases)	0.425581	0.205139	0.45872	0.260044	0.338304	0.900949	0.490068	0.679158	1.09629	0.86406	1.08025	0.958822	1.06868	0.844826	5.7386	2.94436	2.95869	4.48858	7.11563	2.11759	3.62964	1.04361	2.44451	0.536753	1.84249	4.73573	2.72093	4.16649	0.208049	-2.265	3.39948e-43	1.84574e-40	down	yes
ENSG00000183864	TOB2	10766	ENST00000327492;ENST00000434408	GO:0003714(transcription corepressor activity);GO:0005515(protein binding);GO:0005634(nucleus);GO:0005737(cytoplasm);GO:0005829(cytosol);GO:0007292(female gamete generation);GO:0008285(negative regulation of cell population proliferation);GO:0010468(regulation of gene expression);GO:0030316(osteoclast differentiation);GO:0042809(nuclear vitamin D receptor binding);GO:0045671(negative regulation o…	03018(RNA degradation);03018(RNA degradation)	NA	NA	NA	transducer of ERBB2, 2 [Source:HGNC Symbol;Acc:HGNC:11980]	protein_coding	NA	NA	5.02551	3.12704	5.86902	4.02333	6.08028	8.27511	7.28402	8.72332	7.67553	7.80789	12.4555	8.35919	11.4855	10.3727	3.10449	2.18444	3.03335	3.90112	3.27964	1.35559	2.23401	1.51325	1.54442	0.507621	3.60345	2.75374	2.89293	3.39491	3.01855	1.59386	4.0794e-43	2.18536e-40	up	yes
ENSG00000100221	JOSD1	9929	ENST00000216039;ENST00000490169;ENST00000456626;ENST00000462610;ENST00000482442;ENST00000683374;ENST00000417712;ENST00000545590;ENST00000427389	GO:0004843(cysteine-type deubiquitinase activity);GO:0005515(protein binding);GO:0005737(cytoplasm);GO:0005829(cytosol);GO:0005886(plasma membrane);GO:0006508(proteolysis);GO:0008233(peptidase activity);GO:0016020(membrane);GO:0016579(protein deubiquitination);GO:0016787(hydrolase activity);GO:0016787(hydrolase activity)	NA	K15235	EC:3.4.19.12	NA	Josephin domain containing 1 [Source:HGNC Symbol;Acc:HGNC:28953]	protein_coding;processed_transcript;retained_intron	NA	R-HSA-5688797(ATXN3 family cleave Ub chains)	5.29897	3.40965	4.96108	4.09499	5.67712	11.9103	7.57932	10.7276	7.61119	7.164	8.20417	7.39913	9.87376	9.58718	26.7694	12.8447	17.2971	21.7904	26.3696	11.4915	20.2944	10.2727	26.7919	4.55518	14.688	22.5837	15.6513	28.066	0.39889	-1.32594	5.3906e-43	2.84978e-40	down	yes
ENSG00000183287	CCBE1	147372	ENST00000650467;ENST00000649564;ENST00000439986;ENST00000589116;ENST00000695903;ENST00000695904	GO:0001525(angiogenesis);GO:0001945(lymph vessel development);GO:0001946(lymphangiogenesis);GO:0002020(protease binding);GO:0002040(sprouting angiogenesis);GO:0003016(respiratory system process);GO:0005509(calcium ion binding);GO:0005515(protein binding);GO:0005518(collagen binding);GO:0005576(extracellular region);GO:0005581(collagen trimer);GO:0005615(extracellular space);GO:0007585(respiratory…	NA	NA	NA	NA	collagen and calcium binding EGF domains 1 [Source:HGNC Symbol;Acc:HGNC:29426]	protein_coding;retained_intron;nonsense_mediated_decay	NA	NA	0.388101	0.35176	0.286684	0.444866	0.358847	0.419507	0.500526	0.503734	0.585049	0.648712	0.0125077	0.609407	0.646522	0.709398	0.0165297	0	0	0	0.00832064	0.00861531	0.0131524	0	0	0	0.00901244	0.00972056	0	0.0087495	87.2547	6.44716	7.53869e-43	3.93363e-40	up	yes
ENSG00000121486	TRMT1L	81627	ENST00000367506;ENST00000465827;ENST00000458395;ENST00000487028	GO:0000049(tRNA binding);GO:0002940(tRNA N2-guanine methylation);GO:0003723(RNA binding);GO:0004809(tRNA (guanine-N2-)-methyltransferase activity);GO:0005515(protein binding);GO:0005634(nucleus);GO:0007610(behavior);GO:0008033(tRNA processing);GO:0008168(methyltransferase activity);GO:0016740(transferase activity);GO:0030488(tRNA methylation);GO:0032259(methylation);GO:0046872(metal ion binding);…	NA	NA	NA	NA	tRNA methyltransferase 1 like [Source:HGNC Symbol;Acc:HGNC:16782]	protein_coding;processed_transcript	NA	NA	1.92729	1.89259	3.19104	2.27625	3.07503	3.02015	2.10218	3.8446	3.81451	2.92148	4.71648	3.28914	6.10418	5.8765	0.570397	0.460531	1.1365	1.06454	0.724829	0.365431	0.453152	0.165055	0.228489	0.301066	0.634846	1.0327	0.795592	0.767916	5.52249	2.46532	8.93981e-43	4.60492e-40	up	yes
ENSG00000112118	MCM3	4172	ENST00000596288;ENST00000421471;ENST00000616552;ENST00000476448;ENST00000229854;ENST00000419835	GO:0000166(nucleotide binding);GO:0000727(double-strand break repair via break-induced replication);GO:0000781(chromosome, telomeric region);GO:0003677(DNA binding);GO:0003678(DNA helicase activity);GO:0003697(single-stranded DNA binding);GO:0004386(helicase activity);GO:0005515(protein binding);GO:0005524(ATP binding);GO:0005634(nucleus);GO:0005654(nucleoplasm);GO:0005658(alpha DNA polymerase:pr…	03030(DNA replication);04110(Cell cycle);04110(Cell cycle)	K02541	EC:3.6.4.12	NA	minichromosome maintenance complex component 3 [Source:HGNC Symbol;Acc:HGNC:6945]	protein_coding;processed_transcript	DOID:0050177(monogenic_disease);DOID:0050686(organ_system_cancer);DOID:0050687(cell_type_cancer);DOID:0050737(autosomal_recessive_disease);DOID:0050739(autosomal_genetic_disease);DOID:12704(ataxia_telangiectasia);DOID:1319(brain_cancer);DOID:14566(disease_of_cellular_proliferation);DOID:162(cancer);DOID:170(endocrine_gland_cancer);DOID:171(neuroectodermal_tumor);DOID:1781(thyroid_cancer);DOID:299…	R-HSA-169468(MCM2-7 mediated fork unwinding);R-HSA-176298(Activation of claspin);R-HSA-176318(Loading of claspin onto DNA during replication origin firing);R-HSA-176942(Multiple proteins are localized at replication fork);R-HSA-68914(DNA polymerase alpha:primase binds at the origin);R-HSA-68916(DNA Replication Factor A (RPA) associates with the pre-replicative complex at the origin);R-HSA-68917(C…	5.74422	4.74118	6.63744	5.45644	8.41782	8.04704	6.75015	9.68326	14.1724	12.566	15.7802	11.1059	16.2742	19.3183	3.25735	2.23478	3.04456	3.33868	3.72372	2.48493	2.76688	1.29071	2.31036	0.906249	2.59652	2.28691	3.09666	3.44753	3.93343	1.97579	9.41451e-43	4.78805e-40	up	yes
ENSG00000165233	CARD19	84270	ENST00000488630;ENST00000468781;ENST00000466929;ENST00000495641;ENST00000498243;ENST00000375464;ENST00000475574;ENST00000490488;ENST00000466409	GO:0005634(nucleus);GO:0005739(mitochondrion);GO:0005783(endoplasmic reticulum);GO:0005789(endoplasmic reticulum membrane);GO:0005829(cytosol);GO:0016020(membrane);GO:0016021(integral component of membrane);GO:0031966(mitochondrial membrane);GO:0043124(negative regulation of I-kappaB kinase/NF-kappaB signaling);GO:0050700(CARD domain binding);GO:0050700(CARD domain binding)	NA	NA	NA	NA	caspase recruitment domain family member 19 [Source:HGNC Symbol;Acc:HGNC:28148]	processed_transcript;protein_coding;nonsense_mediated_decay	NA	NA	9.49876	6.57077	8.6885	7.08512	7.75876	14.4214	9.2312	12.4229	9.15287	6.25755	6.94277	8.13105	9.84127	8.08037	27.8235	21.2972	31.6828	37.0335	22.98	19.572	23.6079	21.9274	28.129	10.1645	33.2449	29.4538	24.5184	45.4313	0.32925	-1.60274	2.88657e-42	1.44971e-39	down	yes
ENSG00000104695	PPP2CB	5516	ENST00000221138;ENST00000518243;ENST00000518564;ENST00000523804;ENST00000518532;ENST00000520334;ENST00000523023;ENST00000522113;ENST00000520056	GO:0000159(protein phosphatase type 2A complex);GO:0000278(mitotic cell cycle);GO:0000775(chromosome, centromeric region);GO:0000922(spindle pole);GO:0004721(phosphoprotein phosphatase activity);GO:0004722(protein serine/threonine phosphatase activity);GO:0005515(protein binding);GO:0005634(nucleus);GO:0005694(chromosome);GO:0005737(cytoplasm);GO:0005829(cytosol);GO:0005856(cytoskeleton);GO:00064…	03015(mRNA surveillance pathway);04071(Sphingolipid signaling pathway);04114(Oocyte meiosis);04136(Autophagy - other);04140(Autophagy - animal);04151(PI3K-Akt signaling pathway);04152(AMPK signaling pathway);04261(Adrenergic signaling in cardiomyocytes);04350(TGF-beta signaling pathway);04390(Hippo signaling pathway);04530(Tight junction);04728(Dopaminergic synapse);04730(Long-term depression);05…	K04382	EC:3.1.3.16	NA	protein phosphatase 2 catalytic subunit beta [Source:HGNC Symbol;Acc:HGNC:9300]	protein_coding;retained_intron;nonsense_mediated_decay;processed_transcript	DOID:14566(disease_of_cellular_proliferation);DOID:162(cancer);DOID:2914(immune_system_disease);DOID:4(disease);DOID:612(primary_immunodeficiency_disease);DOID:7(disease_of_anatomical_entity)	R-HSA-113503(PP2A mediated localization of RB1 protein in chromatin);R-HSA-1295599(SPRY2 translocates to the plasma membrane);R-HSA-1295609(SRC phosphorylates SPRY2 on Y55 and Y227);R-HSA-1295613(SPRY2 binds GRB2);R-HSA-1295622(SPRY2 binds CBL);R-HSA-1295632(PPA2A dephosphorylates SPRY2);R-HSA-1363274(Dephosphorylation of p107 (RBL1) by PP2A);R-HSA-1363276(Dephosphorylation of p130 (RBL2) by PP2A…	1.90115	1.81466	2.57926	2.43414	3.02872	3.98524	2.90627	4.14604	3.75488	3.33198	4.63854	3.64868	5.31216	4.76573	1.67111	0.973976	1.56336	1.86465	1.54689	1.04284	1.35279	0.710312	0.847552	0.226171	1.81254	1.31143	1.49681	1.69116	2.6639	1.41354	3.80572e-42	1.88773e-39	up	yes
ENSG00000178966	RMI1	80010	ENST00000445877;ENST00000325875	GO:0000166(nucleotide binding);GO:0000712(resolution of meiotic recombination intermediates);GO:0000724(double-strand break repair via homologous recombination);GO:0002021(response to dietary excess);GO:0002023(reduction of food intake in response to dietary excess);GO:0005515(protein binding);GO:0005634(nucleus);GO:0005654(nucleoplasm);GO:0006260(DNA replication);GO:0009749(response to glucose);…	03460(Fanconi anemia pathway);03460(Fanconi anemia pathway)	NA	NA	NA	RecQ mediated genome instability 1 [Source:HGNC Symbol;Acc:HGNC:25764]	protein_coding	DOID:0050686(organ_system_cancer);DOID:0050687(cell_type_cancer);DOID:0060083(immune_system_cancer);DOID:1240(leukemia);DOID:14566(disease_of_cellular_proliferation);DOID:162(cancer);DOID:1909(melanoma);DOID:225(syndrome);DOID:2531(hematologic_cancer);DOID:4(disease);DOID:8692(myeloid_leukemia);DOID:9119(acute_myeloid_leukemia)	R-HSA-5684875(Binding of ATR:ATRIP to RPA at resected DNA DSBs);R-HSA-5684882(CHEK1 is recruited to resected DNA DSBs);R-HSA-5684887(Activation of CHEK1 at resected DNA DSBs);R-HSA-5685011(ATR activation at DNA DSBs);R-HSA-5685156(ATR phosphorylates RPA2);R-HSA-5685341(BCDX2 complex stabilizes RAD51 filament);R-HSA-5685838(CX3 complex binds D-loop structures);R-HSA-5685985(EXO1 or DNA2 in complex…	2.02892	1.49768	2.36669	1.65069	2.22	2.08237	2.59682	3.25388	2.679	2.52967	1.9908	2.21175	4.47355	4.08912	0.425945	0.079001	0.514132	0.748822	0.715881	0.270347	0.682043	0.194938	0.126197	0.075366	0.567064	0.502676	0.463418	0.510247	6.07054	2.60182	4.06406e-42	1.99129e-39	up	yes
ENSG00000181523	SGSH	6448	ENST00000575282;ENST00000571675;ENST00000575188;ENST00000571075;ENST00000570427;ENST00000570923;ENST00000571156;ENST00000576856;ENST00000326317;ENST00000572208;ENST00000571051;ENST00000572257;ENST00000573150;ENST00000576941;ENST00000576707;ENST00000575484	GO:0005515(protein binding);GO:0005539(glycosaminoglycan binding);GO:0005764(lysosome);GO:0006027(glycosaminoglycan catabolic process);GO:0008449(N-acetylglucosamine-6-sulfatase activity);GO:0008484(sulfuric ester hydrolase activity);GO:0016250(N-sulfoglucosamine sulfohydrolase activity);GO:0016787(hydrolase activity);GO:0030200(heparan sulfate proteoglycan catabolic process);GO:0043202(lysosomal…	00531(Glycosaminoglycan degradation);01100(Metabolic pathways);04142(Lysosome);04142(Lysosome)	K01565	EC:3.10.1.1	NA	N-sulfoglucosamine sulfohydrolase [Source:HGNC Symbol;Acc:HGNC:10818]	retained_intron;protein_coding;processed_transcript;nonsense_mediated_decay	DOID:0014667(disease_of_metabolism);DOID:12798(mucopolysaccharidosis);DOID:12801(mucopolysaccharidosis_III);DOID:225(syndrome);DOID:3211(lysosomal_storage_disease);DOID:4(disease);DOID:655(inherited_metabolic_disorder)	R-HSA-1678708(SGSH hydrolyses Heparan sulfate chain(2));R-HSA-2090043(SGSH hydrolyses Heparan sulfate chain(7));R-HSA-2263444(Defective SGSH does not hydrolyse Heparan sulfate chain(7));R-HSA-9036050(Defective SGSH does not hydrolyse Heparan sulfate chain(2))	3.64744	2.14872	4.06618	2.32868	3.72936	4.71421	4.59972	6.2568	4.13615	4.73492	4.46738	4.62782	5.34824	6.81172	9.39737	7.06604	7.27044	10.0412	8.95213	4.96733	7.60014	5.74845	5.8282	2.35454	7.84445	7.8361	6.71028	10.2555	0.60485	-0.725351	4.70206e-42	2.23922e-39	down	no
ENSG00000197798	FAM118B	79607	ENST00000533050;ENST00000531935;ENST00000627851;ENST00000528985;ENST00000360194;ENST00000527247;ENST00000525338	GO:0005515(protein binding);GO:0005634(nucleus);GO:0015030(Cajal body);GO:0030576(Cajal body organization);GO:0042802(identical protein binding);GO:0042802(identical protein binding)	NA	NA	NA	NA	family with sequence similarity 118 member B [Source:HGNC Symbol;Acc:HGNC:26110]	protein_coding;retained_intron	NA	NA	0.838177	0.694235	1.31111	1.16973	1.64704	1.37631	0.991724	2.25559	2.19799	1.58143	2.5721	1.79749	2.06879	2.85876	0.523062	0.243787	0.45343	0.469306	0.643825	0.269886	0.550787	0.155526	0.278945	0.0884718	0.29161	0.416379	0.379812	0.709629	4.26718	2.09328	4.72582e-42	2.23922e-39	up	yes
ENSG00000151914	DST	667	ENST00000680361;ENST00000421834;ENST00000370765;ENST00000520144;ENST00000466429;ENST00000482156;ENST00000340834;ENST00000244364;ENST00000651289;ENST00000651941;ENST00000523967;ENST00000459869;ENST00000651457;ENST00000492944;ENST00000523943;ENST00000517840;ENST00000520645;ENST00000518464;ENST00000312431;ENST00000487754;ENST00000652573;ENST00000523292;ENST00000524302;ENST00000524186;ENST00000521104…	GO:0003779(actin binding);GO:0005178(integrin binding);GO:0005198(structural molecule activity);GO:0005509(calcium ion binding);GO:0005515(protein binding);GO:0005604(basement membrane);GO:0005634(nucleus);GO:0005635(nuclear envelope);GO:0005654(nucleoplasm);GO:0005737(cytoplasm);GO:0005783(endoplasmic reticulum);GO:0005789(endoplasmic reticulum membrane);GO:0005829(cytosol);GO:0005856(cytoskelet…	NA	NA	NA	NA	dystonin [Source:HGNC Symbol;Acc:HGNC:1090]	protein_coding;retained_intron	DOID:0050687(cell_type_cancer);DOID:14566(disease_of_cellular_proliferation);DOID:162(cancer);DOID:16(integumentary_system_disease);DOID:1909(melanoma);DOID:2730(epidermolysis_bullosa);DOID:2731(vesiculobullous_skin_disease);DOID:37(skin_disease);DOID:4644(epidermolysis_bullosa_simplex);DOID:4(disease);DOID:7(disease_of_anatomical_entity)	R-HSA-2213192(Hemidesmosome formation);R-HSA-432956(BP230 is recruited to the hemidesmosome);R-HSA-446077(BP230 interacts with keretin K5/K14);R-HSA-446083(CD151 interacts with BP180 and the integrin alpha 6 subunit);R-HSA-9018766(RHOU binds effectors at the plasma membrane);R-HSA-9018794(RHOV binds effectors at the plasma membrane);R-HSA-9696266(RND2 binds effectors);R-HSA-9696268(RND3 binds eff…	0.386988	0.373815	0.344368	0.384387	0.392374	0.432726	0.428872	0.420612	0.474904	0.531597	0.0968227	0.467467	0.487841	0.553032	0.0727414	0.0512362	0.0803301	0.0737681	0.0751789	0.0495762	0.0602976	0.0254012	0.0230207	0.0102437	0.0512823	0.0810413	0.0858741	0.0909814	6.95065	2.79715	4.73727e-42	2.23922e-39	up	yes
ENSG00000117519	CNN3	1266	ENST00000370206;ENST00000394202;ENST00000487539;ENST00000461018	GO:0003779(actin binding);GO:0005515(protein binding);GO:0005516(calmodulin binding);GO:0005829(cytosol);GO:0005856(cytoskeleton);GO:0005912(adherens junction);GO:0005925(focal adhesion);GO:0015629(actin cytoskeleton);GO:0030855(epithelial cell differentiation);GO:0031032(actomyosin structure organization);GO:0098609(cell-cell adhesion);GO:0098641(cadherin binding involved in cell-cell adhesion);…	NA	NA	NA	NA	calponin 3 [Source:HGNC Symbol;Acc:HGNC:2157]	protein_coding;processed_transcript	NA	NA	3.68525	4.30616	2.81248	4.18093	3.75189	4.06174	3.97455	3.70977	4.6307	5.68734	0.37117	5.33174	4.90138	5.83667	0.351857	0.361692	0.421952	0.243864	0.269563	0.0593106	0.195854	0.0839802	0.340686	0.130353	0.3576	0.343916	0.100041	0.334455	15.9221	3.99295	8.07268e-42	3.77144e-39	up	yes
ENSG00000100100	PIK3IP1	113791	ENST00000480654;ENST00000441972;ENST00000402249;ENST00000215912;ENST00000493034;ENST00000443175	GO:0005515(protein binding);GO:0005886(plasma membrane);GO:0014067(negative regulation of phosphatidylinositol 3-kinase signaling);GO:0016020(membrane);GO:0016021(integral component of membrane);GO:0036313(phosphatidylinositol 3-kinase catalytic subunit binding);GO:0043553(negative regulation of phosphatidylinositol 3-kinase activity);GO:0043553(negative regulation of phosphatidylinositol 3-kinas…	NA	NA	NA	NA	phosphoinositide-3-kinase interacting protein 1 [Source:HGNC Symbol;Acc:HGNC:24942]	retained_intron;protein_coding	NA	NA	14.2148	6.59902	11.901	7.06113	13.036	20.7594	20.1122	22.7207	17.8937	19.32	23.2933	25.532	22.5551	29.828	83.2005	46.1831	52.6092	60.2504	115.049	51.7763	88.2608	43.3031	65.3457	9.88299	39.9778	71.9158	40.7119	95.9488	0.294796	-1.76221	8.9891e-42	4.15131e-39	down	yes
ENSG00000161509	GRIN2C	2905	ENST00000293190;ENST00000584176;ENST00000584496;ENST00000347612	GO:0004970(ionotropic glutamate receptor activity);GO:0004972(NMDA glutamate receptor activity);GO:0005216(ion channel activity);GO:0005261(cation channel activity);GO:0005515(protein binding);GO:0005789(endoplasmic reticulum membrane);GO:0005886(plasma membrane);GO:0005887(integral component of plasma membrane);GO:0006811(ion transport);GO:0007215(glutamate receptor signaling pathway);GO:0007420…	04020(Calcium signaling pathway);04024(cAMP signaling pathway);04080(Neuroactive ligand-receptor interaction);04713(Circadian entrainment);04720(Long-term potentiation);04724(Glutamatergic synapse);05010(Alzheimer disease);05014(Amyotrophic lateral sclerosis);05017(Spinocerebellar ataxia);05020(Prion disease);05022(Pathways of neurodegeneration - multiple diseases);05030(Cocaine addiction);05031(…	NA	NA	NA	glutamate ionotropic receptor NMDA type subunit 2C [Source:HGNC Symbol;Acc:HGNC:4587]	protein_coding;retained_intron	NA	R-HSA-432162(Unblocking of GRIN1:GRIN2 NMDA receptors);R-HSA-432164(Ca2+ influx into the post-synaptic cell);R-HSA-432172(Glycine and glutamate ligands bind GRIN1:GRIN2 NMDA receptor);R-HSA-6794336(NMDAR binds PSD-95 subfamily members);R-HSA-6794349(NMDA receptor complex:DLG2,DLG3,DLG4 binds SPAR);R-HSA-6794354(NMDA receptor complex:DLG2,DLG3,DLG4:SPAR binds PDLIM5);R-HSA-6794356(BEGAIN binds DLG…	0.0348211	0.0369512	0.0297198	0.0255545	0.107171	0.121406	0.0876027	0.0818681	0.0424797	0.0747507	0.0709409	0.0997322	0.117065	0.0857384	0.621275	0.301855	0.401223	0.321566	0.475472	0.227418	0.552823	0.412028	0.136596	0.198002	0.45173	0.355942	0.449909	0.486052	0.188394	-2.40817	1.06148e-41	4.84636e-39	down	yes
ENSG00000128591	FLNC	2318	ENST00000325888;ENST00000346177;ENST00000388853	GO:0003779(actin binding);GO:0005515(protein binding);GO:0005737(cytoplasm);GO:0005829(cytosol);GO:0005856(cytoskeleton);GO:0005886(plasma membrane);GO:0005925(focal adhesion);GO:0007010(cytoskeleton organization);GO:0008092(cytoskeletal protein binding);GO:0016020(membrane);GO:0030018(Z disc);GO:0030036(actin cytoskeleton organization);GO:0030506(ankyrin binding);GO:0042383(sarcolemma);GO:004280…	04010(MAPK signaling pathway);04510(Focal adhesion);05132(Salmonella infection);05205(Proteoglycans in cancer);05205(Proteoglycans in cancer)	NA	NA	NA	filamin C [Source:HGNC Symbol;Acc:HGNC:3756]	protein_coding;retained_intron	DOID:0080000(muscular_disease);DOID:17(musculoskeletal_system_disease);DOID:423(myopathy);DOID:4(disease);DOID:66(muscle_tissue_disease);DOID:7(disease_of_anatomical_entity)	R-HSA-430347(MigFilin associates with Filamin and F-actin)	2.55685	2.64734	2.31136	2.83606	2.31965	2.3492	2.52097	2.71307	1.89493	2.22938	0.0774886	2.13747	2.45166	2.46539	0.0709553	0.0902089	0.0704385	0.0772768	0.0839913	0.0837022	0.0827528	0.012739	0.0543471	0.0457534	0.0413041	0.0475345	0	0.108303	36.2482	5.17984	1.90326e-41	8.59203e-39	up	yes
ENSG00000132646	PCNA	5111	ENST00000379143;ENST00000379160	GO:0000122(negative regulation of transcription by RNA polymerase II);GO:0000307(cyclin-dependent protein kinase holoenzyme complex);GO:0000701(purine-specific mismatch base pair DNA N-glycosylase activity);GO:0000781(chromosome, telomeric region);GO:0000785(chromatin);GO:0001673(male germ cell nucleus);GO:0003677(DNA binding);GO:0003682(chromatin binding);GO:0003684(damaged DNA binding);GO:00055…	03030(DNA replication);03410(Base excision repair);03420(Nucleotide excision repair);03430(Mismatch repair);04110(Cell cycle);04530(Tight junction);05161(Hepatitis B);05161(Hepatitis B)	NA	NA	NA	proliferating cell nuclear antigen [Source:HGNC Symbol;Acc:HGNC:8729]	protein_coding	DOID:0050117(disease_by_infectious_agent);DOID:0050155(sensory_system_disease);DOID:0050161(lower_respiratory_tract_disease);DOID:0050177(monogenic_disease);DOID:0050615(respiratory_system_cancer);DOID:0050622(reproductive_organ_benign_neoplasm);DOID:0050686(organ_system_cancer);DOID:0050687(cell_type_cancer);DOID:0050736(autosomal_dominant_disease);DOID:0050739(autosomal_genetic_disease);DOID:00…	R-HSA-110307(REV1 binds AP-dsDNA);R-HSA-110308(REV1 inserts dCMP opposite to AP sites in DNA);R-HSA-110311(POLZ extends translesion synthesis);R-HSA-110316(POLH binds monoUb:K164-PCNA at damaged TT-CPD-DNA template);R-HSA-110317(Insertion of correct bases opposite the lesion by POLH);R-HSA-110319(Elongation by POLH);R-HSA-110363(FEN1 bound to PCNA and APEX1 cleaves flap ssDNA);R-HSA-110364(PCNA:P…	14.6282	15.8765	16.6793	15.3888	20.7871	18.5443	16.7641	26.3768	35.2835	30.4843	21.7488	25.7002	39.3211	38.9269	6.06681	3.16752	8.36914	7.30992	7.25935	6.8576	5.17817	1.65772	4.33617	1.86114	4.9828	5.24822	5.68666	7.79294	4.44096	2.15087	2.04279e-41	9.11945e-39	up	yes
ENSG00000112511	PHF1	5252	ENST00000486845;ENST00000488767;ENST00000374516;ENST00000479029;ENST00000495509;ENST00000487667;ENST00000427826;ENST00000428274;ENST00000374512;ENST00000459809;ENST00000427004	GO:0001222(transcription corepressor binding);GO:0003677(DNA binding);GO:0003682(chromatin binding);GO:0005515(protein binding);GO:0005634(nucleus);GO:0005654(nucleoplasm);GO:0005737(cytoplasm);GO:0005813(centrosome);GO:0005815(microtubule organizing center);GO:0005856(cytoskeleton);GO:0006325(chromatin organization);GO:0006355(regulation of DNA-templated transcription);GO:0006974(cellular respon…	NA	NA	NA	NA	PHD finger protein 1 [Source:HGNC Symbol;Acc:HGNC:8919]	retained_intron;protein_coding;nonsense_mediated_decay	NA	R-HSA-212252(Polycomb Repressive Complex 2 (PRC2) Is recruited to chromatin);R-HSA-212263(PRC2 trimethylates histone H3 at lysine-27)	11.3723	7.14103	11.8474	6.84916	10.0806	14.225	14.7253	16.2056	11.9057	11.4452	14.448	13.3073	14.3906	13.238	38.8519	27.3213	35.8227	35.1034	29.5152	27.9016	26.8486	21.6348	35.2479	11.822	25.5294	29.1116	18.9366	45.3111	0.418579	-1.25643	2.43454e-41	1.07489e-38	down	yes
ENSG00000134824	FADS2	9415,5913	ENST00000278840;ENST00000522359;ENST00000257261;ENST00000517312;ENST00000543584;ENST00000522056;ENST00000523235;ENST00000517839;ENST00000355484;ENST00000522639;ENST00000518606;ENST00000520145;ENST00000574708;ENST00000521571;ENST00000521849	GO:0004768(stearoyl-CoA 9-desaturase activity);GO:0005515(protein binding);GO:0005783(endoplasmic reticulum);GO:0005789(endoplasmic reticulum membrane);GO:0005887(integral component of plasma membrane);GO:0006629(lipid metabolic process);GO:0006631(fatty acid metabolic process);GO:0006633(fatty acid biosynthetic process);GO:0006636(unsaturated fatty acid biosynthetic process);GO:0008610(lipid bio…	00592(alpha-Linolenic acid metabolism);01040(Biosynthesis of unsaturated fatty acids);01100(Metabolic pathways);01212(Fatty acid metabolism);03320(PPAR signaling pathway);03320(PPAR signaling pathway)	K10226	EC:1.14.19.3	NA	fatty acid desaturase 2 [Source:HGNC Symbol;Acc:HGNC:3575]	protein_coding;retained_intron;processed_transcript	DOID:0014667(disease_of_metabolism);DOID:0050013(carbohydrate_metabolism_disease);DOID:0050828(artery_disease);DOID:0060158(acquired_metabolic_disease);DOID:1287(cardiovascular_system_disease);DOID:14566(disease_of_cellular_proliferation);DOID:162(cancer);DOID:178(vascular_disease);DOID:225(syndrome);DOID:3393(coronary_artery_disease);DOID:4194(glucose_metabolism_disease);DOID:4(disease);DOID:584…	R-HSA-2046084(Desaturation of alpha-linoleoyl-CoA to Stearidonoyl-CoA);R-HSA-2046096(Desaturation of Linoleoyl-CoA to gamma-linolenoyl-CoA);R-HSA-2046097(Desaturation of tetracosatetraenoyl-CoA to tetracosapentaenoyl-CoA);R-HSA-2046099(Desaturation of tetracosapentaenoyl-CoA to tetracosahexaenoyl-CoA)	1.78628	1.91067	1.62111	2.43088	2.38135	2.03104	2.03604	2.14644	2.71989	2.11707	1.86137	2.213	2.22287	3.02848	0.367403	0.435251	0.608648	0.466253	0.582409	0.169988	0.310713	0.335846	0.254344	0.226749	0.303954	0.596705	0.424522	0.478724	5.48529	2.45557	2.49564e-41	1.08989e-38	up	yes
ENSG00000152117	SMPD4BP	150776	ENST00000438378;ENST00000692700;ENST00000685161;ENST00000685795;ENST00000415574;ENST00000687223	NA	NA	NA	NA	NA	sphingomyelin phosphodiesterase 4B, pseudogene [Source:HGNC Symbol;Acc:HGNC:24761]	processed_transcript;transcribed_processed_pseudogene	NA	NA	2.02011	1.325	2.32799	1.73102	2.15691	2.54377	2.39835	2.94	3.03667	2.62089	3.13521	2.44114	2.9232	2.9201	6.52305	4.63008	5.13496	6.6786	6.48165	4.15107	5.14761	4.28259	5.57468	1.80952	3.68597	5.07234	4.2207	6.21029	0.49596	-1.0117	4.02003e-41	1.73674e-38	down	yes
ENSG00000138459	SLC35A5	55032	ENST00000492406;ENST00000261034;ENST00000484995;ENST00000494706;ENST00000460713;ENST00000468642;ENST00000460615	GO:0000139(Golgi membrane);GO:0005515(protein binding);GO:0008643(carbohydrate transport);GO:0015165(pyrimidine nucleotide-sugar transmembrane transporter activity);GO:0016020(membrane);GO:0016021(integral component of membrane);GO:0030173(integral component of Golgi membrane);GO:0090481(pyrimidine nucleotide-sugar transmembrane transport);GO:0090481(pyrimidine nucleotide-sugar transmembrane tran…	NA	NA	NA	NA	solute carrier family 35 member A5 [Source:HGNC Symbol;Acc:HGNC:20792]	protein_coding;processed_transcript;retained_intron	NA	NA	2.65264	2.50611	3.31818	2.97497	3.61604	4.60493	3.89302	5.0612	4.18721	3.35178	3.99628	2.371	5.44879	5.04312	1.51026	0.715515	1.73011	1.53036	1.05109	0.613919	0.949839	0.605888	0.622865	0.305313	1.90345	1.32449	1.13358	1.46338	3.42983	1.77814	4.32466e-41	1.84847e-38	up	yes
ENSG00000253200	ENSG00000253200		ENST00000521025	NA	NA	NA	NA	NA	novel transcript, antisense to KIAA1967	lncRNA	NA	NA	1.01539	0.991716	1.44646	0.916982	0.76861	2.32059	1.5901	2.37634	1.56705	1.39581	1.58845	1.13872	1.91586	2.21004	4.65525	3.38052	4.83429	4.99728	5.41033	2.30778	3.34498	2.28293	3.39234	0.57978	3.95877	6.16912	3.73294	5.30313	0.390843	-1.35534	5.63305e-41	2.38237e-38	down	yes
ENSG00000116560	SFPQ	6421,654780	ENST00000468598;ENST00000485365;ENST00000490668;ENST00000466213;ENST00000471991;ENST00000485454;ENST00000466745;ENST00000460428;ENST00000357214;ENST00000696553;ENST00000470472	GO:0000122(negative regulation of transcription by RNA polymerase II);GO:0000380(alternative mRNA splicing, via spliceosome);GO:0000724(double-strand break repair via homologous recombination);GO:0000785(chromatin);GO:0000976(transcription cis-regulatory region binding);GO:0002218(activation of innate immune response);GO:0002376(immune system process);GO:0003676(nucleic acid binding);GO:0003677(D…	NA	NA	NA	Others	splicing factor proline and glutamine rich [Source:HGNC Symbol;Acc:HGNC:10774]	processed_transcript;nonsense_mediated_decay;protein_coding	DOID:0050686(organ_system_cancer);DOID:14566(disease_of_cellular_proliferation);DOID:162(cancer);DOID:2237(hepatitis);DOID:263(kidney_cancer);DOID:3118(hepatobiliary_disease);DOID:3996(urinary_system_cancer);DOID:409(liver_disease);DOID:4450(renal_cell_carcinoma);DOID:4451(renal_carcinoma);DOID:4465(papillary_renal_cell_carcinoma);DOID:4(disease);DOID:77(gastrointestinal_system_disease);DOID:7(di…	R-HSA-8849463(PTK6 phosphorylates SFPQ);R-HSA-9635446(Rv3654c binds SFPQ)	8.776	8.83781	15.5407	10.2902	15.4893	22.0996	15.9202	20.8551	20.2811	19.9335	21.311	17.7689	25.1447	24.8473	36.9169	22.9071	35.5843	33.9077	40.8864	19.3011	25.1647	15.0814	20.3446	6.79727	25.43	38.2157	25.0482	35.461	0.648465	-0.624899	6.05955e-41	2.53605e-38	down	no
ENSG00000131747	TOP2A	7153	ENST00000423485;ENST00000578412;ENST00000577706	GO:0000166(nucleotide binding);GO:0000228(nuclear chromosome);GO:0000287(magnesium ion binding);GO:0000712(resolution of meiotic recombination intermediates);GO:0000775(chromosome, centromeric region);GO:0000793(condensed chromosome);GO:0000819(sister chromatid segregation);GO:0001673(male germ cell nucleus);GO:0002244(hematopoietic progenitor cell differentiation);GO:0003677(DNA binding);GO:0003…	01524(Platinum drug resistance);01524(Platinum drug resistance)	K03164	EC:5.6.2.2	NA	DNA topoisomerase II alpha [Source:HGNC Symbol;Acc:HGNC:11989]	protein_coding;retained_intron	DOID:0050177(monogenic_disease);DOID:0050615(respiratory_system_cancer);DOID:0050686(organ_system_cancer);DOID:0050687(cell_type_cancer);DOID:0050736(autosomal_dominant_disease);DOID:0050739(autosomal_genetic_disease);DOID:0060072(benign_neoplasm);DOID:0060083(immune_system_cancer);DOID:0060084(cell_type_benign_neoplasm);DOID:0060100(musculoskeletal_system_cancer);DOID:1037(lymphoblastic_leukemia…	R-HSA-4641342(SUMOylation of TOP2A with SUMO1);R-HSA-4641350(PIAS4 SUMOylates TOP2A with SUMO2,3);R-HSA-5228525(RANBP2 SUMOylates TOP2A with SUMO1);R-HSA-8964531(TOP2A gene gene expression is repressed by the DREAM complex)	2.87615	2.84645	2.0895	3.28767	3.15987	2.88778	2.76991	3.31172	5.724	7.40955	1.49137	5.78232	7.42315	6.80291	0.42822	0.333244	0.705019	0.663361	0.421188	0.482283	0.417895	0.0623966	0.322771	0.235863	0.348359	0.330677	0.396961	0.391177	10.4456	3.38482	6.64952e-41	2.74576e-38	up	yes
ENSG00000141219	C17orf80	55028	ENST00000535032;ENST00000582391;ENST00000577615;ENST00000268942;ENST00000255557;ENST00000359042;ENST00000426147	GO:0003674(molecular_function);GO:0005515(protein binding);GO:0008150(biological_process);GO:0016020(membrane);GO:0016021(integral component of membrane);GO:0070062(extracellular exosome);GO:0070062(extracellular exosome)	NA	NA	NA	NA	chromosome 17 open reading frame 80 [Source:HGNC Symbol;Acc:HGNC:29601]	protein_coding	NA	NA	1.22733	0.967605	1.51272	1.35069	1.36827	1.72623	1.90964	2.37536	1.85123	1.70849	2.18684	1.92765	2.85113	2.64083	0.694175	0.385782	0.468801	0.723217	0.486132	0.391544	0.920611	0.198192	0.334127	0.0875065	0.433979	0.44785	0.451028	0.433148	3.96587	1.98764	6.69732e-41	2.74576e-38	up	yes
ENSG00000127452	FBXL12	54850	ENST00000589626;ENST00000592067;ENST00000591009;ENST00000586651;ENST00000247977;ENST00000586073;ENST00000590808;ENST00000592732;ENST00000585379;ENST00000589438;ENST00000586469;ENST00000588922	GO:0000086(G2/M transition of mitotic cell cycle);GO:0005515(protein binding);GO:0005634(nucleus);GO:0005829(cytosol);GO:0016567(protein ubiquitination);GO:0019005(SCF ubiquitin ligase complex);GO:0031146(SCF-dependent proteasomal ubiquitin-dependent protein catabolic process);GO:0043153(entrainment of circadian clock by photoperiod);GO:0051726(regulation of cell cycle);GO:0051726(regulation of c…	NA	NA	NA	NA	F-box and leucine rich repeat protein 12 [Source:HGNC Symbol;Acc:HGNC:13611]	protein_coding;nonsense_mediated_decay	NA	R-HSA-8952618(AcM-UBE2M transfers NEDD8 to CRL1 E3 ubiquitin ligase complex);R-HSA-8952620(NEDD8:AcM-UBE2M binds CRL1 E3 ubiquitin ligase complex);R-HSA-8955241(CAND1 binds cytosolic CRL E3 ubiquitin ligases);R-HSA-8955289(COMMDs displace CAND1 from cytosolic CRL E3 ubiquitin ligase complexes);R-HSA-8956040(COP9 signalosome deneddylates cytosolic CRL E3 ubiquitin ligase complexes);R-HSA-8956200(M…	2.32401	1.58488	2.42144	1.90304	2.60925	4.00108	3.74687	4.69627	4.0635	3.42127	4.65387	3.12751	4.90376	4.57369	4.99689	4.61616	6.74824	7.90872	6.17983	4.53721	5.3983	3.97518	4.51645	1.49751	5.96838	6.46789	5.39923	7.47658	0.634597	-0.656088	7.97081e-41	3.23486e-38	down	no
ENSG00000156970	BUB1B	701	ENST00000287598;ENST00000558972;ENST00000559461;ENST00000557848;ENST00000559772;ENST00000412359;ENST00000560120;ENST00000558715;ENST00000558151;ENST00000559414	GO:0000166(nucleotide binding);GO:0000775(chromosome, centromeric region);GO:0000776(kinetochore);GO:0000940(outer kinetochore);GO:0004672(protein kinase activity);GO:0004674(protein serine/threonine kinase activity);GO:0004712(protein serine/threonine/tyrosine kinase activity);GO:0005515(protein binding);GO:0005524(ATP binding);GO:0005634(nucleus);GO:0005680(anaphase-promoting complex);GO:000569…	04110(Cell cycle);05166(Human T-cell leukemia virus 1 infection);05166(Human T-cell leukemia virus 1 infection)	K06637	EC:2.7.11.1	NA	BUB1 mitotic checkpoint serine/threonine kinase B [Source:HGNC Symbol;Acc:HGNC:1149]	protein_coding;retained_intron;processed_transcript;nonsense_mediated_decay	DOID:0050686(organ_system_cancer);DOID:0050687(cell_type_cancer);DOID:0060100(musculoskeletal_system_cancer);DOID:10283(prostate_cancer);DOID:10286(prostate_carcinoma);DOID:14566(disease_of_cellular_proliferation);DOID:1612(breast_cancer);DOID:162(cancer);DOID:1749(squamous_cell_carcinoma);DOID:193(reproductive_organ_cancer);DOID:225(syndrome);DOID:305(carcinoma);DOID:3246(embryonal_rhabdomyosarc…	R-HSA-141409(Mad1 binds kinetochore);R-HSA-141422(MAD2 converted to an inhibitory state via interaction with Mad1);R-HSA-141423(Binding of the MCC complex to the APC/C complex);R-HSA-141431(MAD2 associates with the Mad1 kinetochore complex);R-HSA-141437(Formation of the MCC complex);R-HSA-141439(Release of activated MAD2 from kinetochores);R-HSA-1638803(Phosphorylation of cohesin by PLK1 at centr…	0.900441	0.798975	0.639613	0.830071	0.786341	0.750657	0.851485	0.988768	1.78696	2.25323	0.522574	1.66422	2.22175	2.04182	0.197194	0.0470656	0.111676	0.179482	0.17578	0.151668	0.108315	0.0617318	0.0643838	0.0680872	0.0630759	0.124368	0.0610695	0.169066	10.7627	3.42796	8.73506e-41	3.50957e-38	up	yes
ENSG00000143570	SLC39A1	27173	ENST00000356205;ENST00000537590;ENST00000310483;ENST00000368621;ENST00000621013;ENST00000368623;ENST00000417348;ENST00000461071	GO:0001701(in utero embryonic development);GO:0005102(signaling receptor binding);GO:0005385(zinc ion transmembrane transporter activity);GO:0005515(protein binding);GO:0005783(endoplasmic reticulum);GO:0005789(endoplasmic reticulum membrane);GO:0005886(plasma membrane);GO:0006811(ion transport);GO:0006812(cation transport);GO:0006829(zinc ion transport);GO:0016020(membrane);GO:0016021(integral c…	NA	NA	NA	NA	solute carrier family 39 member 1 [Source:HGNC Symbol;Acc:HGNC:12876]	protein_coding;processed_transcript	DOID:14566(disease_of_cellular_proliferation);DOID:162(cancer);DOID:4(disease)	R-HSA-442422(SLC39A1-4 transports Zn2+ from extracellular region to cytosol)	10.2655	9.88521	11.7752	9.74235	12.4315	12.3063	13.917	14.9857	15.795	12.3231	17.2965	13.7921	16.6945	16.1087	6.78228	3.72127	6.52122	5.43505	5.26186	2.72288	5.01368	2.70048	3.72432	1.66737	5.60808	4.08615	6.3114	7.21641	2.80533	1.48817	1.07559e-40	4.27871e-38	up	yes
ENSG00000183340	JRKL	8690	ENST00000332349;ENST00000546177	GO:0003676(nucleic acid binding);GO:0003677(DNA binding);GO:0005634(nucleus);GO:0007417(central nervous system development);GO:0007417(central nervous system development)	NA	NA	NA	NA	JRK like [Source:HGNC Symbol;Acc:HGNC:6200]	protein_coding;processed_transcript	NA	NA	0.991199	0.420195	1.19767	1.08585	1.18781	0.889161	0.997875	1.55993	1.59905	1.2743	1.64708	1.37869	2.49976	2.24437	0.251855	0.27908	0.278681	0.377835	0.43511	0.131361	0.216698	0.115205	0.0584205	0.0620683	0.337146	0.363071	0.238143	0.419154	5.32375	2.41244	1.27878e-40	5.03714e-38	up	yes
ENSG00000160223	ICOSLG	23308	ENST00000643466;ENST00000407780;ENST00000400379;ENST00000700361;ENST00000344330;ENST00000700354;ENST00000700353;ENST00000700358;ENST00000400377;ENST00000700351;ENST00000700355;ENST00000700350;ENST00000700359;ENST00000700357;ENST00000700356	GO:0001817(regulation of cytokine production);GO:0002250(adaptive immune response);GO:0002376(immune system process);GO:0005102(signaling receptor binding);GO:0005515(protein binding);GO:0005886(plasma membrane);GO:0006952(defense response);GO:0006972(hyperosmotic response);GO:0007165(signal transduction);GO:0009897(external side of plasma membrane);GO:0016020(membrane);GO:0016021(integral compon…	04514(Cell adhesion molecules);04672(Intestinal immune network for IgA production);04672(Intestinal immune network for IgA production)	NA	NA	NA	inducible T cell costimulator ligand [Source:HGNC Symbol;Acc:HGNC:17087]	protein_coding;retained_intron;nonsense_mediated_decay	DOID:0050686(organ_system_cancer);DOID:0050687(cell_type_cancer);DOID:0060083(immune_system_cancer);DOID:10952(nephritis);DOID:1240(leukemia);DOID:14566(disease_of_cellular_proliferation);DOID:162(cancer);DOID:18(urinary_system_disease);DOID:1909(melanoma);DOID:2531(hematologic_cancer);DOID:4(disease);DOID:557(kidney_disease);DOID:7(disease_of_anatomical_entity)	R-HSA-388817(ICOS binds ICOSL/B7-H2);R-HSA-388830(PI3K binds ICOS)	0.203445	0.134158	0.34023	0.120658	0.207862	0.25744	0.362254	0.367956	0.314833	0.313955	0.378226	0.263156	0.304166	0.379103	1.34829	0.686043	0.730504	0.65236	1.30637	0.700063	1.04376	0.497802	1.10381	0.216322	0.671041	1.05787	1.26773	0.885741	0.324419	-1.62407	1.30302e-40	5.08279e-38	down	yes
ENSG00000214517	PPME1	51400	ENST00000328257;ENST00000539021;ENST00000538501;ENST00000543525;ENST00000398427;ENST00000541340;ENST00000542710;ENST00000535205;ENST00000544401	GO:0000086(G2/M transition of mitotic cell cycle);GO:0004864(protein phosphatase inhibitor activity);GO:0005515(protein binding);GO:0005654(nucleoplasm);GO:0006468(protein phosphorylation);GO:0006482(protein demethylation);GO:0016787(hydrolase activity);GO:0019888(protein phosphatase regulator activity);GO:0019901(protein kinase binding);GO:0019903(protein phosphatase binding);GO:0043086(negative…	NA	K13617	EC:3.1.1.89	NA	protein phosphatase methylesterase 1 [Source:HGNC Symbol;Acc:HGNC:30178]	protein_coding;retained_intron;processed_transcript	DOID:14566(disease_of_cellular_proliferation);DOID:162(cancer);DOID:4(disease)	R-HSA-8856951(PP2A demethylation by PPME1)	1.9519	1.90398	2.01019	2.0662	2.60881	2.382	2.38697	2.79994	2.31172	2.59421	1.83834	2.5335	2.84279	3.1531	0.636798	0.635559	0.837812	0.77348	0.962624	0.375655	0.745904	0.460082	0.615306	0.299056	0.880288	0.910119	0.716706	0.673438	3.50564	1.80968	1.48798e-40	5.74849e-38	up	yes
ENSG00000113552	GNPDA1	10007	ENST00000311337;ENST00000500692;ENST00000508177;ENST00000505689;ENST00000507107;ENST00000504139;ENST00000507559;ENST00000503794;ENST00000515747;ENST00000513454;ENST00000504424;ENST00000510194	GO:0004342(glucosamine-6-phosphate deaminase activity);GO:0005515(protein binding);GO:0005737(cytoplasm);GO:0005829(cytosol);GO:0005975(carbohydrate metabolic process);GO:0006043(glucosamine catabolic process);GO:0006044(N-acetylglucosamine metabolic process);GO:0006046(N-acetylglucosamine catabolic process);GO:0006048(UDP-N-acetylglucosamine biosynthetic process);GO:0006091(generation of precurs…	00520(Amino sugar and nucleotide sugar metabolism);01100(Metabolic pathways);01100(Metabolic pathways)	K02564	EC:3.5.99.6	NA	glucosamine-6-phosphate deaminase 1 [Source:HGNC Symbol;Acc:HGNC:4417]	protein_coding;retained_intron	NA	R-HSA-6799604(GNPDA1,2 hexamers deaminate GlcN6P to Fru(6)P)	2.356	1.66428	2.73406	2.55157	3.38533	3.40829	3.40285	4.10106	4.51664	3.75874	5.38794	3.76509	5.02121	4.55584	1.22847	1.06319	1.72035	1.7338	2.01205	0.865626	1.1812	0.632568	0.961862	0.375657	1.55129	1.64541	1.8218	1.27279	2.80132	1.48611	2.14976e-40	8.22602e-38	up	yes
ENSG00000155827	RNF20	56254	ENST00000389120;ENST00000481046;ENST00000374819;ENST00000478072;ENST00000466817	GO:0000151(ubiquitin ligase complex);GO:0000209(protein polyubiquitination);GO:0002039(p53 binding);GO:0003682(chromatin binding);GO:0003713(transcription coactivator activity);GO:0003730(mRNA 3'-UTR binding);GO:0004842(ubiquitin-protein transferase activity);GO:0005515(protein binding);GO:0005634(nucleus);GO:0005654(nucleoplasm);GO:0005730(nucleolus);GO:0006325(chromatin organization);GO:0006355…	NA	K10696	EC:2.3.2.27	NA	ring finger protein 20 [Source:HGNC Symbol;Acc:HGNC:10062]	protein_coding;processed_transcript;retained_intron	NA	R-HSA-8942099(RNF20:RNF40 binds PAF complex, Ubiquitin:UBE2A,B (Ubiquitin:RAD6), WAC and Histone H2B);R-HSA-8942101(RNF20:RNF40 monoubiquitinates Histone H2B);R-HSA-9018778(RHOBTB1 binds interacting proteins at the endosome membrane)	3.96941	3.89762	6.2531	4.78692	7.1423	7.90002	7.10787	9.08789	8.30977	6.2977	11.3878	7.12592	11.5963	10.6893	3.29109	2.40232	3.79731	3.31388	3.45285	1.73101	2.84831	1.07872	1.57111	0.625174	3.19575	4.233	2.93682	3.53206	2.777	1.47352	2.35601e-40	8.93018e-38	up	yes
ENSG00000270681	ENSG00000270681		ENST00000603472	NA	NA	NA	NA	NA	novel transcript, antisense to SH3D19	lncRNA	NA	NA	0.216307	0.133738	0.137034	0.150222	0.244817	0.192144	0.263885	0.340254	0.400985	0	0.169789	0.137975	0.168568	0.348616	3.34769	1.44247	2.46314	1.63335	1.12552	2.08861	2.1951	1.13091	2.77596	0.562596	1.5045	1.94053	0.85531	2.23765	0.114781	-3.12305	2.42732e-40	9.11449e-38	down	yes
ENSG00000163444	TMEM183A	92703	ENST00000463015;ENST00000488097;ENST00000367242;ENST00000468449;ENST00000543891	GO:0005515(protein binding);GO:0016020(membrane);GO:0016021(integral component of membrane);GO:0019005(SCF ubiquitin ligase complex);GO:0031647(regulation of protein stability);GO:0031647(regulation of protein stability)	NA	NA	NA	NA	transmembrane protein 183A [Source:HGNC Symbol;Acc:HGNC:20173]	retained_intron;protein_coding;processed_transcript	NA	NA	5.98258	4.14473	6.71016	5.56958	7.92099	9.37633	8.70906	11.0873	9.91334	9.52835	9.8164	9.08793	12.6073	11.4752	14.6734	9.13595	14.5655	16.0926	13.6255	10.0132	12.652	7.93279	12.0735	3.10641	12.123	15.2159	10.7824	17.2434	0.720471	-0.472988	2.45125e-40	9.11911e-38	down	no
ENSG00000104824	HNRNPL	3191	ENST00000597731;ENST00000600741;ENST00000601813;ENST00000595164;ENST00000647557;ENST00000600233;ENST00000388749;ENST00000595443;ENST00000601047;ENST00000221419;ENST00000601664;ENST00000595804	GO:0000381(regulation of alternative mRNA splicing, via spliceosome);GO:0000785(chromatin);GO:0000976(transcription cis-regulatory region binding);GO:0003676(nucleic acid binding);GO:0003723(RNA binding);GO:0003729(mRNA binding);GO:0003730(mRNA 3'-UTR binding);GO:0005515(protein binding);GO:0005634(nucleus);GO:0005654(nucleoplasm);GO:0005737(cytoplasm);GO:0005829(cytosol);GO:0006396(RNA processin…	NA	NA	NA	NA	heterogeneous nuclear ribonucleoprotein L [Source:HGNC Symbol;Acc:HGNC:5045]	retained_intron;protein_coding;nonsense_mediated_decay	NA	R-HSA-156661(Formation of Exon Junction Complex);R-HSA-72103(Formation of pre-mRNPs);R-HSA-72107(Formation of the Spliceosomal E complex);R-HSA-72124(Formation of the Spliceosomal A Complex);R-HSA-72127(Formation of the Spliceosomal B Complex);R-HSA-72130(Formation of an intermediate Spliceosomal C complex);R-HSA-72139(Formation of the active Spliceosomal C complex);R-HSA-72143(Lariat Formation a…	10.1187	7.40471	13.0034	9.00814	14.1684	21.8431	16.5618	19.9055	20.1901	20.8141	25.7989	17.7643	25.2085	24.138	35.0095	21.3042	32.3392	36.9772	35.1213	21.8968	29.1561	19.3421	27.5644	8.06282	29.0799	32.5986	23.7884	39.3423	0.628035	-0.671084	4.82765e-40	1.7795e-37	down	no
ENSG00000050405	LIMA1	51474	ENST00000552783;ENST00000552491;ENST00000552823;ENST00000341247;ENST00000394943;ENST00000549064;ENST00000552909;ENST00000551486;ENST00000547825;ENST00000552720;ENST00000551691;ENST00000552045	GO:0001725(stress fiber);GO:0001726(ruffle);GO:0003779(actin binding);GO:0003785(actin monomer binding);GO:0005515(protein binding);GO:0005737(cytoplasm);GO:0005829(cytosol);GO:0005856(cytoskeleton);GO:0005886(plasma membrane);GO:0005903(brush border);GO:0005925(focal adhesion);GO:0006629(lipid metabolic process);GO:0008202(steroid metabolic process);GO:0008203(cholesterol metabolic process);GO:0…	NA	NA	NA	NA	LIM domain and actin binding 1 [Source:HGNC Symbol;Acc:HGNC:24636]	protein_coding;retained_intron;nonsense_mediated_decay	DOID:14566(disease_of_cellular_proliferation);DOID:162(cancer);DOID:4(disease)	NA	0.743428	0.961594	1.26013	1.10718	1.37469	1.39506	1.56575	1.64091	2.84347	2.87769	1.47339	2.78935	4.92899	4.858	0.429405	0.158616	0.515991	0.363677	0.264201	0.159942	0.266989	0.118568	0.191066	0.1166	0.326779	0.504244	0.353084	0.43655	7.09026	2.82584	6.70826e-40	2.45022e-37	up	yes
ENSG00000139874	SSTR1	6751	ENST00000267377	GO:0004930(G protein-coupled receptor activity);GO:0004994(somatostatin receptor activity);GO:0005515(protein binding);GO:0005737(cytoplasm);GO:0005886(plasma membrane);GO:0005887(integral component of plasma membrane);GO:0007165(signal transduction);GO:0007186(G protein-coupled receptor signaling pathway);GO:0007187(G protein-coupled receptor signaling pathway, coupled to cyclic nucleotide secon…	04024(cAMP signaling pathway);04080(Neuroactive ligand-receptor interaction);04935(Growth hormone synthesis, secretion and action)	NA	NA	NA	somatostatin receptor 1 [Source:HGNC Symbol;Acc:HGNC:11330]	protein_coding	DOID:0050686(organ_system_cancer);DOID:0060072(benign_neoplasm);DOID:0060084(cell_type_benign_neoplasm);DOID:0060085(organ_system_benign_neoplasm);DOID:0060089(endocrine_organ_benign_neoplasm);DOID:14566(disease_of_cellular_proliferation);DOID:162(cancer);DOID:170(endocrine_gland_cancer);DOID:1781(thyroid_cancer);DOID:3829(pituitary_adenoma);DOID:3962(follicular_thyroid_carcinoma);DOID:3963(thyro…	R-HSA-374758(Somatostatin receptors bind somatostatin and cortistatin);R-HSA-380073(Liganded Gi-activating GPCR acts as a GEF for Gi);R-HSA-749454(The Ligand:GPCR:Gi complex dissociates);R-HSA-749456(Liganded Gi-activating GPCRs bind inactive heterotrimeric G-protein Gi)	0.944249	0.840365	0.801929	0.879749	0.744823	0.854925	0.922855	1.04604	0.743831	0.883182	0	0.902152	0.846373	1.08025	0	0	0	0	0	0	0	0	0	0	0	0	0	0	8207.66	13.0028	9.12734e-40	3.30377e-37	up	yes
ENSG00000215912	TTC34	100287898	ENST00000401095	GO:0005515(protein binding)	NA	NA	NA	NA	tetratricopeptide repeat domain 34 [Source:HGNC Symbol;Acc:HGNC:34297]	protein_coding	NA	NA	0.024511	0.035876	0.042354	0.013019	0.015324	0.081113	0.060131	0.044649	0.028161	0.019765	0.036727	0.057461	0.054874	0.057184	0.283584	0.269965	0.221237	0.347776	0.480337	0.156439	0.187975	0.255677	0.10431	0.068211	0.211801	0.243825	0.179576	0.271979	0.173988	-2.52294	1.33843e-39	4.80138e-37	down	yes
ENSG00000109971	HSPA8	3312	ENST00000534624;ENST00000528292;ENST00000227378;ENST00000532780;ENST00000534319;ENST00000526686;ENST00000527983;ENST00000532167;ENST00000532636;ENST00000453788;ENST00000532091;ENST00000531063;ENST00000524552;ENST00000530391;ENST00000532182;ENST00000526862;ENST00000527387;ENST00000534567;ENST00000524590;ENST00000525624	GO:0000166(nucleotide binding);GO:0000398(mRNA splicing, via spliceosome);GO:0000974(Prp19 complex);GO:0001664(G protein-coupled receptor binding);GO:0001786(phosphatidylserine binding);GO:0003723(RNA binding);GO:0005515(protein binding);GO:0005524(ATP binding);GO:0005576(extracellular region);GO:0005615(extracellular space);GO:0005634(nucleus);GO:0005654(nucleoplasm);GO:0005681(spliceosomal comp…	03040(Spliceosome);04010(MAPK signaling pathway);04141(Protein processing in endoplasmic reticulum);04144(Endocytosis);04213(Longevity regulating pathway - multiple species);04612(Antigen processing and presentation);04915(Estrogen signaling pathway);05020(Prion disease);05134(Legionellosis);05145(Toxoplasmosis);05162(Measles);05162(Measles)	NA	NA	NA	heat shock protein family A (Hsp70) member 8 [Source:HGNC Symbol;Acc:HGNC:5241]	protein_coding;retained_intron;processed_transcript	NA	R-HSA-156661(Formation of Exon Junction Complex);R-HSA-3371422(ATP hydrolysis by HSP70);R-HSA-3371467(SIRT1 deacetylates HSF1);R-HSA-3371503(STIP1(HOP) binds HSP90 and HSP70:HSP40:nascent protein);R-HSA-3371518(SIRT1 binds to HSF1);R-HSA-3371554(HSF1 acetylation at Lys80);R-HSA-3371590(HSP70 binds to HSP40:nascent protein);R-HSA-421836(trans-Golgi Network Derived Vesicle Uncoating);R-HSA-432688(t…	50.6384	53.9659	72.4461	79.7585	95.6581	98.4585	80.3018	103.764	144.687	100.338	154.888	113.694	157.598	148.51	40.1513	24.0794	43.9863	43.3396	51.5092	25.9202	34.827	16.7727	37.952	12.0171	31.973	41.0046	39.0822	48.0035	2.96505	1.56806	1.58267e-39	5.6273e-37	up	yes
ENSG00000162813	BPNT1	10380	ENST00000322067;ENST00000463953;ENST00000414869;ENST00000548668;ENST00000354807;ENST00000544404;ENST00000498237;ENST00000498791;ENST00000482136;ENST00000469520;ENST00000480959	GO:0005829(cytosol);GO:0006139(nucleobase-containing compound metabolic process);GO:0007399(nervous system development);GO:0008441(3'(2'),5'-bisphosphate nucleotidase activity);GO:0016787(hydrolase activity);GO:0046854(phosphatidylinositol phosphate biosynthetic process);GO:0046855(inositol phosphate dephosphorylation);GO:0046872(metal ion binding);GO:0050427(3'-phosphoadenosine 5'-phosphosulfate…	00920(Sulfur metabolism);01100(Metabolic pathways);01100(Metabolic pathways)	K01082	EC:3.1.3.7	NA	3'(2'), 5'-bisphosphate nucleotidase 1 [Source:HGNC Symbol;Acc:HGNC:1096]	protein_coding;retained_intron;processed_transcript	NA	R-HSA-176606(Adenosine 3',5'-bisphosphate (PAP) + H2O => AMP + orthophosphate)	0.766505	1.34421	1.55893	1.30974	1.99192	2.25851	2.20041	3.33769	3.25315	3.41819	2.46325	2.65337	4.24461	4.29275	0.730757	0.500264	0.702198	0.702545	0.652829	0.488102	0.630603	0.152001	0.452493	0.114289	0.59369	0.396921	0.500171	0.664208	4.81979	2.26897	2.06869e-39	7.29085e-37	up	yes
ENSG00000186866	POFUT2	23275	ENST00000460932;ENST00000493524;ENST00000612472;ENST00000468360;ENST00000331343;ENST00000476653;ENST00000471540;ENST00000334538;ENST00000349485;ENST00000615172;ENST00000485190;ENST00000463917;ENST00000451615;ENST00000493811	GO:0001707(mesoderm formation);GO:0005783(endoplasmic reticulum);GO:0005789(endoplasmic reticulum membrane);GO:0005794(Golgi apparatus);GO:0005975(carbohydrate metabolic process);GO:0006004(fucose metabolic process);GO:0006486(protein glycosylation);GO:0008417(fucosyltransferase activity);GO:0010468(regulation of gene expression);GO:0010717(regulation of epithelial to mesenchymal transition);GO:0…	00514(Other types of O-glycan biosynthesis);00514(Other types of O-glycan biosynthesis)	K03691	EC:2.4.1.221	NA	protein O-fucosyltransferase 2 [Source:HGNC Symbol;Acc:HGNC:14683]	processed_transcript;protein_coding;nonsense_mediated_decay	NA	R-HSA-5173192(POFUT2 transfers fucose to TSR domain-containing proteins)	2.02792	1.68701	2.93302	1.20575	2.72529	3.81986	2.96281	3.15445	2.94399	2.10604	2.35013	2.88381	3.0451	2.80081	7.08192	5.24638	7.00925	8.15258	7.85435	5.30728	5.14322	5.55155	6.82073	1.64243	6.49829	6.77967	4.35344	8.99355	0.423973	-1.23795	2.77794e-39	9.70541e-37	down	yes
ENSG00000198554	WDHD1	11169	ENST00000360586;ENST00000475379;ENST00000455555;ENST00000420358;ENST00000567693	GO:0000278(mitotic cell cycle);GO:0003677(DNA binding);GO:0003682(chromatin binding);GO:0005515(protein binding);GO:0005634(nucleus);GO:0005654(nucleoplasm);GO:0005737(cytoplasm);GO:0006261(DNA-templated DNA replication);GO:0006281(DNA repair);GO:0043229(intracellular organelle);GO:0043596(nuclear replication fork);GO:0043596(nuclear replication fork)	NA	NA	NA	HMG	WD repeat and HMG-box DNA binding protein 1 [Source:HGNC Symbol;Acc:HGNC:23170]	protein_coding;retained_intron;nonsense_mediated_decay	NA	NA	0.463554	0.524796	0.514641	0.793398	0.562207	0.490822	0.63819	0.64072	0.932644	0.743836	0.523346	0.750046	1.24836	1.19245	0.103571	0.0912982	0.141615	0.138059	0.153543	0.0489909	0.14541	0.00924265	0.101616	0.0350791	0.154085	0.163838	0.154756	0.166081	6.23389	2.64013	6.04286e-39	2.09302e-36	up	yes
ENSG00000172086	KRCC1	51315	ENST00000347055	GO:0005515(protein binding)	NA	NA	NA	NA	lysine rich coiled-coil 1 [Source:HGNC Symbol;Acc:HGNC:28039]	protein_coding	NA	NA	5.68041	3.85852	7.21433	5.44889	6.83033	8.08957	6.78798	14.4092	8.26123	4.55396	6.27733	7.51213	14.8004	12.0472	1.5205	1.35872	2.68573	3.24568	2.29501	1.87899	1.81397	0.641075	1.51765	0.829727	2.33796	2.30967	1.8642	2.46467	4.17626	2.06221	9.16799e-39	3.1483e-36	up	yes
ENSG00000270060	ENSG00000270060		ENST00000524412	NA	NA	NA	NA	NA	novel transcript	lncRNA	NA	NA	1.57439	1.27216	2.2712	0.819652	0.891719	1.90909	2.53456	2.07587	1.44081	1.1946	1.21108	1.77551	1.68255	1.96439	7.58441	4.75636	6.00003	8.22572	7.85433	4.73929	4.395	4.56083	4.29634	1.01438	4.99299	6.20984	5.23741	7.12191	0.293777	-1.76721	1.01845e-38	3.46774e-36	down	yes
ENSG00000135069	PSAT1	29968	ENST00000376588;ENST00000347159	GO:0003824(catalytic activity);GO:0004648(O-phospho-L-serine:2-oxoglutarate aminotransferase activity);GO:0005515(protein binding);GO:0005737(cytoplasm);GO:0005829(cytosol);GO:0006564(L-serine biosynthetic process);GO:0008483(transaminase activity);GO:0008615(pyridoxine biosynthetic process);GO:0008652(cellular amino acid biosynthetic process);GO:0016740(transferase activity);GO:0030170(pyridoxal…	00260(Glycine, serine and threonine metabolism);00270(Cysteine and methionine metabolism);00750(Vitamin B6 metabolism);01100(Metabolic pathways);01200(Carbon metabolism);01230(Biosynthesis of amino acids);01240(Biosynthesis of cofactors);01240(Biosynthesis of cofactors)	K00831	EC:2.6.1.52	NA	phosphoserine aminotransferase 1 [Source:HGNC Symbol;Acc:HGNC:19129]	protein_coding	DOID:14566(disease_of_cellular_proliferation);DOID:150(disease_of_mental_health);DOID:1561(cognitive_disorder);DOID:162(cancer);DOID:2468(psychotic_disorder);DOID:4(disease);DOID:5419(schizophrenia)	R-HSA-977333(PXLP-K200-PSAT1 dimer transfers amino group from L-Glu to 3POPA)	1.53858	1.32738	1.22709	1.35756	1.58356	1.5165	1.61717	2.28557	3.76578	6.16354	2.14227	5.41457	6.12906	5.92015	0.343223	0.192188	0.356007	0.594709	0.402192	0.136043	0.239097	0.096249	0.234063	0.089781	0.14252	0.152351	0.305462	0.110724	12.3693	3.62869	1.72265e-38	5.8162e-36	up	yes
ENSG00000272888	CHASERR	100507217	ENST00000554133;ENST00000556895;ENST00000692976;ENST00000555520;ENST00000553829;ENST00000555227;ENST00000554669;ENST00000557147;ENST00000554894;ENST00000557682	NA	NA	NA	NA	NA	CHD2 adjacent suppressive regulatory RNA [Source:HGNC Symbol;Acc:HGNC:48626]	retained_intron;lncRNA	NA	NA	5.69099	3.18109	4.67216	4.643	5.67643	9.60261	8.24192	11.818	6.19966	5.05328	3.8825	5.52846	8.19508	7.98323	20.8898	14.55	26.363	22.18	17.5192	16.2548	15.3608	8.91861	18.2216	5.90014	19.5981	20.8203	11.214	28.0267	0.367625	-1.44369	1.92816e-38	6.4558e-36	down	yes
ENSG00000079313	REXO1	57455	ENST00000586291;ENST00000586343;ENST00000170168;ENST00000643515;ENST00000590936;ENST00000587404;ENST00000588743;ENST00000587524	GO:0003676(nucleic acid binding);GO:0004518(nuclease activity);GO:0004527(exonuclease activity);GO:0005634(nucleus);GO:0005654(nucleoplasm);GO:0016604(nuclear body);GO:0016787(hydrolase activity);GO:0090305(nucleic acid phosphodiester bond hydrolysis);GO:0090305(nucleic acid phosphodiester bond hydrolysis)	03008(Ribosome biogenesis in eukaryotes);03008(Ribosome biogenesis in eukaryotes)	NA	NA	NA	RNA exonuclease 1 homolog [Source:HGNC Symbol;Acc:HGNC:24616]	retained_intron;nonsense_mediated_decay;protein_coding;processed_transcript	NA	NA	5.57067	4.20277	6.14675	4.1059	5.48537	7.09983	7.79162	7.48701	7.02282	6.73617	9.00971	6.98519	6.49219	7.3384	14.5584	10.0847	12.1757	13.5539	14.2244	8.24386	13.0041	8.2535	9.7785	4.15215	11.2057	13.056	11.2396	14.4326	0.579087	-0.788147	3.29377e-38	1.0937e-35	down	no
ENSG00000263002	ZNF234	10780	ENST00000426739;ENST00000590748;ENST00000592437;ENST00000590795	GO:0000978(RNA polymerase II cis-regulatory region sequence-specific DNA binding);GO:0000981(DNA-binding transcription factor activity, RNA polymerase II-specific);GO:0003677(DNA binding);GO:0005634(nucleus);GO:0006355(regulation of DNA-templated transcription);GO:0006357(regulation of transcription by RNA polymerase II);GO:0046872(metal ion binding);GO:0046872(metal ion binding)	05168(Herpes simplex virus 1 infection);05168(Herpes simplex virus 1 infection)	NA	NA	zf-C2H2	zinc finger protein 234 [Source:HGNC Symbol;Acc:HGNC:13027]	protein_coding;processed_transcript;nonsense_mediated_decay	NA	R-HSA-975040(KRAB-ZNF / KAP Interaction)	0.43863	0.405887	0.999244	0.508512	0.738987	0.525246	0.743505	0.815176	0.996576	0.774409	1.10704	0.942044	1.50105	1.33131	0.286355	0.0954794	0.15157	0.292416	0.30334	0.0864857	0.223383	0.136371	0.0750639	0.0685796	0.163107	0.149066	0.222295	0.20397	4.8129	2.26691	8.8781e-38	2.92381e-35	up	yes
ENSG00000010165	METTL13	51603	ENST00000361735;ENST00000485629;ENST00000478330;ENST00000476386;ENST00000362019;ENST00000466643	GO:0000122(negative regulation of transcription by RNA polymerase II);GO:0003824(catalytic activity);GO:0005515(protein binding);GO:0005634(nucleus);GO:0005737(cytoplasm);GO:0005739(mitochondrion);GO:0008152(metabolic process);GO:0008168(methyltransferase activity);GO:0016740(transferase activity);GO:0032259(methylation);GO:1902807(negative regulation of cell cycle G1/S phase transition);GO:19028…	NA	NA	NA	NA	methyltransferase 13, eEF1A lysine and N-terminal methyltransferase [Source:HGNC Symbol;Acc:HGNC:24248]	protein_coding;processed_transcript	NA	NA	2.41134	2.60553	3.73986	2.80909	4.37434	4.23323	4.51707	4.61396	7.23437	6.53874	9.25236	5.16535	8.11334	8.04479	1.34751	0.570835	0.989602	1.12413	1.89619	0.457845	1.59838	0.535878	0.426613	0.52376	0.791956	1.0549	1.17549	0.982295	5.46577	2.45042	1.7149e-37	5.60172e-35	up	yes
ENSG00000185252	ZNF74	7625	ENST00000476678;ENST00000400451;ENST00000493734;ENST00000611540;ENST00000357502;ENST00000403682;ENST00000437275	GO:0000978(RNA polymerase II cis-regulatory region sequence-specific DNA binding);GO:0000981(DNA-binding transcription factor activity, RNA polymerase II-specific);GO:0003677(DNA binding);GO:0003723(RNA binding);GO:0005634(nucleus);GO:0005654(nucleoplasm);GO:0006355(regulation of DNA-templated transcription);GO:0006357(regulation of transcription by RNA polymerase II);GO:0015629(actin cytoskeleto…	05168(Herpes simplex virus 1 infection);05168(Herpes simplex virus 1 infection)	NA	NA	zf-C2H2	zinc finger protein 74 [Source:HGNC Symbol;Acc:HGNC:13144]	retained_intron;protein_coding;nonsense_mediated_decay	NA	R-HSA-975040(KRAB-ZNF / KAP Interaction)	0.525857	0.423296	0.543859	0.465149	0.553891	0.750671	0.998176	1.23998	1.09345	0.925128	0.938784	1.12166	1.38978	1.15619	0.271187	0.22609	0.231339	0.325744	0.346277	0.17984	0.270747	0.117426	0.259527	0.121562	0.181502	0.23555	0.228992	0.294455	3.68541	1.88182	1.76437e-37	5.71683e-35	up	yes
ENSG00000100350	FOXRED2	80020	ENST00000684868;ENST00000397223;ENST00000685344;ENST00000366463;ENST00000216187;ENST00000397224;ENST00000685224;ENST00000688825;ENST00000685612;ENST00000691242;ENST00000689781;ENST00000688870	GO:0004497(monooxygenase activity);GO:0005515(protein binding);GO:0005783(endoplasmic reticulum);GO:0005788(endoplasmic reticulum lumen);GO:0016491(oxidoreductase activity);GO:0030433(ubiquitin-dependent ERAD pathway);GO:0050660(flavin adenine dinucleotide binding);GO:0050660(flavin adenine dinucleotide binding)	NA	NA	NA	NA	FAD dependent oxidoreductase domain containing 2 [Source:HGNC Symbol;Acc:HGNC:26264]	protein_coding;retained_intron	NA	NA	0.633704	0.659143	0.751993	0.63235	0.668916	0.953871	0.752982	0.802529	0.984031	1.16757	0.794844	1.03014	1.03094	1.02399	0.077401	0.125137	0.207969	0.199261	0.228555	0.0670327	0.120717	0.124781	0.0770957	0.0580388	0.318955	0.113828	0.225964	0.121416	5.75322	2.52437	2.3449e-37	7.53706e-35	up	yes
ENSG00000015568	RGPD5	84220	ENST00000477523;ENST00000016946;ENST00000493394;ENST00000495473;ENST00000495582;ENST00000393283;ENST00000413468;ENST00000472794;ENST00000482778;ENST00000430736	GO:0005096(GTPase activator activity);GO:0005515(protein binding);GO:0005643(nuclear pore);GO:0005737(cytoplasm);GO:0006607(NLS-bearing protein import into nucleus);GO:0046907(intracellular transport);GO:0050790(regulation of catalytic activity);GO:0050790(regulation of catalytic activity)	NA	NA	NA	NA	RANBP2 like and GRIP domain containing 5 [Source:HGNC Symbol;Acc:HGNC:32418]	retained_intron;protein_coding;processed_transcript;nonsense_mediated_decay	NA	NA	0.248163	0.179532	0.394091	0.247719	0.301479	0.401221	0.295395	0.491546	0.358973	0.349273	0.360277	0.408154	0.472311	0.579527	1.62882	0.643871	0.788223	0.975349	1.48568	0.577198	1.2003	0.398074	0.476372	0.2108	0.906338	0.93632	0.68971	1.17312	0.420809	-1.24876	3.8095e-37	1.21475e-34	down	yes
ENSG00000136824	SMC2	10592,83452	ENST00000374793;ENST00000374787;ENST00000286398;ENST00000493955;ENST00000440179	GO:0000166(nucleotide binding);GO:0000228(nuclear chromosome);GO:0000785(chromatin);GO:0000793(condensed chromosome);GO:0000794(condensed nuclear chromosome);GO:0000796(condensin complex);GO:0003682(chromatin binding);GO:0003697(single-stranded DNA binding);GO:0005515(protein binding);GO:0005524(ATP binding);GO:0005634(nucleus);GO:0005654(nucleoplasm);GO:0005694(chromosome);GO:0005730(nucleolus);…	NA	NA	NA	NA	structural maintenance of chromosomes 2 [Source:HGNC Symbol;Acc:HGNC:14011]	protein_coding;nonsense_mediated_decay	DOID:0050161(lower_respiratory_tract_disease);DOID:1532(pleural_disease);DOID:1579(respiratory_system_disease);DOID:3798(pleural_empyema);DOID:4(disease);DOID:7(disease_of_anatomical_entity)	R-HSA-2172666(RB1 binds condensin II);R-HSA-2288097(Condensin II complex binds H4K20me1-containing nucleosomes);R-HSA-2294574(Condensin II-mediated condensation of prophase chromosomes);R-HSA-2294580(PLK1 hyperphosphorylates Condensin II complex);R-HSA-2294590(PLK1 binds phosphorylated condensin II complex);R-HSA-2294600(CDK1 phosphorylates condensin II subunit NCAPD3);R-HSA-2429719(MCPH1 sequest…	1.01596	1.1672	1.44826	1.21692	1.83304	1.80117	1.4025	2.20805	2.87956	3.04469	1.30415	1.76928	3.2248	3.39076	0.524418	0.245597	0.468518	0.585006	0.451251	0.233704	0.478088	0.0450011	0.196248	0.0926371	0.343685	0.399007	0.512951	0.444438	5.51859	2.4643	4.50418e-37	1.42495e-34	up	yes
ENSG00000131462	TUBG1	7283	ENST00000251413;ENST00000681114;ENST00000681947;ENST00000680678;ENST00000588056;ENST00000591509;ENST00000589688;ENST00000680672;ENST00000681919;ENST00000681490;ENST00000680617;ENST00000679484;ENST00000589613	GO:0000070(mitotic sister chromatid segregation);GO:0000166(nucleotide binding);GO:0000212(meiotic spindle organization);GO:0000226(microtubule cytoskeleton organization);GO:0000242(pericentriolar material);GO:0000278(mitotic cell cycle);GO:0000794(condensed nuclear chromosome);GO:0000930(gamma-tubulin complex);GO:0005200(structural constituent of cytoskeleton);GO:0005515(protein binding);GO:0005…	05165(Human papillomavirus infection);05165(Human papillomavirus infection)	NA	NA	NA	tubulin gamma 1 [Source:HGNC Symbol;Acc:HGNC:12417]	protein_coding;retained_intron;nonsense_mediated_decay	NA	R-HSA-2574840(AJUBA facilitates AURKA autophosphorylation);R-HSA-2574845(AJUBA binds centrosome-associated AURKA);R-HSA-3000310(AURKA phosphorylates PLK1);R-HSA-3000319(BORA binds PLK1 and AURKA);R-HSA-380272(Plk1-mediated phosphorylation of Nlp);R-HSA-380283(Recruitment of additional gamma tubulin/ gamma TuRC to the centrosome);R-HSA-380294(Loss of C-Nap-1 from centrosomes);R-HSA-380303(Dissocia…	1.90357	1.89112	1.7743	2.20315	2.2352	2.24303	1.87248	2.53511	3.18286	5.03443	1.86913	3.05671	2.9242	3.92678	0.714125	0.623747	0.64835	0.804622	0.739444	0.423993	0.684618	0.237417	0.595879	0.211474	0.572243	0.481496	0.607402	0.634914	4.59315	2.19948	4.91526e-37	1.54285e-34	up	yes
ENSG00000004478	FKBP4	2288	ENST00000001008;ENST00000543037;ENST00000538622;ENST00000543769;ENST00000540260;ENST00000539181	GO:0000413(protein peptidyl-prolyl isomerization);GO:0003723(RNA binding);GO:0003755(peptidyl-prolyl cis-trans isomerase activity);GO:0005515(protein binding);GO:0005524(ATP binding);GO:0005525(GTP binding);GO:0005528(FK506 binding);GO:0005634(nucleus);GO:0005654(nucleoplasm);GO:0005737(cytoplasm);GO:0005739(mitochondrion);GO:0005829(cytosol);GO:0005856(cytoskeleton);GO:0005874(microtubule);GO:00…	04915(Estrogen signaling pathway);04915(Estrogen signaling pathway)	K09571	EC:5.2.1.8	NA	FKBP prolyl isomerase 4 [Source:HGNC Symbol;Acc:HGNC:3720]	protein_coding;retained_intron;nonsense_mediated_decay;processed_transcript	DOID:0050686(organ_system_cancer);DOID:0080015(physical_disorder);DOID:10892(hypospadias);DOID:14566(disease_of_cellular_proliferation);DOID:162(cancer);DOID:2914(immune_system_disease);DOID:3119(gastrointestinal_system_cancer);DOID:3571(liver_cancer);DOID:4(disease);DOID:612(primary_immunodeficiency_disease);DOID:684(hepatocellular_carcinoma);DOID:686(liver_carcinoma);DOID:7(disease_of_anatomica…	R-HSA-5324617(HSP90:FKBP4:PTGES3 binds HSF1 trimer);R-HSA-5618073(FKBP4 replaces FKBP5 within HSP90:ATP:FKBP5:unfolded protein);R-HSA-5618080(HSP90:ATP:p23:FKBP52:SHR:SH translocates to the nucleus);R-HSA-5618085(FKBP4 binds HSP90:ATP:STIP1:HSP70:nascent protein);R-HSA-5618093(ATP hydrolysis by HSP90);R-HSA-5618099(NR3C2 ligands bind NR3C2 (in the HSP90 chaperone complex));R-HSA-5618110(p23 (PTGE…	2.60282	2.70395	3.19098	3.46387	4.01544	5.47046	4.53842	4.85703	6.65759	5.89069	7.80232	5.6654	6.4866	6.37347	1.82661	1.40914	1.78449	2.15074	2.65697	1.31961	1.46629	1.13477	1.59352	0.68044	2.01777	1.87298	1.9013	2.35548	2.88452	1.52833	5.42706e-37	1.6903e-34	up	yes
ENSG00000182628	SKA2	348235	ENST00000330137;ENST00000581068;ENST00000583380;ENST00000583976;ENST00000437036;ENST00000578105;ENST00000583927;ENST00000580541;ENST00000584089	GO:0000278(mitotic cell cycle);GO:0000775(chromosome, centromeric region);GO:0000776(kinetochore);GO:0000940(outer kinetochore);GO:0005515(protein binding);GO:0005694(chromosome);GO:0005737(cytoplasm);GO:0005819(spindle);GO:0005829(cytosol);GO:0005856(cytoskeleton);GO:0005874(microtubule);GO:0005876(spindle microtubule);GO:0007049(cell cycle);GO:0007059(chromosome segregation);GO:0008017(microtub…	NA	NA	NA	NA	spindle and kinetochore associated complex subunit 2 [Source:HGNC Symbol;Acc:HGNC:28006]	protein_coding;nonsense_mediated_decay;processed_transcript	NA	R-HSA-141409(Mad1 binds kinetochore);R-HSA-141422(MAD2 converted to an inhibitory state via interaction with Mad1);R-HSA-141431(MAD2 associates with the Mad1 kinetochore complex);R-HSA-141439(Release of activated MAD2 from kinetochores);R-HSA-1638803(Phosphorylation of cohesin by PLK1 at centromeres);R-HSA-1638821(PP2A-B56 dephosphorylates centromeric cohesin);R-HSA-2467809(ESPL1 (Separase) cleav…	1.61081	1.61616	1.98665	2.40431	2.97225	3.28787	2.53756	3.10652	3.38688	3.16415	2.68619	2.86448	5.69516	4.5383	1.1667	0.637589	0.684502	1.18111	0.852282	0.693025	1.03614	0.239357	0.652157	0.327117	0.797792	0.841044	0.863434	0.764875	3.89837	1.96287	5.50336e-37	1.70088e-34	up	yes
ENSG00000213203	GIMAP1	170575	ENST00000307194;ENST00000464461	GO:0000139(Golgi membrane);GO:0000166(nucleotide binding);GO:0005515(protein binding);GO:0005525(GTP binding);GO:0005783(endoplasmic reticulum);GO:0005789(endoplasmic reticulum membrane);GO:0005794(Golgi apparatus);GO:0016020(membrane);GO:0016021(integral component of membrane);GO:0016021(integral component of membrane)	NA	NA	NA	NA	GTPase, IMAP family member 1 [Source:HGNC Symbol;Acc:HGNC:23237]	protein_coding;retained_intron	NA	NA	5.53556	5.16316	10.6039	6.93548	12.517	11.0191	12.728	14.3098	16.5324	10.5928	21.4745	14.7921	21.487	21.0034	5.85822	2.44888	3.73601	3.88575	5.53787	2.49734	5.03718	2.54991	2.18484	0.930928	3.83512	4.1886	3.67407	5.71799	3.54617	1.82626	5.81035e-37	1.78205e-34	up	yes
ENSG00000055483	USP36	57602	ENST00000586066;ENST00000590546;ENST00000592907;ENST00000589254;ENST00000588130;ENST00000449938;ENST00000589225;ENST00000312010;ENST00000590312;ENST00000592231;ENST00000587379;ENST00000542802;ENST00000588086;ENST00000586896;ENST00000588467;ENST00000587010;ENST00000589424;ENST00000586531;ENST00000591052;ENST00000587783;ENST00000592275;ENST00000591942;ENST00000693020;ENST00000588365	GO:0003723(RNA binding);GO:0004197(cysteine-type endopeptidase activity);GO:0004843(cysteine-type deubiquitinase activity);GO:0005515(protein binding);GO:0005634(nucleus);GO:0005654(nucleoplasm);GO:0005730(nucleolus);GO:0005737(cytoplasm);GO:0005829(cytosol);GO:0006508(proteolysis);GO:0006511(ubiquitin-dependent protein catabolic process);GO:0007000(nucleolus organization);GO:0008233(peptidase ac…	NA	K11855	EC:3.4.19.12	NA	ubiquitin specific peptidase 36 [Source:HGNC Symbol;Acc:HGNC:20062]	protein_coding;retained_intron;nonsense_mediated_decay;processed_transcript	DOID:14566(disease_of_cellular_proliferation);DOID:162(cancer);DOID:4(disease)	NA	1.9116	1.64128	2.70636	1.67885	2.3887	3.05997	3.1754	3.29185	4.0375	4.15349	4.9414	3.61515	3.53975	4.0452	15.0767	6.1557	7.27145	9.16105	13.279	4.37214	12.0653	4.41282	8.3679	2.60641	4.96794	9.95394	6.65049	11.5869	0.381156	-1.39155	6.95296e-37	2.11633e-34	down	yes
ENSG00000165934	CPSF2	53981	ENST00000298875;ENST00000553427;ENST00000554290;ENST00000556622;ENST00000555244	GO:0003723(RNA binding);GO:0005515(protein binding);GO:0005634(nucleus);GO:0005654(nucleoplasm);GO:0005847(mRNA cleavage and polyadenylation specificity factor complex);GO:0006378(mRNA polyadenylation);GO:0006379(mRNA cleavage);GO:0006397(mRNA processing);GO:0006398(mRNA 3'-end processing by stem-loop binding and cleavage);GO:0016020(membrane);GO:0098789(pre-mRNA cleavage required for polyadenyla…	03015(mRNA surveillance pathway);03015(mRNA surveillance pathway)	NA	NA	NA	cleavage and polyadenylation specific factor 2 [Source:HGNC Symbol;Acc:HGNC:2325]	protein_coding;nonsense_mediated_decay;retained_intron	NA	R-HSA-156661(Formation of Exon Junction Complex);R-HSA-72130(Formation of an intermediate Spliceosomal C complex);R-HSA-72139(Formation of the active Spliceosomal C complex);R-HSA-72143(Lariat Formation and 5'-Splice Site Cleavage);R-HSA-72160(Cleavage at the 3'-Splice Site and Exon Ligation);R-HSA-72180(Cleavage of mRNA at the 3'-end);R-HSA-72185(mRNA polyadenylation);R-HSA-72231(Formation of th…	1.04224	1.07586	2.23606	1.38296	2.26238	3.12108	1.75445	2.51137	2.16074	2.21672	3.46315	1.9384	4.31129	4.16997	0.848982	0.538308	0.812405	0.779861	0.789244	0.281409	0.775724	0.255149	0.300922	0.151267	0.827587	1.03416	0.47218	0.826803	3.8701	1.95237	1.3011e-36	3.93049e-34	up	yes
ENSG00000085465	OVGP1	5016	ENST00000369732;ENST00000481495;ENST00000494622	GO:0004568(chitinase activity);GO:0005576(extracellular region);GO:0005829(cytosol);GO:0005975(carbohydrate metabolic process);GO:0006032(chitin catabolic process);GO:0007338(single fertilization);GO:0007565(female pregnancy);GO:0008061(chitin binding);GO:0015630(microtubule cytoskeleton);GO:0030133(transport vesicle);GO:0031410(cytoplasmic vesicle);GO:0035805(egg coat);GO:0043231(intracellular m…	NA	NA	NA	NA	oviductal glycoprotein 1 [Source:HGNC Symbol;Acc:HGNC:8524]	protein_coding;processed_transcript	DOID:0050686(organ_system_cancer);DOID:120(female_reproductive_organ_cancer);DOID:1380(endometrial_cancer);DOID:14566(disease_of_cellular_proliferation);DOID:1579(respiratory_system_disease);DOID:162(cancer);DOID:193(reproductive_organ_cancer);DOID:2871(endometrial_carcinoma);DOID:3437(laryngitis);DOID:363(uterine_cancer);DOID:4(disease);DOID:786(laryngeal_disease);DOID:7(disease_of_anatomical_en…	R-HSA-1297338(Association of ADAM and B4GALT1 With ZP3)	0.265259	0.192963	0.135498	0.148421	0.344682	0.243237	0.242616	0.520508	0.375893	0.269751	0.306871	0.442579	0.492818	0.550497	1.29851	0.556073	1.21598	1.47454	1.56737	0.578328	1.33598	0.763024	1.24902	0.298689	1.12149	0.896597	0.713234	1.0439	0.321099	-1.63891	1.91246e-36	5.73423e-34	down	yes
ENSG00000113407	TARS1	6897	ENST00000265112;ENST00000502508;ENST00000508361;ENST00000503422;ENST00000509731;ENST00000504698;ENST00000513066;ENST00000505012;ENST00000506040;ENST00000509410;ENST00000455217;ENST00000502553	GO:0000049(tRNA binding);GO:0000166(nucleotide binding);GO:0003723(RNA binding);GO:0004812(aminoacyl-tRNA ligase activity);GO:0004829(threonine-tRNA ligase activity);GO:0005515(protein binding);GO:0005524(ATP binding);GO:0005737(cytoplasm);GO:0005829(cytosol);GO:0006412(translation);GO:0006418(tRNA aminoacylation for protein translation);GO:0006435(threonyl-tRNA aminoacylation);GO:0008270(zinc io…	00970(Aminoacyl-tRNA biosynthesis);00970(Aminoacyl-tRNA biosynthesis)	K01868	EC:6.1.1.3	NA	threonyl-tRNA synthetase 1 [Source:HGNC Symbol;Acc:HGNC:11572]	protein_coding;processed_transcript;nonsense_mediated_decay;retained_intron	NA	R-HSA-380002(threonine + tRNA(Thr) + ATP => Thr-tRNA(Thr) + AMP + pyrophosphate)	4.35538	4.9419	7.10465	6.21425	6.25354	6.54781	5.66296	7.48852	10.1385	9.94593	8.69743	9.31997	12.956	11.9913	3.55499	1.90488	3.65545	3.57578	3.23826	1.88305	2.94695	0.888061	1.83546	0.913147	2.50518	2.86795	2.02827	3.90241	3.12657	1.64458	2.26337e-36	6.73614e-34	up	yes
ENSG00000274314	MIR6749	102466727	ENST00000617008	NA	NA	NA	NA	NA	microRNA 6749 [Source:HGNC Symbol;Acc:HGNC:50087]	miRNA	NA	NA	1.42919	0	1.38941	0.210963	0.191986	1.04341	0.57018	0.996123	0.901739	0	0	0.390537	0.785612	0.798481	8.88565	9.89528	8.80084	12.0124	8.66246	6.07319	6.43482	6.23188	6.60156	1.94735	12.2394	14.983	4.34142	11.7437	0.0732639	-3.77075	2.55464e-36	7.54707e-34	down	yes
ENSG00000138078	PREPL	9581	ENST00000409957;ENST00000409411;ENST00000409936;ENST00000410081;ENST00000426481;ENST00000425263;ENST00000378520;ENST00000260648;ENST00000477410;ENST00000420756;ENST00000409272;ENST00000541738;ENST00000438314	GO:0004252(serine-type endopeptidase activity);GO:0005634(nucleus);GO:0005737(cytoplasm);GO:0005794(Golgi apparatus);GO:0005802(trans-Golgi network);GO:0005829(cytosol);GO:0005856(cytoskeleton);GO:0006508(proteolysis);GO:0008233(peptidase activity);GO:0008236(serine-type peptidase activity);GO:0016787(hydrolase activity);GO:0042147(retrograde transport, endosome to Golgi);GO:0043001(Golgi to plas…	NA	NA	NA	NA	prolyl endopeptidase like [Source:HGNC Symbol;Acc:HGNC:30228]	protein_coding;nonsense_mediated_decay;processed_transcript	DOID:0050686(organ_system_cancer);DOID:11054(urinary_bladder_cancer);DOID:14566(disease_of_cellular_proliferation);DOID:162(cancer);DOID:225(syndrome);DOID:3996(urinary_system_cancer);DOID:4007(bladder_carcinoma);DOID:4(disease)	NA	1.18901	0.858869	1.65333	1.09665	1.45316	2.05078	1.67277	2.5608	2.16335	2.24523	2.78923	2.18864	3.20074	3.42242	0.581559	0.272019	0.407099	0.843081	1.05689	0.248725	0.476771	0.260043	0.223585	0.0920856	0.57883	0.726567	0.720198	0.718338	3.96139	1.98601	3.02147e-36	8.86106e-34	up	yes
ENSG00000161048	NAPEPLD	222236	ENST00000465647;ENST00000414118;ENST00000341533;ENST00000479761;ENST00000425379;ENST00000427257;ENST00000420631;ENST00000418294;ENST00000417955	GO:0000139(Golgi membrane);GO:0001523(retinoid metabolic process);GO:0001659(temperature homeostasis);GO:0005634(nucleus);GO:0005635(nuclear envelope);GO:0005654(nucleoplasm);GO:0005737(cytoplasm);GO:0005768(endosome);GO:0005769(early endosome);GO:0005794(Golgi apparatus);GO:0006629(lipid metabolic process);GO:0008270(zinc ion binding);GO:0009395(phospholipid catabolic process);GO:0016020(membran…	04723(Retrograde endocannabinoid signaling);04723(Retrograde endocannabinoid signaling)	K13985	EC:3.1.4.54	NA	N-acyl phosphatidylethanolamine phospholipase D [Source:HGNC Symbol;Acc:HGNC:21683]	protein_coding;retained_intron;nonsense_mediated_decay	NA	R-HSA-2466831(A2PE hydrolyses to A2E)	0.446173	0.324431	0.940229	0.455764	0.689434	0.740483	0.808169	1.09259	0.958238	0.753763	0.855261	0.855014	1.09242	1.35934	0.263359	0.247827	0.334173	0.367374	0.241296	0.178015	0.288842	0.128856	0.126612	0.0487719	0.286099	0.38291	0.306319	0.384481	3.17197	1.66538	5.16534e-36	1.50386e-33	up	yes
ENSG00000243137	PSG4	5672	ENST00000405312;ENST00000597912;ENST00000495316;ENST00000490769;ENST00000451895;ENST00000597349;ENST00000599371;ENST00000597374;ENST00000600572;ENST00000244295	GO:0002682(regulation of immune system process);GO:0005576(extracellular region);GO:0005886(plasma membrane);GO:0007165(signal transduction);GO:0007565(female pregnancy);GO:0009986(cell surface);GO:1990782(protein tyrosine kinase binding);GO:1990782(protein tyrosine kinase binding)	NA	NA	NA	NA	pregnancy specific beta-1-glycoprotein 4 [Source:HGNC Symbol;Acc:HGNC:9521]	protein_coding;retained_intron	NA	R-HSA-8870732(PSGs bind proteoglycans and TGF-beta1)	0.226851	0.418369	0.182994	0.445366	0.332857	0.26523	0.254513	0.369654	0.236659	0.256514	0	0.192566	0.17176	0.366921	0	0	0	0	0	0	0	0	0	0	0	0	0	0	2657.32	11.3758	5.56325e-36	1.60537e-33	up	yes
ENSG00000198590	APRG1	339883	ENST00000425932;ENST00000669217;ENST00000662797;ENST00000661769;ENST00000654228;ENST00000426078;ENST00000328376;ENST00000665000;ENST00000425564	NA	NA	NA	NA	NA	APRG1 tumor suppressor candidate [Source:HGNC Symbol;Acc:HGNC:24082]	lncRNA	NA	NA	0.0160802	0.0135136	0.036956	0.0307635	0.032853	0.113708	0.0602595	0.077204	0.058957	0.0793567	0.0444406	0.0723857	0.0214617	0.0670457	0.257388	0.207067	0.366406	0.336854	0.283272	0.172075	0.147626	0.145433	0.191331	0.116799	0.243346	0.397183	0.164357	0.317823	0.21661	-2.20683	5.59389e-36	1.60537e-33	down	yes
ENSG00000174007	CEP19	84984	ENST00000409690;ENST00000399942	GO:0000922(spindle pole);GO:0005515(protein binding);GO:0005654(nucleoplasm);GO:0005737(cytoplasm);GO:0005813(centrosome);GO:0005814(centriole);GO:0005856(cytoskeleton);GO:0005929(cilium);GO:0030030(cell projection organization);GO:0034454(microtubule anchoring at centrosome);GO:0036064(ciliary basal body);GO:0042995(cell projection);GO:0060271(cilium assembly);GO:0097712(vesicle targeting, trans…	NA	NA	NA	NA	centrosomal protein 19 [Source:HGNC Symbol;Acc:HGNC:28209]	protein_coding	NA	NA	8.077	4.66335	6.82483	5.96287	7.66008	9.07429	7.7466	16.5559	5.50818	6.676	7.18842	6.71391	15.9572	12.2916	0.998756	0.728615	2.41211	1.89701	1.49618	0.432828	0.704677	0.480754	0.680753	0.154968	2.88405	2.39342	1.56671	1.39129	6.63482	2.73006	6.3397e-36	1.8065e-33	up	yes
ENSG00000198910	L1CAM	3897	ENST00000370055;ENST00000361981;ENST00000370060;ENST00000491983;ENST00000484652;ENST00000474853;ENST00000407935;ENST00000616195;ENST00000370058;ENST00000439496;ENST00000458029;ENST00000455590;ENST00000496122;ENST00000420165	GO:0005515(protein binding);GO:0005886(plasma membrane);GO:0005925(focal adhesion);GO:0006935(chemotaxis);GO:0007155(cell adhesion);GO:0007156(homophilic cell adhesion via plasma membrane adhesion molecules);GO:0007160(cell-matrix adhesion);GO:0007399(nervous system development);GO:0007411(axon guidance);GO:0008046(axon guidance receptor activity);GO:0009986(cell surface);GO:0016020(membrane);GO:…	04360(Axon guidance);04514(Cell adhesion molecules);04514(Cell adhesion molecules)	NA	NA	NA	L1 cell adhesion molecule [Source:HGNC Symbol;Acc:HGNC:6470]	protein_coding;retained_intron;processed_transcript	DOID:0050622(reproductive_organ_benign_neoplasm);DOID:0050686(organ_system_cancer);DOID:0050687(cell_type_cancer);DOID:0060037(developmental_disorder_of_mental_health);DOID:0060038(specific_developmental_disorder);DOID:0060072(benign_neoplasm);DOID:0060084(cell_type_benign_neoplasm);DOID:0060085(organ_system_benign_neoplasm);DOID:0060086(female_reproductive_organ_benign_neoplasm);DOID:0060095(ute…	R-HSA-373736(Shootin-1 links L1 and retrograde actin flow);R-HSA-374669(L1 binds NRP1);R-HSA-374672(Cis-heterodimerization of L1 and Axonin-1);R-HSA-374673(L1 binds RanBPM);R-HSA-374675(L1 dimer binds Ankyrin);R-HSA-374677(L1 binds ERM family members);R-HSA-374680(L1 trans-homophilic interaction);R-HSA-374681(L1 and NCAM1 engaged in cis-interaction);R-HSA-374683(Interaction of L1 with Neurocan);R…	1.5986	1.66085	1.39268	1.86323	1.6874	1.66636	1.68948	1.57492	3.32174	4.28572	0.0937634	4.3391	3.86257	4.29771	0.140262	0.126597	0.139415	0.190192	0.314616	0.095439	0.115217	0.111043	0.123793	0.103823	0.187462	0.083775	0.089275	0.138976	17.0082	4.08816	7.17478e-36	2.03006e-33	up	yes
ENSG00000092853	CLSPN	63967	ENST00000318121;ENST00000251195;ENST00000517467;ENST00000466308	GO:0000076(DNA replication checkpoint signaling);GO:0000077(DNA damage checkpoint signaling);GO:0000217(DNA secondary structure binding);GO:0003677(DNA binding);GO:0005515(protein binding);GO:0005634(nucleus);GO:0005654(nucleoplasm);GO:0005794(Golgi apparatus);GO:0006281(DNA repair);GO:0006974(cellular response to DNA damage stimulus);GO:0007049(cell cycle);GO:0007095(mitotic G2 DNA damage checkp…	NA	NA	NA	NA	claspin [Source:HGNC Symbol;Acc:HGNC:19715]	protein_coding;retained_intron;processed_transcript	DOID:14566(disease_of_cellular_proliferation);DOID:162(cancer);DOID:4(disease)	R-HSA-176298(Activation of claspin);R-HSA-176318(Loading of claspin onto DNA during replication origin firing);R-HSA-351936(Caspase-mediated cleavage of claspin);R-HSA-5684882(CHEK1 is recruited to resected DNA DSBs);R-HSA-5684887(Activation of CHEK1 at resected DNA DSBs);R-HSA-5696914(USP28 deubiquitinates CLSPN and MYC)	0.274653	0.332222	0.328335	0.416571	0.365443	0.39281	0.343559	0.60545	0.763657	0.771395	0.478738	0.502891	0.910819	0.784622	0.0850499	0.0225576	0.141243	0.0806603	0.0431342	0.0656465	0.0852957	0.0115854	0.0442418	0.00464251	0.0827529	0.134043	0.0969086	0.102604	7.26851	2.86166	8.34996e-36	2.34605e-33	up	yes
ENSG00000110917	MLEC	9761	ENST00000228506;ENST00000535413;ENST00000412616;ENST00000545525;ENST00000535656	GO:0005515(protein binding);GO:0005783(endoplasmic reticulum);GO:0005789(endoplasmic reticulum membrane);GO:0005886(plasma membrane);GO:0005975(carbohydrate metabolic process);GO:0006487(protein N-linked glycosylation);GO:0008250(oligosaccharyltransferase complex);GO:0016020(membrane);GO:0016021(integral component of membrane);GO:0019899(enzyme binding);GO:0030246(carbohydrate binding);GO:0035579…	NA	NA	NA	NA	malectin [Source:HGNC Symbol;Acc:HGNC:28973]	protein_coding;processed_transcript	NA	R-HSA-532667(Removal of the second glucose by glucosidase II);R-HSA-6799350(Exocytosis of specific granule membrane proteins);R-HSA-901006(Binding of Malectin)	5.08122	5.22932	7.41013	6.76804	9.01334	7.96448	7.76028	10.7215	11.3781	16.0475	11.7603	10.6376	15.1674	15.0544	3.95654	2.51409	4.28867	4.19507	4.64188	2.10325	3.42102	1.50899	1.81147	0.917205	3.40821	3.95816	4.45411	4.85578	3.04106	1.60458	8.86098e-36	2.47234e-33	up	yes
ENSG00000152213	ARL11	115761	ENST00000282026;ENST00000490932	GO:0000166(nucleotide binding);GO:0002244(hematopoietic progenitor cell differentiation);GO:0003924(GTPase activity);GO:0005515(protein binding);GO:0005525(GTP binding);GO:0005886(plasma membrane);GO:0006886(intracellular protein transport);GO:0016192(vesicle-mediated transport);GO:0016192(vesicle-mediated transport)	NA	NA	NA	NA	ADP ribosylation factor like GTPase 11 [Source:HGNC Symbol;Acc:HGNC:24046]	protein_coding;processed_transcript	NA	NA	4.19473	3.29335	4.30528	3.52645	4.90625	5.50825	5.42276	8.98912	4.14836	3.21821	4.64598	3.60411	7.93795	5.50299	1.4964	0.904669	1.98175	2.0469	1.3799	0.840117	1.4647	0.684634	0.924504	0.289051	2.05834	1.85416	1.37144	2.56389	3.4845	1.80095	9.21301e-36	2.55283e-33	up	yes
ENSG00000140749	IGSF6	10261	ENST00000268389;ENST00000565499;ENST00000569602	GO:0004888(transmembrane signaling receptor activity);GO:0005887(integral component of plasma membrane);GO:0006955(immune response);GO:0007166(cell surface receptor signaling pathway);GO:0016020(membrane);GO:0016021(integral component of membrane);GO:0016021(integral component of membrane)	NA	NA	NA	NA	immunoglobulin superfamily member 6 [Source:HGNC Symbol;Acc:HGNC:5953]	protein_coding;retained_intron	DOID:4(disease)	NA	25.6565	26.6151	32.6148	29.8081	39.7065	32.4268	33.8576	50.1328	36.4135	15.0846	28.2406	22.4743	51.3793	35.0209	10.3493	5.50826	12.9835	12.2908	8.98267	5.75195	6.51567	2.98487	5.86439	2.72611	9.42073	10.1984	8.40838	13.187	3.98909	1.99606	9.86664e-36	2.71522e-33	up	yes
ENSG00000224032	EPB41L4A-AS1	114915	ENST00000663232;ENST00000442823;ENST00000690733;ENST00000427306;ENST00000508590;ENST00000702686;ENST00000688370	NA	NA	NA	NA	NA	EPB41L4A antisense RNA 1 [Source:HGNC Symbol;Acc:HGNC:30749]	lncRNA	NA	NA	1.05012	0.833078	1.4957	1.06048	1.47662	2.08967	2.2004	2.40092	1.66329	1.92619	2.13618	2.62128	2.59619	2.14031	5.04254	3.65072	4.00212	4.19442	5.56167	3.53143	4.18233	3.27228	4.41881	1.52461	3.43972	3.59886	2.7042	5.2725	0.472284	-1.08227	1.07028e-35	2.92528e-33	down	yes
ENSG00000183054	RGPD6	729540	ENST00000463822;ENST00000459645;ENST00000329516;ENST00000437167;ENST00000696447;ENST00000696449;ENST00000473101;ENST00000484024;ENST00000455695;ENST00000696446;ENST00000480894;ENST00000330331;ENST00000446930;ENST00000490990	GO:0005096(GTPase activator activity);GO:0005515(protein binding);GO:0005643(nuclear pore);GO:0005737(cytoplasm);GO:0006607(NLS-bearing protein import into nucleus);GO:0046907(intracellular transport);GO:0050790(regulation of catalytic activity);GO:0050790(regulation of catalytic activity)	NA	NA	NA	NA	RANBP2 like and GRIP domain containing 6 [Source:HGNC Symbol;Acc:HGNC:32419]	retained_intron;protein_coding;nonsense_mediated_decay;processed_transcript	NA	NA	0.242521	0.171902	0.294067	0.270495	0.287993	0.412576	0.375345	0.50355	0.371237	0.307698	0.449086	0.352449	0.415752	0.498286	1.73526	0.640904	0.799358	1.21446	1.50777	0.515523	1.13215	0.468314	0.50232	0.207209	0.653666	0.862505	0.715606	1.01947	0.413625	-1.2736	1.08767e-35	2.95274e-33	down	yes
ENSG00000130517	PGPEP1	54858	ENST00000269919;ENST00000596962;ENST00000604499;ENST00000252813;ENST00000595552;ENST00000595066;ENST00000597663;ENST00000600283;ENST00000597431	GO:0005515(protein binding);GO:0005737(cytoplasm);GO:0005829(cytosol);GO:0006508(proteolysis);GO:0008233(peptidase activity);GO:0008234(cysteine-type peptidase activity);GO:0016787(hydrolase activity);GO:0016920(pyroglutamyl-peptidase activity);GO:0030163(protein catabolic process);GO:0030163(protein catabolic process)	NA	K01304	EC:3.4.19.3	NA	pyroglutamyl-peptidase I [Source:HGNC Symbol;Acc:HGNC:13568]	protein_coding;nonsense_mediated_decay	NA	NA	2.03041	1.53855	2.80871	1.47081	2.50998	3.22089	3.44245	3.72646	3.05769	3.2629	4.25446	3.35471	3.23955	3.5084	6.08153	3.20899	6.34681	5.90921	5.51083	2.92193	4.56017	2.7794	3.21537	1.6189	5.70974	5.64856	5.20973	6.53238	0.634846	-0.655521	1.62844e-35	4.39111e-33	down	no
ENSG00000137807	KIF23	9493	ENST00000352331;ENST00000647715;ENST00000558303;ENST00000559456;ENST00000679126;ENST00000559944;ENST00000560042;ENST00000643966;ENST00000260363;ENST00000560125;ENST00000395392;ENST00000561089;ENST00000558585	GO:0000022(mitotic spindle elongation);GO:0000166(nucleotide binding);GO:0000281(mitotic cytokinesis);GO:0003777(microtubule motor activity);GO:0005515(protein binding);GO:0005524(ATP binding);GO:0005634(nucleus);GO:0005654(nucleoplasm);GO:0005737(cytoplasm);GO:0005813(centrosome);GO:0005819(spindle);GO:0005829(cytosol);GO:0005856(cytoskeleton);GO:0005871(kinesin complex);GO:0005874(microtubule);…	05206(MicroRNAs in cancer);05206(MicroRNAs in cancer)	NA	NA	NA	kinesin family member 23 [Source:HGNC Symbol;Acc:HGNC:6392]	protein_coding;retained_intron;nonsense_mediated_decay;processed_transcript	NA	R-HSA-156673(Regulation of KIF23 (MKLP1) by phosphorylation);R-HSA-2213248(Transport of antigen loaded MHC II molecules to surface);R-HSA-6811423(Retrograde vesicle is tethered at the ER by the NRZ complex and t-SNAREs);R-HSA-6811426(Retrograde COPI vesicles bind kinesin and microtubules);R-HSA-983259(Kinesins move along microtubules consuming ATP);R-HSA-983266(Kinesins bind microtubules);R-HSA-9…	0.811555	0.714348	0.929994	1.04782	0.863175	0.859618	0.796184	1.01116	1.78556	2.20069	0.518717	1.58206	1.97105	2.42949	0.0294534	0.0782805	0.13574	0.141226	0.0718465	0.184018	0.147602	0.0448781	0.13202	0.0753259	0.109781	0.125195	0.119629	0.153588	11.3145	3.5001	1.84929e-35	4.95337e-33	up	yes
ENSG00000014919	COX15	1355	ENST00000016171;ENST00000370483;ENST00000497381	GO:0004129(cytochrome-c oxidase activity);GO:0005515(protein binding);GO:0005654(nucleoplasm);GO:0005739(mitochondrion);GO:0005743(mitochondrial inner membrane);GO:0005746(mitochondrial respirasome);GO:0006123(mitochondrial electron transport, cytochrome c to oxygen);GO:0006783(heme biosynthetic process);GO:0006784(heme A biosynthetic process);GO:0007585(respiratory gaseous exchange by respirator…	00190(Oxidative phosphorylation);00860(Porphyrin and chlorophyll metabolism);01100(Metabolic pathways);01240(Biosynthesis of cofactors);04714(Thermogenesis);04714(Thermogenesis)	NA	NA	NA	cytochrome c oxidase assembly homolog COX15 [Source:HGNC Symbol;Acc:HGNC:2263]	protein_coding;retained_intron	DOID:0050700(cardiomyopathy);DOID:0060036(intrinsic_cardiomyopathy);DOID:10652(Alzheimer's_disease);DOID:114(heart_disease);DOID:11984(hypertrophic_cardiomyopathy);DOID:1287(cardiovascular_system_disease);DOID:1289(neurodegenerative_disease);DOID:1307(dementia);DOID:150(disease_of_mental_health);DOID:1561(cognitive_disorder);DOID:225(syndrome);DOID:331(central_nervous_system_disease);DOID:4(disea…	R-HSA-2995334(COX15 transforms heme O to heme A)	2.2653	2.41582	3.35315	2.08852	3.99956	4.0311	3.45869	5.12638	4.80486	4.62713	5.06281	3.83757	5.5062	6.23331	1.79103	1.08799	1.87887	2.04928	2.317	0.886747	1.4702	0.729909	1.27347	0.413794	2.3563	1.98955	2.06853	2.10025	2.53472	1.34182	1.91298e-35	5.09005e-33	up	yes
ENSG00000102225	CDK16	5127	ENST00000428400;ENST00000276052;ENST00000518022;ENST00000462827;ENST00000522234;ENST00000523543;ENST00000457458;ENST00000493213;ENST00000462483;ENST00000523034;ENST00000519758;ENST00000520141;ENST00000520893;ENST00000517997;ENST00000357227;ENST00000523699;ENST00000523344;ENST00000520295;ENST00000522883;ENST00000517479;ENST00000518391	GO:0000083(regulation of transcription involved in G1/S transition of mitotic cell cycle);GO:0000166(nucleotide binding);GO:0000307(cyclin-dependent protein kinase holoenzyme complex);GO:0004672(protein kinase activity);GO:0004674(protein serine/threonine kinase activity);GO:0004693(cyclin-dependent protein serine/threonine kinase activity);GO:0004712(protein serine/threonine/tyrosine kinase acti…	NA	K08820	EC:2.7.11.22	NA	cyclin dependent kinase 16 [Source:HGNC Symbol;Acc:HGNC:8749]	retained_intron;protein_coding;processed_transcript	DOID:0050686(organ_system_cancer);DOID:1192(peripheral_nervous_system_neoplasm);DOID:14566(disease_of_cellular_proliferation);DOID:162(cancer);DOID:2621(autonomic_nervous_system_neoplasm);DOID:3093(nervous_system_cancer);DOID:4(disease);DOID:769(neuroblastoma)	NA	3.2169	2.67642	3.98182	3.14007	3.85528	5.85337	5.0416	4.84823	5.33731	5.53048	4.03795	5.13735	4.99181	4.92231	11.1029	8.31857	9.98406	11.6137	11.0855	8.29566	7.01437	7.14057	9.68354	2.7392	8.64774	11.7865	6.0468	13.0215	0.494707	-1.01535	2.49263e-35	6.58874e-33	down	yes
ENSG00000168264	IRF2BP2	359948	ENST00000366610;ENST00000366609;ENST00000491430	GO:0000122(negative regulation of transcription by RNA polymerase II);GO:0002327(immature B cell differentiation);GO:0003714(transcription corepressor activity);GO:0005634(nucleus);GO:0005654(nucleoplasm);GO:0005737(cytoplasm);GO:0006357(regulation of transcription by RNA polymerase II);GO:0046872(metal ion binding);GO:0046872(metal ion binding)	NA	NA	NA	NA	interferon regulatory factor 2 binding protein 2 [Source:HGNC Symbol;Acc:HGNC:21729]	protein_coding;processed_transcript	NA	NA	8.83086	7.08435	12.4042	8.84868	12.1482	24.4965	21.1025	24.3978	14.4355	12.1329	21.1277	12.9482	16.3795	19.4938	32.1523	24.4154	42.3965	33.309	35.9661	20.1334	28.6654	17.4675	29.038	9.56871	33.3896	34.4132	31.3347	43.5265	0.519103	-0.945908	3.09243e-35	8.12075e-33	down	no
ENSG00000121864	ZNF639	51193	ENST00000621687;ENST00000483460;ENST00000494234;ENST00000481587;ENST00000484866;ENST00000496856;ENST00000491818;ENST00000326361;ENST00000466663;ENST00000466264	GO:0000976(transcription cis-regulatory region binding);GO:0000978(RNA polymerase II cis-regulatory region sequence-specific DNA binding);GO:0001228(DNA-binding transcription activator activity, RNA polymerase II-specific);GO:0003677(DNA binding);GO:0003700(DNA-binding transcription factor activity);GO:0005515(protein binding);GO:0005634(nucleus);GO:0005654(nucleoplasm);GO:0006357(regulation of t…	NA	NA	NA	zf-C2H2	zinc finger protein 639 [Source:HGNC Symbol;Acc:HGNC:30950]	protein_coding;retained_intron;processed_transcript	NA	NA	0.648379	0.562961	0.980147	0.885183	1.23195	1.68247	1.42477	2.28598	1.55888	1.57238	1.39728	1.49283	2.26018	2.02032	3.06012	2.42769	3.35691	3.33702	3.78639	1.89826	2.32333	1.35233	2.02711	0.594454	2.44613	3.30831	2.05168	3.31013	0.567001	-0.818578	3.91291e-35	1.02086e-32	down	no
ENSG00000188305	PEAK3	374872	ENST00000342063	GO:0004672(protein kinase activity);GO:0005515(protein binding);GO:0005925(focal adhesion);GO:0006468(protein phosphorylation);GO:0008360(regulation of cell shape);GO:0015629(actin cytoskeleton);GO:0032956(regulation of actin cytoskeleton organization);GO:0043621(protein self-association)	NA	NA	NA	NA	PEAK family member 3 [Source:HGNC Symbol;Acc:HGNC:24793]	protein_coding	NA	NA	7.75375	7.98642	7.14199	4.53895	8.6713	7.36565	6.68358	6.74629	6.29127	6.88879	14.6716	5.8871	7.76794	8.37969	0.839594	0.723213	1.08585	1.70866	1.2867	0.584918	0.706294	1.02274	0.755911	0.88544	1.62268	1.81264	0.873181	1.10477	7.11232	2.83032	4.50629e-35	1.16809e-32	up	yes
ENSG00000105497	ZNF175	7728	ENST00000262259;ENST00000600460;ENST00000596504;ENST00000545217	GO:0000122(negative regulation of transcription by RNA polymerase II);GO:0000977(RNA polymerase II transcription regulatory region sequence-specific DNA binding);GO:0000978(RNA polymerase II cis-regulatory region sequence-specific DNA binding);GO:0000981(DNA-binding transcription factor activity, RNA polymerase II-specific);GO:0001227(DNA-binding transcription repressor activity, RNA polymerase I…	05168(Herpes simplex virus 1 infection);05168(Herpes simplex virus 1 infection)	NA	NA	zf-C2H2	zinc finger protein 175 [Source:HGNC Symbol;Acc:HGNC:12964]	protein_coding;retained_intron	DOID:331(central_nervous_system_disease);DOID:4(disease);DOID:7(disease_of_anatomical_entity);DOID:863(nervous_system_disease);DOID:936(brain_disease);DOID:9588(encephalitis)	R-HSA-975040(KRAB-ZNF / KAP Interaction)	0.409154	0.214682	0.510006	0.310445	0.579025	0.596917	0.405813	0.655306	0.797776	0.74935	0.698164	0.686722	0.846905	1.05544	0.201013	0.122797	0.105019	0.0972105	0.125039	0.07179	0.151862	0.133513	0.0926737	0.0448432	0.17999	0.138871	0.200863	0.164218	4.65415	2.21852	4.79119e-35	1.23398e-32	up	yes
ENSG00000138604	GLCE	26035	ENST00000261858;ENST00000559420;ENST00000559500;ENST00000559798	GO:0000139(Golgi membrane);GO:0005509(calcium ion binding);GO:0005794(Golgi apparatus);GO:0015012(heparan sulfate proteoglycan biosynthetic process);GO:0016020(membrane);GO:0016021(integral component of membrane);GO:0016853(isomerase activity);GO:0016857(racemase and epimerase activity, acting on carbohydrates and derivatives);GO:0030210(heparin biosynthetic process);GO:0042803(protein homodimeri…	00534(Glycosaminoglycan biosynthesis - heparan sulfate / heparin);01100(Metabolic pathways);01100(Metabolic pathways)	K01793	EC:5.1.3.17	NA	glucuronic acid epimerase [Source:HGNC Symbol;Acc:HGNC:17855]	protein_coding;processed_transcript	NA	R-HSA-2024100(GLCE epimerises GlcA to IdoA);R-HSA-2076371(GLCE epimerises more GlcA to IdoA as sulfate content rises)	0.645336	0.912365	0.838464	1.24697	1.39052	1.26151	1.44874	2.11407	1.74523	1.28322	1.18296	1.33491	1.56637	1.69468	0.463766	0.373997	0.423252	0.366901	0.449111	0.219754	0.267769	0.144232	0.140495	0.0510127	0.46438	0.350951	0.393063	0.267364	4.26534	2.09266	4.82776e-35	1.23548e-32	up	yes
ENSG00000011677	GABRA3	2556	ENST00000370314;ENST00000417858	GO:0004888(transmembrane signaling receptor activity);GO:0004890(GABA-A receptor activity);GO:0005216(ion channel activity);GO:0005230(extracellular ligand-gated ion channel activity);GO:0005237(inhibitory extracellular ligand-gated ion channel activity);GO:0005254(chloride channel activity);GO:0005515(protein binding);GO:0005886(plasma membrane);GO:0005887(integral component of plasma membrane);…	04080(Neuroactive ligand-receptor interaction);04723(Retrograde endocannabinoid signaling);04727(GABAergic synapse);04742(Taste transduction);05032(Morphine addiction);05033(Nicotine addiction);05033(Nicotine addiction)	NA	NA	NA	gamma-aminobutyric acid type A receptor subunit alpha3 [Source:HGNC Symbol;Acc:HGNC:4077]	protein_coding;processed_transcript	DOID:0050686(organ_system_cancer);DOID:0060037(developmental_disorder_of_mental_health);DOID:0060040(pervasive_developmental_disorder);DOID:0060041(autism_spectrum_disorder);DOID:0080014(chromosomal_disease);DOID:12849(autistic_disorder);DOID:14566(disease_of_cellular_proliferation);DOID:150(disease_of_mental_health);DOID:162(cancer);DOID:1932(Angelman_syndrome);DOID:225(syndrome);DOID:3119(gastr…	R-HSA-8856398(NPTN binds GABA A receptors);R-HSA-975340(GABR heteropentamers:GABA transport Cl- from extracellular region to cytosol)	0.379509	0.29449	0.177578	0.275685	0.288169	0.293628	0.351078	0.235141	0.355102	0.370481	0	0.525534	0.45112	0.426213	0	0	0	0	0	0	0	0	0	0	0	0	0	0	3159.81	11.6256	4.89017e-35	1.24353e-32	up	yes
ENSG00000091106	NLRC4	58484	ENST00000402280;ENST00000360906;ENST00000342905;ENST00000652197;ENST00000404025	GO:0000166(nucleotide binding);GO:0000287(magnesium ion binding);GO:0002218(activation of innate immune response);GO:0002221(pattern recognition receptor signaling pathway);GO:0002376(immune system process);GO:0005515(protein binding);GO:0005524(ATP binding);GO:0005737(cytoplasm);GO:0005829(cytosol);GO:0006915(apoptotic process);GO:0006919(activation of cysteine-type endopeptidase activity involv…	04621(NOD-like receptor signaling pathway);05131(Shigellosis);05132(Salmonella infection);05134(Legionellosis);05135(Yersinia infection);05135(Yersinia infection)	NA	NA	NA	NLR family CARD domain containing 4 [Source:HGNC Symbol;Acc:HGNC:16412]	protein_coding;nonsense_mediated_decay	NA	R-HSA-6801415(TP53 stimulates NLRC4 expression);R-HSA-844617(IPAF binds procaspase-1);R-HSA-874084(IPAF is activated)	3.47706	3.59787	5.01315	3.47123	5.4437	7.92145	6.98085	8.48489	7.77721	3.32585	6.45008	3.83597	5.19071	4.78547	1.86888	0.423563	2.11172	1.43713	1.2297	0.434537	1.12589	0.278458	0.512068	0.258229	1.25322	1.62006	0.809268	1.35146	5.14847	2.36414	5.72736e-35	1.44726e-32	up	yes
ENSG00000179115	FARSA	2193	ENST00000314606;ENST00000588965;ENST00000423140;ENST00000592662;ENST00000587981;ENST00000586146;ENST00000586280	GO:0000049(tRNA binding);GO:0000166(nucleotide binding);GO:0003723(RNA binding);GO:0004812(aminoacyl-tRNA ligase activity);GO:0004826(phenylalanine-tRNA ligase activity);GO:0005515(protein binding);GO:0005524(ATP binding);GO:0005737(cytoplasm);GO:0005829(cytosol);GO:0006412(translation);GO:0006432(phenylalanyl-tRNA aminoacylation);GO:0009328(phenylalanine-tRNA ligase complex);GO:0016020(membrane)…	00970(Aminoacyl-tRNA biosynthesis);00970(Aminoacyl-tRNA biosynthesis)	K01889	EC:6.1.1.20	NA	phenylalanyl-tRNA synthetase subunit alpha [Source:HGNC Symbol;Acc:HGNC:3592]	protein_coding;retained_intron;nonsense_mediated_decay	DOID:150(disease_of_mental_health);DOID:1561(cognitive_disorder);DOID:2468(psychotic_disorder);DOID:4(disease);DOID:5419(schizophrenia)	R-HSA-379848(phenylalanine + tRNA(Phe) + ATP => Phe-tRNA(Phe) + AMP + pyrophosphate)	6.69389	6.89858	8.81634	7.17833	10.4968	7.1414	9.34142	9.96168	15.3137	21.1916	17.8782	15.2977	14.8881	14.6588	4.38909	2.42786	3.16321	3.37228	4.9149	2.03165	3.77428	1.74394	2.44128	1.09588	2.68851	3.15037	3.59426	4.03252	3.871	1.95271	6.30611e-35	1.58354e-32	up	yes
ENSG00000139636	LMBR1L	55716	ENST00000552141;ENST00000547813;ENST00000550867;ENST00000552577;ENST00000549587;ENST00000457164;ENST00000551272;ENST00000547698;ENST00000547382;ENST00000549429;ENST00000551143;ENST00000267102;ENST00000551535;ENST00000548983;ENST00000549730;ENST00000417750;ENST00000552879;ENST00000551115;ENST00000547670;ENST00000551782;ENST00000550815;ENST00000551854;ENST00000552153;ENST00000547675;ENST00000553204…	GO:0004888(transmembrane signaling receptor activity);GO:0005515(protein binding);GO:0005783(endoplasmic reticulum);GO:0005789(endoplasmic reticulum membrane);GO:0005886(plasma membrane);GO:0005887(integral component of plasma membrane);GO:0006897(endocytosis);GO:0006898(receptor-mediated endocytosis);GO:0007165(signal transduction);GO:0016020(membrane);GO:0016021(integral component of membrane);…	NA	NA	NA	NA	limb development membrane protein 1 like [Source:HGNC Symbol;Acc:HGNC:18268]	retained_intron;nonsense_mediated_decay;protein_coding;processed_transcript	NA	NA	4.29745	3.02481	4.47513	3.31097	3.83223	5.1805	5.7025	6.04787	5.52482	4.74572	5.82609	5.00658	5.9916	5.81825	9.94956	6.50367	8.81992	10.2165	9.13385	5.6334	7.87172	6.43961	7.6405	2.35442	7.58128	8.16462	7.72722	12.167	0.62416	-0.680011	8.41858e-35	2.10088e-32	down	no
ENSG00000169155	ZBTB43	23099	ENST00000373457;ENST00000450858;ENST00000449886;ENST00000373464;ENST00000497064	GO:0000785(chromatin);GO:0000977(RNA polymerase II transcription regulatory region sequence-specific DNA binding);GO:0000981(DNA-binding transcription factor activity, RNA polymerase II-specific);GO:0001025(RNA polymerase III general transcription initiation factor binding);GO:0003677(DNA binding);GO:0005515(protein binding);GO:0005634(nucleus);GO:0006357(regulation of transcription by RNA polyme…	NA	NA	NA	ZBTB	zinc finger and BTB domain containing 43 [Source:HGNC Symbol;Acc:HGNC:17908]	protein_coding;processed_transcript	NA	NA	0.865723	0.854592	1.42824	0.844698	1.22749	1.91863	1.24177	1.81854	1.99312	1.27824	1.72907	1.4542	2.22732	1.80273	4.80463	2.90774	6.11529	4.18435	4.28857	2.09301	3.09375	1.74684	1.3259	0.677103	4.17537	5.02734	4.16945	3.99474	0.425569	-1.23254	9.21911e-35	2.28645e-32	down	yes
ENSG00000112414	ADGRG6	57211	ENST00000296932;ENST00000367608;ENST00000367609;ENST00000230173;ENST00000415128;ENST00000538281;ENST00000508295;ENST00000463637;ENST00000497898;ENST00000472054;ENST00000541199;ENST00000540208;ENST00000435011	GO:0004175(endopeptidase activity);GO:0004888(transmembrane signaling receptor activity);GO:0004930(G protein-coupled receptor activity);GO:0005518(collagen binding);GO:0005737(cytoplasm);GO:0005789(endoplasmic reticulum membrane);GO:0005886(plasma membrane);GO:0005887(integral component of plasma membrane);GO:0007165(signal transduction);GO:0007166(cell surface receptor signaling pathway);GO:000…	NA	NA	NA	NA	adhesion G protein-coupled receptor G6 [Source:HGNC Symbol;Acc:HGNC:13841]	protein_coding;retained_intron;nonsense_mediated_decay	NA	R-HSA-9613644(SOX10-dependent POU3F1 gene expression);R-HSA-9614271(Autocleavage of ADGRG6);R-HSA-9614273(ADGRG heterodimer translocates to plasma membrane)	0.486328	0.479089	0.450431	0.639851	0.587589	0.511866	0.574489	0.457159	1.61346	1.89655	0.0441652	2.00849	2.09133	1.95087	0.00962478	0.0354841	0.0689048	0.0441181	0.0489266	0.0131249	0.0111033	0	0.0175215	0.0280882	0.0232921	0.0377896	0.039505	0.0208989	34.6192	5.1135	1.01375e-34	2.4988e-32	up	yes
ENSG00000162664	ZNF326	284695	ENST00000340281;ENST00000394583;ENST00000361911;ENST00000370447	GO:0000993(RNA polymerase II complex binding);GO:0003677(DNA binding);GO:0003723(RNA binding);GO:0005515(protein binding);GO:0005634(nucleus);GO:0005654(nucleoplasm);GO:0006397(mRNA processing);GO:0008380(RNA splicing);GO:0016363(nuclear matrix);GO:0032784(regulation of DNA-templated transcription elongation);GO:0043229(intracellular organelle);GO:0043231(intracellular membrane-bounded organelle)…	NA	NA	NA	Others	zinc finger protein 326 [Source:HGNC Symbol;Acc:HGNC:14104]	protein_coding;nonsense_mediated_decay	NA	NA	0.662464	0.445129	0.831129	0.647695	0.710557	1.05101	0.693537	1.09821	1.09001	1.08894	0.686484	0.890022	1.39778	1.29983	2.52235	1.41841	2.16325	2.81632	2.58793	1.35797	1.74777	0.786187	0.858919	0.504168	1.82013	2.81216	1.71248	2.62448	0.489373	-1.03099	1.02532e-34	2.51191e-32	down	yes
ENSG00000248092	NNT-AS1	100652772	ENST00000513560;ENST00000606697;ENST00000503484;ENST00000515466;ENST00000668986;ENST00000656020;ENST00000500258	NA	NA	NA	NA	NA	NNT antisense RNA 1 [Source:HGNC Symbol;Acc:HGNC:49005]	lncRNA	NA	NA	0.336376	0.371033	0.408017	0.214326	0.457172	0.544008	0.538532	0.813669	0.728473	0.635951	0.713443	0.559062	1.05763	0.939019	0.177671	0.0763154	0.203764	0.128297	0.303647	0.0727011	0.214146	0.0722168	0.130852	0.0243673	0.114219	0.159464	0.151739	0.154045	4.19307	2.06801	1.20121e-34	2.92499e-32	up	yes
ENSG00000173338	KCNK7	10089	ENST00000394216;ENST00000340313;ENST00000530380;ENST00000394217;ENST00000342202	GO:0005244(voltage-gated ion channel activity);GO:0005267(potassium channel activity);GO:0005515(protein binding);GO:0005886(plasma membrane);GO:0005887(integral component of plasma membrane);GO:0006811(ion transport);GO:0006813(potassium ion transport);GO:0016020(membrane);GO:0016021(integral component of membrane);GO:0022841(potassium ion leak channel activity);GO:0030322(stabilization of membr…	NA	NA	NA	NA	potassium two pore domain channel subfamily K member 7 [Source:HGNC Symbol;Acc:HGNC:6282]	protein_coding	NA	R-HSA-1299304(Activation of tandem pore domain in a weak inwardly rectifying K+ channels);R-HSA-5578910(KCNK dimers transport K+ from cytosol to extracellular region)	0.724015	0.873545	0.986243	0.545687	0.237553	3.12645	0.834814	1.37429	0.941543	0.938825	0.685456	0.505982	0.689798	0.631517	6.20996	4.9618	7.71354	9.58929	6.76427	5.7918	4.18447	6.30754	7.01883	6.73921	7.58115	6.90843	5.24184	12.6745	0.134059	-2.89907	1.26906e-34	3.07157e-32	down	yes
ENSG00000149483	TMEM138	51524	ENST00000540194;ENST00000381787;ENST00000542946;ENST00000688279;ENST00000423772;ENST00000543594;ENST00000545420;ENST00000278826;ENST00000692219;ENST00000451389;ENST00000534963;ENST00000692785;ENST00000685597;ENST00000543833;ENST00000692667;ENST00000688430;ENST00000691720;ENST00000689882;ENST00000507563;ENST00000539776;ENST00000693557;ENST00000686820;ENST00000689076	GO:0005773(vacuole);GO:0005774(vacuolar membrane);GO:0005929(cilium);GO:0016020(membrane);GO:0016021(integral component of membrane);GO:0030030(cell projection organization);GO:0042995(cell projection);GO:0060271(cilium assembly);GO:0060271(cilium assembly)	NA	NA	NA	NA	transmembrane protein 138 [Source:HGNC Symbol;Acc:HGNC:26944]	retained_intron;protein_coding;nonsense_mediated_decay;processed_transcript	NA	NA	0.649258	0.675398	1.06487	0.810525	1.10379	1.54289	1.35265	1.45112	1.56406	1.6055	1.59248	1.35766	1.78458	1.5264	2.68844	1.65541	1.95661	2.52662	2.44545	1.38677	1.98466	1.27651	1.78776	0.592556	1.80683	2.32556	2.0252	2.93167	0.660136	-0.599164	1.28849e-34	3.09994e-32	down	no
ENSG00000135093	USP30	84749	ENST00000491362;ENST00000479219;ENST00000536723;ENST00000377883;ENST00000536393;ENST00000467307;ENST00000392784;ENST00000539121;ENST00000257548	GO:0000422(autophagy of mitochondrion);GO:0000425(pexophagy);GO:0004197(cysteine-type endopeptidase activity);GO:0004843(cysteine-type deubiquitinase activity);GO:0005515(protein binding);GO:0005634(nucleus);GO:0005739(mitochondrion);GO:0005741(mitochondrial outer membrane);GO:0005778(peroxisomal membrane);GO:0005829(cytosol);GO:0006508(proteolysis);GO:0006511(ubiquitin-dependent protein cataboli…	04137(Mitophagy - animal);04137(Mitophagy - animal)	K11851	EC:3.4.19.12	NA	ubiquitin specific peptidase 30 [Source:HGNC Symbol;Acc:HGNC:20065]	retained_intron;protein_coding;nonsense_mediated_decay	NA	R-HSA-5696872(USP30 deubiquitinates Ub-MOM proteins);R-HSA-9674127(USP30 deubiquitinates ATM dimer:Ub-p-PEX5);R-HSA-9674131(USP30 binds ATM dimer:Ub-p-PEX5)	0.643548	0.876803	1.05493	1.01868	1.13739	1.49216	1.33912	1.64091	1.46152	1.05555	1.40618	1.25852	1.68257	1.78599	3.43014	1.393	3.21975	2.6402	2.7284	1.90482	2.76248	1.51346	1.55361	0.564327	2.31108	3.30657	2.13103	3.49627	0.541762	-0.884268	1.42217e-34	3.4012e-32	down	no
ENSG00000146476	ARMT1	79624	ENST00000367294;ENST00000483931;ENST00000494826;ENST00000545879	GO:0005515(protein binding);GO:0006479(protein methylation);GO:0006974(cellular response to DNA damage stimulus);GO:0008168(methyltransferase activity);GO:0008757(S-adenosylmethionine-dependent methyltransferase activity);GO:0008983(protein-glutamate O-methyltransferase activity);GO:0016740(transferase activity);GO:0016787(hydrolase activity);GO:0016791(phosphatase activity);GO:0019899(enzyme bin…	NA	NA	NA	NA	acidic residue methyltransferase 1 [Source:HGNC Symbol;Acc:HGNC:17872]	protein_coding;processed_transcript;nonsense_mediated_decay	NA	NA	4.17704	2.02453	4.58255	4.28951	4.37401	5.78905	4.5378	6.27819	6.78409	5.02948	5.29288	4.3936	9.40402	7.68557	1.56367	1.35673	2.37818	2.20507	2.17309	0.862326	2.03578	0.588786	0.967338	0.58423	2.31686	2.26717	1.28052	2.63963	3.21465	1.68466	1.44478e-34	3.43483e-32	up	yes
ENSG00000235859	ENSG00000235859		ENST00000496846	NA	NA	NA	NA	NA	proteasome (prosome, macropain) 26S subunit, ATPase, 5 (PSMC5) pseudogene	processed_pseudogene	NA	NA	2.57462	1.26458	2.53335	1.7337	2.70804	6.30059	3.46517	5.50202	3.01092	1.75251	2.7858	1.81076	3.32967	3.62241	11.6059	6.19465	12.4486	11.397	10.751	7.04135	8.68566	4.6868	8.90752	4.00231	8.64434	13.7333	5.4556	12.8254	0.335451	-1.57582	1.61036e-34	3.80594e-32	down	yes
ENSG00000132763	MMACHC	25974	ENST00000401061	GO:0005515(protein binding);GO:0005737(cytoplasm);GO:0005829(cytosol);GO:0006749(glutathione metabolic process);GO:0009235(cobalamin metabolic process);GO:0016491(oxidoreductase activity);GO:0016740(transferase activity);GO:0031419(cobalamin binding);GO:0032451(demethylase activity);GO:0033787(cyanocobalamin reductase (cyanide-eliminating) activity);GO:0042803(protein homodimerization activity);G…	04977(Vitamin digestion and absorption)	K14618	EC:1.16.1.6;EC:2.5.1.151	NA	metabolism of cobalamin associated C [Source:HGNC Symbol;Acc:HGNC:24525]	protein_coding	DOID:0050687(cell_type_cancer);DOID:14566(disease_of_cellular_proliferation);DOID:162(cancer);DOID:1909(melanoma);DOID:4(disease)	R-HSA-3095889(MMACHC dealkylates RCbl);R-HSA-3149494(MMACHC:cob(II)alamin binds MMADHC);R-HSA-3149519(MMACHC decyanates CNCbl);R-HSA-3149563(MMADHC targets transport of cytosolic cob(II)alamin to mitochondria);R-HSA-3204318(cob(II)alamin is transferred from MMACHC:MMADHC:cob(II)alamin to MTRR:MTR);R-HSA-3318571(Defective MMADHC does not bind MMACHC:B12r);R-HSA-3318576(Defective MMACHC does not re…	0.326397	0.252922	0.314409	0.276382	0.459054	0.310226	0.36093	0.361899	0.470604	0.809789	0.515039	0.687186	0.528192	0.904971	0.067957	0.042876	0.068528	0.071455	0.174274	0.012302	0.04238	0.063413	0.066743	0.007402	0.043126	0.096013	0.050209	0.1158	7.13079	2.83406	2.04922e-34	4.81484e-32	up	yes
ENSG00000155816	FMN2	56776	ENST00000319653;ENST00000447095;ENST00000679725;ENST00000681296;ENST00000679390;ENST00000543681;ENST00000681741	GO:0003674(molecular_function);GO:0003779(actin binding);GO:0005634(nucleus);GO:0005730(nucleolus);GO:0005737(cytoplasm);GO:0005783(endoplasmic reticulum);GO:0005789(endoplasmic reticulum membrane);GO:0005819(spindle);GO:0005829(cytosol);GO:0005856(cytoskeleton);GO:0005884(actin filament);GO:0005886(plasma membrane);GO:0005902(microvillus);GO:0005938(cell cortex);GO:0006974(cellular response to D…	NA	NA	NA	NA	formin 2 [Source:HGNC Symbol;Acc:HGNC:14074]	protein_coding;processed_transcript;retained_intron;nonsense_mediated_decay	NA	NA	0.115462	0.133383	0.0612576	0.121486	0.103144	0.0911265	0.0930414	0.0923687	0.161638	0.232225	0.00222742	0.17151	0.153323	0.154026	0	0	0	0.00165426	0	0	0	0	0.00265756	0	0	0	0	0	391.069	8.61128	2.3519e-34	5.49387e-32	up	yes
ENSG00000131876	SNRPA1	6627	ENST00000560433;ENST00000560307;ENST00000394082;ENST00000559686;ENST00000560383;ENST00000561187;ENST00000540017;ENST00000560856;ENST00000558036;ENST00000560496;ENST00000254193;ENST00000560987;ENST00000559309;ENST00000558059	GO:0000398(mRNA splicing, via spliceosome);GO:0003723(RNA binding);GO:0005515(protein binding);GO:0005634(nucleus);GO:0005654(nucleoplasm);GO:0005681(spliceosomal complex);GO:0005686(U2 snRNP);GO:0006397(mRNA processing);GO:0007283(spermatogenesis);GO:0008380(RNA splicing);GO:0016604(nuclear body);GO:0016607(nuclear speck);GO:0030532(small nuclear ribonucleoprotein complex);GO:0030620(U2 snRNA bi…	03040(Spliceosome);03040(Spliceosome)	NA	NA	NA	small nuclear ribonucleoprotein polypeptide A' [Source:HGNC Symbol;Acc:HGNC:11152]	retained_intron;processed_transcript;protein_coding;nonsense_mediated_decay	NA	R-HSA-156661(Formation of Exon Junction Complex);R-HSA-72124(Formation of the Spliceosomal A Complex);R-HSA-72127(Formation of the Spliceosomal B Complex);R-HSA-72130(Formation of an intermediate Spliceosomal C complex);R-HSA-72139(Formation of the active Spliceosomal C complex);R-HSA-72143(Lariat Formation and 5'-Splice Site Cleavage);R-HSA-72160(Cleavage at the 3'-Splice Site and Exon Ligation)…	1.2682	1.32047	1.9058	1.5436	2.19381	3.33453	2.14131	3.64691	4.03624	3.80107	2.58585	3.8588	4.852	4.18089	11.7426	4.92902	7.60859	9.22291	8.8004	5.46078	7.03533	2.83089	6.99393	1.47357	5.39927	9.11491	5.88314	10.9114	0.417523	-1.26007	2.68203e-34	6.22882e-32	down	yes
ENSG00000178718	RPP25	54913	ENST00000322177	GO:0000172(ribonuclease MRP complex);GO:0001682(tRNA 5'-leader removal);GO:0003676(nucleic acid binding);GO:0003723(RNA binding);GO:0004526(ribonuclease P activity);GO:0005515(protein binding);GO:0005634(nucleus);GO:0005654(nucleoplasm);GO:0005730(nucleolus);GO:0006364(rRNA processing);GO:0008033(tRNA processing);GO:0030677(ribonuclease P complex);GO:0030681(multimeric ribonuclease P complex);GO:…	03008(Ribosome biogenesis in eukaryotes);03013(RNA transport)	K14525	EC:3.1.26.5	NA	ribonuclease P and MRP subunit p25 [Source:HGNC Symbol;Acc:HGNC:30361]	protein_coding	NA	R-HSA-5696810(RNase P cleaves the 5' end of pre-tRNA);R-HSA-6791223(18SE pre-rRNA in pre-40S particles is nucleolytically processed during translocation from the nucleus to the cytosol)	1.04608	0.614738	1.01253	0.972402	1.18074	0.923222	1.13268	1.11719	1.28891	1.25338	2.31572	1.30659	1.76332	1.80297	0.385927	0.274485	0.560623	0.543962	0.420458	0.227202	0.21241	0.194701	0.265965	0.14955	0.311445	0.291488	0.310936	0.472015	3.83679	1.9399	4.17153e-34	9.63241e-32	up	yes
ENSG00000165943	MOAP1	64112	ENST00000298894;ENST00000556883	GO:0001844(protein insertion into mitochondrial membrane involved in apoptotic signaling pathway);GO:0005515(protein binding);GO:0005737(cytoplasm);GO:0005739(mitochondrion);GO:0005741(mitochondrial outer membrane);GO:0005829(cytosol);GO:0006914(autophagy);GO:0006915(apoptotic process);GO:0008625(extrinsic apoptotic signaling pathway via death domain receptors);GO:0008630(intrinsic apoptotic sign…	NA	NA	NA	NA	modulator of apoptosis 1 [Source:HGNC Symbol;Acc:HGNC:16658]	protein_coding	DOID:14566(disease_of_cellular_proliferation);DOID:162(cancer);DOID:4(disease)	NA	4.63826	2.57716	4.97174	3.57875	4.94416	9.20012	9.12651	11.7535	7.30094	5.5895	6.70704	9.28998	12.7339	10.3614	20.1601	13.3202	18.1179	21.1497	24.3586	13.282	18.2795	10.794	21.0216	3.58517	13.879	19.4848	12.1681	23.1132	0.441628	-1.1791	5.20989e-34	1.19613e-31	down	yes
ENSG00000117000	RLF	6018,3640	ENST00000372771	GO:0000981(DNA-binding transcription factor activity, RNA polymerase II-specific);GO:0001228(DNA-binding transcription activator activity, RNA polymerase II-specific);GO:0003677(DNA binding);GO:0005515(protein binding);GO:0005634(nucleus);GO:0006357(regulation of transcription by RNA polymerase II);GO:0044030(regulation of DNA methylation);GO:0045893(positive regulation of DNA-templated transcrip…	NA	NA	NA	zf-C2H2	RLF zinc finger [Source:HGNC Symbol;Acc:HGNC:10025]	protein_coding	NA	NA	2.42481	1.45033	2.58386	2.19457	2.61651	4.29022	3.1099	5.61272	3.4739	2.38629	3.04063	3.2089	5.35275	5.41625	8.75999	6.58741	10.0576	10.1809	11.0423	6.98897	8.25266	3.52567	4.31333	1.32739	6.57301	13.5137	6.60869	13.1406	0.425369	-1.23321	6.80241e-34	1.55288e-31	down	yes
ENSG00000163528	CHCHD4	131474	ENST00000396914;ENST00000295767;ENST00000420103	GO:0005515(protein binding);GO:0005739(mitochondrion);GO:0005758(mitochondrial intermembrane space);GO:0015031(protein transport);GO:0015035(protein-disulfide reductase activity);GO:0016491(oxidoreductase activity);GO:0018171(peptidyl-cysteine oxidation);GO:0022417(protein maturation by protein folding);GO:0033108(mitochondrial respiratory chain complex assembly);GO:0045041(protein import into mi…	NA	NA	NA	NA	coiled-coil-helix-coiled-coil-helix domain containing 4 [Source:HGNC Symbol;Acc:HGNC:26467]	protein_coding;processed_transcript	NA	R-HSA-1307802(MIA40:ERV1 (CHCHD4:GFER) oxidizes cysteine residues to cystine disulfide bonds)	1.43483	1.23738	1.73359	1.73992	1.89148	1.55481	2.46098	2.51461	2.99247	2.70611	3.1681	2.13535	3.90515	3.84661	1.00877	0.616203	0.959175	0.960674	0.691196	0.446027	0.782776	0.265242	0.676924	0.148388	0.631597	0.555084	0.725191	0.563656	3.68971	1.88351	8.79347e-34	1.99607e-31	up	yes
ENSG00000141934	PLPP2	8612	ENST00000269812;ENST00000621795;ENST00000434325;ENST00000589672;ENST00000586998;ENST00000591572;ENST00000633125;ENST00000327790	GO:0005515(protein binding);GO:0005768(endosome);GO:0005769(early endosome);GO:0005783(endoplasmic reticulum);GO:0005789(endoplasmic reticulum membrane);GO:0005886(plasma membrane);GO:0005887(integral component of plasma membrane);GO:0005901(caveola);GO:0006629(lipid metabolic process);GO:0006644(phospholipid metabolic process);GO:0006670(sphingosine metabolic process);GO:0006672(ceramide metabol…	00561(Glycerolipid metabolism);00564(Glycerophospholipid metabolism);00565(Ether lipid metabolism);00600(Sphingolipid metabolism);01100(Metabolic pathways);04072(Phospholipase D signaling pathway);04666(Fc gamma R-mediated phagocytosis);04975(Fat digestion and absorption);05231(Choline metabolism in cancer);05231(Choline metabolism in cancer)	K01080	EC:3.1.3.4	NA	phospholipid phosphatase 2 [Source:HGNC Symbol;Acc:HGNC:9230]	protein_coding;retained_intron	NA	R-HSA-428696(sphingosine 1-phosphate + H2O => sphingosine + orthophosphate [cytosolic - PPAP])	0.106017	0.123241	0.165976	0.0650566	0.0871081	0.116934	0.0626522	0.0425594	0.28019	0.2842	0.132035	0.218271	0.203045	0.327254	0.104968	0.0920846	0.0674001	0.143235	0.24655	0.143221	0.13757	0.0932827	0.161835	0.123328	0.114866	0.053897	0.00818332	0.0550409	1.43293	0.518971	0.945592	0.993924	up	no
ENSG00000114988	LMAN2L	81562	ENST00000377079;ENST00000264963;ENST00000434524;ENST00000434865;ENST00000446780;ENST00000480869;ENST00000440610;ENST00000474494;ENST00000449221	GO:0000139(Golgi membrane);GO:0005515(protein binding);GO:0005537(mannose binding);GO:0005783(endoplasmic reticulum);GO:0005789(endoplasmic reticulum membrane);GO:0005793(endoplasmic reticulum-Golgi intermediate compartment);GO:0005794(Golgi apparatus);GO:0006457(protein folding);GO:0006888(endoplasmic reticulum to Golgi vesicle-mediated transport);GO:0007029(endoplasmic reticulum organization);G…	NA	NA	NA	NA	lectin, mannose binding 2 like [Source:HGNC Symbol;Acc:HGNC:19263]	protein_coding;nonsense_mediated_decay;retained_intron	NA	R-HSA-203973(Vesicle budding);R-HSA-204008(SEC31:SEC13 and v-SNARE recruitment);R-HSA-5694409(Nucleotide exchange on RAB1);R-HSA-5694417(SEC16 complex binds SAR1B:GTP:SEC23:SEC24);R-HSA-5694418(RAB1:GTP binds USO1 and GORASP1:GOLGA2);R-HSA-5694428(LMAN family proteins bind glycosylated cargo);R-HSA-5694439(COPII coat binds TRAPPCII and RAB1:GDP);R-HSA-5694441(CSNK1D phosphorylates SEC23);R-HSA-56…	1.54013	1.11052	1.76419	1.0546	1.73212	2.56125	2.55206	2.34869	2.86114	2.49818	2.76634	2.74401	3.21694	3.15025	0.576105	0.568945	0.713051	0.878993	1.18165	0.225359	0.777257	0.416456	0.519411	0.279472	1.02449	0.781706	0.495093	1.01138	3.37593	1.75529	9.94346e-34	2.23189e-31	up	yes
ENSG00000185129	PURA	5813	ENST00000331327;ENST00000651386;ENST00000676000;ENST00000505703;ENST00000502351	GO:0000122(negative regulation of transcription by RNA polymerase II);GO:0000781(chromosome, telomeric region);GO:0000900(mRNA regulatory element binding translation repressor activity);GO:0000977(RNA polymerase II transcription regulatory region sequence-specific DNA binding);GO:0000981(DNA-binding transcription factor activity, RNA polymerase II-specific);GO:0003677(DNA binding);GO:0003690(doub…	NA	NA	NA	Others	purine rich element binding protein A [Source:HGNC Symbol;Acc:HGNC:9701]	protein_coding;processed_transcript	DOID:0050686(organ_system_cancer);DOID:10283(prostate_cancer);DOID:10652(Alzheimer's_disease);DOID:114(heart_disease);DOID:1287(cardiovascular_system_disease);DOID:1289(neurodegenerative_disease);DOID:1307(dementia);DOID:14566(disease_of_cellular_proliferation);DOID:150(disease_of_mental_health);DOID:1561(cognitive_disorder);DOID:162(cancer);DOID:193(reproductive_organ_cancer);DOID:2468(psychotic…	NA	0.598158	0.543923	1.34553	0.695634	1.04893	1.10486	0.995606	1.32312	1.62535	1.49613	1.95931	1.55133	1.9315	1.93076	0.460362	0.332704	0.394269	0.406743	0.655328	0.2538	0.47246	0.117583	0.231553	0.0991009	0.33337	0.4134	0.478215	0.530537	3.50427	1.80912	1.07561e-33	2.40088e-31	up	yes
ENSG00000139734	DIAPH3	81624	ENST00000400324;ENST00000615942;ENST00000377908;ENST00000498416	GO:0003779(actin binding);GO:0005634(nucleus);GO:0005737(cytoplasm);GO:0005829(cytosol);GO:0005884(actin filament);GO:0007010(cytoskeleton organization);GO:0008017(microtubule binding);GO:0016043(cellular component organization);GO:0030036(actin cytoskeleton organization);GO:0030041(actin filament polymerization);GO:0031267(small GTPase binding);GO:0045296(cadherin binding);GO:0045296(cadherin bi…	04810(Regulation of actin cytoskeleton);04810(Regulation of actin cytoskeleton)	NA	NA	NA	diaphanous related formin 3 [Source:HGNC Symbol;Acc:HGNC:15480]	protein_coding;retained_intron	NA	R-HSA-5666070(RHOB:GTP recruits DIAPH1 or DIAPH3 to endosomes);R-HSA-9013009(RHOA binds effectors at the plasma membrane);R-HSA-9013024(RHOB binds effectors at the plasma membrane);R-HSA-9013110(RHOC binds effectors at the plasma membrane);R-HSA-9013145(RAC1 binds effectors at the plasma membrane);R-HSA-9013157(CDC42 binds effectors at the plasma membrane);R-HSA-9014294(RAC2 binds effectors at th…	0.304166	0.273214	0.236945	0.346347	0.252935	0.306716	0.269419	0.284764	0.456794	0.570108	0.139911	0.600655	0.567662	0.661561	0.0260175	0.0122992	0.0671148	0.0274359	0.0436016	0.0411503	0.0227475	0.00600918	0.0313017	0	0.0337317	0	0.0252912	0.0493728	13.6534	3.77118	1.26167e-33	2.80063e-31	up	yes
ENSG00000143315	PIGM	93183	ENST00000368090	GO:0000030(mannosyltransferase activity);GO:0004376(glycolipid mannosyltransferase activity);GO:0005783(endoplasmic reticulum);GO:0005789(endoplasmic reticulum membrane);GO:0006506(GPI anchor biosynthetic process);GO:0016020(membrane);GO:0016021(integral component of membrane);GO:0016740(transferase activity);GO:0016757(glycosyltransferase activity);GO:0051751(alpha-1,4-mannosyltransferase activi…	00563(Glycosylphosphatidylinositol (GPI)-anchor biosynthesis);01100(Metabolic pathways)	NA	NA	NA	phosphatidylinositol glycan anchor biosynthesis class M [Source:HGNC Symbol;Acc:HGNC:18858]	protein_coding	NA	R-HSA-162830(glucosaminyl-acyl-PI + dolichol phosphate D-mannose -> mannose(al1-4)glucosaminyl-acyl-PI + dolichol phosphate)	0.899965	0.689616	0.998915	0.964269	1.0283	0.869767	0.770228	1.08525	1.61024	1.32804	1.20042	1.34085	1.38652	1.69609	0.438046	0.197027	0.358947	0.488546	0.291741	0.187184	0.469965	0.10573	0.130285	0.099345	0.368419	0.359015	0.282206	0.477096	3.73064	1.89942	1.49876e-33	3.30865e-31	up	yes
ENSG00000076984	MAP2K7	5609	ENST00000494348;ENST00000498118;ENST00000475022;ENST00000465324;ENST00000397983;ENST00000397981;ENST00000397979;ENST00000468058	GO:0000165(MAPK cascade);GO:0000166(nucleotide binding);GO:0000287(magnesium ion binding);GO:0001934(positive regulation of protein phosphorylation);GO:0004672(protein kinase activity);GO:0004674(protein serine/threonine kinase activity);GO:0004707(MAP kinase activity);GO:0004708(MAP kinase kinase activity);GO:0004712(protein serine/threonine/tyrosine kinase activity);GO:0004713(protein tyrosine …	04010(MAPK signaling pathway);04012(ErbB signaling pathway);04141(Protein processing in endoplasmic reticulum);04380(Osteoclast differentiation);04530(Tight junction);04620(Toll-like receptor signaling pathway);04660(T cell receptor signaling pathway);04664(Fc epsilon RI signaling pathway);04668(TNF signaling pathway);04722(Neurotrophin signaling pathway);04912(GnRH signaling pathway);04926(Relax…	K04431	EC:2.7.12.2	NA	mitogen-activated protein kinase kinase 7 [Source:HGNC Symbol;Acc:HGNC:6847]	retained_intron;protein_coding	DOID:0080001(bone_disease);DOID:14566(disease_of_cellular_proliferation);DOID:162(cancer);DOID:17(musculoskeletal_system_disease);DOID:3342(bone_inflammation_disease);DOID:4(disease);DOID:7148(rheumatoid_arthritis);DOID:7(disease_of_anatomical_entity);DOID:848(arthritis)	R-HSA-168162(Phosphorylation of human JNKs by activated MKK4/MKK7);R-HSA-2730868(Phosphorylation of MEK7 by MEKK1);R-HSA-450337(Activated TAK1 phosphorylates MKK4/MKK7);R-HSA-5211387(Anthrax lef cleaves target cell MAP2K7 (MEK7))	4.01994	2.61155	4.6813	3.14141	4.9285	6.14214	5.50276	7.35576	6.06962	5.51097	6.49011	6.42541	7.22508	6.66965	10.5393	6.31307	7.50367	9.99071	9.59743	6.15792	7.83848	5.0694	6.95517	2.8782	8.14067	8.10243	6.75229	10.3196	0.723205	-0.467524	1.77761e-33	3.90277e-31	down	no
ENSG00000198563	DDX39B	7919	ENST00000474961;ENST00000462421;ENST00000478365;ENST00000481456;ENST00000458640;ENST00000417023;ENST00000396172;ENST00000376177;ENST00000456662;ENST00000482195;ENST00000428450;ENST00000462256;ENST00000431908;ENST00000419020;ENST00000449757;ENST00000484566;ENST00000418897;ENST00000428098;ENST00000427214;ENST00000419338;ENST00000456976	GO:0000166(nucleotide binding);GO:0000245(spliceosomal complex assembly);GO:0000346(transcription export complex);GO:0000398(mRNA splicing, via spliceosome);GO:0003676(nucleic acid binding);GO:0003723(RNA binding);GO:0003724(RNA helicase activity);GO:0004386(helicase activity);GO:0005515(protein binding);GO:0005524(ATP binding);GO:0005634(nucleus);GO:0005654(nucleoplasm);GO:0005681(spliceosomal c…	03013(RNA transport);03015(mRNA surveillance pathway);03040(Spliceosome);03040(Spliceosome)	K12812	EC:3.6.4.13	NA	DExD-box helicase 39B [Source:HGNC Symbol;Acc:HGNC:13917]	retained_intron;processed_transcript;protein_coding;nonsense_mediated_decay	NA	R-HSA-159101(NXF1:NXT1 (TAP:p15) binds capped mRNA:CBC:EJC:TREX (minus DDX39B));R-HSA-72180(Cleavage of mRNA at the 3'-end);R-HSA-72185(mRNA polyadenylation);R-HSA-8849157(TREX complex binds spliced, capped mRNA:CBC:EJC cotranscriptionally);R-HSA-9018787(RHOBTB2 binds interacting proteins at the endosome membrane)	19.197	13.9489	26.4542	16.2785	24.9692	29.2037	28.6457	37.971	31.9869	24.6104	27.1627	30.0168	37.3123	38.0425	49.3215	29.8111	43.9339	51.7424	46.77	25.3988	34.0768	25.3136	27.8232	9.53875	32.7484	44.4979	34.6204	53.3186	0.758082	-0.399574	1.82078e-33	3.97583e-31	down	no
ENSG00000181704	YIPF6	286451	ENST00000462683;ENST00000462972;ENST00000374643;ENST00000451537;ENST00000470730;ENST00000374622;ENST00000496576	GO:0000138(Golgi trans cisterna);GO:0000139(Golgi membrane);GO:0005515(protein binding);GO:0005737(cytoplasm);GO:0005783(endoplasmic reticulum);GO:0005794(Golgi apparatus);GO:0005797(Golgi medial cisterna);GO:0005801(cis-Golgi network);GO:0005802(trans-Golgi network);GO:0006888(endoplasmic reticulum to Golgi vesicle-mediated transport);GO:0016020(membrane);GO:0016021(integral component of membran…	NA	NA	NA	NA	Yip1 domain family member 6 [Source:HGNC Symbol;Acc:HGNC:28304]	protein_coding;processed_transcript	NA	R-HSA-421831(trans-Golgi Network Coat Assembly);R-HSA-421833(Vamp And trans-Golgi Network AP-1 Binding Coupled With Cargo Capture);R-HSA-421835(trans-Golgi Network Vesicle Scission);R-HSA-421836(trans-Golgi Network Derived Vesicle Uncoating)	1.06508	0.892964	1.61909	0.88737	1.50212	1.62798	1.3378	2.02082	1.62966	1.45762	1.57306	1.42429	2.06135	1.92725	0.910776	0.603185	0.813403	0.810664	0.781665	0.410162	0.716222	0.347305	0.356416	0.115084	0.611487	0.867305	0.657625	0.876601	2.3684	1.24392	1.84391e-33	3.99279e-31	up	yes
ENSG00000214765	SEPTIN7P2	641977	ENST00000429741;ENST00000690179;ENST00000701857;ENST00000691119;ENST00000693141;ENST00000413357;ENST00000686398;ENST00000702737;ENST00000413875;ENST00000702610;ENST00000686032;ENST00000338231;ENST00000428867;ENST00000690342;ENST00000428414;ENST00000689783;ENST00000702903;ENST00000702700;ENST00000686085;ENST00000444755;ENST00000702829;ENST00000689506;ENST00000450436;ENST00000684893;ENST00000398921…	NA	NA	NA	NA	NA	septin 7 pseudogene 2 [Source:HGNC Symbol;Acc:HGNC:32339]	processed_transcript;retained_intron;transcribed_unprocessed_pseudogene	NA	NA	0.571785	0.343688	0.864861	0.50947	0.855578	1.17821	0.807711	1.19897	1.05297	0.974767	0.550273	0.94704	1.283	1.12288	2.61514	1.47147	1.81631	2.42051	2.10251	1.39284	1.64022	0.992254	1.27327	0.465631	1.73301	1.93848	1.2753	2.66165	0.515206	-0.956778	1.84842e-33	3.99279e-31	down	no
ENSG00000176563	CNTD1	124817	ENST00000588408;ENST00000592166;ENST00000585355;ENST00000586652	GO:0005634(nucleus);GO:0005694(chromosome);GO:0005737(cytoplasm);GO:0007131(reciprocal meiotic recombination);GO:0007283(spermatogenesis);GO:0035861(site of double-strand break);GO:0051321(meiotic cell cycle);GO:0051445(regulation of meiotic cell cycle);GO:0051445(regulation of meiotic cell cycle)	NA	NA	NA	NA	cyclin N-terminal domain containing 1 [Source:HGNC Symbol;Acc:HGNC:26847]	protein_coding;nonsense_mediated_decay	NA	NA	0.233983	0.230053	0.312713	0.165686	0.361735	0.393247	0.342091	0.366257	0.348239	0.299646	0.53851	0.325512	0.622875	0.237207	1.32583	1.40245	1.2841	1.81306	0.887499	1.13707	0.840014	0.928164	1.2799	0.607819	0.79389	0.943631	1.22441	1.18125	0.305305	-1.71167	2.12784e-33	4.55253e-31	down	yes
ENSG00000122729	ACO1	48	ENST00000309951;ENST00000379923;ENST00000541043	GO:0003723(RNA binding);GO:0003994(aconitate hydratase activity);GO:0005515(protein binding);GO:0005737(cytoplasm);GO:0005739(mitochondrion);GO:0005783(endoplasmic reticulum);GO:0005794(Golgi apparatus);GO:0005829(cytosol);GO:0006099(tricarboxylic acid cycle);GO:0006101(citrate metabolic process);GO:0006417(regulation of translation);GO:0006879(cellular iron ion homeostasis);GO:0009791(post-embry…	00020(Citrate cycle (TCA cycle));00630(Glyoxylate and dicarboxylate metabolism);01100(Metabolic pathways);01200(Carbon metabolism);01210(2-Oxocarboxylic acid metabolism);01230(Biosynthesis of amino acids);01230(Biosynthesis of amino acids)	K01681	EC:4.2.1.3	NA	aconitase 1 [Source:HGNC Symbol;Acc:HGNC:117]	protein_coding	DOID:0014667(disease_of_metabolism);DOID:0050117(disease_by_infectious_agent);DOID:0050686(organ_system_cancer);DOID:0050687(cell_type_cancer);DOID:0060158(acquired_metabolic_disease);DOID:11252(microcytic_anemia);DOID:11758(iron_deficiency_anemia);DOID:1398(parasitic_infectious_disease);DOID:14566(disease_of_cellular_proliferation);DOID:162(cancer);DOID:1909(melanoma);DOID:2113(coccidiosis);DOID…	R-HSA-5690873(ACO1 binds 4Fe-4S);R-HSA-5690886(ACO1, IREB2 bind IREs in TFRC, ALAD, FTL, FTH1 mRNAs);R-HSA-5690911(ACO1:4Fe-4S isomerises CIT to ISCIT)	0.99004	1.63403	2.15854	1.66616	1.84494	2.26274	1.40919	1.66427	2.45914	2.08156	2.62216	2.18944	2.48488	2.49031	0.625015	0.409654	0.83836	0.825948	0.694117	0.280309	0.623707	0.218671	0.268846	0.219778	0.677792	0.791938	0.725537	0.714674	3.5325	1.82069	2.13021e-33	4.55253e-31	up	yes
ENSG00000075218	GTSE1	51512	ENST00000454366;ENST00000491863;ENST00000466510;ENST00000479645	GO:0003674(molecular_function);GO:0005515(protein binding);GO:0005654(nucleoplasm);GO:0005737(cytoplasm);GO:0005829(cytosol);GO:0005856(cytoskeleton);GO:0005874(microtubule);GO:0005881(cytoplasmic microtubule);GO:0006977(DNA damage response, signal transduction by p53 class mediator resulting in cell cycle arrest);GO:0007017(microtubule-based process);GO:0008017(microtubule binding);GO:0015630(mi…	04115(p53 signaling pathway);04115(p53 signaling pathway)	NA	NA	NA	G2 and S-phase expressed 1 [Source:HGNC Symbol;Acc:HGNC:13698]	protein_coding;retained_intron	NA	R-HSA-8852280(GTSE1 binds microtubule lattice in interphase cells);R-HSA-8852298(GTSE1 binds MAPRE1 (EB1) at microtubule plus ends);R-HSA-8852306(Mitotic phosphorylation-induced dissociation of GTSE1 from microtubule plus ends);R-HSA-8852317(PLK1 phosphorylates GTSE1);R-HSA-8852324(GTSE1 binds PLK1);R-HSA-8852331(GTSE1 translocates to the nucleus);R-HSA-8852337(GTSE1 binds TP53);R-HSA-8852351(GTS…	0.731	0.744952	0.756257	0.939981	1.05436	0.85994	0.652849	1.0559	1.51519	3.43549	0.833827	1.68242	1.76555	2.68192	0.181657	0.0832735	0.280316	0.363593	0.184273	0.119645	0.172527	0.0818651	0.127911	0.094706	0.121619	0.106524	0.15564	0.145189	8.43256	3.07597	2.19707e-33	4.67057e-31	up	yes
ENSG00000105875	WDR91	29062	ENST00000485942;ENST00000684486;ENST00000462707;ENST00000683628;ENST00000423565;ENST00000683848;ENST00000479698;ENST00000474411;ENST00000682160;ENST00000354475;ENST00000682534;ENST00000682759;ENST00000682250;ENST00000497853;ENST00000682339;ENST00000476775;ENST00000684339;ENST00000682802;ENST00000466182;ENST00000684322	GO:0005515(protein binding);GO:0005768(endosome);GO:0005829(cytosol);GO:0010008(endosome membrane);GO:0016020(membrane);GO:0031313(extrinsic component of endosome membrane);GO:0031901(early endosome membrane);GO:0031902(late endosome membrane);GO:0035014(phosphatidylinositol 3-kinase regulator activity);GO:0042176(regulation of protein catabolic process);GO:0043551(regulation of phosphatidylinosi…	NA	NA	NA	NA	WD repeat domain 91 [Source:HGNC Symbol;Acc:HGNC:24997]	retained_intron;protein_coding;processed_transcript;nonsense_mediated_decay	NA	R-HSA-9013157(CDC42 binds effectors at the plasma membrane)	0.894508	0.4239	0.859066	0.546998	1.03906	1.29249	0.977253	1.51999	1.04145	1.05229	1.01215	1.03059	1.30361	1.55957	2.46701	1.25424	1.90009	2.70259	2.28249	1.24423	1.74902	1.29267	1.22738	0.38421	2.14979	2.44679	1.51727	2.79793	0.572596	-0.80441	4.02751e-33	8.51669e-31	down	no
ENSG00000101216	GMEB2	26205	ENST00000370077;ENST00000370069;ENST00000266068	GO:0000785(chromatin);GO:0000978(RNA polymerase II cis-regulatory region sequence-specific DNA binding);GO:0000981(DNA-binding transcription factor activity, RNA polymerase II-specific);GO:0001228(DNA-binding transcription activator activity, RNA polymerase II-specific);GO:0003677(DNA binding);GO:0005515(protein binding);GO:0005634(nucleus);GO:0005654(nucleoplasm);GO:0005737(cytoplasm);GO:0005829…	NA	NA	NA	SAND	glucocorticoid modulatory element binding protein 2 [Source:HGNC Symbol;Acc:HGNC:4371]	protein_coding	NA	NA	5.39561	2.69261	4.69771	2.71697	4.38631	5.4203	5.43146	7.37341	5.85209	4.69145	6.09684	6.1184	5.84077	7.05092	10.7191	7.54475	8.92476	11.6993	10.712	7.66815	10.853	6.9674	8.75015	2.98135	8.2847	9.79232	8.54469	14.3634	0.577167	-0.79294	4.63221e-33	9.74413e-31	down	no
ENSG00000120705	ETF1	2107	ENST00000512198;ENST00000360541;ENST00000506345;ENST00000503183;ENST00000507939;ENST00000503014;ENST00000572514;ENST00000499810	GO:0000184(nuclear-transcribed mRNA catabolic process, nonsense-mediated decay);GO:0002184(cytoplasmic translational termination);GO:0003723(RNA binding);GO:0003747(translation release factor activity);GO:0005515(protein binding);GO:0005737(cytoplasm);GO:0005829(cytosol);GO:0006412(translation);GO:0006415(translational termination);GO:0006449(regulation of translational termination);GO:0006479(pr…	03015(mRNA surveillance pathway);03015(mRNA surveillance pathway)	NA	NA	NA	eukaryotic translation termination factor 1 [Source:HGNC Symbol;Acc:HGNC:3477]	nonsense_mediated_decay;protein_coding;retained_intron	NA	R-HSA-141671(Polypeptide release from the eRF3-GDP:eRF1:mRNA:80S Ribosome complex);R-HSA-141673(GTP Hydrolysis by eRF3 bound to the eRF1:mRNA:polypeptide:80S Ribosome complex);R-HSA-141691(GTP bound eRF3:eRF1 complex binds the peptidyl tRNA:mRNA:80S Ribosome complex);R-HSA-6800138(N6AMT1:TRMT112 transfers CH3 group from AdoMet to ETF1 dimer);R-HSA-9014610(Translation of ROBO3.2 mRNA initiates NMD…	6.24094	5.76012	6.6995	6.6044	8.71071	14.9246	8.7599	11.6531	12.4707	11.0571	8.82607	10.1411	18.3534	15.8633	21.6828	13.3433	24.9826	23.9031	20.9885	14.5613	17.1805	8.98717	18.9906	4.77277	17.6268	22.7685	17.1735	29.454	0.569642	-0.811873	4.66615e-33	9.7644e-31	down	no
ENSG00000095574	IKZF5	64376	ENST00000617859;ENST00000368886;ENST00000479103;ENST00000469821;ENST00000496605	GO:0000122(negative regulation of transcription by RNA polymerase II);GO:0000977(RNA polymerase II transcription regulatory region sequence-specific DNA binding);GO:0000978(RNA polymerase II cis-regulatory region sequence-specific DNA binding);GO:0001227(DNA-binding transcription repressor activity, RNA polymerase II-specific);GO:0003677(DNA binding);GO:0003682(chromatin binding);GO:0003700(DNA-b…	NA	NA	NA	zf-C2H2	IKAROS family zinc finger 5 [Source:HGNC Symbol;Acc:HGNC:14283]	protein_coding;processed_transcript	NA	NA	2.46182	1.88718	3.12473	1.90944	2.94756	5.46469	3.61648	5.28224	3.80324	3.44862	3.90055	3.12928	5.71917	5.06037	8.66786	6.50246	10.1795	11.9446	12.1649	6.4061	7.06002	3.11521	4.00409	1.52917	8.26434	12.5728	5.76315	11.5181	0.471823	-1.08368	6.72898e-33	1.40081e-30	down	yes
ENSG00000164082	GRM2	2912	ENST00000464585;ENST00000395052;ENST00000296479;ENST00000496661;ENST00000477330	GO:0001640(adenylate cyclase inhibiting G protein-coupled glutamate receptor activity);GO:0001641(group II metabotropic glutamate receptor activity);GO:0004930(G protein-coupled receptor activity);GO:0005246(calcium channel regulator activity);GO:0005515(protein binding);GO:0005886(plasma membrane);GO:0005887(integral component of plasma membrane);GO:0007154(cell communication);GO:0007165(signal …	04072(Phospholipase D signaling pathway);04080(Neuroactive ligand-receptor interaction);04724(Glutamatergic synapse);05030(Cocaine addiction);05030(Cocaine addiction)	NA	NA	NA	glutamate metabotropic receptor 2 [Source:HGNC Symbol;Acc:HGNC:4594]	retained_intron;protein_coding;nonsense_mediated_decay;processed_transcript	DOID:10652(Alzheimer's_disease);DOID:1289(neurodegenerative_disease);DOID:1307(dementia);DOID:150(disease_of_mental_health);DOID:1561(cognitive_disorder);DOID:230(lateral_sclerosis);DOID:231(motor_neuron_disease);DOID:2468(psychotic_disorder);DOID:3312(bipolar_disorder);DOID:331(central_nervous_system_disease);DOID:3324(mood_disorder);DOID:332(amyotrophic_lateral_sclerosis);DOID:4(disease);DOID:5…	R-HSA-373075(Metabotropic glutamate receptors bind glutamate);R-HSA-380073(Liganded Gi-activating GPCR acts as a GEF for Gi);R-HSA-749454(The Ligand:GPCR:Gi complex dissociates);R-HSA-749456(Liganded Gi-activating GPCRs bind inactive heterotrimeric G-protein Gi)	0.0587081	0.0503948	0.0486298	0.0169757	0.0703164	0.0983489	0.0487817	0.0490549	0.0927588	0.0336313	0.0115257	0.104279	0.0515575	0.102685	0.289402	0.486601	0.342388	0.564148	0.454036	0.221309	0.240581	0.206464	0.312353	0.0805314	0.371774	0.366918	0.330724	0.343185	0.181686	-2.46048	7.28796e-33	1.50936e-30	down	yes
ENSG00000099194	SCD	6319	ENST00000370355	GO:0004768(stearoyl-CoA 9-desaturase activity);GO:0005506(iron ion binding);GO:0005515(protein binding);GO:0005730(nucleolus);GO:0005783(endoplasmic reticulum);GO:0005789(endoplasmic reticulum membrane);GO:0006629(lipid metabolic process);GO:0006631(fatty acid metabolic process);GO:0006633(fatty acid biosynthetic process);GO:0006636(unsaturated fatty acid biosynthetic process);GO:0008610(lipid bi…	01040(Biosynthesis of unsaturated fatty acids);01100(Metabolic pathways);01212(Fatty acid metabolism);03320(PPAR signaling pathway);04152(AMPK signaling pathway)	K00507	EC:1.14.19.1	NA	stearoyl-CoA desaturase [Source:HGNC Symbol;Acc:HGNC:10571]	protein_coding	DOID:0014667(disease_of_metabolism);DOID:0050013(carbohydrate_metabolism_disease);DOID:0050177(monogenic_disease);DOID:0050615(respiratory_system_cancer);DOID:0050686(organ_system_cancer);DOID:0050737(autosomal_recessive_disease);DOID:0050739(autosomal_genetic_disease);DOID:0050828(artery_disease);DOID:0060158(acquired_metabolic_disease);DOID:10283(prostate_cancer);DOID:10286(prostate_carcinoma);…	R-HSA-1655849(Expression of Acyl-CoA Desaturase (Stearoyl CoA Desaturase, SCD));R-HSA-5690565(SCD desaturates ST-CoA to OLE-CoA);R-HSA-9605060(Expression of SCD regulated by NR1H2 or NR1H3)	5.41289	5.41957	4.75066	6.22468	5.82407	5.61312	5.59943	6.78678	6.95504	8.16116	3.17855	7.31445	8.18724	10.4463	1.50488	1.43624	1.9404	1.55621	2.042	0.341468	0.705347	0.245609	0.594537	0.263376	0.594538	0.762385	1.08511	1.67962	6.09244	2.60702	7.96141e-33	1.64038e-30	up	yes
ENSG00000185220	PGBD2	267002	ENST00000355360;ENST00000329291;ENST00000462488	GO:0043565(sequence-specific DNA binding);GO:0043565(sequence-specific DNA binding)	NA	NA	NA	NA	piggyBac transposable element derived 2 [Source:HGNC Symbol;Acc:HGNC:19399]	protein_coding;processed_transcript	NA	NA	0.957601	0.506542	1.57156	0.931068	1.4386	1.05199	1.72035	1.88778	1.90779	1.50192	1.55563	1.60682	2.1572	1.97939	0.566028	0.438231	0.295231	0.476291	0.483674	0.380229	0.507909	0.116908	0.287776	0.0949872	0.243245	0.400957	0.392581	0.461551	4.03728	2.01338	8.18654e-33	1.67816e-30	up	yes
ENSG00000204569	PPP1R10	5514	ENST00000376511;ENST00000476704;ENST00000484449;ENST00000461593;ENST00000468181;ENST00000496955;ENST00000473954	GO:0000781(chromosome, telomeric region);GO:0000785(chromatin);GO:0003677(DNA binding);GO:0003723(RNA binding);GO:0004864(protein phosphatase inhibitor activity);GO:0005515(protein binding);GO:0005634(nucleus);GO:0005654(nucleoplasm);GO:0006606(protein import into nucleus);GO:0008157(protein phosphatase 1 binding);GO:0010667(negative regulation of cardiac muscle cell apoptotic process);GO:0016604…	NA	NA	NA	NA	protein phosphatase 1 regulatory subunit 10 [Source:HGNC Symbol;Acc:HGNC:9284]	protein_coding;retained_intron;processed_transcript	DOID:10652(Alzheimer's_disease);DOID:1289(neurodegenerative_disease);DOID:1307(dementia);DOID:14566(disease_of_cellular_proliferation);DOID:150(disease_of_mental_health);DOID:1561(cognitive_disorder);DOID:162(cancer);DOID:331(central_nervous_system_disease);DOID:4(disease);DOID:680(tauopathy);DOID:7(disease_of_anatomical_entity);DOID:863(nervous_system_disease)	NA	7.70238	6.1011	9.36317	5.7624	9.04996	9.31515	8.10396	9.20958	10.083	12.9736	17.725	10.5845	13.0284	13.5405	4.56994	2.81991	4.48981	4.56743	5.98836	1.94116	3.53403	2.09905	1.77316	0.960696	3.10089	3.96696	4.39541	4.94882	2.89982	1.53597	8.49565e-33	1.73268e-30	up	yes
ENSG00000129474	AJUBA	84962	ENST00000262713;ENST00000397388;ENST00000555479;ENST00000553911;ENST00000556731;ENST00000553736	GO:0000122(negative regulation of transcription by RNA polymerase II);GO:0000932(P-body);GO:0001666(response to hypoxia);GO:0003682(chromatin binding);GO:0003714(transcription corepressor activity);GO:0005515(protein binding);GO:0005634(nucleus);GO:0005654(nucleoplasm);GO:0005667(transcription regulator complex);GO:0005737(cytoplasm);GO:0005794(Golgi apparatus);GO:0005815(microtubule organizing c…	04390(Hippo signaling pathway);04392(Hippo signaling pathway - multiple species);04392(Hippo signaling pathway - multiple species)	NA	NA	NA	ajuba LIM protein [Source:HGNC Symbol;Acc:HGNC:20250]	protein_coding;retained_intron	NA	R-HSA-1234159(Proteasome proteolyzes ub-HIF-alpha);R-HSA-1234163(Cytosolic VBC complex ubiquitinylates hydroxyprolyl-HIF-alpha );R-HSA-1234173(Cytosolic PHD2,3 hydroxylates proline residues on HIF3A);R-HSA-1234177(Cytosolic PHD2,3 hydroxylates proline residues on HIF1A);R-HSA-1234179(Cytosolic PHD2,3 hydroxylates proline residues on EPAS1 (HIF2A));R-HSA-1234183(Cytosolic VHL:EloB,C:CUL2:RBX1 bind…	0.667949	0.97573	0.641826	0.926048	0.869122	0.999755	0.94312	0.926615	1.11686	1.41602	0.152485	1.45492	1.2233	1.48368	0.0861682	0.106768	0.164807	0.12266	0.106521	0.075983	0.0742858	0.0257157	0.0604973	0.0791492	0.103291	0.0467361	0.0365717	0.124762	11.366	3.50666	9.09538e-33	1.84563e-30	up	yes
ENSG00000121966	CXCR4	7852	ENST00000241393;ENST00000409817;ENST00000696137;ENST00000696136;ENST00000696228;ENST00000696152;ENST00000466288	GO:0001618(virus receptor activity);GO:0001666(response to hypoxia);GO:0001764(neuron migration);GO:0002064(epithelial cell development);GO:0002407(dendritic cell chemotaxis);GO:0003779(actin binding);GO:0004930(G protein-coupled receptor activity);GO:0004950(chemokine receptor activity);GO:0005515(protein binding);GO:0005634(nucleus);GO:0005737(cytoplasm);GO:0005764(lysosome);GO:0005768(endosome…	04020(Calcium signaling pathway);04060(Cytokine-cytokine receptor interaction);04061(Viral protein interaction with cytokine and cytokine receptor);04062(Chemokine signaling pathway);04144(Endocytosis);04360(Axon guidance);04670(Leukocyte transendothelial migration);04672(Intestinal immune network for IgA production);04810(Regulation of actin cytoskeleton);05163(Human cytomegalovirus infection);0…	NA	NA	NA	C-X-C motif chemokine receptor 4 [Source:HGNC Symbol;Acc:HGNC:2561]	protein_coding	DOID:0014667(disease_of_metabolism);DOID:0050013(carbohydrate_metabolism_disease);DOID:0050117(disease_by_infectious_agent);DOID:0050161(lower_respiratory_tract_disease);DOID:0050177(monogenic_disease);DOID:0050338(primary_bacterial_infectious_disease);DOID:0050615(respiratory_system_cancer);DOID:0050686(organ_system_cancer);DOID:0050687(cell_type_cancer);DOID:0050736(autosomal_dominant_disease);…	R-HSA-164500(Conformational changes in gp120 exposes gp41);R-HSA-164507(CD4:gp120 binds to chemokine co-receptor CCR5/CXCR4);R-HSA-164508(N and C terminal heptad repeat helices of gp41 form six-helix bundle);R-HSA-164515(Fusogenic activation of gp41);R-HSA-164521(Insertion of gp41 fusion peptide into the target membrane);R-HSA-164524(Fusion of viral membrane with host cell membrane);R-HSA-374214(…	55.1688	33.3428	44.3539	29.5632	50.1122	127.316	82.7781	104.432	45.102	48.4688	82.4543	75.5452	69.9467	82.8214	187.531	123.074	154.236	200.469	362.857	171.338	183.915	111.258	177.435	48.7605	164.799	265.428	136.873	231.668	0.369658	-1.43574	1.14952e-32	2.32087e-30	down	yes
ENSG00000279908	ENSG00000279908		ENST00000624349	NA	NA	NA	NA	NA	tec	TEC	NA	NA	0.053884	0.074459	0.117678	0.104911	0.080367	0.292543	0.24318	0.295291	0.15543	0.109808	0.240332	0.257432	0.340182	0.285913	1.16566	0.414853	0.675994	0.844538	1.54854	0.510948	0.821307	0.273429	0.87022	0.18166	0.454765	0.800534	0.790141	1.25404	0.249977	-2.00013	1.18605e-32	2.38265e-30	down	yes
ENSG00000162889	MAPKAPK2	9261	ENST00000367103;ENST00000479009;ENST00000493447;ENST00000294981	GO:0000165(MAPK cascade);GO:0000166(nucleotide binding);GO:0002224(toll-like receptor signaling pathway);GO:0004672(protein kinase activity);GO:0004674(protein serine/threonine kinase activity);GO:0004683(calmodulin-dependent protein kinase activity);GO:0004712(protein serine/threonine/tyrosine kinase activity);GO:0005515(protein binding);GO:0005516(calmodulin binding);GO:0005524(ATP binding);GO:…	04010(MAPK signaling pathway);04218(Cellular senescence);04370(VEGF signaling pathway);04625(C-type lectin receptor signaling pathway);04722(Neurotrophin signaling pathway);05167(Kaposi sarcoma-associated herpesvirus infection);05203(Viral carcinogenesis);05203(Viral carcinogenesis)	K04443	EC:2.7.11.1	NA	MAPK activated protein kinase 2 [Source:HGNC Symbol;Acc:HGNC:6887]	protein_coding;processed_transcript	DOID:0050686(organ_system_cancer);DOID:0060083(immune_system_cancer);DOID:0070004(myeloma);DOID:14566(disease_of_cellular_proliferation);DOID:162(cancer);DOID:2531(hematologic_cancer);DOID:4960(bone_marrow_cancer);DOID:4(disease);DOID:9538(multiple_myeloma)	R-HSA-187688(p38 MAPK phosphorylates MAPKAPK2, MAPKAPK3);R-HSA-199917(MAPKAPK2 phosphorylates CREB at Serine 133);R-HSA-429016(ALOX5 is phosphorylated by MAPKAP2);R-HSA-450222(Active p38 MAPK phosphorylates MAPKAPK2 or 3);R-HSA-450257(Nuclear export of human p38 MAPK mediated by its substrate MAPKAPK2 or 3);R-HSA-450333(Activated human MKK3/MKK6 phosphorylates p38 MAPK complexed with MAPKAPK2 or …	25.3622	14.9079	19.8016	12.7171	18.5429	28.384	24.7684	25.3914	22.8428	22.1204	29.8345	23.1361	28.4168	25.4366	49.8476	35.3634	50.5859	50.1035	49.7199	34.7843	45.2781	33.8514	45.1193	16.7576	42.5574	47.0531	35.8912	64.7224	0.534648	-0.903339	1.4072e-32	2.81285e-30	down	no
ENSG00000100485	SOS2	6655	ENST00000555794;ENST00000556452;ENST00000216373;ENST00000543680;ENST00000556469;ENST00000555666	GO:0001782(B cell homeostasis);GO:0002260(lymphocyte homeostasis);GO:0003677(DNA binding);GO:0005085(guanyl-nucleotide exchange factor activity);GO:0005515(protein binding);GO:0005829(cytosol);GO:0005886(plasma membrane);GO:0007264(small GTPase mediated signal transduction);GO:0007265(Ras protein signal transduction);GO:0033081(regulation of T cell differentiation in thymus);GO:0042129(regulation…	01521(EGFR tyrosine kinase inhibitor resistance);01522(Endocrine resistance);04010(MAPK signaling pathway);04012(ErbB signaling pathway);04014(Ras signaling pathway);04062(Chemokine signaling pathway);04068(FoxO signaling pathway);04072(Phospholipase D signaling pathway);04150(mTOR signaling pathway);04151(PI3K-Akt signaling pathway);04510(Focal adhesion);04540(Gap junction);04630(JAK-STAT signal…	NA	NA	NA	SOS Ras/Rho guanine nucleotide exchange factor 2 [Source:HGNC Symbol;Acc:HGNC:11188]	protein_coding;nonsense_mediated_decay;processed_transcript	DOID:10652(Alzheimer's_disease);DOID:1289(neurodegenerative_disease);DOID:1307(dementia);DOID:150(disease_of_mental_health);DOID:1561(cognitive_disorder);DOID:331(central_nervous_system_disease);DOID:4(disease);DOID:680(tauopathy);DOID:7(disease_of_anatomical_entity);DOID:863(nervous_system_disease)	R-HSA-205039(p75NTR indirectly activates RAC and Cdc42 via a guanyl-nucleotide exchange factor);R-HSA-419166(GEFs activate RhoA,B,C);R-HSA-428515(Recruitment of SOS to plasma membrane);R-HSA-428535(Activation of RAC1 by SOS);R-HSA-8983384(IL15:IL15RA:p-Y-IL2RB:p-Y-JAK1:p-Y-IL2RG:p-Y-JAK3:p-Y-SHC1:GRB2 binds SOS1,SOS2);R-HSA-9013143(RAC1 GEFs activate RAC1)	8.42457	4.81194	8.62264	5.38798	7.82413	13.4397	10.9453	20.8377	7.5072	5.95557	8.53831	7.16987	13.5299	12.3789	11.0804	5.81306	12.653	13.7717	10.0235	5.25597	10.0887	3.73287	3.3905	1.21172	13.0499	12.8863	5.93908	11.9206	1.12048	0.16412	0.83396	0.990625	up	no
ENSG00000230701	FBXW4P1	26226	ENST00000426721	NA	NA	NA	NA	NA	F-box and WD repeat domain containing 4 pseudogene 1 [Source:HGNC Symbol;Acc:HGNC:13609]	processed_pseudogene	NA	NA	0.023982	0.027096	0.01985	0.14041	0.123063	0.219491	0.233675	0.175548	0.230398	0.169459	0.050548	0.089183	0.061097	0.16538	1.15501	0.913024	0.71226	1.13396	0.79952	0.976639	0.668724	0.620204	1.04848	0.356774	0.61233	1.36227	0.571253	1.12157	0.143476	-2.80112	2.78031e-32	5.50282e-30	down	yes
ENSG00000100941	PNN	5411	ENST00000216832;ENST00000556530;ENST00000557680;ENST00000553331;ENST00000554117;ENST00000554902	GO:0000398(mRNA splicing, via spliceosome);GO:0003677(DNA binding);GO:0003723(RNA binding);GO:0005198(structural molecule activity);GO:0005515(protein binding);GO:0005634(nucleus);GO:0005681(spliceosomal complex);GO:0005882(intermediate filament);GO:0005886(plasma membrane);GO:0005911(cell-cell junction);GO:0006397(mRNA processing);GO:0007155(cell adhesion);GO:0008380(RNA splicing);GO:0016020(mem…	03013(RNA transport);03015(mRNA surveillance pathway);03015(mRNA surveillance pathway)	NA	NA	NA	pinin, desmosome associated protein [Source:HGNC Symbol;Acc:HGNC:9162]	protein_coding;processed_transcript;retained_intron	NA	NA	8.00157	5.56064	12.2506	6.92093	10.4604	13.6182	11.4622	17.817	12.2053	10.8589	11.4392	13.2221	15.6756	17.5982	22.8085	14.8173	22.1731	27.7591	23.3803	13.8295	17.9425	8.00815	14.2565	4.81044	16.2271	21.9341	14.7701	26.4514	0.670594	-0.576488	3.32156e-32	6.52985e-30	down	no
ENSG00000186166	CENATAC	338657	ENST00000528088;ENST00000533787;ENST00000580556;ENST00000527356;ENST00000583842;ENST00000526463;ENST00000532132;ENST00000334418;ENST00000534656;ENST00000524670	GO:0005515(protein binding);GO:0005737(cytoplasm);GO:0005813(centrosome);GO:0005815(microtubule organizing center);GO:0005856(cytoskeleton);GO:0010826(negative regulation of centrosome duplication);GO:0042176(regulation of protein catabolic process);GO:0042176(regulation of protein catabolic process)	NA	NA	NA	NA	centrosomal AT-AC splicing factor [Source:HGNC Symbol;Acc:HGNC:30460]	retained_intron;processed_transcript;nonsense_mediated_decay;protein_coding	NA	NA	1.63905	1.4898	2.78278	1.17718	2.50326	2.96266	2.09493	3.21043	2.49046	2.09214	2.05139	2.39697	2.89672	2.84509	6.22638	3.16016	4.44036	5.35814	6.32375	3.04782	4.10201	2.90439	4.64784	2.09603	4.10723	5.28002	4.17398	5.87196	0.528552	-0.919882	3.33172e-32	6.52985e-30	down	no
ENSG00000104738	MCM4	4173	ENST00000649973;ENST00000262105;ENST00000697123;ENST00000697120;ENST00000519138;ENST00000517709;ENST00000649919;ENST00000521261;ENST00000519170;ENST00000519470;ENST00000648519;ENST00000520637;ENST00000521151;ENST00000648407;ENST00000697121;ENST00000648554;ENST00000523853;ENST00000520994;ENST00000649838;ENST00000524086;ENST00000518680;ENST00000648533	GO:0000166(nucleotide binding);GO:0000727(double-strand break repair via break-induced replication);GO:0000781(chromosome, telomeric region);GO:0003677(DNA binding);GO:0003678(DNA helicase activity);GO:0003697(single-stranded DNA binding);GO:0004386(helicase activity);GO:0005515(protein binding);GO:0005524(ATP binding);GO:0005634(nucleus);GO:0005654(nucleoplasm);GO:0005694(chromosome);GO:0006259(…	03030(DNA replication);04110(Cell cycle);04110(Cell cycle)	K02212	EC:3.6.4.12	NA	minichromosome maintenance complex component 4 [Source:HGNC Symbol;Acc:HGNC:6947]	protein_coding;retained_intron;nonsense_mediated_decay;processed_transcript	DOID:12554(hemolytic_uremic_syndrome);DOID:14566(disease_of_cellular_proliferation);DOID:162(cancer);DOID:2355(anemia);DOID:2914(immune_system_disease);DOID:4(disease);DOID:583(hemolytic_anemia);DOID:720(normocytic_anemia);DOID:74(hematopoietic_system_disease);DOID:7(disease_of_anatomical_entity)	R-HSA-169468(MCM2-7 mediated fork unwinding);R-HSA-176298(Activation of claspin);R-HSA-176318(Loading of claspin onto DNA during replication origin firing);R-HSA-176942(Multiple proteins are localized at replication fork);R-HSA-68914(DNA polymerase alpha:primase binds at the origin);R-HSA-68916(DNA Replication Factor A (RPA) associates with the pre-replicative complex at the origin);R-HSA-68917(C…	2.0246	1.72947	1.74488	1.78629	2.27905	1.99459	1.84217	2.53961	4.63032	4.26514	2.39525	2.98984	4.46698	4.92262	0.633676	0.330804	0.958536	0.828887	0.580217	0.731419	0.625603	0.216079	0.521343	0.15501	0.581312	0.867357	0.951123	0.736391	4.54369	2.18387	3.43793e-32	6.7053e-30	up	yes
ENSG00000167615	LENG8	114823	ENST00000610347;ENST00000376514;ENST00000326764;ENST00000462541;ENST00000439657;ENST00000616932;ENST00000443957;ENST00000421200;ENST00000436479	GO:0005515(protein binding);GO:0005634(nucleus);GO:0032991(protein-containing complex);GO:0032991(protein-containing complex)	NA	NA	NA	NA	leukocyte receptor cluster member 8 [Source:HGNC Symbol;Acc:HGNC:15500]	protein_coding;retained_intron	NA	NA	21.1026	16.3686	31.6928	14.8605	22.011	34.4415	29.6113	37.7748	26.9431	24.0743	24.5956	28.8894	27.0371	34.2991	60.7521	42.143	58.1737	71.7872	64.1358	32.4379	36.1946	31.0276	31.3189	12.1024	46.4799	62.1607	44.7166	64.1782	0.568274	-0.815342	3.6099e-32	7.00669e-30	down	no
ENSG00000138768	USO1	8615	ENST00000264904;ENST00000514213;ENST00000508454;ENST00000512893	GO:0000139(Golgi membrane);GO:0001650(fibrillar center);GO:0003723(RNA binding);GO:0005515(protein binding);GO:0005737(cytoplasm);GO:0005783(endoplasmic reticulum);GO:0005794(Golgi apparatus);GO:0005795(Golgi stack);GO:0005815(microtubule organizing center);GO:0005829(cytosol);GO:0006886(intracellular protein transport);GO:0006888(endoplasmic reticulum to Golgi vesicle-mediated transport);GO:0007…	NA	NA	NA	NA	USO1 vesicle transport factor [Source:HGNC Symbol;Acc:HGNC:30904]	protein_coding;retained_intron	NA	R-HSA-2172183(Phosphorylation of GORASP1, GOLGA2 and RAB1A by CDK1:CCNB);R-HSA-5694418(RAB1:GTP binds USO1 and GORASP1:GOLGA2);R-HSA-5694441(CSNK1D phosphorylates SEC23);R-HSA-5694446(BET1:GOSR2:STX5 bind v-SNARES on tethered vesicle);R-HSA-6807864(RAB1:GTP recruits GBF1 to the ERGIC);R-HSA-6807866(GBF1 recruits ARF:GDP to the ERGIC);R-HSA-6807868(GBF1 stimulates ARF nucleotide exchange);R-HSA-68…	4.50623	4.21465	6.24647	5.90555	6.34327	7.69481	5.73173	10.8544	8.56368	10.3307	8.31374	7.5981	13.1921	11.244	3.3583	2.37792	3.49387	4.45549	4.54263	1.83421	2.43554	1.12931	1.27846	0.685086	3.41997	3.90025	2.73704	3.53916	2.8259	1.49871	3.66845e-32	7.0861e-30	up	yes
ENSG00000185551	NR2F2	7026	ENST00000394166;ENST00000453270;ENST00000421109;ENST00000559679;ENST00000394171	GO:0000122(negative regulation of transcription by RNA polymerase II);GO:0000978(RNA polymerase II cis-regulatory region sequence-specific DNA binding);GO:0001701(in utero embryonic development);GO:0001764(neuron migration);GO:0001893(maternal placenta development);GO:0001937(negative regulation of endothelial cell proliferation);GO:0001945(lymph vessel development);GO:0001972(retinoic acid bindi…	NA	NA	NA	RXR-like	nuclear receptor subfamily 2 group F member 2 [Source:HGNC Symbol;Acc:HGNC:7976]	protein_coding	DOID:14566(disease_of_cellular_proliferation);DOID:162(cancer);DOID:4(disease)	R-HSA-381283(Expression of PPARG)	2.33559	2.24556	1.73061	2.88651	2.3136	2.44964	2.41233	2.32411	2.54517	3.16286	0.0253337	2.85241	2.4223	2.84112	0.155899	0.128801	0.230088	0.138289	0.105013	0.0689735	0.156896	0.0266089	0.108919	0.0930752	0.0629939	0.0772232	0.0233384	0.122021	21.7251	4.44129	3.90111e-32	7.49946e-30	up	yes
ENSG00000163535	SGO2	151246	ENST00000357799;ENST00000409203;ENST00000488636;ENST00000418045;ENST00000469840	GO:0000070(mitotic sister chromatid segregation);GO:0000775(chromosome, centromeric region);GO:0000776(kinetochore);GO:0000793(condensed chromosome);GO:0005515(protein binding);GO:0005634(nucleus);GO:0005654(nucleoplasm);GO:0005694(chromosome);GO:0005829(cytosol);GO:0007049(cell cycle);GO:0007059(chromosome segregation);GO:0016604(nuclear body);GO:0030892(mitotic cohesin complex);GO:0045143(homol…	NA	NA	NA	NA	shugoshin 2 [Source:HGNC Symbol;Acc:HGNC:30812]	protein_coding;retained_intron;processed_transcript	NA	R-HSA-141409(Mad1 binds kinetochore);R-HSA-141422(MAD2 converted to an inhibitory state via interaction with Mad1);R-HSA-141431(MAD2 associates with the Mad1 kinetochore complex);R-HSA-141439(Release of activated MAD2 from kinetochores);R-HSA-1638803(Phosphorylation of cohesin by PLK1 at centromeres);R-HSA-1638821(PP2A-B56 dephosphorylates centromeric cohesin);R-HSA-2467809(ESPL1 (Separase) cleav…	0.371829	0.298215	0.279931	0.383476	0.484187	0.33881	0.381772	0.613396	0.86256	0.804845	0.433752	0.742839	0.931082	1.02604	0.132875	0.0613992	0.0956582	0.139116	0.103339	0.110271	0.131425	0.0186315	0.093209	0.0512051	0.0806337	0.0996892	0.108434	0.0772317	6.10285	2.60948	4.32874e-32	8.28191e-30	up	yes
ENSG00000070961	ATP2B1	490	ENST00000549727;ENST00000552275;ENST00000428670;ENST00000551009;ENST00000359142;ENST00000550716;ENST00000551310;ENST00000635033;ENST00000549585;ENST00000393164;ENST00000261173	GO:0000166(nucleotide binding);GO:0001772(immunological synapse);GO:0001818(negative regulation of cytokine production);GO:0003056(regulation of vascular associated smooth muscle contraction);GO:0003407(neural retina development);GO:0005215(transporter activity);GO:0005388(P-type calcium transporter activity);GO:0005515(protein binding);GO:0005516(calmodulin binding);GO:0005524(ATP binding);GO:00…	04020(Calcium signaling pathway);04022(cGMP-PKG signaling pathway);04024(cAMP signaling pathway);04261(Adrenergic signaling in cardiomyocytes);04925(Aldosterone synthesis and secretion);04961(Endocrine and other factor-regulated calcium reabsorption);04970(Salivary secretion);04972(Pancreatic secretion);04978(Mineral absorption);04978(Mineral absorption)	K05850	EC:7.2.2.10	NA	ATPase plasma membrane Ca2+ transporting 1 [Source:HGNC Symbol;Acc:HGNC:814]	retained_intron;protein_coding	DOID:0050828(artery_disease);DOID:0080015(physical_disorder);DOID:10763(hypertension);DOID:11383(cryptorchidism);DOID:1287(cardiovascular_system_disease);DOID:14566(disease_of_cellular_proliferation);DOID:15(reproductive_system_disease);DOID:162(cancer);DOID:178(vascular_disease);DOID:48(male_reproductive_system_disease);DOID:4(disease);DOID:7(disease_of_anatomical_entity);DOID:9912(hydrocele)	R-HSA-418309(ATP2B1-4 transport cytosolic Ca2+ to extracellular region);R-HSA-9664214(ATP2B1 (PMCA1) transports Ca2+ from the cytosol to the extracellular region)	4.914	3.13849	7.19883	4.00128	7.37668	8.39768	5.50403	8.65548	5.86323	5.75057	6.8278	6.41619	10.9597	9.73619	19.6114	10.4549	21.253	15.8137	18.1596	10.4074	12.6577	6.43019	7.62755	2.41156	13.2848	17.4734	12.9958	21.1311	0.499388	-1.00177	4.36599e-32	8.31359e-30	down	yes
ENSG00000149485	FADS1	3992,4593	ENST00000350997;ENST00000466716;ENST00000424501;ENST00000541683;ENST00000544309;ENST00000542506;ENST00000460649;ENST00000448607;ENST00000545245;ENST00000473263;ENST00000539999;ENST00000433932;ENST00000545986;ENST00000536991;ENST00000540767;ENST00000491310;ENST00000421879;ENST00000496123	GO:0000248(C-5 sterol desaturase activity);GO:0005739(mitochondrion);GO:0005783(endoplasmic reticulum);GO:0005789(endoplasmic reticulum membrane);GO:0006355(regulation of DNA-templated transcription);GO:0006629(lipid metabolic process);GO:0006631(fatty acid metabolic process);GO:0006633(fatty acid biosynthetic process);GO:0006636(unsaturated fatty acid biosynthetic process);GO:0007267(cell-cell s…	01040(Biosynthesis of unsaturated fatty acids);01100(Metabolic pathways);01212(Fatty acid metabolism);01212(Fatty acid metabolism)	K10224	EC:1.14.19.44	NA	fatty acid desaturase 1 [Source:HGNC Symbol;Acc:HGNC:3574]	protein_coding;nonsense_mediated_decay;processed_transcript	NA	R-HSA-1989757(Expression of FADS1);R-HSA-2046089(Desaturation of eicosatetraenoyl-CoA to eicosapentaenoyl-CoA);R-HSA-2046092(Desaturation of dihomo-gamma-lenolenoyl-CoA to arachidonoyl-CoA)	1.35069	1.28447	1.15669	1.90159	1.8279	1.3685	1.28687	1.69123	2.00181	1.91946	1.15223	1.87676	1.98707	2.86045	0.561729	0.448356	0.366946	0.518911	0.526789	0.190844	0.513776	0.178255	0.230701	0.18546	0.392924	0.44106	0.478786	0.547104	4.23992	2.08404	4.61852e-32	8.75296e-30	up	yes
ENSG00000275111	ZNF2	7549,105379427	ENST00000614034;ENST00000617923;ENST00000611147;ENST00000622059;ENST00000611463	GO:0000978(RNA polymerase II cis-regulatory region sequence-specific DNA binding);GO:0000981(DNA-binding transcription factor activity, RNA polymerase II-specific);GO:0003677(DNA binding);GO:0005515(protein binding);GO:0005634(nucleus);GO:0006355(regulation of DNA-templated transcription);GO:0006357(regulation of transcription by RNA polymerase II);GO:0008270(zinc ion binding);GO:0046872(metal io…	05168(Herpes simplex virus 1 infection);05168(Herpes simplex virus 1 infection)	NA	NA	zf-C2H2	zinc finger protein 2 [Source:HGNC Symbol;Acc:HGNC:12991]	protein_coding	NA	R-HSA-975040(KRAB-ZNF / KAP Interaction)	0.336502	0.300372	0.602358	0.417391	0.457072	0.380222	0.472955	0.798888	0.790348	0.66977	1.19592	1.10948	1.21687	1.26691	0.169316	0.0485499	0.0365776	0.109931	0.134764	0.0372429	0.0454336	0	0.0427047	0.0459169	0.0269928	0.124976	0.080255	0.104919	9.93971	3.3132	5.18583e-32	9.78199e-30	up	yes
ENSG00000170633	RNF34	80196	ENST00000361234;ENST00000392464;ENST00000554484;ENST00000553407;ENST00000554606;ENST00000556562;ENST00000613529;ENST00000554868;ENST00000392465;ENST00000557402;ENST00000555076	GO:0002039(p53 binding);GO:0005515(protein binding);GO:0005634(nucleus);GO:0005654(nucleoplasm);GO:0005737(cytoplasm);GO:0005829(cytosol);GO:0005886(plasma membrane);GO:0006511(ubiquitin-dependent protein catabolic process);GO:0006915(apoptotic process);GO:0012505(endomembrane system);GO:0016020(membrane);GO:0016567(protein ubiquitination);GO:0016604(nuclear body);GO:0016607(nuclear speck);GO:001…	NA	K20804	EC:2.3.2.31	NA	ring finger protein 34 [Source:HGNC Symbol;Acc:HGNC:17297]	protein_coding;retained_intron	DOID:0050686(organ_system_cancer);DOID:14566(disease_of_cellular_proliferation);DOID:162(cancer);DOID:3119(gastrointestinal_system_cancer);DOID:4(disease);DOID:5041(esophageal_cancer)	R-HSA-6804441(RNF34 or RFFL ubiquitinates phosphorylated TP53);R-HSA-983140(Transfer of Ub from E2 to substrate and release of E2);R-HSA-983147(Release of E3 from polyubiquitinated substrate);R-HSA-983156(Polyubiquitination of substrate);R-HSA-983157(Interaction of E3 with substrate and E2-Ub complex)	3.78087	3.09747	4.61356	2.88665	5.12906	4.34088	4.53225	6.47333	6.46165	5.24384	8.7971	5.53977	9.02126	7.70021	2.86617	1.5097	2.64819	2.99201	3.4443	1.85626	2.59973	1.00627	1.68768	0.656008	2.16049	2.84318	2.2185	3.36117	2.43701	1.28511	5.47847e-32	1.02857e-29	up	yes
ENSG00000275832	ARHGAP23	57636	ENST00000622683;ENST00000616767;ENST00000614693;ENST00000620329;ENST00000618325;ENST00000619156;ENST00000618942;ENST00000616909;ENST00000617798;ENST00000620325	GO:0005096(GTPase activator activity);GO:0005515(protein binding);GO:0005829(cytosol);GO:0007165(signal transduction);GO:0050790(regulation of catalytic activity);GO:0051056(regulation of small GTPase mediated signal transduction);GO:0070062(extracellular exosome);GO:0070062(extracellular exosome)	NA	NA	NA	NA	Rho GTPase activating protein 23 [Source:HGNC Symbol;Acc:HGNC:29293]	protein_coding;processed_transcript;retained_intron;nonsense_mediated_decay	NA	R-HSA-8981637(RHOA GAPs stimulate RHOA GTPase activity);R-HSA-9013144(RAC1 GAPs stimulate RAC1 GTPase activity)	0.692408	0.95444	0.668902	0.839191	0.83712	0.735473	0.773242	0.736385	1.4709	2.0623	0.420045	1.67166	1.51701	1.60988	0.179472	0.173278	0.188467	0.215873	0.239161	0.0831125	0.117873	0.0464277	0.181508	0.0462565	0.303408	0.127493	0.157027	0.19344	6.65349	2.73411	5.68029e-32	1.0615e-29	up	yes
ENSG00000235016	SEMA3F-AS1	100129060	ENST00000437204	NA	NA	NA	NA	NA	SEMA3F antisense RNA 1 [Source:HGNC Symbol;Acc:HGNC:40518]	lncRNA	NA	NA	1.27431	0.85818	0.899779	0.65053	0.816985	3.01774	1.63598	2.31589	0.901929	0.634439	0.702628	0.816208	0.852216	0.817694	5.27591	3.77572	6.42887	6.40979	6.4112	4.24659	4.03963	3.76227	6.25871	2.47628	5.13069	7.61452	3.97684	6.48468	0.224016	-2.15833	7.0407e-32	1.30964e-29	down	yes
ENSG00000245571	FAM111A-DT	101927204	ENST00000532845;ENST00000658798;ENST00000531708;ENST00000501817;ENST00000533220	NA	NA	NA	NA	NA	FAM111A divergent transcript [Source:HGNC Symbol;Acc:HGNC:53752]	lncRNA	NA	NA	0.319719	0.239756	0.634805	0.533549	0.663182	0.634713	0.600278	0.916478	0.537147	0.522467	1.10066	0.950625	1.12975	1.09293	0.180789	0.135819	0.178519	0.237263	0.158123	0.0844226	0.169354	0.0795542	0.0398215	0.0370235	0.170376	0.203362	0.225502	0.255843	4.58122	2.19573	7.97239e-32	1.4761e-29	up	yes
ENSG00000142945	KIF2C	11004	ENST00000372224;ENST00000452259;ENST00000372217;ENST00000472235;ENST00000423289;ENST00000480574;ENST00000493027	GO:0000166(nucleotide binding);GO:0000775(chromosome, centromeric region);GO:0000776(kinetochore);GO:0003777(microtubule motor activity);GO:0005515(protein binding);GO:0005524(ATP binding);GO:0005634(nucleus);GO:0005694(chromosome);GO:0005737(cytoplasm);GO:0005813(centrosome);GO:0005819(spindle);GO:0005829(cytosol);GO:0005856(cytoskeleton);GO:0005871(kinesin complex);GO:0005874(microtubule);GO:00…	NA	NA	NA	NA	kinesin family member 2C [Source:HGNC Symbol;Acc:HGNC:6393]	protein_coding;processed_transcript	DOID:12336(male_infertility);DOID:14566(disease_of_cellular_proliferation);DOID:15(reproductive_system_disease);DOID:162(cancer);DOID:48(male_reproductive_system_disease);DOID:4(disease);DOID:5223(infertility);DOID:7(disease_of_anatomical_entity)	R-HSA-141409(Mad1 binds kinetochore);R-HSA-141422(MAD2 converted to an inhibitory state via interaction with Mad1);R-HSA-141431(MAD2 associates with the Mad1 kinetochore complex);R-HSA-141439(Release of activated MAD2 from kinetochores);R-HSA-1638803(Phosphorylation of cohesin by PLK1 at centromeres);R-HSA-1638821(PP2A-B56 dephosphorylates centromeric cohesin);R-HSA-2213248(Transport of antigen l…	1.19565	1.30922	1.15134	1.48145	1.65149	1.32302	1.01498	1.58544	2.95846	3.89076	0.924652	2.69241	3.64626	3.84578	0.287648	0.26139	0.390434	0.342711	0.382809	0.417842	0.215925	0.0506844	0.201888	0.0681409	0.162328	0.24565	0.317002	0.241454	7.99545	2.99918	1.03577e-31	1.90895e-29	up	yes
ENSG00000280067	ENSG00000280067		ENST00000623817	NA	NA	NA	NA	NA	novel transcript	TEC	NA	NA	0.324598	0.131218	0.37917	0.162335	0.262977	0.540281	0.526757	0.785006	0.351886	0.386266	0.383754	0.111657	0.561082	0.530666	1.36837	0.885414	1.41691	1.63453	1.70398	0.935882	1.22934	1.08644	0.791892	0.618633	1.54785	1.44961	0.865505	1.70838	0.315359	-1.66493	1.17716e-31	2.15963e-29	down	yes
ENSG00000167601	AXL	558	ENST00000301178;ENST00000359092;ENST00000599659;ENST00000593513	GO:0000166(nucleotide binding);GO:0001618(virus receptor activity);GO:0001764(neuron migration);GO:0001779(natural killer cell differentiation);GO:0001786(phosphatidylserine binding);GO:0001818(negative regulation of cytokine production);GO:0001961(positive regulation of cytokine-mediated signaling pathway);GO:0001974(blood vessel remodeling);GO:0002376(immune system process);GO:0004672(protein k…	01521(EGFR tyrosine kinase inhibitor resistance);01521(EGFR tyrosine kinase inhibitor resistance)	K05115	EC:2.7.10.1	NA	AXL receptor tyrosine kinase [Source:HGNC Symbol;Acc:HGNC:905]	protein_coding;retained_intron	DOID:0050615(respiratory_system_cancer);DOID:0050686(organ_system_cancer);DOID:0050687(cell_type_cancer);DOID:0060116(sensory_system_cancer);DOID:0060122(integumentary_system_cancer);DOID:1074(kidney_failure);DOID:1115(sarcoma);DOID:12556(acute_kidney_tubular_necrosis);DOID:1287(cardiovascular_system_disease);DOID:1289(neurodegenerative_disease);DOID:1324(lung_cancer);DOID:14566(disease_of_cellul…	R-HSA-5218819(VEGFA dimer:p-6Y-VEGFR2 dimer:PI3K phosphorylates PIP2 to PIP3);R-HSA-5357429(AXL autophosphorylates on Y772 and Y814);R-HSA-5357432(AXL binds SRC-1);R-HSA-5357479(p-AXL binds PI3K)	3.14097	3.00315	2.5418	3.32393	3.2431	3.12119	2.47965	2.95964	4.85027	6.17687	2.77699	5.62075	6.03976	5.75184	0.431804	0.435811	0.560515	0.378005	0.663191	0.306571	0.378507	0.0277774	0.320277	0.351047	0.403209	0.264498	0.0967169	0.466878	10.8224	3.43595	1.23836e-31	2.26159e-29	up	yes
ENSG00000101247	NDUFAF5	79133	ENST00000476536;ENST00000486772;ENST00000479682;ENST00000476124;ENST00000463598;ENST00000487478;ENST00000469177;ENST00000378081;ENST00000475968;ENST00000476200;ENST00000464269;ENST00000378106;ENST00000485738;ENST00000481249;ENST00000479716	GO:0003674(molecular_function);GO:0005515(protein binding);GO:0005739(mitochondrion);GO:0005743(mitochondrial inner membrane);GO:0008168(methyltransferase activity);GO:0016020(membrane);GO:0016491(oxidoreductase activity);GO:0016740(transferase activity);GO:0030961(peptidyl-arginine hydroxylation);GO:0031314(extrinsic component of mitochondrial inner membrane);GO:0032259(methylation);GO:0032981(m…	04714(Thermogenesis);04714(Thermogenesis)	NA	NA	NA	NADH:ubiquinone oxidoreductase complex assembly factor 5 [Source:HGNC Symbol;Acc:HGNC:15899]	processed_transcript;protein_coding;nonsense_mediated_decay	DOID:0014667(disease_of_metabolism);DOID:225(syndrome);DOID:4(disease);DOID:655(inherited_metabolic_disorder);DOID:700(mitochondrial_metabolism_disease)	R-HSA-6799179(Peripheral arm subunits bind the 815kDa complex to form a 980kDa complex);R-HSA-6799191(Intermediate 2 binds MT-ND1:NDUFAF5:NDUFAF6 to form a 315kDa subcomplex);R-HSA-6799196(The MCIA complex, NDUFAF2-7 all dissociate from the 980kDa complex, resulting in Complex I);R-HSA-6799197(ND4, ND5 bind the 550kDa complex to form the 815kDa complex);R-HSA-6799202(The 315kDa subcomplex binds t…	0.212327	0.191499	0.299125	0.175284	0.296476	0.330777	0.352283	0.550761	0.384677	0.37048	0.302759	0.358194	0.645509	0.443716	1.44447	0.547499	0.887044	1.13926	0.866168	0.646344	0.914202	0.358734	1.08612	0.235091	0.707387	0.896925	0.54998	1.51287	0.416709	-1.26289	1.4036e-31	2.55175e-29	down	yes
ENSG00000233237	LINC00472	79940	ENST00000651660;ENST00000625013;ENST00000652370;ENST00000651778;ENST00000426635;ENST00000421704;ENST00000650942	GO:0035195(miRNA-mediated gene silencing);GO:0035195(miRNA-mediated gene silencing)	NA	NA	NA	NA	long intergenic non-protein coding RNA 472 [Source:HGNC Symbol;Acc:HGNC:21380]	lncRNA	NA	NA	0.0437306	0.0753183	0.0417779	0.0477891	0.0769775	0.0398768	0.0575241	0.0701656	0.0652768	0.0892704	0.0114757	0.0758582	0.0943522	0.0677656	0.00581277	0.00222021	0	0	0	0.00308358	0	0	0	0	0	0.00345381	0	0.00179433	52.3785	5.7109	1.47541e-31	2.67023e-29	up	yes
ENSG00000257337	TNS2-AS1		ENST00000668380;ENST00000701213;ENST00000546793;ENST00000660006;ENST00000662887;ENST00000552905;ENST00000663863;ENST00000607643;ENST00000669379;ENST00000551890;ENST00000686638;ENST00000549388;ENST00000657729;ENST00000685842;ENST00000688419	NA	NA	NA	NA	NA	TNS2 antisense RNA 1 [Source:HGNC Symbol;Acc:HGNC:27464]	lncRNA	NA	NA	0.0606617	0.0603984	0.0468619	0.0552346	0.067451	0.173866	0.111317	0.140736	0.107627	0.0894286	0.0284777	0.105027	0.074209	0.0477762	0.584121	0.358824	0.626577	0.711288	0.603736	0.443573	0.186699	0.253869	0.154222	0.105454	0.406637	0.627777	0.340585	0.706947	0.191328	-2.38588	1.50914e-31	2.71903e-29	down	yes
ENSG00000141510	TP53	7157	ENST00000620739;ENST00000505014;ENST00000635293;ENST00000269305;ENST00000510385;ENST00000618944;ENST00000610292;ENST00000622645;ENST00000420246;ENST00000359597;ENST00000610538;ENST00000445888;ENST00000619485;ENST00000455263;ENST00000508793;ENST00000504937;ENST00000610623;ENST00000504290;ENST00000576024;ENST00000619186;ENST00000574684;ENST00000571370	GO:0000122(negative regulation of transcription by RNA polymerase II);GO:0000423(mitophagy);GO:0000785(chromatin);GO:0000976(transcription cis-regulatory region binding);GO:0000977(RNA polymerase II transcription regulatory region sequence-specific DNA binding);GO:0000978(RNA polymerase II cis-regulatory region sequence-specific DNA binding);GO:0000981(DNA-binding transcription factor activity, R…	01522(Endocrine resistance);01524(Platinum drug resistance);04010(MAPK signaling pathway);04071(Sphingolipid signaling pathway);04110(Cell cycle);04115(p53 signaling pathway);04137(Mitophagy - animal);04151(PI3K-Akt signaling pathway);04210(Apoptosis);04211(Longevity regulating pathway);04216(Ferroptosis);04218(Cellular senescence);04310(Wnt signaling pathway);04722(Neurotrophin signaling pathway…	NA	NA	P53	tumor protein p53 [Source:HGNC Symbol;Acc:HGNC:11998]	protein_coding;retained_intron;nonsense_mediated_decay;processed_transcript	DOID:0002116(pterygium);DOID:0014667(disease_of_metabolism);DOID:0050013(carbohydrate_metabolism_disease);DOID:0050117(disease_by_infectious_agent);DOID:0050155(sensory_system_disease);DOID:0050161(lower_respiratory_tract_disease);DOID:0050177(monogenic_disease);DOID:0050338(primary_bacterial_infectious_disease);DOID:0050615(respiratory_system_cancer);DOID:0050622(reproductive_organ_benign_neopla…	R-HSA-139913(TP53 stimulates BBC3 (PUMA) expression);R-HSA-140214(TP53 stimulates PMAIP1 (NOXA) expression);R-HSA-1912406(p53 positively regulates transcription of MIR34 microRNAs);R-HSA-264435(Dissociation of the COP1-p53 complex);R-HSA-2997706(MDM2 SUMOylates TP53 with SUMO2,3);R-HSA-3215144(TP53 in complex with EP300, PRMT1 and CARM1 stimulates GADD45A transcription);R-HSA-3215152(TP53 in comp…	2.52168	3.17877	5.22999	3.36571	5.5154	4.38312	4.02361	4.64615	7.46708	7.6775	9.12053	6.70329	8.61882	8.37444	2.68029	1.55586	1.57413	2.72759	2.38717	1.02913	1.9793	0.935754	1.53698	0.61722	1.69502	1.9961	1.73384	2.41856	3.25034	1.70059	2.03339e-31	3.64722e-29	up	yes
ENSG00000109814	UGDH	7358	ENST00000515021;ENST00000316423;ENST00000506179;ENST00000501493;ENST00000507089;ENST00000503779;ENST00000515398;ENST00000514106	GO:0001702(gastrulation with mouth forming second);GO:0003824(catalytic activity);GO:0003979(UDP-glucose 6-dehydrogenase activity);GO:0005634(nucleus);GO:0005654(nucleoplasm);GO:0005829(cytosol);GO:0005975(carbohydrate metabolic process);GO:0006024(glycosaminoglycan biosynthetic process);GO:0006065(UDP-glucuronate biosynthetic process);GO:0008152(metabolic process);GO:0015012(heparan sulfate prot…	00040(Pentose and glucuronate interconversions);00053(Ascorbate and aldarate metabolism);00520(Amino sugar and nucleotide sugar metabolism);01100(Metabolic pathways);01240(Biosynthesis of cofactors);01240(Biosynthesis of cofactors)	K00012	EC:1.1.1.22	NA	UDP-glucose 6-dehydrogenase [Source:HGNC Symbol;Acc:HGNC:12525]	protein_coding;nonsense_mediated_decay;processed_transcript	NA	R-HSA-173597(UDP-glucose is oxidised to UDP-glucuronate)	0.683879	0.921882	1.09316	0.661242	1.27407	1.22225	1.21051	1.83019	2.012	2.26752	1.92156	1.3773	2.37524	2.11452	0.245022	0.278702	0.205214	0.320861	0.365574	0.137224	0.181521	0.0288858	0.155472	0	0.215018	0.430375	0.30087	0.408	6.40605	2.67944	2.2391e-31	3.99834e-29	up	yes
ENSG00000197713	RPE	6120	ENST00000359429;ENST00000436630;ENST00000429921;ENST00000354506;ENST00000454822;ENST00000429907;ENST00000453724;ENST00000438204;ENST00000441588;ENST00000452025;ENST00000408981;ENST00000411934;ENST00000445268;ENST00000435437	GO:0004750(D-ribulose-phosphate 3-epimerase activity);GO:0005515(protein binding);GO:0005829(cytosol);GO:0005975(carbohydrate metabolic process);GO:0006098(pentose-phosphate shunt);GO:0009052(pentose-phosphate shunt, non-oxidative branch);GO:0016853(isomerase activity);GO:0016857(racemase and epimerase activity, acting on carbohydrates and derivatives);GO:0042802(identical protein binding);GO:004…	00030(Pentose phosphate pathway);00040(Pentose and glucuronate interconversions);01100(Metabolic pathways);01200(Carbon metabolism);01230(Biosynthesis of amino acids);01230(Biosynthesis of amino acids)	K01783	EC:5.1.3.1	NA	ribulose-5-phosphate-3-epimerase [Source:HGNC Symbol;Acc:HGNC:10293]	protein_coding	NA	R-HSA-199803(xylulose 5-phosphate <=> D-ribulose 5-phosphate);R-HSA-71303(RPE dimers isomerise RU5P to XY5P)	1.64485	1.52067	2.93426	2.34536	2.21518	2.97438	2.56586	3.62479	4.53267	2.90785	2.68864	3.07839	4.57266	5.17419	1.07066	0.426239	1.36643	1.3204	1.28288	0.457264	1.07391	0.269582	0.3473	0.222788	0.854368	0.964665	1.10375	1.24641	3.56301	1.8331	2.24979e-31	3.99964e-29	up	yes
ENSG00000107789	MINPP1	9562	ENST00000371996;ENST00000472891;ENST00000536010;ENST00000371994	GO:0001503(ossification);GO:0003993(acid phosphatase activity);GO:0004446(inositol-hexakisphosphate phosphatase activity);GO:0005515(protein binding);GO:0005783(endoplasmic reticulum);GO:0005788(endoplasmic reticulum lumen);GO:0006797(polyphosphate metabolic process);GO:0016787(hydrolase activity);GO:0016791(phosphatase activity);GO:0030282(bone mineralization);GO:0030351(inositol-1,3,4,5,6-penta…	00010(Glycolysis / Gluconeogenesis);00562(Inositol phosphate metabolism);01100(Metabolic pathways);01100(Metabolic pathways)	K03103	EC:3.1.3.62;EC:3.1.3.80	NA	multiple inositol-polyphosphate phosphatase 1 [Source:HGNC Symbol;Acc:HGNC:7102]	protein_coding;processed_transcript	NA	R-HSA-1855163(I(1,3,4,5,6)P5 is dephosphorylated to I(1,4,5,6)P4 by MINPP1 in the ER lumen);R-HSA-1855200(I(1,3,4,5)P4 is dephosphorylated to I(1,4,5)P3 by MINPP1 in the ER lumen);R-HSA-1855225(IP6 is dephosphorylated to I(1,2,4,5,6)P5 by MINPP1 in the ER lumen)	1.37897	1.21579	1.42454	1.25941	2.04618	1.87465	1.47058	2.02969	2.37007	2.29209	2.63516	2.54256	3.5168	3.32875	0.631643	0.21668	0.617374	0.624055	0.583679	0.355446	0.740105	0.0777948	0.354909	0.141551	0.326785	0.376338	0.776905	0.708504	4.49882	2.16955	2.26118e-31	4.00219e-29	up	yes
ENSG00000179933	C14orf119	55017	ENST00000319074;ENST00000554203	GO:0005515(protein binding);GO:0005739(mitochondrion);GO:0005829(cytosol);GO:0005829(cytosol)	NA	NA	NA	NA	chromosome 14 open reading frame 119 [Source:HGNC Symbol;Acc:HGNC:20270]	protein_coding	NA	NA	4.70505	2.89469	4.96906	4.2895	6.4678	5.16257	5.39265	7.222	7.42456	6.64932	11.2897	7.67101	10.9227	9.76408	3.11555	0.773846	1.82911	2.72456	2.5459	1.03812	2.41192	1.29069	2.28116	0.49896	1.86246	2.29795	2.10549	2.9196	3.42385	1.77562	2.33915e-31	4.12204e-29	up	yes
ENSG00000197183	NOL4L	140688	ENST00000475781;ENST00000359676;ENST00000375677;ENST00000621426;ENST00000326071;ENST00000201961;ENST00000375678;ENST00000485364;ENST00000419612	GO:0005515(protein binding);GO:0005654(nucleoplasm);GO:0005829(cytosol);GO:0005829(cytosol)	NA	NA	NA	NA	nucleolar protein 4 like [Source:HGNC Symbol;Acc:HGNC:16106]	nonsense_mediated_decay;protein_coding;processed_transcript	NA	NA	3.3107	2.4634	3.6096	1.92697	3.00727	5.31212	3.86944	5.40952	4.25421	3.81105	5.38103	4.03596	4.23389	4.08093	8.53947	6.52667	9.16233	10.0809	8.9127	4.5669	5.71405	3.71329	4.2617	1.60204	8.37195	9.44592	6.822	10.215	0.558596	-0.840122	3.23433e-31	5.67463e-29	down	no
ENSG00000235314	LINC00957	255031	ENST00000441052;ENST00000416824	NA	NA	NA	NA	NA	long intergenic non-protein coding RNA 957 [Source:HGNC Symbol;Acc:HGNC:22332]	lncRNA	NA	NA	1.86913	0.904074	1.44539	1.12687	2.47776	2.04417	1.85304	3.07225	2.11518	2.22562	3.5706	2.37737	3.34061	2.61799	0.721297	0.606124	0.842727	0.679408	0.65063	0.278805	0.76463	0.61769	0.371526	0.232764	0.632906	0.789629	0.705962	0.915804	3.52331	1.81693	3.45457e-31	6.03468e-29	up	yes
ENSG00000116604	MEF2D	4209	ENST00000348159;ENST00000475587;ENST00000493077;ENST00000489057;ENST00000464356;ENST00000360595	GO:0000785(chromatin);GO:0000977(RNA polymerase II transcription regulatory region sequence-specific DNA binding);GO:0000978(RNA polymerase II cis-regulatory region sequence-specific DNA binding);GO:0000981(DNA-binding transcription factor activity, RNA polymerase II-specific);GO:0001228(DNA-binding transcription activator activity, RNA polymerase II-specific);GO:0001649(osteoblast differentiatio…	04022(cGMP-PKG signaling pathway);04371(Apelin signaling pathway);04928(Parathyroid hormone synthesis, secretion and action);04928(Parathyroid hormone synthesis, secretion and action)	NA	NA	SRF	myocyte enhancer factor 2D [Source:HGNC Symbol;Acc:HGNC:6997]	protein_coding;nonsense_mediated_decay;retained_intron	DOID:0050687(cell_type_cancer);DOID:1289(neurodegenerative_disease);DOID:14330(Parkinson's_disease);DOID:14566(disease_of_cellular_proliferation);DOID:162(cancer);DOID:2994(germ_cell_cancer);DOID:331(central_nervous_system_disease);DOID:4766(embryoma);DOID:4(disease);DOID:688(embryonal_cancer);DOID:7(disease_of_anatomical_entity);DOID:863(nervous_system_disease)	R-HSA-1368140(Expression of PPARGC1A (PGC-1alpha));R-HSA-448955(Phosphorylation of MEF2 proteins by p38);R-HSA-448963(Interaction of MyoD:E protein with MEF2);R-HSA-9031610(p-S133 CREB1, MEF2D and SRF bind the ARC gene);R-HSA-9031624(ARC gene expression)	9.9305	6.10338	9.37343	6.73717	10.3996	15.2046	13.1143	15.8248	11.4777	13.9499	20.052	11.7459	14.2513	14.4467	21.7989	17.4987	26.0549	29.8267	25.2351	13.2404	16.8281	16.5821	18.8196	7.52219	27.8772	30.2542	18.033	26.6054	0.582799	-0.778931	3.59267e-31	6.24876e-29	down	no
ENSG00000261326	LINC01355	100996511	ENST00000566551;ENST00000655082;ENST00000660265;ENST00000666981	NA	NA	NA	NA	NA	long intergenic non-protein coding RNA 1355 [Source:HGNC Symbol;Acc:HGNC:50584]	lncRNA	NA	NA	0.576278	0.224137	0.544198	0.370923	0.526973	0.395193	0.457215	0.70414	0.670126	0.649473	0.535247	0.541515	0.461043	0.570975	0.111871	0.0571453	0.050809	0.0951869	0.101994	0.019784	0.0570202	0.0470014	0.00402268	0.0087842	0.00939711	0.0738162	0.10636	0.120579	8.36731	3.06476	3.7302e-31	6.46e-29	up	yes
ENSG00000137806	NDUFAF1	51103	ENST00000676533;ENST00000679240;ENST00000560978;ENST00000260361;ENST00000559127;ENST00000679094;ENST00000558719;ENST00000677477;ENST00000678029	GO:0005515(protein binding);GO:0005739(mitochondrion);GO:0005743(mitochondrial inner membrane);GO:0005747(mitochondrial respiratory chain complex I);GO:0005759(mitochondrial matrix);GO:0005829(cytosol);GO:0006120(mitochondrial electron transport, NADH to ubiquinone);GO:0010257(NADH dehydrogenase complex assembly);GO:0032981(mitochondrial respiratory chain complex I assembly);GO:0051082(unfolded p…	04714(Thermogenesis);04714(Thermogenesis)	NA	NA	NA	NADH:ubiquinone oxidoreductase complex assembly factor 1 [Source:HGNC Symbol;Acc:HGNC:18828]	protein_coding;retained_intron;nonsense_mediated_decay;processed_transcript	DOID:0014667(disease_of_metabolism);DOID:4(disease);DOID:655(inherited_metabolic_disorder);DOID:700(mitochondrial_metabolism_disease)	R-HSA-6799179(Peripheral arm subunits bind the 815kDa complex to form a 980kDa complex);R-HSA-6799196(The MCIA complex, NDUFAF2-7 all dissociate from the 980kDa complex, resulting in Complex I);R-HSA-6799197(ND4, ND5 bind the 550kDa complex to form the 815kDa complex);R-HSA-6799199(COA1:MT-ND2, TMEM186:MT-ND3, MT-ND6, NDUFB6 bind the MCIA complex to form a 370kDa subcomplex);R-HSA-6799202(The 315…	0.661262	0.68784	1.28535	0.755297	1.11817	1.16778	1.01735	1.66449	1.54573	1.60667	2.03134	1.19114	2.38445	2.48973	0.273202	0.19994	0.517665	0.169565	0.310222	0.195718	0.0900792	0.0868492	0.179661	0.0424221	0.403892	0.436985	0.377285	0.473405	5.21884	2.38373	4.76062e-31	8.20911e-29	up	yes
ENSG00000112039	FANCE	2178	ENST00000229769;ENST00000696269;ENST00000696268;ENST00000696266;ENST00000696267;ENST00000648059;ENST00000696264;ENST00000696265	GO:0000785(chromatin);GO:0003674(molecular_function);GO:0005634(nucleus);GO:0005654(nucleoplasm);GO:0006281(DNA repair);GO:0006513(protein monoubiquitination);GO:0006974(cellular response to DNA damage stimulus);GO:0036297(interstrand cross-link repair);GO:0043240(Fanconi anaemia nuclear complex);GO:0043240(Fanconi anaemia nuclear complex)	03460(Fanconi anemia pathway);03460(Fanconi anemia pathway)	NA	NA	NA	FA complementation group E [Source:HGNC Symbol;Acc:HGNC:3586]	protein_coding;retained_intron;nonsense_mediated_decay	DOID:2355(anemia);DOID:2914(immune_system_disease);DOID:4(disease);DOID:74(hematopoietic_system_disease);DOID:7(disease_of_anatomical_entity)	R-HSA-6785126(FA core complex assembles at DNA interstrand crosslinks (ICLs));R-HSA-6785342(FANCD2:FANCI complex and UBE2T bind ICL-DNA associated with the FA core complex);R-HSA-6785361(Monoubiquitination of FANCD2:FANCI);R-HSA-6785732(DNA nucleases bind monoubiquitinated ID2 complex);R-HSA-6785986(DNA nucleases unhook the interstrand crosslink (ICL));R-HSA-6786155(POLN binds ICL-DNA);R-HSA-6786…	0.645421	0.622937	0.934034	0.557675	0.591917	1.42162	0.949991	0.975598	1.09773	1.31755	0.865271	1.15658	1.27434	1.04274	0.296244	0.34598	0.276346	0.38478	0.354727	0.220316	0.157733	0.110814	0.167237	0.0435259	0.248656	0.377775	0.316089	0.332336	3.70356	1.88891	5.90856e-31	1.01451e-28	up	yes
ENSG00000184990	SIVA1	10572	ENST00000556431;ENST00000556195;ENST00000329967;ENST00000553819;ENST00000347067;ENST00000535554;ENST00000554013	GO:0001618(virus receptor activity);GO:0005164(tumor necrosis factor receptor binding);GO:0005175(CD27 receptor binding);GO:0005515(protein binding);GO:0005634(nucleus);GO:0005654(nucleoplasm);GO:0005737(cytoplasm);GO:0005739(mitochondrion);GO:0006915(apoptotic process);GO:0006924(activation-induced cell death of T cells);GO:0008270(zinc ion binding);GO:0032088(negative regulation of NF-kappaB tr…	04115(p53 signaling pathway);04115(p53 signaling pathway)	NA	NA	NA	SIVA1 apoptosis inducing factor [Source:HGNC Symbol;Acc:HGNC:17712]	retained_intron;protein_coding;nonsense_mediated_decay	DOID:0050117(disease_by_infectious_agent);DOID:0050338(primary_bacterial_infectious_disease);DOID:0050687(cell_type_cancer);DOID:104(bacterial_infectious_disease);DOID:11077(brucellosis);DOID:14566(disease_of_cellular_proliferation);DOID:162(cancer);DOID:2994(germ_cell_cancer);DOID:4766(embryoma);DOID:4(disease);DOID:688(embryonal_cancer);DOID:8469(influenza);DOID:934(viral_infectious_disease)	NA	2.41645	2.373	3.11982	2.45356	3.34165	4.95798	4.76865	5.62872	3.90037	4.53267	2.96553	3.98403	4.59915	3.7792	7.39192	8.13058	8.91155	11.6219	9.328	6.80996	6.76709	7.85213	7.54404	2.97459	7.85931	8.48694	6.01109	10.2669	0.480381	-1.05775	6.29788e-31	1.07675e-28	down	yes
ENSG00000039560	RAI14	26064	ENST00000512629;ENST00000428746;ENST00000265109;ENST00000514931;ENST00000513772;ENST00000507883;ENST00000505185;ENST00000511652;ENST00000502736;ENST00000510319;ENST00000515448;ENST00000514527;ENST00000503222;ENST00000508315;ENST00000509247	GO:0001650(fibrillar center);GO:0003779(actin binding);GO:0005515(protein binding);GO:0005634(nucleus);GO:0005654(nucleoplasm);GO:0005737(cytoplasm);GO:0005829(cytosol);GO:0005856(cytoskeleton);GO:0005938(cell cortex);GO:0007283(spermatogenesis);GO:0030054(cell junction);GO:0030154(cell differentiation);GO:0097190(apoptotic signaling pathway);GO:1901222(regulation of NIK/NF-kappaB signaling);GO:1…	NA	NA	NA	NA	retinoic acid induced 14 [Source:HGNC Symbol;Acc:HGNC:14873]	protein_coding;retained_intron;processed_transcript;nonsense_mediated_decay	NA	NA	1.27639	1.30569	0.922847	1.35642	1.15836	1.0903	1.3899	1.14241	1.41465	1.64393	0.014564	1.48064	1.2797	1.63601	0.114666	0.114556	0.107205	0.142638	0.104983	0.0608989	0.0710535	0.0227823	0.0345977	0.0399783	0.0401479	0.0469153	0.0669342	0.100734	16.021	4.00189	7.1659e-31	1.21996e-28	up	yes
ENSG00000224470	ATXN1L	342371	ENST00000427980;ENST00000569119;ENST00000565676;ENST00000683775	GO:0000122(negative regulation of transcription by RNA polymerase II);GO:0003677(DNA binding);GO:0003723(RNA binding);GO:0005515(protein binding);GO:0005634(nucleus);GO:0005654(nucleoplasm);GO:0005730(nucleolus);GO:0006355(regulation of DNA-templated transcription);GO:0006366(transcription by RNA polymerase II);GO:0007420(brain development);GO:0007612(learning);GO:0007613(memory);GO:0030198(extra…	04330(Notch signaling pathway);05017(Spinocerebellar ataxia);05022(Pathways of neurodegeneration - multiple diseases);05022(Pathways of neurodegeneration - multiple diseases)	NA	NA	NA	ataxin 1 like [Source:HGNC Symbol;Acc:HGNC:33279]	protein_coding;processed_transcript;retained_intron	NA	NA	3.19813	2.29002	3.36529	2.31442	3.65338	5.82277	5.00566	6.224	4.71111	4.50763	5.4016	4.25741	5.71131	5.69818	11.42	7.42457	12.0039	12.8294	11.7	5.64791	9.56037	5.02964	4.43278	1.22846	11.1703	13.0783	8.12779	12.4561	0.492912	-1.0206	7.88067e-31	1.33599e-28	down	yes
ENSG00000177733	HNRNPA0	10949	ENST00000314940	GO:0003676(nucleic acid binding);GO:0003723(RNA binding);GO:0003729(mRNA binding);GO:0005634(nucleus);GO:0005654(nucleoplasm);GO:0006397(mRNA processing);GO:0006954(inflammatory response);GO:0019901(protein kinase binding);GO:0032496(response to lipopolysaccharide);GO:0035925(mRNA 3'-UTR AU-rich region binding);GO:0070935(3'-UTR-mediated mRNA stabilization)	NA	NA	NA	NA	heterogeneous nuclear ribonucleoprotein A0 [Source:HGNC Symbol;Acc:HGNC:5030]	protein_coding	DOID:150(disease_of_mental_health);DOID:1561(cognitive_disorder);DOID:2468(psychotic_disorder);DOID:4(disease);DOID:5419(schizophrenia)	R-HSA-156661(Formation of Exon Junction Complex);R-HSA-72103(Formation of pre-mRNPs);R-HSA-72107(Formation of the Spliceosomal E complex);R-HSA-72124(Formation of the Spliceosomal A Complex);R-HSA-72127(Formation of the Spliceosomal B Complex);R-HSA-72130(Formation of an intermediate Spliceosomal C complex);R-HSA-72139(Formation of the active Spliceosomal C complex);R-HSA-72143(Lariat Formation a…	5.88099	4.53373	7.08873	6.09856	8.01043	11.8594	12.447	13.4942	10.4938	10.0699	12.423	10.9555	14.1281	12.89	15.323	11.2611	16.1167	18.7882	19.7273	10.4387	14.1806	10.7018	13.7773	4.78739	15.4559	15.7302	12.4769	18.9967	0.70981	-0.494495	8.31707e-31	1.40405e-28	down	no
ENSG00000164087	POC1A	25886	ENST00000296484;ENST00000394970;ENST00000474012	GO:0000922(spindle pole);GO:0005515(protein binding);GO:0005737(cytoplasm);GO:0005813(centrosome);GO:0005814(centriole);GO:0005815(microtubule organizing center);GO:0005856(cytoskeleton);GO:0030030(cell projection organization);GO:0036064(ciliary basal body);GO:0042995(cell projection);GO:0060271(cilium assembly);GO:0060271(cilium assembly)	NA	NA	NA	NA	POC1 centriolar protein A [Source:HGNC Symbol;Acc:HGNC:24488]	protein_coding	NA	NA	1.19512	0.87487	1.06495	1.05336	1.17974	1.29598	1.11464	1.63742	2.19887	3.14042	0.885038	1.5108	1.51599	2.30144	0.504625	0.225748	0.376269	0.405611	0.437321	0.310411	0.20774	0.242051	0.170109	0.0971932	0.307323	0.339351	0.287766	0.491382	4.76246	2.25171	1.24528e-30	2.09343e-28	up	yes
ENSG00000058600	POLR3E	55718	ENST00000565117;ENST00000563766;ENST00000564061;ENST00000359210;ENST00000565358;ENST00000569787;ENST00000299853;ENST00000561494;ENST00000564256;ENST00000564750;ENST00000615879;ENST00000565551;ENST00000567022;ENST00000564883;ENST00000569757;ENST00000563024;ENST00000563282	GO:0000428(DNA-directed RNA polymerase complex);GO:0002376(immune system process);GO:0005634(nucleus);GO:0005654(nucleoplasm);GO:0005666(RNA polymerase III complex);GO:0005829(cytosol);GO:0006351(DNA-templated transcription);GO:0045087(innate immune response);GO:0051607(defense response to virus);GO:0051607(defense response to virus)	03020(RNA polymerase);04623(Cytosolic DNA-sensing pathway);04623(Cytosolic DNA-sensing pathway)	NA	NA	NA	RNA polymerase III subunit E [Source:HGNC Symbol;Acc:HGNC:30347]	retained_intron;protein_coding;nonsense_mediated_decay;processed_transcript	NA	R-HSA-112054(RNA Polymerase III Abortive Initiation At Type 3 Open Promoters);R-HSA-112055(RNA Polymerase III Abortive Initiation At Type 1 Open Promoters);R-HSA-112149(RNA Polymerase III Abortive Initiation At Type 2 Open Promoters);R-HSA-112150(RNA Polymerase III Promoter Opening at Type 2 Promoters);R-HSA-112152(RNA Polymerase III Promoter Opening at Type 3 Promoters);R-HSA-112153(RNA Polymera…	0.987591	0.867133	1.62978	1.00803	1.48982	1.84876	2.00954	2.53789	2.39126	2.23485	2.39578	2.47286	2.45701	2.82663	6.51302	3.69817	3.90338	5.1536	5.75293	2.27816	4.30787	1.79071	2.75917	0.963388	2.55896	4.31459	3.34283	5.01089	0.51878	-0.946805	1.37556e-30	2.3028e-28	down	no
ENSG00000163159	VPS72	6944	ENST00000354473;ENST00000368892;ENST00000496809;ENST00000471423	GO:0000122(negative regulation of transcription by RNA polymerase II);GO:0000786(nucleosome);GO:0003677(DNA binding);GO:0005515(protein binding);GO:0005634(nucleus);GO:0005654(nucleoplasm);GO:0006325(chromatin organization);GO:0006338(chromatin remodeling);GO:0006355(regulation of DNA-templated transcription);GO:0016573(histone acetylation);GO:0016607(nuclear speck);GO:0032991(protein-containing …	NA	NA	NA	NA	vacuolar protein sorting 72 homolog [Source:HGNC Symbol;Acc:HGNC:11644]	protein_coding;processed_transcript;retained_intron	NA	R-HSA-3321975(NuA4 complex acetylates histone H2A, HIST1H4)	5.73365	4.00411	5.68885	4.47003	8.09876	7.92437	8.01701	8.91978	11.2263	10.3393	13.4801	10.1496	15.4599	10.5077	4.67839	2.35369	3.9932	5.10677	4.16112	2.55254	3.26349	1.70163	2.90706	1.23188	3.66062	3.67312	3.39742	4.79929	2.61202	1.38517	1.9592e-30	3.26037e-28	up	yes
ENSG00000143476	DTL	51514,10673	ENST00000366991;ENST00000489149;ENST00000463791;ENST00000542077	GO:0000209(protein polyubiquitination);GO:0004842(ubiquitin-protein transferase activity);GO:0005515(protein binding);GO:0005634(nucleus);GO:0005654(nucleoplasm);GO:0005694(chromosome);GO:0005730(nucleolus);GO:0005737(cytoplasm);GO:0005813(centrosome);GO:0005815(microtubule organizing center);GO:0005829(cytosol);GO:0005856(cytoskeleton);GO:0006260(DNA replication);GO:0006511(ubiquitin-dependent p…	NA	NA	NA	NA	denticleless E3 ubiquitin protein ligase homolog [Source:HGNC Symbol;Acc:HGNC:30288]	protein_coding;processed_transcript	DOID:14566(disease_of_cellular_proliferation);DOID:162(cancer);DOID:4(disease)	R-HSA-5652005(RAD18:UBE2B or RBX1:CUL4:DDB1:DTL ubiquitin ligase complex binds PCNA:POLD,POLE:RPA:RFC associated with damaged dsDNA);R-HSA-5652009(RAD18:UBE2B or RBX1:CUL4:DDB1:DTL monoubiquitinates PCNA);R-HSA-8952638(AcM-UBE2M transfers NEDD8 to CRL4 E3 ubiquitin ligase complex);R-HSA-8952639(NEDD8:AcM-UBE2M binds CRL4 E3 ubiquitin ligase complex);R-HSA-8955245(CAND1 binds CRL4 E3 ubiquitin lig…	0.763345	0.399028	0.385969	0.648734	0.890462	0.675911	0.642809	0.974567	1.69865	1.84193	1.46588	1.0402	1.47781	2.52613	0.123956	0.124496	0.229393	0.228253	0.238336	0.133739	0.1515	0.0233349	0.0762446	0.042137	0.105167	0.0918516	0.290892	0.140296	7.71727	2.94809	1.96378e-30	3.26037e-28	up	yes
ENSG00000225648	SBDSP1	155370	ENST00000702913;ENST00000456312;ENST00000415772;ENST00000685034;ENST00000423945;ENST00000453858;ENST00000437201;ENST00000691023	NA	NA	NA	NA	NA	SBDS pseudogene 1 [Source:HGNC Symbol;Acc:HGNC:21646]	processed_transcript;transcribed_unprocessed_pseudogene	NA	NA	1.58297	1.4023	2.31216	2.21972	3.23356	6.08908	3.34554	5.93911	3.48064	3.00566	2.60657	3.53379	5.28386	4.48614	10.376	7.09481	10.6302	10.7249	11.3837	7.46085	8.00179	3.66712	7.31159	2.1459	6.5846	10.8828	4.53188	13.9922	0.422701	-1.24229	2.06963e-30	3.41346e-28	down	yes
ENSG00000169594	BNC1	646,40	ENST00000345382;ENST00000569704	GO:0000182(rDNA binding);GO:0001216(DNA-binding transcription activator activity);GO:0003677(DNA binding);GO:0005634(nucleus);GO:0005654(nucleoplasm);GO:0005730(nucleolus);GO:0005737(cytoplasm);GO:0006355(regulation of DNA-templated transcription);GO:0006356(regulation of transcription by RNA polymerase I);GO:0007283(spermatogenesis);GO:0008284(positive regulation of cell population proliferation…	NA	NA	NA	zf-C2H2	basonuclin 1 [Source:HGNC Symbol;Acc:HGNC:1081]	protein_coding	NA	NA	0.431704	0.385578	0.30199	0.488027	0.479276	0.418255	0.372267	0.264768	0.434517	0.644533	0	0.638778	0.70119	0.647245	0.0121528	0	0.0122656	0.00688988	0	0	0	0	0	0	0	0	0	0	198.29	7.63147	2.07298e-30	3.41346e-28	up	yes
ENSG00000085999	RAD54L	8438,546	ENST00000371975;ENST00000664182;ENST00000668565;ENST00000442598;ENST00000655446;ENST00000473251;ENST00000668390;ENST00000661701;ENST00000671528;ENST00000493985;ENST00000657122;ENST00000463715	GO:0000166(nucleotide binding);GO:0000724(double-strand break repair via homologous recombination);GO:0003677(DNA binding);GO:0003678(DNA helicase activity);GO:0004386(helicase activity);GO:0005515(protein binding);GO:0005524(ATP binding);GO:0005634(nucleus);GO:0005654(nucleoplasm);GO:0006281(DNA repair);GO:0006302(double-strand break repair);GO:0006310(DNA recombination);GO:0006338(chromatin rem…	03440(Homologous recombination);03440(Homologous recombination)	NA	NA	NA	RAD54 like [Source:HGNC Symbol;Acc:HGNC:9826]	protein_coding;retained_intron;nonsense_mediated_decay;processed_transcript	DOID:0050686(organ_system_cancer);DOID:0060083(immune_system_cancer);DOID:1036(chronic_leukemia);DOID:1240(leukemia);DOID:14566(disease_of_cellular_proliferation);DOID:162(cancer);DOID:2531(hematologic_cancer);DOID:2914(immune_system_disease);DOID:4(disease);DOID:612(primary_immunodeficiency_disease);DOID:627(severe_combined_immunodeficiency);DOID:628(combined_T_cell_and_B_cell_immunodeficiency);…	NA	0.404589	0.328147	0.387323	0.377228	0.472414	0.384147	0.438136	0.480285	0.792488	0.988887	0.363913	0.426169	0.622831	1.09388	0.0855789	0.0922162	0.0651115	0.132658	0.0851432	0.0321035	0.0188444	0.0340299	0.0483359	0.0508651	0.0236337	0.053247	0.0661332	0.0329184	9.21085	3.20333	2.12037e-30	3.47724e-28	up	yes
ENSG00000163257	DCAF16	54876	ENST00000507731;ENST00000382247;ENST00000507768	GO:0005515(protein binding);GO:0005634(nucleus);GO:0005654(nucleoplasm);GO:0016567(protein ubiquitination);GO:0080008(Cul4-RING E3 ubiquitin ligase complex);GO:0080008(Cul4-RING E3 ubiquitin ligase complex)	NA	NA	NA	NA	DDB1 and CUL4 associated factor 16 [Source:HGNC Symbol;Acc:HGNC:25987]	processed_transcript;protein_coding	NA	R-HSA-8952638(AcM-UBE2M transfers NEDD8 to CRL4 E3 ubiquitin ligase complex);R-HSA-8952639(NEDD8:AcM-UBE2M binds CRL4 E3 ubiquitin ligase complex);R-HSA-8955245(CAND1 binds CRL4 E3 ubiquitin ligase in the nucleus);R-HSA-8955285(COMMDs displace CAND1 from CRL4 E3 ubiquitin ligase complex);R-HSA-8956045(COP9 signalosome deneddylates nuclear CRL4 E3 ubiquitin ligase complex)	1.37229	1.28578	2.59741	1.64072	1.89252	3.7642	2.79513	3.29334	2.99508	2.86698	3.63152	3.10392	4.54027	4.12356	6.76366	4.33673	5.7517	7.4776	7.95392	3.66	5.05134	2.39579	3.04319	1.22773	4.75494	9.34202	4.71101	7.51247	0.539356	-0.89069	2.23924e-30	3.65724e-28	down	no
ENSG00000182700	IGIP	492311	ENST00000333305	GO:0005576(extracellular region)	NA	NA	NA	NA	IgA inducing protein [Source:HGNC Symbol;Acc:HGNC:33847]	protein_coding	NA	NA	0.981621	0.418838	1.48036	0.678354	1.16478	1.50238	1.00118	1.27312	1.39352	0.908913	1.84313	1.67741	1.7089	2.01286	0.269284	0.301898	0.275055	0.409447	0.379531	0.076607	0.203935	0.274976	0.097814	0.023397	0.200422	0.351063	0.34338	0.411457	4.9873	2.31826	2.36097e-30	3.84044e-28	up	yes
ENSG00000120265	PCMT1	5110	ENST00000367384;ENST00000494411;ENST00000464889;ENST00000480010;ENST00000367380;ENST00000460828;ENST00000544496;ENST00000495487;ENST00000484601;ENST00000486585;ENST00000367378	GO:0004719(protein-L-isoaspartate (D-aspartate) O-methyltransferase activity);GO:0005515(protein binding);GO:0005737(cytoplasm);GO:0005829(cytosol);GO:0006479(protein methylation);GO:0008168(methyltransferase activity);GO:0016740(transferase activity);GO:0030091(protein repair);GO:0032259(methylation);GO:0036211(protein modification process);GO:0045296(cadherin binding);GO:0070062(extracellular e…	NA	K00573	EC:2.1.1.77	NA	protein-L-isoaspartate (D-aspartate) O-methyltransferase [Source:HGNC Symbol;Acc:HGNC:8728]	protein_coding;nonsense_mediated_decay;processed_transcript	DOID:1089(tethered_spinal_cord_syndrome);DOID:1100(ovarian_disease);DOID:150(disease_of_mental_health);DOID:1561(cognitive_disorder);DOID:15(reproductive_system_disease);DOID:229(female_reproductive_system_disease);DOID:2468(psychotic_disorder);DOID:319(spinal_cord_disease);DOID:331(central_nervous_system_disease);DOID:4(disease);DOID:5419(schizophrenia);DOID:5426(premature_ovarian_failure);DOID:…	R-HSA-5676966(PCMT1 transfers CH3 from AdoMet to isoAsp to form MetAsp)	8.07733	6.32917	8.40607	9.18088	10.618	10.4487	10.4039	14.8732	14.1781	10.3402	14.6117	11.5348	19.2892	15.8547	5.63267	2.71167	6.79355	5.55244	6.26415	3.82698	5.1389	2.67612	5.0484	1.84419	5.8517	5.55617	5.06581	6.83975	2.38575	1.25445	2.61864e-30	4.24241e-28	up	yes
ENSG00000206562	METTL6	131965	ENST00000383790;ENST00000383789;ENST00000453819;ENST00000489881;ENST00000443029;ENST00000450816;ENST00000584799;ENST00000458728;ENST00000598878;ENST00000485131	GO:0001510(RNA methylation);GO:0005515(protein binding);GO:0005634(nucleus);GO:0005737(cytoplasm);GO:0008033(tRNA processing);GO:0008168(methyltransferase activity);GO:0016740(transferase activity);GO:0019899(enzyme binding);GO:0030488(tRNA methylation);GO:0032259(methylation);GO:0052735(tRNA (cytosine-3-)-methyltransferase activity);GO:0052735(tRNA (cytosine-3-)-methyltransferase activity)	NA	NA	NA	NA	methyltransferase 6, methylcytidine [Source:HGNC Symbol;Acc:HGNC:28343]	protein_coding;processed_transcript	NA	NA	0.526831	0.2833	0.587308	0.389301	0.565586	0.507886	0.614466	0.597826	0.778564	0.782253	0.82876	0.727844	1.05541	1.18968	0.207761	0.164235	0.229292	0.256262	0.267072	0.182892	0.215696	0.0814412	0.170683	0.105223	0.23891	0.319721	0.22146	0.358334	3.12523	1.64396	2.83501e-30	4.57449e-28	up	yes
ENSG00000163636	PSMD6	9861	ENST00000467853;ENST00000463139;ENST00000497315;ENST00000492933;ENST00000476464;ENST00000475036;ENST00000295901;ENST00000394431;ENST00000480205;ENST00000482510;ENST00000497323;ENST00000478185	GO:0000502(proteasome complex);GO:0005515(protein binding);GO:0005576(extracellular region);GO:0005654(nucleoplasm);GO:0005829(cytosol);GO:0005838(proteasome regulatory particle);GO:0022624(proteasome accessory complex);GO:0030234(enzyme regulator activity);GO:0034774(secretory granule lumen);GO:0043161(proteasome-mediated ubiquitin-dependent protein catabolic process);GO:0050790(regulation of ca…	03050(Proteasome);05010(Alzheimer disease);05012(Parkinson disease);05014(Amyotrophic lateral sclerosis);05016(Huntington disease);05017(Spinocerebellar ataxia);05020(Prion disease);05022(Pathways of neurodegeneration - multiple diseases);05169(Epstein-Barr virus infection);05169(Epstein-Barr virus infection)	NA	NA	NA	proteasome 26S subunit, non-ATPase 6 [Source:HGNC Symbol;Acc:HGNC:9564]	retained_intron;protein_coding	NA	R-HSA-1168640(Ubiquitinated IkB is degraded);R-HSA-1234159(Proteasome proteolyzes ub-HIF-alpha);R-HSA-1236935(Proteasomal cleavage of substrate);R-HSA-1236970(Proteasomal clevage of exogenous antigen);R-HSA-1504193(Ubiquitinated DVL is degraded by the proteasome);R-HSA-174058(Degradation of multiubiquitinated Cdh1);R-HSA-174105(Degradation of multiubiquitinated cell cycle proteins);R-HSA-174202(D…	2.53486	2.34404	3.58457	2.41786	3.77558	4.84766	3.67125	5.41519	4.21107	3.63603	3.59775	4.051	5.72464	5.3229	5.84782	4.28437	6.57694	6.92161	6.287	3.68428	4.59713	3.12595	3.84649	1.57329	5.61052	7.27387	4.28195	7.14599	0.775916	-0.366028	2.92942e-30	4.70793e-28	down	no
ENSG00000279088	ENSG00000279088		ENST00000625041	NA	NA	NA	NA	NA	TEC	TEC	NA	NA	1.16309	0.381782	2.02464	1.2384	1.74862	2.42138	2.65374	5.03075	1.94515	2.64165	2.0407	2.49419	2.90301	2.52028	8.32257	5.92857	6.07182	7.18971	7.53866	5.68879	5.97024	3.48303	7.36012	3.48975	6.19556	7.62513	4.69899	8.01972	0.356319	-1.48876	3.04221e-30	4.86972e-28	down	yes
ENSG00000112984	KIF20A	10112	ENST00000394894;ENST00000503417;ENST00000502338;ENST00000511638	GO:0000166(nucleotide binding);GO:0000281(mitotic cytokinesis);GO:0001578(microtubule bundle formation);GO:0003777(microtubule motor activity);GO:0005515(protein binding);GO:0005524(ATP binding);GO:0005634(nucleus);GO:0005654(nucleoplasm);GO:0005737(cytoplasm);GO:0005794(Golgi apparatus);GO:0005819(spindle);GO:0005856(cytoskeleton);GO:0005871(kinesin complex);GO:0005874(microtubule);GO:0007018(mi…	NA	NA	NA	NA	kinesin family member 20A [Source:HGNC Symbol;Acc:HGNC:9787]	protein_coding;retained_intron;nonsense_mediated_decay	DOID:0050686(organ_system_cancer);DOID:10595(Charcot_Marie_Tooth_disease);DOID:14566(disease_of_cellular_proliferation);DOID:162(cancer);DOID:170(endocrine_gland_cancer);DOID:1793(pancreatic_cancer);DOID:440(neuromuscular_disease);DOID:4(disease);DOID:7(disease_of_anatomical_entity);DOID:863(nervous_system_disease);DOID:870(neuropathy)	R-HSA-156723(Regulation of KIF20A (MKL2) by phosphorylation);R-HSA-2213248(Transport of antigen loaded MHC II molecules to surface);R-HSA-6811423(Retrograde vesicle is tethered at the ER by the NRZ complex and t-SNAREs);R-HSA-6811426(Retrograde COPI vesicles bind kinesin and microtubules);R-HSA-983259(Kinesins move along microtubules consuming ATP);R-HSA-983266(Kinesins bind microtubules);R-HSA-9…	1.14268	1.41061	1.06995	1.90542	1.59366	1.63588	1.04318	1.52625	3.10615	4.35418	0.422482	4.05337	3.51665	3.97126	0.128599	0.0938731	0.322295	0.140708	0.175182	0.169353	0.124889	0.0224187	0.214751	0.117087	0.092654	0.0708644	0.225421	0.0713867	15.6141	3.96478	3.07642e-30	4.90494e-28	up	yes
ENSG00000271964	ENSG00000271964		ENST00000607464	NA	NA	NA	NA	NA	novel transcript, antisense to RFTN1	lncRNA	NA	NA	0.548915	0.373058	0.404772	1.02302	0.474049	3.14699	2.05714	1.67365	0.699919	1.21678	0.701865	1.22145	0.886026	0.839642	5.42846	6.08292	4.85687	5.66558	11.2353	7.11281	5.00972	7.49582	8.60683	4.01854	4.36664	7.9751	5.28599	9.20001	0.165336	-2.59652	3.98702e-30	6.33165e-28	down	yes
ENSG00000230002	ALMS1-IT1	100874291	ENST00000441587	NA	NA	NA	NA	NA	ALMS1 intronic transcript 1 [Source:HGNC Symbol;Acc:HGNC:41305]	lncRNA	NA	NA	0.051018	0.008704	0.090221	0.104976	0.194796	0.138037	0.127375	0.369144	0.101841	0.094779	0.048368	0.051574	0.050654	0.135448	0.818325	0.551245	0.72569	0.830764	0.788064	0.581902	0.644348	0.268917	0.377439	0.241672	0.614376	0.667205	0.648789	0.687452	0.18552	-2.43036	4.06491e-30	6.42991e-28	down	yes
ENSG00000118503	TNFAIP3	7128	ENST00000421450;ENST00000433680;ENST00000698329;ENST00000612899;ENST00000420009;ENST00000485192;ENST00000237289	GO:0001922(B-1 B cell homeostasis);GO:0002020(protease binding);GO:0002237(response to molecule of bacterial origin);GO:0002634(regulation of germinal center formation);GO:0002677(negative regulation of chronic inflammatory response);GO:0003677(DNA binding);GO:0003824(catalytic activity);GO:0004842(ubiquitin-protein transferase activity);GO:0004843(cysteine-type deubiquitinase activity);GO:000551…	04064(NF-kappa B signaling pathway);04217(Necroptosis);04621(NOD-like receptor signaling pathway);04657(IL-17 signaling pathway);04668(TNF signaling pathway);05162(Measles);05169(Epstein-Barr virus infection);05169(Epstein-Barr virus infection)	K11859	EC:3.4.19.12	NA	TNF alpha induced protein 3 [Source:HGNC Symbol;Acc:HGNC:11896]	protein_coding;retained_intron	DOID:0014667(disease_of_metabolism);DOID:0050013(carbohydrate_metabolism_disease);DOID:0050686(organ_system_cancer);DOID:0060056(hypersensitivity_reaction_disease);DOID:0060083(immune_system_cancer);DOID:0060158(acquired_metabolic_disease);DOID:0080001(bone_disease);DOID:1036(chronic_leukemia);DOID:1037(lymphoblastic_leukemia);DOID:1040(chronic_lymphocytic_leukemia);DOID:1240(leukemia);DOID:1287(…	R-HSA-140978(TRADD:TRAF2:RIP1 complex binds FADD);R-HSA-5357776(TNF:TNFR1:TRADD:TRAF2:K63polyUb-RIPK1:BIRC2,3:LUBAC recruits IKKA:IKBKB:IKBKG);R-HSA-5357845(RIPK1 is deubiquitinated);R-HSA-5357860(TNF:TNFR1:TRADD:TRAF2:K63polyUb-RIPK1:BIRC2/3 recruits TAK1 complex);R-HSA-5690827(TNFAIP3 (A20) ubiquitinates RIPK1);R-HSA-5690845(TNIPs bind TNFAIP3 (A20));R-HSA-5690856(TNFAIP3 (A20) deubiquitinates …	6.45352	7.21976	8.76908	6.71125	6.88995	26.4818	15.432	36.6939	13.2738	6.49709	10.9245	8.37482	11.0618	13.0503	119.752	74.7497	84.7966	49.6978	156.822	84.6953	74.0876	26.0347	36.0003	7.93229	45.4176	119.552	33.4381	116.444	0.172751	-2.53323	4.34606e-30	6.84769e-28	down	yes
ENSG00000186522	SEPTIN10	151011	ENST00000415095;ENST00000437928;ENST00000397712;ENST00000397714;ENST00000356688;ENST00000483047;ENST00000468616;ENST00000461295;ENST00000486678	GO:0000166(nucleotide binding);GO:0003924(GTPase activity);GO:0005515(protein binding);GO:0005525(GTP binding);GO:0005737(cytoplasm);GO:0005856(cytoskeleton);GO:0005940(septin ring);GO:0007049(cell cycle);GO:0008104(protein localization);GO:0015630(microtubule cytoskeleton);GO:0031105(septin complex);GO:0032153(cell division site);GO:0051301(cell division);GO:0060090(molecular adaptor activity);G…	NA	NA	NA	NA	septin 10 [Source:HGNC Symbol;Acc:HGNC:14349]	protein_coding;retained_intron;processed_transcript;nonsense_mediated_decay	DOID:0050686(organ_system_cancer);DOID:0060083(immune_system_cancer);DOID:1036(chronic_leukemia);DOID:1037(lymphoblastic_leukemia);DOID:1040(chronic_lymphocytic_leukemia);DOID:1240(leukemia);DOID:14566(disease_of_cellular_proliferation);DOID:162(cancer);DOID:2531(hematologic_cancer);DOID:4(disease)	NA	1.44326	1.45691	1.09726	1.60387	1.47105	1.31059	1.34318	1.91772	1.84857	2.47915	0.255056	2.01571	1.95561	1.91573	0.32312	0.160232	0.1905	0.3541	0.276719	0.186117	0.0786837	0.0341057	0.120294	0.105722	0.234989	0.152756	0.171762	0.268563	8.32072	3.05671	4.57085e-30	7.17374e-28	up	yes
ENSG00000159228	CBR1	873	ENST00000290349;ENST00000530908;ENST00000439427;ENST00000466328;ENST00000399191	GO:0004090(carbonyl reductase (NADPH) activity);GO:0005737(cytoplasm);GO:0005829(cytosol);GO:0006629(lipid metabolic process);GO:0006805(xenobiotic metabolic process);GO:0008211(glucocorticoid metabolic process);GO:0016491(oxidoreductase activity);GO:0016616(oxidoreductase activity, acting on the CH-OH group of donors, NAD or NADP as acceptor);GO:0016655(oxidoreductase activity, acting on NAD(P)H…	00590(Arachidonic acid metabolism);00790(Folate biosynthesis);00980(Metabolism of xenobiotics by cytochrome P450);01100(Metabolic pathways);05204(Chemical carcinogenesis);05204(Chemical carcinogenesis)	K00079	EC:1.1.1.184;EC:1.1.1.189;EC:1.1.1.197	NA	carbonyl reductase 1 [Source:HGNC Symbol;Acc:HGNC:1548]	protein_coding;processed_transcript	DOID:14566(disease_of_cellular_proliferation);DOID:162(cancer);DOID:4(disease)	R-HSA-2161651(PGE2 is converted to PGF2a by CBR1)	1.99771	3.11386	4.87477	5.45949	5.8364	5.88643	4.18156	5.58701	9.40758	6.54392	8.60931	5.28694	8.95294	6.93998	1.67691	1.58039	2.31575	2.34118	2.44187	1.25855	1.95679	0.806655	0.892543	0.532011	2.23493	1.43043	1.50385	2.12116	3.58021	1.84005	4.63244e-30	7.24211e-28	up	yes
ENSG00000154710	RABGEF1	27342	ENST00000461017;ENST00000442563;ENST00000284957;ENST00000439720;ENST00000450873;ENST00000607882	GO:0001933(negative regulation of protein phosphorylation);GO:0002686(negative regulation of leukocyte migration);GO:0003677(DNA binding);GO:0005085(guanyl-nucleotide exchange factor activity);GO:0005515(protein binding);GO:0005730(nucleolus);GO:0005737(cytoplasm);GO:0005768(endosome);GO:0005769(early endosome);GO:0005829(cytosol);GO:0006468(protein phosphorylation);GO:0006612(protein targeting t…	NA	NA	NA	NA	RAB guanine nucleotide exchange factor 1 [Source:HGNC Symbol;Acc:HGNC:17676]	processed_transcript;protein_coding;nonsense_mediated_decay	NA	R-HSA-8854222(TBC1D3 associates with RAB5);R-HSA-8875320(RAB5 GEFs exchange GTP for GDP on RAB5)	2.1402	1.23022	2.49485	1.78047	2.62512	3.20758	3.10255	4.20905	3.05584	2.76566	3.54799	3.00317	4.75967	4.98773	9.44846	4.78035	6.87163	7.13045	7.7565	4.8978	5.73548	2.48135	5.86171	1.0989	4.86706	8.68645	4.38689	10.3978	0.508409	-0.975939	5.51577e-30	8.58963e-28	down	no
ENSG00000135070	ISCA1	81689	ENST00000326094;ENST00000375991;ENST00000637705;ENST00000311534	GO:0005737(cytoplasm);GO:0005739(mitochondrion);GO:0005759(mitochondrial matrix);GO:0016226(iron-sulfur cluster assembly);GO:0046872(metal ion binding);GO:0051536(iron-sulfur cluster binding);GO:0051537(2 iron, 2 sulfur cluster binding);GO:0097428(protein maturation by iron-sulfur cluster transfer);GO:0097428(protein maturation by iron-sulfur cluster transfer)	NA	NA	NA	NA	iron-sulfur cluster assembly 1 [Source:HGNC Symbol;Acc:HGNC:28660]	protein_coding	DOID:0060056(hypersensitivity_reaction_disease);DOID:12894(Sjogren's_syndrome);DOID:225(syndrome);DOID:2914(immune_system_disease);DOID:417(hypersensitivity_reaction_type_II_disease);DOID:4(disease);DOID:7(disease_of_anatomical_entity)	R-HSA-8878815(Formation of 4Fe-4S cluster on ISCA1:ISCA2)	3.62035	2.22437	4.51644	3.01692	3.51078	6.10281	4.28369	6.55279	5.09856	4.48054	4.56901	4.65422	5.82501	6.12566	9.42419	6.04323	7.36007	11.0519	9.27259	6.19137	7.00115	3.52168	7.6605	2.3992	7.80653	9.91926	5.26167	11.3432	0.619444	-0.690954	6.39286e-30	9.91708e-28	down	no
ENSG00000277687	ENSG00000277687		ENST00000613826	NA	NA	NA	NA	NA	novel transcript, sense intronic to CACUL1	lncRNA	NA	NA	0.547001	0.745389	0.208119	0.283041	1.08196	0.625423	0.696159	1.2088	0.486688	0.19445	0.222491	0.660787	0.830073	0.708032	5.7826	3.5095	4.53118	6.9463	5.63537	2.78943	3.89233	2.04353	1.52608	0.346634	4.21155	7.1241	2.73062	6.93303	0.146519	-2.77084	6.92441e-30	1.07004e-27	down	yes
ENSG00000109118	PHF12	57649	ENST00000577226;ENST00000583747;ENST00000483934;ENST00000584822;ENST00000582436;ENST00000579563;ENST00000332830;ENST00000268756;ENST00000584236;ENST00000579036;ENST00000578900;ENST00000584685;ENST00000582655;ENST00000583524;ENST00000378879;ENST00000582853	GO:0000122(negative regulation of transcription by RNA polymerase II);GO:0001222(transcription corepressor binding);GO:0003712(transcription coregulator activity);GO:0003714(transcription corepressor activity);GO:0005515(protein binding);GO:0005634(nucleus);GO:0005654(nucleoplasm);GO:0006355(regulation of DNA-templated transcription);GO:0016580(Sin3 complex);GO:0017053(transcription repressor com…	NA	NA	NA	NA	PHD finger protein 12 [Source:HGNC Symbol;Acc:HGNC:20816]	protein_coding;processed_transcript;nonsense_mediated_decay;retained_intron	NA	NA	6.13937	3.617	5.08667	3.27556	4.89354	8.35251	7.22284	9.15606	5.49778	6.18798	8.62758	6.48212	8.71407	8.83153	14.1636	8.59904	13.4772	16.4578	13.8393	7.4217	10.8783	8.14466	6.89069	2.83721	13.3832	14.5004	8.32685	15.5385	0.596176	-0.746189	7.20845e-30	1.10966e-27	down	no
ENSG00000013297	CLDN11	5010	ENST00000064724;ENST00000486429;ENST00000489485;ENST00000477531;ENST00000643053	GO:0005198(structural molecule activity);GO:0005515(protein binding);GO:0005811(lipid droplet);GO:0005883(neurofilament);GO:0005886(plasma membrane);GO:0005923(bicellular tight junction);GO:0007155(cell adhesion);GO:0007283(spermatogenesis);GO:0008366(axon ensheathment);GO:0016020(membrane);GO:0016021(integral component of membrane);GO:0016338(calcium-independent cell-cell adhesion via plasma mem…	04514(Cell adhesion molecules);04530(Tight junction);04670(Leukocyte transendothelial migration);05130(Pathogenic Escherichia coli infection);05160(Hepatitis C);05160(Hepatitis C)	NA	NA	NA	claudin 11 [Source:HGNC Symbol;Acc:HGNC:8514]	protein_coding;retained_intron;processed_transcript	DOID:331(central_nervous_system_disease);DOID:4(disease);DOID:7(disease_of_anatomical_entity);DOID:863(nervous_system_disease);DOID:936(brain_disease);DOID:9588(encephalitis)	R-HSA-420019(Claudins create paired strands through homophilic and heterophilic cis and trans interactions)	0.343748	0.566143	0.379252	0.532873	0.50278	0.484067	0.465301	0.47215	0.387214	0.651302	0.0358412	0.474677	0.389367	0.595345	0.0137849	0.0135398	0.0142981	0.0141104	0	0	0	0	0.035198	0	0.00736509	0.0317728	0	0	48.2825	5.59343	8.23589e-30	1.26298e-27	up	yes
ENSG00000173011	TADA2B	93624	ENST00000310074;ENST00000515646;ENST00000510704;ENST00000506692;ENST00000512388	GO:0000124(SAGA complex);GO:0003682(chromatin binding);GO:0003713(transcription coactivator activity);GO:0005515(protein binding);GO:0005634(nucleus);GO:0005654(nucleoplasm);GO:0006282(regulation of DNA repair);GO:0006338(chromatin remodeling);GO:0006357(regulation of transcription by RNA polymerase II);GO:0008270(zinc ion binding);GO:0035065(regulation of histone acetylation);GO:0035066(positive…	NA	NA	NA	MYB	transcriptional adaptor 2B [Source:HGNC Symbol;Acc:HGNC:30781]	protein_coding	NA	R-HSA-3301237(KAT2 complexes acetylate histone H3);R-HSA-5690080(USP3,SAGA deubiquitinate Histone H2A,H2B)	5.9026	3.14076	6.32415	3.94273	6.26601	9.40512	8.83217	11.1009	7.5718	6.82882	9.78795	7.68888	11.767	11.6346	12.3168	7.65465	14.4431	17.2555	16.4535	7.87657	13.7864	7.85347	8.64481	2.88095	15.2453	15.2456	10.8976	17.2477	0.656688	-0.606721	8.69384e-30	1.32814e-27	down	no
ENSG00000120526	NUDCD1	84955	ENST00000239690;ENST00000676569;ENST00000679027;ENST00000678094;ENST00000676990;ENST00000677737;ENST00000678168;ENST00000519607	GO:0002376(immune system process);GO:0005515(protein binding);GO:0005634(nucleus);GO:0005654(nucleoplasm);GO:0005737(cytoplasm);GO:0005829(cytosol);GO:0005829(cytosol)	NA	NA	NA	NA	NudC domain containing 1 [Source:HGNC Symbol;Acc:HGNC:24306]	protein_coding;retained_intron;processed_transcript;nonsense_mediated_decay	NA	NA	0.231785	0.210369	0.543887	0.331297	0.422712	0.430193	0.275728	0.590288	0.780976	0.880078	0.388475	0.718216	1.02432	0.968794	0.135404	0.0952307	0.170601	0.207955	0.112111	0.0469571	0.0924259	0.0334632	0.0552664	0.0418462	0.0714595	0.11305	0.14918	0.128522	5.36448	2.42344	8.76599e-30	1.33409e-27	up	yes
ENSG00000132357	CARD6	84674	ENST00000254691;ENST00000381677	GO:0005515(protein binding);GO:0006915(apoptotic process);GO:0042981(regulation of apoptotic process);GO:0042981(regulation of apoptotic process)	04621(NOD-like receptor signaling pathway);04621(NOD-like receptor signaling pathway)	NA	NA	NA	caspase recruitment domain family member 6 [Source:HGNC Symbol;Acc:HGNC:16394]	protein_coding	NA	NA	1.64286	3.01861	3.8908	3.09648	3.66264	5.34841	3.50914	5.61187	4.65423	2.89876	8.00773	2.97072	4.50724	6.63137	1.23043	0.412042	1.28033	0.968416	0.855697	0.315761	1.11538	0.321074	0.497896	0.138894	1.25219	0.814455	1.61185	1.33023	4.89523	2.29138	9.10267e-30	1.3801e-27	up	yes
ENSG00000123975	CKS2	1164	ENST00000314355	GO:0000307(cyclin-dependent protein kinase holoenzyme complex);GO:0003682(chromatin binding);GO:0005515(protein binding);GO:0006357(regulation of transcription by RNA polymerase II);GO:0007049(cell cycle);GO:0007127(meiosis I);GO:0007346(regulation of mitotic cell cycle);GO:0016538(cyclin-dependent protein serine/threonine kinase regulator activity);GO:0019005(SCF ubiquitin ligase complex);GO:001…	05200(Pathways in cancer);05222(Small cell lung cancer)	NA	NA	NA	CDC28 protein kinase regulatory subunit 2 [Source:HGNC Symbol;Acc:HGNC:2000]	protein_coding	DOID:0050686(organ_system_cancer);DOID:14566(disease_of_cellular_proliferation);DOID:162(cancer);DOID:3119(gastrointestinal_system_cancer);DOID:3571(liver_cancer);DOID:4(disease);DOID:684(hepatocellular_carcinoma);DOID:686(liver_carcinoma)	NA	7.04965	6.98542	6.58942	5.95178	7.56973	7.2024	6.58562	8.36289	15.559	17.8391	3.71514	10.6841	16.0422	14.0302	2.00789	1.22218	1.43008	1.71124	1.34353	1.77558	1.41061	0.36655	0.763685	0.42783	1.58352	1.63417	0.246037	2.62552	7.23332	2.85466	1.02946e-29	1.55495e-27	up	yes
ENSG00000290062	ENSG00000290062		ENST00000702724	NA	NA	NA	NA	NA	novel transcript, antisense to NEDD9	lncRNA	NA	NA	1.89658	1.36185	1.33844	1.18859	2.12045	4.13497	2.93801	3.8139	1.85392	1.35409	1.43044	1.56164	2.31155	2.34207	7.034	6.09714	9.01927	8.70207	8.406	5.26639	5.30439	3.46603	3.81841	1.10656	6.25335	8.83725	5.04296	10.2554	0.334576	-1.5796	1.05211e-29	1.58321e-27	down	yes
ENSG00000274600	RIMBP3B	440804	ENST00000620804	GO:0002177(manchette);GO:0005515(protein binding);GO:0005634(nucleus);GO:0005737(cytoplasm);GO:0005856(cytoskeleton);GO:0007283(spermatogenesis);GO:0007286(spermatid development);GO:0009566(fertilization);GO:0030154(cell differentiation);GO:0030156(benzodiazepine receptor binding)	NA	NA	NA	NA	RIMS binding protein 3B [Source:HGNC Symbol;Acc:HGNC:33891]	protein_coding	NA	NA	0.150056	0.197149	0.204676	0.152733	0.292335	0.156022	0.121283	0.144748	0.264046	0.420796	0.558504	0.290688	0.200084	0.365719	0.01233	0.003352	0.009809	0.052148	0.007476	0	0.006908	0.017785	0.004977	0.010178	0.007893	0.015644	0.041248	0.014395	17.2371	4.10745	1.52561e-29	2.28716e-27	up	yes
ENSG00000072571	HMMR	3161	ENST00000353866;ENST00000393915;ENST00000517936;ENST00000358715;ENST00000520345;ENST00000521108	GO:0005515(protein binding);GO:0005540(hyaluronic acid binding);GO:0005737(cytoplasm);GO:0005813(centrosome);GO:0005819(spindle);GO:0005829(cytosol);GO:0005856(cytoskeleton);GO:0005886(plasma membrane);GO:0009986(cell surface);GO:0015630(microtubule cytoskeleton);GO:0016020(membrane);GO:0016020(membrane)	04512(ECM-receptor interaction);04512(ECM-receptor interaction)	NA	NA	NA	hyaluronan mediated motility receptor [Source:HGNC Symbol;Acc:HGNC:5012]	protein_coding;retained_intron	DOID:0050177(monogenic_disease);DOID:0050686(organ_system_cancer);DOID:0050687(cell_type_cancer);DOID:0050736(autosomal_dominant_disease);DOID:0050739(autosomal_genetic_disease);DOID:0060083(immune_system_cancer);DOID:1036(chronic_leukemia);DOID:1240(leukemia);DOID:14566(disease_of_cellular_proliferation);DOID:162(cancer);DOID:1749(squamous_cell_carcinoma);DOID:2531(hematologic_cancer);DOID:305(c…	R-HSA-2160884(HA:HAR:HYAL2 binds to SLC9A1:p-CHP:Ca2+);R-HSA-2160892(Hyaluronidase 2 (HYAL2) hydrolyses HA into 20kDa fragments);R-HSA-2160915(Receptor-mediated uptake of HA);R-HSA-8853405(TPX2 binds AURKA at centrosomes);R-HSA-8853419(TPX2 promotes AURKA autophosphorylation)	0.955812	0.906977	0.92494	0.953146	1.00392	1.04449	0.85314	1.28731	1.92631	2.57152	0.246349	1.90898	2.47037	2.83343	0.0864185	0	0.145529	0.126135	0.0850869	0.127139	0.0227558	0	0.0499197	0.0604749	0.0553519	0.0670201	0.112121	0.0616984	19.8937	4.31424	1.74706e-29	2.60942e-27	up	yes
ENSG00000070444	MNT	4335	ENST00000174618;ENST00000575394;ENST00000575402;ENST00000573384;ENST00000575374;ENST00000571836;ENST00000572892;ENST00000571232;ENST00000574559	GO:0000122(negative regulation of transcription by RNA polymerase II);GO:0000785(chromatin);GO:0000977(RNA polymerase II transcription regulatory region sequence-specific DNA binding);GO:0000978(RNA polymerase II cis-regulatory region sequence-specific DNA binding);GO:0000981(DNA-binding transcription factor activity, RNA polymerase II-specific);GO:0001227(DNA-binding transcription repressor acti…	NA	NA	NA	bHLH	MAX network transcriptional repressor [Source:HGNC Symbol;Acc:HGNC:7188]	protein_coding;retained_intron;processed_transcript	DOID:0050686(organ_system_cancer);DOID:0060083(immune_system_cancer);DOID:1240(leukemia);DOID:12603(acute_leukemia);DOID:14566(disease_of_cellular_proliferation);DOID:162(cancer);DOID:2531(hematologic_cancer);DOID:4(disease)	NA	3.05847	2.56618	3.53627	2.24479	3.76943	6.14636	4.49324	5.5334	4.28315	3.71631	5.42344	4.16357	4.18531	4.57399	7.3168	5.3428	8.95662	10.4177	9.02705	3.65581	6.14253	5.45829	4.87588	1.99028	9.03802	8.56146	7.63816	10.2789	0.584536	-0.774636	1.90246e-29	2.831e-27	down	no
ENSG00000066279	ASPM	259266	ENST00000680265;ENST00000680710;ENST00000367409;ENST00000367408;ENST00000294732;ENST00000679766;ENST00000680112	GO:0000922(spindle pole);GO:0001764(neuron migration);GO:0002052(positive regulation of neuroblast proliferation);GO:0005515(protein binding);GO:0005516(calmodulin binding);GO:0005634(nucleus);GO:0005737(cytoplasm);GO:0005813(centrosome);GO:0005819(spindle);GO:0005856(cytoskeleton);GO:0005874(microtubule);GO:0007010(cytoskeleton organization);GO:0007049(cell cycle);GO:0007051(spindle organization…	NA	NA	NA	NA	assembly factor for spindle microtubules [Source:HGNC Symbol;Acc:HGNC:19048]	protein_coding;retained_intron	DOID:0050177(monogenic_disease);DOID:0050686(organ_system_cancer);DOID:0050687(cell_type_cancer);DOID:0050736(autosomal_dominant_disease);DOID:0050739(autosomal_genetic_disease);DOID:0080014(chromosomal_disease);DOID:0080015(physical_disorder);DOID:10907(microcephaly);DOID:14566(disease_of_cellular_proliferation);DOID:162(cancer);DOID:171(neuroectodermal_tumor);DOID:1932(Angelman_syndrome);DOID:2…	NA	0.365714	0.35043	0.313598	0.457543	0.444337	0.377304	0.328935	0.612743	0.938499	1.51122	0.222241	0.842388	1.22897	1.51907	0.0276644	0.0586708	0.10451	0.0800238	0.062851	0.0583216	0.0946107	0.00695192	0.0445979	0.0401173	0.0754693	0.0333031	0.0746477	0.0862575	11.2182	3.48777	1.95347e-29	2.89618e-27	up	yes
ENSG00000145147	SLIT2	9353	ENST00000504154;ENST00000508541;ENST00000503823;ENST00000509099;ENST00000622093;ENST00000509941;ENST00000508824;ENST00000511508	GO:0001657(ureteric bud development);GO:0001933(negative regulation of protein phosphorylation);GO:0002042(cell migration involved in sprouting angiogenesis);GO:0002689(negative regulation of leukocyte chemotaxis);GO:0003180(aortic valve morphogenesis);GO:0003184(pulmonary valve morphogenesis);GO:0005095(GTPase inhibitor activity);GO:0005509(calcium ion binding);GO:0005515(protein binding);GO:000…	04360(Axon guidance);04360(Axon guidance)	NA	NA	NA	slit guidance ligand 2 [Source:HGNC Symbol;Acc:HGNC:11086]	protein_coding;retained_intron	DOID:0050161(lower_respiratory_tract_disease);DOID:0050686(organ_system_cancer);DOID:0050687(cell_type_cancer);DOID:0060083(immune_system_cancer);DOID:0060100(musculoskeletal_system_cancer);DOID:1037(lymphoblastic_leukemia);DOID:1192(peripheral_nervous_system_neoplasm);DOID:1240(leukemia);DOID:14566(disease_of_cellular_proliferation);DOID:1579(respiratory_system_disease);DOID:162(cancer);DOID:171…	R-HSA-204364(ROBO1 binds SLIT2);R-HSA-373715(DCC interaction with ROBO1);R-HSA-376140(Ena/VASP proteins bind ROBO1:SLIT2 complex);R-HSA-376141(Interaction of ABL with ROBO1:SLIT2);R-HSA-376145(SRGAP binds ROBO1:SLIT2);R-HSA-376149(Proteolytic processing of SLIT);R-HSA-428511(NCK binds ROBO1:SLIT2);R-HSA-428515(Recruitment of SOS to plasma membrane);R-HSA-428518(Glypican-1 (GPC1) binds SLIT2);R-HS…	0.231049	0.149172	0.119928	0.197039	0.126899	0.113521	0.147892	0.207664	0.470469	0.490325	0.00776703	0.628082	0.450173	0.558548	0.00903025	0.00442417	0.00987254	0.0134959	0.0086817	0	0	0	0.0103029	0	0.0184891	0	0.00469122	0.0128155	42.4661	5.40824	2.01955e-29	2.98315e-27	up	yes
ENSG00000165389	SPTSSA	171546	ENST00000298130	GO:0004758(serine C-palmitoyltransferase activity);GO:0005515(protein binding);GO:0005783(endoplasmic reticulum);GO:0005789(endoplasmic reticulum membrane);GO:0006629(lipid metabolic process);GO:0006665(sphingolipid metabolic process);GO:0008104(protein localization);GO:0016020(membrane);GO:0016021(integral component of membrane);GO:0017059(serine C-palmitoyltransferase complex);GO:0030148(sphing…	NA	NA	NA	NA	serine palmitoyltransferase small subunit A [Source:HGNC Symbol;Acc:HGNC:20361]	protein_coding	NA	R-HSA-428127(palmitoyl-CoA + serine => 3-ketosphinganine + CoASH + CO2)	2.38354	2.6747	4.04852	3.09714	5.47849	5.74467	5.30639	6.28969	5.463	4.48671	4.00578	4.32618	6.48918	7.41623	2.53433	1.56328	2.35894	2.63688	2.36764	1.49101	2.12006	1.05513	1.05651	0.411834	2.32842	2.12701	2.24481	2.67777	2.4917	1.31713	2.0974e-29	3.08679e-27	up	yes
ENSG00000133704	IPO8	10526	ENST00000256079;ENST00000535598;ENST00000545077;ENST00000611458;ENST00000543446;ENST00000544829;ENST00000538338;ENST00000358724	GO:0005515(protein binding);GO:0005634(nucleus);GO:0005635(nuclear envelope);GO:0005654(nucleoplasm);GO:0005737(cytoplasm);GO:0005829(cytosol);GO:0006606(protein import into nucleus);GO:0006886(intracellular protein transport);GO:0007165(signal transduction);GO:0015031(protein transport);GO:0031267(small GTPase binding);GO:0031267(small GTPase binding)	NA	NA	NA	NA	importin 8 [Source:HGNC Symbol;Acc:HGNC:9853]	protein_coding;non_stop_decay;processed_transcript	NA	R-HSA-5578712(Importin-8 binds AGO2:miRNA);R-HSA-5578744(Importin-8 imports AGO2:miRNA into the nucleus)	2.94806	2.72066	4.88719	3.11814	4.78856	5.32217	4.63996	5.57487	5.63212	4.67458	7.19839	5.14854	6.86115	7.96132	2.7339	1.72125	2.87286	3.67248	2.96077	1.49981	2.07027	1.00225	1.22316	0.575036	2.73144	3.40481	2.3203	2.67065	2.27203	1.18398	2.96378e-29	4.34594e-27	up	yes
ENSG00000252061	RNU6-415P	106481309	ENST00000516252	GO:0000244(spliceosomal tri-snRNP complex assembly);GO:0000353(formation of quadruple SL/U4/U5/U6 snRNP);GO:0005688(U6 snRNP);GO:0030621(U4 snRNA binding);GO:0046540(U4/U6 x U5 tri-snRNP complex)	NA	NA	NA	NA	RNA, U6 small nuclear 415, pseudogene [Source:HGNC Symbol;Acc:HGNC:47378]	snRNA	NA	NA	0.20417	0	0	0.312638	0.2038	2.43375	2.47776	1.09258	0.355709	0	0.741007	0.275806	0.521923	0.054432	5.01351	6.47555	11.1742	11.171	9.97807	5.6729	6.62212	4.45953	8.16714	2.29088	11.4852	10.9097	8.22017	12.0348	0.0763017	-3.71214	4.10366e-29	5.99552e-27	down	yes
ENSG00000100554	ATP6V1D	51382	ENST00000216442;ENST00000555012;ENST00000554087;ENST00000555335;ENST00000554236;ENST00000557244;ENST00000553408;ENST00000555431;ENST00000555625;ENST00000553974;ENST00000556058;ENST00000553687	GO:0000139(Golgi membrane);GO:0000221(vacuolar proton-transporting V-type ATPase, V1 domain);GO:0005515(protein binding);GO:0005737(cytoplasm);GO:0005765(lysosomal membrane);GO:0005813(centrosome);GO:0005815(microtubule organizing center);GO:0005829(cytosol);GO:0005856(cytoskeleton);GO:0005886(plasma membrane);GO:0005929(cilium);GO:0006811(ion transport);GO:0007035(vacuolar acidification);GO:0007…	00190(Oxidative phosphorylation);01100(Metabolic pathways);04145(Phagosome);04150(mTOR signaling pathway);04721(Synaptic vesicle cycle);04966(Collecting duct acid secretion);05110(Vibrio cholerae infection);05120(Epithelial cell signaling in Helicobacter pylori infection);05165(Human papillomavirus infection);05323(Rheumatoid arthritis);05323(Rheumatoid arthritis)	NA	NA	NA	ATPase H+ transporting V1 subunit D [Source:HGNC Symbol;Acc:HGNC:13527]	protein_coding;nonsense_mediated_decay;retained_intron;processed_transcript	NA	R-HSA-1222516(Intraphagosomal pH is lowered to 5 by V-ATPase);R-HSA-5252133(ATP6AP1 binds V-ATPase);R-HSA-6799350(Exocytosis of specific granule membrane proteins);R-HSA-74723(Endosome acidification);R-HSA-917841(Acidification of Tf:TfR1 containing endosome);R-HSA-9639286(RRAGC,D exchanges GTP for GDP);R-HSA-9640167(RRAGA,B exchanges GDP for GTP);R-HSA-9640168(v-ATPase:Ragulator:RRAGA,B:GTP:RRAGC…	3.83639	2.41972	3.74817	2.98198	4.10725	4.04631	3.78009	5.21413	4.04804	2.99954	4.11422	3.8346	6.77887	6.32236	1.91214	1.35891	1.95605	1.70908	2.40688	0.950215	1.32406	0.518215	0.869249	0.520243	1.87472	2.04299	1.86442	1.89939	2.74593	1.45729	4.61944e-29	6.72463e-27	up	yes
ENSG00000212978	C2orf74-DT		ENST00000420918;ENST00000417691;ENST00000443946;ENST00000422740	NA	NA	NA	NA	NA	C2orf74 divergent transcript [Source:HGNC Symbol;Acc:HGNC:27941]	lncRNA;retained_intron	NA	NA	0.461795	0.343262	0.425457	0.47256	0.663581	0.677763	0.536311	0.614644	0.623188	0.731812	1.11382	0.845294	1.2506	0.794722	0.291367	0.137674	0.195123	0.198748	0.238607	0.108431	0.187808	0.0491822	0.102946	0.0938224	0.0814772	0.191158	0.181796	0.16053	4.30655	2.10653	4.98064e-29	7.22427e-27	up	yes
ENSG00000009844	VTA1	51534	ENST00000367630;ENST00000452973;ENST00000620996;ENST00000367621;ENST00000491881	GO:0005515(protein binding);GO:0005654(nucleoplasm);GO:0005737(cytoplasm);GO:0005768(endosome);GO:0005771(multivesicular body);GO:0005829(cytosol);GO:0008022(protein C-terminus binding);GO:0010008(endosome membrane);GO:0015031(protein transport);GO:0016020(membrane);GO:0016236(macroautophagy);GO:0032511(late endosome to vacuole transport via multivesicular body sorting pathway);GO:0036258(multive…	04144(Endocytosis);04144(Endocytosis)	NA	NA	NA	vesicle trafficking 1 [Source:HGNC Symbol;Acc:HGNC:20954]	protein_coding;processed_transcript	NA	R-HSA-3159227(HIV Virion Budding);R-HSA-3159232(Recruitment Of HIV Virion Budding Machinery);R-HSA-917693(ESCRT Disassembly)	1.82343	1.43884	2.22947	1.69423	2.38588	3.22074	2.52259	3.35631	3.78557	2.63407	3.49142	2.71944	4.65019	4.43709	1.55642	0.81099	1.50633	1.25275	1.14001	0.716186	1.34247	0.427622	0.938466	0.28559	1.23737	1.93182	1.049	1.88331	2.51203	1.32885	5.4129e-29	7.823e-27	up	yes
ENSG00000152102	FAM168B	130074	ENST00000389915;ENST00000409185	GO:0005737(cytoplasm);GO:0005886(plasma membrane);GO:0016020(membrane);GO:0016021(integral component of membrane);GO:0030424(axon);GO:0042995(cell projection);GO:0048471(perinuclear region of cytoplasm);GO:0070062(extracellular exosome);GO:0070062(extracellular exosome)	NA	NA	NA	NA	family with sequence similarity 168 member B [Source:HGNC Symbol;Acc:HGNC:27016]	protein_coding	NA	NA	6.47152	4.78312	7.60354	6.08698	8.27207	10.5452	9.56467	12.8362	10.7515	10.4344	10.2123	11.7086	16.2737	15.3493	20.2154	9.55195	15.1205	19.7659	18.6469	10.2703	17.2541	8.99334	11.0932	3.17011	14.812	17.9201	12.7804	21.3596	0.701123	-0.512262	5.43415e-29	7.82557e-27	down	no
ENSG00000123415	SMUG1	23583	ENST00000509078;ENST00000505128;ENST00000682136;ENST00000503231;ENST00000513838;ENST00000506595;ENST00000401977;ENST00000505662;ENST00000503306;ENST00000505597;ENST00000509864;ENST00000514685;ENST00000243112;ENST00000506169;ENST00000508394;ENST00000337581;ENST00000514196;ENST00000511854;ENST00000503447;ENST00000634429;ENST00000504338;ENST00000507904;ENST00000635546;ENST00000635234	GO:0000703(oxidized pyrimidine nucleobase lesion DNA N-glycosylase activity);GO:0001650(fibrillar center);GO:0003677(DNA binding);GO:0004844(uracil DNA N-glycosylase activity);GO:0005515(protein binding);GO:0005634(nucleus);GO:0005654(nucleoplasm);GO:0005730(nucleolus);GO:0005829(cytosol);GO:0006281(DNA repair);GO:0006284(base-excision repair);GO:0006974(cellular response to DNA damage stimulus);…	03410(Base excision repair);03410(Base excision repair)	NA	NA	NA	single-strand-selective monofunctional uracil-DNA glycosylase 1 [Source:HGNC Symbol;Acc:HGNC:17148]	retained_intron;protein_coding;processed_transcript;nonsense_mediated_decay	DOID:14566(disease_of_cellular_proliferation);DOID:162(cancer);DOID:4(disease)	R-HSA-110164(SMUG1 glycosylase mediated recognition and binding of uracil in DNA);R-HSA-110221(Cleavage of uracil by SMUG1 glycosylase);R-HSA-110351(Displacement of SMUG1 glycosylase by APEX1 at the AP site)	0.993781	0.51243	1.10775	0.643416	1.19457	1.25563	1.15797	1.54263	1.40941	1.3562	1.40546	1.26721	2.063	1.72243	0.584454	0.267019	0.501442	0.648706	0.53365	0.227894	0.581679	0.257548	0.523871	0.158518	0.540077	0.528893	0.606401	0.506382	2.72664	1.44712	5.65091e-29	8.10865e-27	up	yes
ENSG00000146859	TMEM140	55281	ENST00000275767;ENST00000466307	GO:0005515(protein binding);GO:0016020(membrane);GO:0016021(integral component of membrane);GO:0016021(integral component of membrane)	NA	NA	NA	NA	transmembrane protein 140 [Source:HGNC Symbol;Acc:HGNC:21870]	protein_coding;processed_transcript	NA	NA	33.676	41.4181	43.3568	33.099	46.7803	47.2875	45.4315	43.4818	61.5258	39.66	134.363	27.2843	47.6005	51.2874	10.4634	7.86519	14.2781	15.424	15.2538	5.57592	14.5118	7.50608	6.44488	4.11717	14.3049	15.7338	15.5293	14.39	4.31387	2.10898	5.83123e-29	8.33763e-27	up	yes
ENSG00000134001	EIF2S1	1965	ENST00000256383;ENST00000466499;ENST00000554332;ENST00000556724;ENST00000555876;ENST00000557310	GO:0003676(nucleic acid binding);GO:0003723(RNA binding);GO:0003743(translation initiation factor activity);GO:0005515(protein binding);GO:0005634(nucleus);GO:0005737(cytoplasm);GO:0005829(cytosol);GO:0005844(polysome);GO:0005850(eukaryotic translation initiation factor 2 complex);GO:0005851(eukaryotic translation initiation factor 2B complex);GO:0006412(translation);GO:0006413(translational init…	03013(RNA transport);04140(Autophagy - animal);04141(Protein processing in endoplasmic reticulum);04210(Apoptosis);04932(Non-alcoholic fatty liver disease);05010(Alzheimer disease);05012(Parkinson disease);05014(Amyotrophic lateral sclerosis);05020(Prion disease);05022(Pathways of neurodegeneration - multiple diseases);05160(Hepatitis C);05162(Measles);05164(Influenza A);05168(Herpes simplex viru…	NA	NA	NA	eukaryotic translation initiation factor 2 subunit alpha [Source:HGNC Symbol;Acc:HGNC:3265]	protein_coding;retained_intron	DOID:0014667(disease_of_metabolism);DOID:0050117(disease_by_infectious_agent);DOID:0050686(organ_system_cancer);DOID:0050687(cell_type_cancer);DOID:10652(Alzheimer's_disease);DOID:1289(neurodegenerative_disease);DOID:1307(dementia);DOID:14566(disease_of_cellular_proliferation);DOID:150(disease_of_mental_health);DOID:1561(cognitive_disorder);DOID:162(cancer);DOID:170(endocrine_gland_cancer);DOID:1…	R-HSA-156808(Formation of translation initiation complexes yielding circularized Ceruloplasmin mRNA in a 'closed-loop' conformation);R-HSA-156823(Association of phospho-L13a with GAIT element of Ceruloplasmin mRNA);R-HSA-157849(Formation of translation initiation complexes containing mRNA that does not circularize);R-HSA-381111(EIF2AK3 (PERK) phosphorylates EIF2S1 (eIF2-alpha)Phosphorylation of e…	2.06296	2.16535	3.07288	3.00082	4.01812	4.53455	3.2863	5.07777	6.4577	5.75467	5.91733	5.1336	7.26639	6.78804	2.76655	1.0265	1.93507	1.71124	2.21276	1.21764	1.7852	0.673832	1.0723	0.455189	1.69544	1.59702	1.83223	2.15257	2.91578	1.54388	6.13348e-29	8.73868e-27	up	yes
ENSG00000143079	CTTNBP2NL	55917	ENST00000271277;ENST00000607039;ENST00000502356;ENST00000441739	GO:0005515(protein binding);GO:0005737(cytoplasm);GO:0005856(cytoskeleton);GO:0006470(protein dephosphorylation);GO:0015629(actin cytoskeleton);GO:0030027(lamellipodium);GO:0032410(negative regulation of transporter activity);GO:0034763(negative regulation of transmembrane transport);GO:0042995(cell projection);GO:0051721(protein phosphatase 2A binding);GO:0051721(protein phosphatase 2A binding)	NA	NA	NA	NA	CTTNBP2 N-terminal like [Source:HGNC Symbol;Acc:HGNC:25330]	protein_coding;processed_transcript	NA	NA	0.201372	0.241454	0.35176	0.41293	0.410587	0.401544	0.274411	0.500799	0.574627	0.587879	0.395626	0.515182	0.817894	0.986241	0.125363	0.0603568	0.117741	0.0686456	0.0998559	0.0435596	0.133637	0.0773346	0.023203	0.0345078	0.137145	0.0584085	0.0442469	0.0730824	6.08184	2.60451	6.24731e-29	8.86941e-27	up	yes
ENSG00000230224	PHB1P9		ENST00000453578	NA	NA	NA	NA	NA	PHB1 pseudogene 9 [Source:HGNC Symbol;Acc:HGNC:39288]	processed_pseudogene	NA	NA	0.433087	0.287243	0.539189	0.180607	0.744551	1.5361	1.05162	0.81167	0.805832	0.732093	0.74981	0.610025	1.18448	1.285	4.45723	3.25551	5.36233	5.40876	6.456	2.78434	3.83113	1.75234	1.2478	0.1014	4.10033	5.37883	4.52392	4.94236	0.204307	-2.29119	6.92617e-29	9.79858e-27	down	yes
ENSG00000124641	MED20	9477	ENST00000265350;ENST00000467535;ENST00000482361;ENST00000409060;ENST00000409312;ENST00000434077	GO:0003712(transcription coregulator activity);GO:0003713(transcription coactivator activity);GO:0003899(DNA-directed 5'-3' RNA polymerase activity);GO:0005515(protein binding);GO:0005634(nucleus);GO:0005654(nucleoplasm);GO:0006351(DNA-templated transcription);GO:0006357(regulation of transcription by RNA polymerase II);GO:0006366(transcription by RNA polymerase II);GO:0016592(mediator complex);G…	NA	NA	NA	NA	mediator complex subunit 20 [Source:HGNC Symbol;Acc:HGNC:16840]	protein_coding;processed_transcript	NA	R-HSA-1183003(Expression of Leptin);R-HSA-1183058(Expression of Adiponectin);R-HSA-212380(Formation of TRAP coactivator complex);R-HSA-381309(PPARG:RXRA heterodimer binds to fatty acid-like ligands);R-HSA-560472(Expression of Phosphoenolpyruvate carboxykinase 1 (PEPCK-C));R-HSA-560473(Expression of ANGPTL4);R-HSA-560491(Expression of CEBPA);R-HSA-560493(Expression of Perilipin (PLIN));R-HSA-56049…	1.0582	1.21477	1.85448	1.42205	1.98802	1.56389	1.6983	1.66312	2.03893	1.8866	2.80918	2.30048	2.9442	2.9831	0.669909	0.33572	0.809634	0.654796	0.752715	0.273306	0.706931	0.287732	0.200881	0.177094	0.652241	0.905357	0.554835	1.15551	3.37058	1.753	7.76889e-29	1.09522e-26	up	yes
ENSG00000154277	UCHL1	7345	ENST00000381760;ENST00000284440;ENST00000508768;ENST00000510566;ENST00000514764;ENST00000472501;ENST00000505232;ENST00000512419;ENST00000514924	GO:0002176(male germ cell proliferation);GO:0002931(response to ischemia);GO:0004197(cysteine-type endopeptidase activity);GO:0004843(cysteine-type deubiquitinase activity);GO:0005515(protein binding);GO:0005654(nucleoplasm);GO:0005737(cytoplasm);GO:0005783(endoplasmic reticulum);GO:0005789(endoplasmic reticulum membrane);GO:0005829(cytosol);GO:0005886(plasma membrane);GO:0006508(proteolysis);GO:…	05012(Parkinson disease);05022(Pathways of neurodegeneration - multiple diseases);05022(Pathways of neurodegeneration - multiple diseases)	K05611	EC:3.4.19.12	NA	ubiquitin C-terminal hydrolase L1 [Source:HGNC Symbol;Acc:HGNC:12513]	retained_intron;protein_coding;nonsense_mediated_decay	DOID:0014667(disease_of_metabolism);DOID:0050013(carbohydrate_metabolism_disease);DOID:0050155(sensory_system_disease);DOID:0050177(monogenic_disease);DOID:0050686(organ_system_cancer);DOID:0050687(cell_type_cancer);DOID:0050737(autosomal_recessive_disease);DOID:0050739(autosomal_genetic_disease);DOID:0060100(musculoskeletal_system_cancer);DOID:0060122(integumentary_system_cancer);DOID:0060158(ac…	R-HSA-5690319(UCHL1, UCHL3 cleave ubiquitin adducts)	3.53546	3.87106	2.8466	3.86262	3.39429	3.77839	4.13428	3.98471	4.67327	6.48455	0.509539	5.51682	4.30496	5.29889	0.0912008	0	0.124659	0.142491	0.0415907	0.086525	0	0	0	0	0.156778	0.0795328	0	0.183626	61.9983	5.95416	7.84317e-29	1.10183e-26	up	yes
ENSG00000152683	SLC30A6	55676	ENST00000282587;ENST00000454324;ENST00000379343;ENST00000449777;ENST00000435660;ENST00000457724	GO:0000139(Golgi membrane);GO:0005385(zinc ion transmembrane transporter activity);GO:0005515(protein binding);GO:0005794(Golgi apparatus);GO:0006811(ion transport);GO:0006812(cation transport);GO:0006829(zinc ion transport);GO:0008324(cation transmembrane transporter activity);GO:0016020(membrane);GO:0016021(integral component of membrane);GO:0030070(insulin processing);GO:0055085(transmembrane …	NA	NA	NA	NA	solute carrier family 30 member 6 [Source:HGNC Symbol;Acc:HGNC:19305]	protein_coding;nonsense_mediated_decay	DOID:10652(Alzheimer's_disease);DOID:1289(neurodegenerative_disease);DOID:1307(dementia);DOID:150(disease_of_mental_health);DOID:1561(cognitive_disorder);DOID:331(central_nervous_system_disease);DOID:4(disease);DOID:680(tauopathy);DOID:7(disease_of_anatomical_entity);DOID:863(nervous_system_disease)	R-HSA-437139(ZnT6 transports zinc into the golgi apparatus)	1.86504	1.5514	2.20055	1.87535	2.45214	2.8423	2.43147	3.25425	2.85563	2.96959	3.41956	2.98585	4.83829	4.22528	1.71229	0.988958	1.64703	2.00502	2.16017	0.863141	1.44748	0.838392	0.906793	0.344395	1.68689	1.95439	1.35261	1.88599	2.00907	1.00653	8.81242e-29	1.23368e-26	up	yes
ENSG00000100714	MTHFD1	4522	ENST00000652337;ENST00000697166;ENST00000557370;ENST00000555858;ENST00000650853;ENST00000651537;ENST00000557539;ENST00000697168;ENST00000697177;ENST00000556771;ENST00000555252;ENST00000651891;ENST00000652509;ENST00000556284;ENST00000545908;ENST00000697175;ENST00000554677;ENST00000697170;ENST00000553405;ENST00000652179;ENST00000697167;ENST00000697173;ENST00000697172;ENST00000697176;ENST00000554353…	GO:0000105(histidine biosynthetic process);GO:0000166(nucleotide binding);GO:0001780(neutrophil homeostasis);GO:0001843(neural tube closure);GO:0003824(catalytic activity);GO:0004329(formate-tetrahydrofolate ligase activity);GO:0004477(methenyltetrahydrofolate cyclohydrolase activity);GO:0004486(methylenetetrahydrofolate dehydrogenase [NAD(P)+] activity);GO:0004487(methylenetetrahydrofolate dehyd…	00670(One carbon pool by folate);01100(Metabolic pathways);01240(Biosynthesis of cofactors);01240(Biosynthesis of cofactors)	K00288	EC:1.5.1.5;EC:3.5.4.9;EC:6.3.4.3	NA	methylenetetrahydrofolate dehydrogenase, cyclohydrolase and formyltetrahydrofolate synthetase 1 [Source:HGNC Symbol;Acc:HGNC:7432]	protein_coding;retained_intron;nonsense_mediated_decay;processed_transcript	DOID:0014667(disease_of_metabolism);DOID:0050567(orofacial_cleft);DOID:0050686(organ_system_cancer);DOID:0060083(immune_system_cancer);DOID:0060158(acquired_metabolic_disease);DOID:0080015(physical_disorder);DOID:10652(Alzheimer's_disease);DOID:1089(tethered_spinal_cord_syndrome);DOID:114(heart_disease);DOID:1240(leukemia);DOID:1287(cardiovascular_system_disease);DOID:1289(neurodegenerative_disea…	R-HSA-200644(5,10-methyleneTHF polyglutamate + NADP+ <=> 5,10-methenylTHF polyglutamate + NADPH + H+);R-HSA-200661(MTHFD1 dimer transforms 10-formyl-THFPG to 5,10-methenyl-THFPG);R-HSA-200711(MTHFD1 dimer ligates HCOOH to THFPG to form 10-formyl-THFPG);R-HSA-200718(MTHFD1 dimer dehydrogenates 5,10-methenyl-THFPG to 5,10-methylene-THFPG);R-HSA-200740(5,10-methenylTHF polyglutamate + H2O <=> 10-for…	0.781506	0.84969	1.1048	0.930154	1.37184	1.34876	1.11187	1.61979	2.30773	2.40887	2.08057	1.53982	2.20761	2.56641	0.630983	0.437472	0.672399	0.645117	0.860179	0.305614	0.545087	0.269853	0.458904	0.150229	0.567939	0.709622	0.74953	0.638273	2.90915	1.5406	9.06227e-29	1.26425e-26	up	yes
ENSG00000168078	PBK	55872	ENST00000301905;ENST00000522944	GO:0000165(MAPK cascade);GO:0000166(nucleotide binding);GO:0000278(mitotic cell cycle);GO:0001933(negative regulation of protein phosphorylation);GO:0004672(protein kinase activity);GO:0004674(protein serine/threonine kinase activity);GO:0004708(MAP kinase kinase activity);GO:0004712(protein serine/threonine/tyrosine kinase activity);GO:0004713(protein tyrosine kinase activity);GO:0005515(protein…	NA	K08865	EC:2.7.12.2	NA	PDZ binding kinase [Source:HGNC Symbol;Acc:HGNC:18282]	protein_coding	DOID:0050686(organ_system_cancer);DOID:0050687(cell_type_cancer);DOID:0060058(lymphoma);DOID:0060083(immune_system_cancer);DOID:1240(leukemia);DOID:14566(disease_of_cellular_proliferation);DOID:162(cancer);DOID:1909(melanoma);DOID:2531(hematologic_cancer);DOID:3119(gastrointestinal_system_cancer);DOID:4606(bile_duct_cancer);DOID:4607(biliary_tract_cancer);DOID:4896(bile_duct_adenocarcinoma);DOID:…	NA	1.22749	0.734733	0.626559	0.862903	1.24557	1.05284	0.875167	1.24334	2.07318	2.53499	0.441431	1.94487	2.13854	2.53599	0.177827	0.0421801	0.124608	0.19889	0.0867638	0.175315	0.136149	0.0448136	0.116941	0.0796574	0.169039	0	0.0857612	0.0983653	12.7172	3.66871	9.09705e-29	1.26471e-26	up	yes
ENSG00000269416	LINC01224	104472717	ENST00000596283;ENST00000600643;ENST00000654756;ENST00000593573;ENST00000688559;ENST00000596763;ENST00000684878;ENST00000601338;ENST00000598922;ENST00000594576	NA	NA	NA	NA	NA	long intergenic non-protein coding RNA 1224 [Source:HGNC Symbol;Acc:HGNC:49676]	lncRNA	NA	NA	0.125422	0.256347	0.165649	0.220454	0.212397	0.159203	0.278217	0.174456	0.161669	0.27536	0	0.152036	0.182694	0.191275	0	0	0	0	0	0	0	0	0	0	0	0	0	0	1825.13	10.8338	1.00584e-28	1.39355e-26	up	yes
ENSG00000160741	CRTC2	200186	ENST00000467860;ENST00000487235;ENST00000493909;ENST00000368633;ENST00000461638;ENST00000524997;ENST00000476883;ENST00000492073;ENST00000303569	GO:0003682(chromatin binding);GO:0005515(protein binding);GO:0005634(nucleus);GO:0005654(nucleoplasm);GO:0005737(cytoplasm);GO:0006094(gluconeogenesis);GO:0008140(cAMP response element binding protein binding);GO:0032793(positive regulation of CREB transcription factor activity);GO:0042593(glucose homeostasis);GO:0043970(histone H3-K9 acetylation);GO:0045944(positive regulation of transcription b…	04151(PI3K-Akt signaling pathway);04152(AMPK signaling pathway);04922(Glucagon signaling pathway);04931(Insulin resistance);05166(Human T-cell leukemia virus 1 infection);05166(Human T-cell leukemia virus 1 infection)	NA	NA	NA	CREB regulated transcription coactivator 2 [Source:HGNC Symbol;Acc:HGNC:27301]	retained_intron;protein_coding;nonsense_mediated_decay;processed_transcript	NA	R-HSA-1368140(Expression of PPARGC1A (PGC-1alpha))	14.6025	9.82364	14.8749	10.7297	15.2467	22.8004	21.2358	22.6759	18.3739	16.3612	21.1388	17.9721	20.3412	20.3566	38.2055	22.9313	33.1164	35.1485	31.8717	22.3979	29.8497	23.6498	26.3963	13.9649	31.9282	32.3013	22.8766	41.5273	0.606978	-0.720284	1.0105e-28	1.39519e-26	down	no
ENSG00000120696	KBTBD7	84078	ENST00000379483	GO:0003674(molecular_function);GO:0005515(protein binding);GO:0005634(nucleus);GO:0005737(cytoplasm);GO:0005829(cytosol);GO:0009968(negative regulation of signal transduction);GO:0016567(protein ubiquitination);GO:0031463(Cul3-RING ubiquitin ligase complex);GO:0035020(regulation of Rac protein signal transduction);GO:0043161(proteasome-mediated ubiquitin-dependent protein catabolic process);GO:00…	NA	NA	NA	NA	kelch repeat and BTB domain containing 7 [Source:HGNC Symbol;Acc:HGNC:25266]	protein_coding	NA	R-HSA-5658424(KBTBD7:CUL3:RBX1 ubiquitinates NF1);R-HSA-8952630(NEDD8:AcM-UBE2M binds CRL3 E3 ubiquitin ligase complex);R-HSA-8952631(AcM-UBE2M transfers NEDD8 to CRL3 E3 ubiquitin ligase complex);R-HSA-8955241(CAND1 binds cytosolic CRL E3 ubiquitin ligases);R-HSA-8955289(COMMDs displace CAND1 from cytosolic CRL E3 ubiquitin ligase complexes);R-HSA-8956040(COP9 signalosome deneddylates cytosolic …	3.82881	1.0282	2.04135	1.70081	2.87042	2.31839	2.29256	3.36475	2.21033	1.7588	2.31771	2.70764	5.12402	3.5639	0.950805	0.405692	0.890525	0.981628	0.838327	0.457486	0.71934	0.454179	0.207043	0.098647	0.768902	0.653147	0.463865	0.697372	4.32373	2.11228	1.02094e-28	1.40477e-26	up	yes
ENSG00000102024	PLS3	5358	ENST00000539310;ENST00000355899;ENST00000466150;ENST00000289290;ENST00000481823;ENST00000473026;ENST00000626746	GO:0003779(actin binding);GO:0005509(calcium ion binding);GO:0005515(protein binding);GO:0005737(cytoplasm);GO:0005829(cytosol);GO:0005884(actin filament);GO:0005886(plasma membrane);GO:0032432(actin filament bundle);GO:0046872(metal ion binding);GO:0051015(actin filament binding);GO:0051017(actin filament bundle assembly);GO:0051639(actin filament network formation);GO:0060348(bone development);…	NA	NA	NA	NA	plastin 3 [Source:HGNC Symbol;Acc:HGNC:9091]	protein_coding;retained_intron;nonsense_mediated_decay	DOID:0050686(organ_system_cancer);DOID:0050743(mature_T_cell_and_NK_cell_lymphoma);DOID:0050749(peripheral_T_cell_lymphoma);DOID:0060058(lymphoma);DOID:0060061(cutaneous_T_cell_lymphoma);DOID:0060083(immune_system_cancer);DOID:0080000(muscular_disease);DOID:12377(spinal_muscular_atrophy);DOID:1289(neurodegenerative_disease);DOID:14566(disease_of_cellular_proliferation);DOID:162(cancer);DOID:17(mu…	NA	3.10463	3.35752	2.37094	3.34933	3.34411	3.38198	3.33697	3.28664	3.68085	5.00108	0.168881	4.84702	4.22479	4.57814	0.402399	0.383505	0.490145	0.354434	0.231628	0.193801	0.14773	0.014424	0.188785	0.17399	0.179762	0.133698	0.154187	0.307628	14.312	3.83916	1.03013e-28	1.41258e-26	up	yes
ENSG00000266962	HSD17B1-AS1	108783654	ENST00000590513	NA	NA	NA	NA	NA	HSD17B1 antisense RNA 1 [Source:HGNC Symbol;Acc:HGNC:55314]	lncRNA	NA	NA	2.87692	2.22311	3.48796	2.55202	3.60705	4.32887	4.69882	4.54902	4.76466	4.51517	7.75613	4.70777	6.37986	6.85435	1.34345	0.965663	2.11877	2.11781	2.21552	0.867833	1.85981	1.24984	1.15252	0.42194	2.07574	2.4807	1.76755	2.73958	2.70789	1.43717	1.08945e-28	1.48529e-26	up	yes
ENSG00000173846	PLK3	1263	ENST00000372201;ENST00000492398;ENST00000461769;ENST00000465443;ENST00000493100;ENST00000476731;ENST00000461358	GO:0000082(G1/S transition of mitotic cell cycle);GO:0000086(G2/M transition of mitotic cell cycle);GO:0000122(negative regulation of transcription by RNA polymerase II);GO:0000166(nucleotide binding);GO:0000278(mitotic cell cycle);GO:0000302(response to reactive oxygen species);GO:0000922(spindle pole);GO:0002039(p53 binding);GO:0004672(protein kinase activity);GO:0004674(protein serine/threonin…	04068(FoxO signaling pathway);04625(C-type lectin receptor signaling pathway);05152(Tuberculosis);05152(Tuberculosis)	K08862	EC:2.7.11.21	NA	polo like kinase 3 [Source:HGNC Symbol;Acc:HGNC:2154]	protein_coding;processed_transcript	DOID:14566(disease_of_cellular_proliferation);DOID:162(cancer);DOID:4(disease)	R-HSA-6802170(TP53 stimulates PLK3 expression);R-HSA-6802973(PLK3 phosphorylates CDC25C);R-HSA-6805285(PLK3 phosphorylates TP53)	8.74672	3.42567	4.50349	3.36955	5.10872	14.8276	12.4443	16.187	5.38562	4.51549	3.68141	6.83688	7.01648	5.44645	46.5875	39.0791	35.1847	26.3797	35.8969	38.5049	26.295	22.1344	48.204	8.45554	24.8219	29.9628	22.2722	54.8603	0.221297	-2.17594	1.09055e-28	1.48529e-26	down	yes
ENSG00000179532	DNHD1	144132	ENST00000254579;ENST00000473019;ENST00000526027;ENST00000531903;ENST00000525883;ENST00000530197;ENST00000354685;ENST00000534210;ENST00000524401;ENST00000472080;ENST00000533635;ENST00000529821;ENST00000533649;ENST00000532027;ENST00000525080;ENST00000532467;ENST00000527143	GO:0003341(cilium movement);GO:0005524(ATP binding);GO:0005930(axoneme);GO:0007018(microtubule-based movement);GO:0008569(minus-end-directed microtubule motor activity);GO:0030286(dynein complex);GO:0036156(inner dynein arm);GO:0045505(dynein intermediate chain binding);GO:0051959(dynein light intermediate chain binding);GO:0070062(extracellular exosome);GO:0097729(9+2 motile cilium);GO:0097729(9…	NA	NA	NA	NA	dynein heavy chain domain 1 [Source:HGNC Symbol;Acc:HGNC:26532]	protein_coding;retained_intron;nonsense_mediated_decay	NA	NA	0.344797	0.288179	0.610984	0.244792	0.438343	0.684889	0.498681	1.01244	0.627778	0.652054	0.486421	0.594704	0.550608	0.85527	1.37479	1.17362	1.24764	1.22394	1.91912	0.70018	0.893959	0.645619	0.720278	0.314622	1.06181	1.41978	1.00792	1.37948	0.52311	-0.934813	1.10429e-28	1.49892e-26	down	no
ENSG00000068489	PRR11	55771	ENST00000262293;ENST00000578777;ENST00000582004;ENST00000581182;ENST00000578542;ENST00000577457	GO:0005634(nucleus);GO:0005737(cytoplasm);GO:0016020(membrane);GO:0051726(regulation of cell cycle);GO:0051726(regulation of cell cycle)	NA	NA	NA	NA	proline rich 11 [Source:HGNC Symbol;Acc:HGNC:25619]	protein_coding;retained_intron;nonsense_mediated_decay	NA	NA	0.749429	1.15264	1.33004	1.44903	1.53213	1.53082	1.58958	1.64904	2.34015	2.47968	1.28454	1.83719	2.68297	2.75479	0.275845	0.307476	0.78057	0.629675	0.454308	0.181412	0.344353	0.101632	0.271289	0.139252	0.40766	0.729459	0.574546	0.532363	4.25178	2.08807	1.13498e-28	1.53539e-26	up	yes
ENSG00000280407	ENSG00000280407		ENST00000624920	NA	NA	NA	NA	NA	TEC	TEC	NA	NA	1.68577	1.02581	1.76026	0.930312	0.992996	3.73143	2.22637	2.35457	1.24775	1.36228	1.06621	1.0962	1.64016	1.33365	5.85838	4.52714	5.13438	7.12346	6.89905	4.77877	3.85508	3.23833	4.33667	1.7203	4.96293	8.37913	3.76452	5.90393	0.318574	-1.6503	1.32173e-28	1.78204e-26	down	yes
ENSG00000112079	STK38	11329	ENST00000229812	GO:0000166(nucleotide binding);GO:0000287(magnesium ion binding);GO:0004672(protein kinase activity);GO:0004674(protein serine/threonine kinase activity);GO:0004712(protein serine/threonine/tyrosine kinase activity);GO:0005515(protein binding);GO:0005524(ATP binding);GO:0005634(nucleus);GO:0005737(cytoplasm);GO:0005829(cytosol);GO:0006468(protein phosphorylation);GO:0016301(kinase activity);GO:00…	NA	K08790	EC:2.7.11.1	NA	serine/threonine kinase 38 [Source:HGNC Symbol;Acc:HGNC:17847]	protein_coding	NA	R-HSA-9018778(RHOBTB1 binds interacting proteins at the endosome membrane);R-HSA-9018787(RHOBTB2 binds interacting proteins at the endosome membrane)	20.8609	16.6534	30.3647	20.4128	31.2034	40.8164	31.9988	43.8804	38.5676	24.802	51.8027	31.906	53.3209	46.1072	17.1754	10.9061	21.9769	20.3458	19.5441	10.2116	14.7094	8.21466	11.6531	5.95515	19.9108	17.5224	17.6653	19.8593	2.23834	1.16243	1.33787e-28	1.79775e-26	up	yes
ENSG00000086619	ERO1B	56605	ENST00000264181;ENST00000685201;ENST00000686625;ENST00000688164;ENST00000689343;ENST00000693072;ENST00000691519;ENST00000354619;ENST00000366589;ENST00000687604;ENST00000687487	GO:0005515(protein binding);GO:0005783(endoplasmic reticulum);GO:0005789(endoplasmic reticulum membrane);GO:0006457(protein folding);GO:0015035(protein-disulfide reductase activity);GO:0016020(membrane);GO:0016491(oxidoreductase activity);GO:0016972(thiol oxidase activity);GO:0034975(protein folding in endoplasmic reticulum);GO:0051082(unfolded protein binding);GO:0071949(FAD binding);GO:0071949(…	04141(Protein processing in endoplasmic reticulum);04141(Protein processing in endoplasmic reticulum)	NA	NA	NA	endoplasmic reticulum oxidoreductase 1 beta [Source:HGNC Symbol;Acc:HGNC:14355]	retained_intron;processed_transcript;protein_coding	DOID:4(disease)	R-HSA-264997(Oxidation of cysteine to cystine in Proinsulin)	0.424993	0.346474	0.51407	0.350001	0.481355	0.684522	0.576977	0.80617	0.658995	0.484588	0.661075	0.636365	0.909704	0.702872	1.23388	0.61937	1.01107	1.3736	1.18724	0.638692	1.08524	0.475945	0.486064	0.262874	0.810168	1.21298	0.818206	1.34193	0.656047	-0.608128	1.71414e-28	2.29569e-26	down	no
ENSG00000175063	UBE2C	11065	ENST00000356455;ENST00000405520;ENST00000352551;ENST00000335046;ENST00000496085;ENST00000372568;ENST00000617055;ENST00000243893	GO:0000151(ubiquitin ligase complex);GO:0000166(nucleotide binding);GO:0000209(protein polyubiquitination);GO:0004842(ubiquitin-protein transferase activity);GO:0005515(protein binding);GO:0005524(ATP binding);GO:0005634(nucleus);GO:0005654(nucleoplasm);GO:0005680(anaphase-promoting complex);GO:0005829(cytosol);GO:0005886(plasma membrane);GO:0006511(ubiquitin-dependent protein catabolic process);…	04120(Ubiquitin mediated proteolysis);04120(Ubiquitin mediated proteolysis)	K06688	EC:2.3.2.23	NA	ubiquitin conjugating enzyme E2 C [Source:HGNC Symbol;Acc:HGNC:15937]	protein_coding;processed_transcript	DOID:0050615(respiratory_system_cancer);DOID:0050686(organ_system_cancer);DOID:1324(lung_cancer);DOID:14566(disease_of_cellular_proliferation);DOID:162(cancer);DOID:170(endocrine_gland_cancer);DOID:1781(thyroid_cancer);DOID:3119(gastrointestinal_system_cancer);DOID:3571(liver_cancer);DOID:3905(lung_carcinoma);DOID:3908(non_small_cell_lung_carcinoma);DOID:3963(thyroid_carcinoma);DOID:4(disease);DO…	R-HSA-141423(Binding of the MCC complex to the APC/C complex);R-HSA-174057(Multiubiquitination of APC/C-associated Cdh1);R-HSA-174058(Degradation of multiubiquitinated Cdh1);R-HSA-174070(Association of Cdh1 with the APC/C);R-HSA-174079(Phosphorylation of Cdh1 by Cyclin A:Cdk2);R-HSA-174088(Association of cell cycle proteins with the APC/C:Cdh1 complex);R-HSA-174104(Ubiquitination of Cyclin A by A…	3.43611	3.05286	2.66796	3.14468	2.89409	2.9568	3.09785	3.39835	8.67898	12.3901	1.79156	7.72855	9.30478	11.1105	0.9248	0.90626	0.868642	0.712935	0.392738	0.683639	0.598954	0.353006	0.613797	0.161307	0.687427	0.593618	0.628656	1.0282	8.26452	3.04693	1.78727e-28	2.38567e-26	up	yes
ENSG00000129315	CCNT1	904	ENST00000417344;ENST00000551989;ENST00000618666;ENST00000550457;ENST00000640148;ENST00000261900	GO:0000079(regulation of cyclin-dependent protein serine/threonine kinase activity);GO:0000307(cyclin-dependent protein kinase holoenzyme complex);GO:0000976(transcription cis-regulatory region binding);GO:0003677(DNA binding);GO:0003682(chromatin binding);GO:0005515(protein binding);GO:0005634(nucleus);GO:0005654(nucleoplasm);GO:0005829(cytosol);GO:0006351(DNA-templated transcription);GO:0006357…	05202(Transcriptional misregulation in cancer);05202(Transcriptional misregulation in cancer)	NA	NA	NA	cyclin T1 [Source:HGNC Symbol;Acc:HGNC:1599]	nonsense_mediated_decay;retained_intron;protein_coding	DOID:0050117(disease_by_infectious_agent);DOID:0050177(monogenic_disease);DOID:0050736(autosomal_dominant_disease);DOID:0050739(autosomal_genetic_disease);DOID:2914(immune_system_disease);DOID:4(disease);DOID:526(Human_immunodeficiency_virus_infectious_disease);DOID:5683(hereditary_breast_ovarian_cancer);DOID:612(primary_immunodeficiency_disease);DOID:630(genetic_disease);DOID:643(progressive_mul…	R-HSA-112379(Recruitment of elongation factors to form elongation complex);R-HSA-112381(Hyperphosphorylation (Ser2) of RNA Pol II CTD by P-TEFb complex);R-HSA-112385(Addition of nucleotides leads to transcript elongation);R-HSA-112392(Resumption of elongation after recovery from pausing);R-HSA-112395(Abortive termination of elongation after arrest);R-HSA-112396(Separation of elongating transcript…	2.09792	1.45454	3.16131	1.81032	2.60813	3.98324	2.69098	3.81812	2.99302	3.35111	4.94944	3.44126	5.02983	4.98978	7.24197	5.39035	8.06233	10.1294	9.2146	4.29062	6.1269	3.1216	3.71409	0.96803	6.03084	9.91057	5.70376	7.9935	0.527642	-0.922368	1.92988e-28	2.56751e-26	down	no
ENSG00000171155	C1GALT1C1	29071	ENST00000304661;ENST00000371313	GO:0000139(Golgi membrane);GO:0005515(protein binding);GO:0006493(protein O-linked glycosylation);GO:0016020(membrane);GO:0016021(integral component of membrane);GO:0016263(glycoprotein-N-acetylgalactosamine 3-beta-galactosyltransferase activity);GO:0016267(O-glycan processing, core 1);GO:0030168(platelet activation);GO:0036344(platelet morphogenesis);GO:0070062(extracellular exosome);GO:0070062(…	00512(Mucin type O-glycan biosynthesis);00514(Other types of O-glycan biosynthesis);01100(Metabolic pathways);01100(Metabolic pathways)	NA	NA	NA	C1GALT1 specific chaperone 1 [Source:HGNC Symbol;Acc:HGNC:24338]	protein_coding	DOID:0060056(hypersensitivity_reaction_disease);DOID:14566(disease_of_cellular_proliferation);DOID:162(cancer);DOID:225(syndrome);DOID:2914(immune_system_disease);DOID:417(hypersensitivity_reaction_type_II_disease);DOID:4(disease);DOID:7(disease_of_anatomical_entity)	R-HSA-1964505(C1GALT1 transfers Galactose to the Tn antigen forming Core 1 glycoproteins (T antigens));R-HSA-6785524(Defective C1GALT1C1 does not bind C1GALT1)	2.37991	2.84087	4.18292	3.04578	5.04789	4.78177	4.68999	7.1794	5.67242	6.53311	5.3164	4.31079	7.87703	6.44822	2.41427	1.26124	2.6062	2.46748	2.07975	0.995146	1.37573	0.770023	1.1067	0.437738	2.95659	2.66397	1.65986	2.00743	2.8347	1.50319	2.09745e-28	2.78123e-26	up	yes
ENSG00000137817	PARP6	56965	ENST00000565443;ENST00000566991;ENST00000565999;ENST00000260376;ENST00000569795;ENST00000544520;ENST00000567042;ENST00000616176;ENST00000564610;ENST00000419739;ENST00000569972;ENST00000567633;ENST00000413097;ENST00000566844;ENST00000567974;ENST00000568213;ENST00000566831;ENST00000287196;ENST00000569173	GO:0003950(NAD+ ADP-ribosyltransferase activity);GO:0006471(protein ADP-ribosylation);GO:0016740(transferase activity);GO:0016757(glycosyltransferase activity);GO:0050775(positive regulation of dendrite morphogenesis);GO:0070213(protein auto-ADP-ribosylation);GO:0140289(protein mono-ADP-ribosylation);GO:1990404(NAD+-protein ADP-ribosyltransferase activity);GO:1990404(NAD+-protein ADP-ribosyltrans…	NA	K15258	EC:2.4.2.30	NA	poly(ADP-ribose) polymerase family member 6 [Source:HGNC Symbol;Acc:HGNC:26921]	nonsense_mediated_decay;retained_intron;protein_coding;processed_transcript	NA	R-HSA-8938073(PARPs transfer ADP-D-ribose to proteins (poly(ADP-ribosyl)ation));R-HSA-9686061(Nucleoprotein is ADP-ribosylated);R-HSA-9729279(Nucleoprotein is ADP-ribosylated)	2.17048	1.81285	2.45642	1.8328	2.77602	3.55779	3.35716	4.44578	3.48131	3.15012	4.65538	3.44051	3.98622	4.46062	6.09049	3.68756	5.97608	5.22697	5.82195	3.35175	4.69235	2.94071	5.58464	1.25144	4.80487	5.16872	4.3824	6.52263	0.695903	-0.523041	2.18258e-28	2.8846e-26	down	no
ENSG00000109625	CPZ	8532	ENST00000382480;ENST00000360986;ENST00000315782;ENST00000513486;ENST00000514875;ENST00000515606;ENST00000504070;ENST00000514602;ENST00000506287	GO:0004180(carboxypeptidase activity);GO:0004181(metallocarboxypeptidase activity);GO:0005515(protein binding);GO:0005576(extracellular region);GO:0005615(extracellular space);GO:0006508(proteolysis);GO:0006518(peptide metabolic process);GO:0008233(peptidase activity);GO:0008237(metallopeptidase activity);GO:0008270(zinc ion binding);GO:0016055(Wnt signaling pathway);GO:0016485(protein processing…	NA	NA	NA	NA	carboxypeptidase Z [Source:HGNC Symbol;Acc:HGNC:2333]	protein_coding;retained_intron;nonsense_mediated_decay;processed_transcript	NA	NA	0.43606	0.00777462	0.186609	0.585151	0.427408	0.32528	0.630664	0.507092	0.35264	0.479781	0	0.309778	0.429463	0.421834	0.00128099	0	0	0	0	0	0	0	0	0	0	0	0	0	3980.93	11.9589	2.54869e-28	3.35742e-26	up	yes
ENSG00000289353	ENSG00000289353		ENST00000691717	NA	NA	NA	NA	NA	novel transcript, sense intronic to CMTM1and CKLF-CMTM1	lncRNA	NA	NA	7.54889	6.19755	7.36593	5.26228	6.67268	8.38503	5.67298	10.0118	6.14552	6.91619	8.91683	6.23	11.6915	11.4917	0.410427	0.679602	1.22409	1.93453	1.37796	0.780944	0.496578	0.251247	0.079795	0.371588	2.46328	1.71437	1.14408	1.59978	7.46882	2.90088	2.67213e-28	3.49799e-26	up	yes
ENSG00000108651	UTP6	55813	ENST00000261708;ENST00000583408;ENST00000581012;ENST00000579878;ENST00000477860;ENST00000484661;ENST00000477128;ENST00000579459;ENST00000490218	GO:0000462(maturation of SSU-rRNA from tricistronic rRNA transcript (SSU-rRNA, 5.8S rRNA, LSU-rRNA));GO:0005515(protein binding);GO:0005634(nucleus);GO:0005654(nucleoplasm);GO:0005694(chromosome);GO:0005730(nucleolus);GO:0006364(rRNA processing);GO:0006396(RNA processing);GO:0030515(snoRNA binding);GO:0032040(small-subunit processome);GO:0034388(Pwp2p-containing subcomplex of 90S preribosome);GO:…	03008(Ribosome biogenesis in eukaryotes);03008(Ribosome biogenesis in eukaryotes)	NA	NA	NA	UTP6 small subunit processome component [Source:HGNC Symbol;Acc:HGNC:18279]	protein_coding;retained_intron;processed_transcript	NA	R-HSA-6790906(EMG1 of the SSU processome methylates pseudouridine-1248 of 18S rRNA yielding N(1)-methylpseudouridine-1248);R-HSA-6791221(30S pre-rRNA is nucleolytically processed at site 1 to yield 21S pre-rRNA);R-HSA-6791222(21S pre-rRNA is nucleolytically processed at site E (site2a) to yield 18SE pre-rRNA);R-HSA-6791227(47S pre-rRNA is nucleolytically processed at A' (01,A1), site A0, and site…	2.59577	1.85379	2.66458	2.89525	3.0468	3.57725	3.61299	5.9068	4.99832	4.03103	4.40155	4.32751	6.98352	5.79119	2.49967	1.23119	2.08536	2.69731	2.40838	1.18261	1.84159	0.760519	1.26243	0.542882	1.80025	2.40849	1.56472	2.43583	2.29302	1.19725	2.67282e-28	3.49799e-26	up	yes
ENSG00000136574	GATA4	2626	ENST00000526021;ENST00000622443;ENST00000532059;ENST00000528712;ENST00000335135;ENST00000532977;ENST00000526716;ENST00000526974	GO:0000122(negative regulation of transcription by RNA polymerase II);GO:0000785(chromatin);GO:0000976(transcription cis-regulatory region binding);GO:0000977(RNA polymerase II transcription regulatory region sequence-specific DNA binding);GO:0000978(RNA polymerase II cis-regulatory region sequence-specific DNA binding);GO:0000981(DNA-binding transcription factor activity, RNA polymerase II-speci…	04022(cGMP-PKG signaling pathway);04218(Cellular senescence);04530(Tight junction);04919(Thyroid hormone signaling pathway);04919(Thyroid hormone signaling pathway)	NA	NA	zf-GATA	GATA binding protein 4 [Source:HGNC Symbol;Acc:HGNC:4173]	retained_intron;protein_coding	DOID:114(heart_disease);DOID:1287(cardiovascular_system_disease);DOID:14566(disease_of_cellular_proliferation);DOID:162(cancer);DOID:1657(ventricular_septal_defect);DOID:1681(heart_septal_defect);DOID:1682(congenital_heart_disease);DOID:1882(atrial_heart_septal_defect);DOID:4(disease);DOID:6419(tetralogy_of_Fallot);DOID:7(disease_of_anatomical_entity)	R-HSA-2032800(Expression of NPPA (ANF));R-HSA-400500(Synthesis of prepro-Glucose-dependent Insulinotropic Polypeptide (preproGIP) in intestinal K cells);R-HSA-9690877(Expression of DMRT1 in testis differentiation);R-HSA-9690896(SOX9 and GATA4 bind the DMRT1 gene);R-HSA-9692135(SOX9, NR5A1 (SF1), and GATA4 bind the AMH gene);R-HSA-9692241(Expression of SRY in testis differentiation);R-HSA-9692250(…	0.251547	0.373541	0.143393	0.350378	0.292283	0.283843	0.250455	0.375213	0.249357	0.191579	0.0444639	0.213063	0.381838	0.235712	0	0	0	0.0236244	0	0.0137872	0	0	0	0	0	0	0	0	97.2068	6.60298	2.80143e-28	3.65441e-26	up	yes
ENSG00000251493	FOXD1	2297	ENST00000615637;ENST00000513595	GO:0000785(chromatin);GO:0000978(RNA polymerase II cis-regulatory region sequence-specific DNA binding);GO:0000981(DNA-binding transcription factor activity, RNA polymerase II-specific);GO:0001228(DNA-binding transcription activator activity, RNA polymerase II-specific);GO:0001658(branching involved in ureteric bud morphogenesis);GO:0001822(kidney development);GO:0003677(DNA binding);GO:0003700(D…	NA	NA	NA	Fork_head	forkhead box D1 [Source:HGNC Symbol;Acc:HGNC:3802]	protein_coding;processed_transcript	NA	NA	0.65601	0.470177	0.481298	0.802687	0.533313	0.84402	0.797539	0.724959	0.548053	0.636302	0.172531	0.754329	0.860479	0.628233	0.0594825	0.0122047	0.0548187	0.121134	0.0164802	0.0213235	0.0104174	0.0139744	0.0199126	0.0621349	0.0565485	0.0728954	0.0462101	0.121816	12.9251	3.6921	3.33161e-28	4.33195e-26	up	yes
ENSG00000095002	MSH2	4436	ENST00000406134;ENST00000233146;ENST00000645506;ENST00000646415;ENST00000644092;ENST00000543555	GO:0000166(nucleotide binding);GO:0000287(magnesium ion binding);GO:0000400(four-way junction DNA binding);GO:0000781(chromosome, telomeric region);GO:0001701(in utero embryonic development);GO:0002204(somatic recombination of immunoglobulin genes involved in immune response);GO:0003677(DNA binding);GO:0003682(chromatin binding);GO:0003684(damaged DNA binding);GO:0003690(double-stranded DNA bindi…	01524(Platinum drug resistance);03430(Mismatch repair);05200(Pathways in cancer);05210(Colorectal cancer);05210(Colorectal cancer)	NA	NA	NA	mutS homolog 2 [Source:HGNC Symbol;Acc:HGNC:7325]	protein_coding;nonsense_mediated_decay	DOID:0050615(respiratory_system_cancer);DOID:0050686(organ_system_cancer);DOID:0050687(cell_type_cancer);DOID:0060072(benign_neoplasm);DOID:0060083(immune_system_cancer);DOID:0060084(cell_type_benign_neoplasm);DOID:0060100(musculoskeletal_system_cancer);DOID:0060118(thoracic_disease);DOID:0060122(integumentary_system_cancer);DOID:10155(intestinal_cancer);DOID:10283(prostate_cancer);DOID:10286(pro…	R-HSA-5358510(MSH2:MSH6 recruits MLH1:PMS2 to mismatch and interacts with PCNA);R-HSA-5358512(MLH1:PMS2 makes single strand incision near insertion/deletion loop of 2 bases or more);R-HSA-5358513(MSH2:MSH3 binds insertion/deletion loop of 2 bases or more);R-HSA-5358518(MLH1:PMS2 makes single strand incision near 1-2 base mismatch);R-HSA-5358519(MSH2:MSH3 recruits MLH1:PMS2 to mismatch and interac…	0.382946	0.302954	0.561456	0.476315	0.600707	0.853816	0.510759	1.13869	0.986589	0.896604	0.658561	1.02234	1.45087	1.3238	0.289734	0.213561	0.177944	0.347084	0.412541	0.150799	0.23857	0.183059	0.154164	0.0513516	0.294059	0.275333	0.259543	0.304548	3.33098	1.73595	4.01352e-28	5.20178e-26	up	yes
ENSG00000243667	DNAAF10	116143	ENST00000295121;ENST00000457114;ENST00000406245;ENST00000409164;ENST00000492039;ENST00000468984	GO:0005515(protein binding);GO:0005737(cytoplasm);GO:0006915(apoptotic process);GO:0043130(ubiquitin binding);GO:0050821(protein stabilization);GO:0070286(axonemal dynein complex assembly);GO:0120293(dynein axonemal particle);GO:1990062(RPAP3/R2TP/prefoldin-like complex);GO:1990062(RPAP3/R2TP/prefoldin-like complex)	NA	NA	NA	NA	dynein axonemal assembly factor 10 [Source:HGNC Symbol;Acc:HGNC:25176]	protein_coding;processed_transcript;retained_intron	NA	NA	0.372782	0.350602	0.668493	0.336871	0.720234	0.848376	0.642673	0.901603	0.8842	0.873563	0.848957	0.945565	1.13996	1.25267	0.184691	0.184011	0.182109	0.306555	0.385949	0.190692	0.113395	0.0616703	0.0789146	0.0523444	0.21503	0.357966	0.226582	0.214361	3.9163	1.96949	4.60663e-28	5.94832e-26	up	yes
ENSG00000135318	NT5E	4907	ENST00000257770;ENST00000369651;ENST00000369646;ENST00000416334;ENST00000437581	GO:0000166(nucleotide binding);GO:0005515(protein binding);GO:0005654(nucleoplasm);GO:0005829(cytosol);GO:0005886(plasma membrane);GO:0006196(AMP catabolic process);GO:0006259(DNA metabolic process);GO:0007159(leukocyte cell-cell adhesion);GO:0008252(nucleotidase activity);GO:0008253(5'-nucleotidase activity);GO:0009166(nucleotide catabolic process);GO:0009897(external side of plasma membrane);GO…	00230(Purine metabolism);00240(Pyrimidine metabolism);00760(Nicotinate and nicotinamide metabolism);01100(Metabolic pathways);01100(Metabolic pathways)	K19970	EC:3.1.3.5	NA	5'-nucleotidase ecto [Source:HGNC Symbol;Acc:HGNC:8021]	protein_coding	DOID:0050686(organ_system_cancer);DOID:0050687(cell_type_cancer);DOID:0060083(immune_system_cancer);DOID:1036(chronic_leukemia);DOID:1037(lymphoblastic_leukemia);DOID:1040(chronic_lymphocytic_leukemia);DOID:12337(varicocele);DOID:1240(leukemia);DOID:1287(cardiovascular_system_disease);DOID:14566(disease_of_cellular_proliferation);DOID:162(cancer);DOID:178(vascular_disease);DOID:1909(melanoma);DOI…	R-HSA-109278(NT5E:Zn2+ hydrolyses AMP,dAMP,GMP, IMP);R-HSA-109291(CMP or TMP or UMP + H2O => cytidine, thymidine, or uridine + orthophosphate [NT5E]);R-HSA-8940070(NT5E:Zn2+ hydrolyses NAD+);R-HSA-8940074(NT5E:Zn2+ hydrolyses NMN)	2.90553	2.29156	3.07394	2.93105	2.89055	3.67005	3.43615	3.21013	5.91096	6.76591	1.50789	6.80992	6.60228	6.9342	0.712702	0.688672	1.0681	0.907791	1.91688	0.281919	0.464502	0.222534	0.864416	0.26506	0.815801	0.928326	0.697414	0.794265	5.54555	2.47133	4.61913e-28	5.94832e-26	up	yes
ENSG00000136504	KAT7	11143	ENST00000259021;ENST00000503635;ENST00000510426;ENST00000509794;ENST00000435742;ENST00000513075;ENST00000675278;ENST00000503101;ENST00000509773;ENST00000513980;ENST00000454930;ENST00000424009;ENST00000514540;ENST00000513171;ENST00000510819;ENST00000506533	GO:0000123(histone acetyltransferase complex);GO:0000775(chromosome, centromeric region);GO:0001558(regulation of cell growth);GO:0001779(natural killer cell differentiation);GO:0003688(DNA replication origin binding);GO:0003712(transcription coregulator activity);GO:0004402(histone acetyltransferase activity);GO:0005515(protein binding);GO:0005634(nucleus);GO:0005654(nucleoplasm);GO:0005694(chro…	NA	K11307	EC:2.3.1.48	NA	lysine acetyltransferase 7 [Source:HGNC Symbol;Acc:HGNC:17016]	protein_coding;retained_intron;nonsense_mediated_decay;processed_transcript	DOID:14566(disease_of_cellular_proliferation);DOID:162(cancer);DOID:4(disease)	R-HSA-3318413(KAT7-containing ING4/5 complexes acetylate Me3K-histone H3)	1.88722	1.64299	2.53832	1.63502	2.78146	4.04249	3.28082	3.79059	3.36935	2.9316	5.91068	3.4505	4.62983	4.59922	5.71259	4.84615	7.62075	8.14057	7.62201	3.26274	4.65661	4.0229	3.8667	1.30443	7.83732	8.56202	5.34372	7.59427	0.578287	-0.790143	5.16937e-28	6.63562e-26	down	no
ENSG00000076382	SPAG5	10615	ENST00000321765;ENST00000580406;ENST00000580676;ENST00000577259;ENST00000581133;ENST00000580377;ENST00000578479;ENST00000580682;ENST00000580083;ENST00000580567;ENST00000584206;ENST00000578230;ENST00000378976;ENST00000582076;ENST00000582175;ENST00000536674	GO:0000070(mitotic sister chromatid segregation);GO:0000775(chromosome, centromeric region);GO:0000776(kinetochore);GO:0000922(spindle pole);GO:0005515(protein binding);GO:0005694(chromosome);GO:0005737(cytoplasm);GO:0005815(microtubule organizing center);GO:0005819(spindle);GO:0005829(cytosol);GO:0005856(cytoskeleton);GO:0005874(microtubule);GO:0007049(cell cycle);GO:0007051(spindle organization…	NA	NA	NA	NA	sperm associated antigen 5 [Source:HGNC Symbol;Acc:HGNC:13452]	protein_coding;retained_intron;nonsense_mediated_decay	NA	NA	1.81153	1.35597	1.35221	1.71124	1.85903	1.69259	1.53321	1.96027	2.87796	3.75055	1.04946	2.36531	3.00667	3.55342	0.659693	0.583361	0.555501	0.587818	0.659442	0.445785	0.40592	0.211009	0.580409	0.168739	0.442941	0.6249	0.486666	0.547966	4.29293	2.10196	5.29779e-28	6.77881e-26	up	yes
ENSG00000024526	DEPDC1	55635	ENST00000488146;ENST00000370966;ENST00000456315;ENST00000525124	GO:0005096(GTPase activator activity);GO:0005515(protein binding);GO:0005634(nucleus);GO:0007165(signal transduction);GO:0017053(transcription repressor complex);GO:0035556(intracellular signal transduction);GO:0045892(negative regulation of DNA-templated transcription);GO:0050790(regulation of catalytic activity);GO:0050790(regulation of catalytic activity)	NA	NA	NA	NA	DEP domain containing 1 [Source:HGNC Symbol;Acc:HGNC:22949]	retained_intron;protein_coding	NA	NA	0.295811	0.294312	0.292139	0.277523	0.3003	0.453483	0.260863	0.563471	0.876366	1.12286	0.198807	0.826187	0.970674	0.904827	0.0201773	0.0284552	0	0.0463689	0.0216501	0.0273306	0.0500766	0	0	0.0228268	0.055495	0.04643	0.0209546	0.0175601	21.3744	4.41781	5.48517e-28	6.99629e-26	up	yes
ENSG00000164741	DLC1	10395,8655,9940	ENST00000276297;ENST00000358919;ENST00000512044;ENST00000521730;ENST00000510250;ENST00000517868	GO:0001843(neural tube closure);GO:0003007(heart morphogenesis);GO:0005096(GTPase activator activity);GO:0005515(protein binding);GO:0005634(nucleus);GO:0005737(cytoplasm);GO:0005829(cytosol);GO:0005901(caveola);GO:0005925(focal adhesion);GO:0006915(apoptotic process);GO:0006919(activation of cysteine-type endopeptidase activity involved in apoptotic process);GO:0007165(signal transduction);GO:00…	NA	NA	NA	NA	DLC1 Rho GTPase activating protein [Source:HGNC Symbol;Acc:HGNC:2897]	protein_coding;retained_intron	DOID:0050117(disease_by_infectious_agent);DOID:0050615(respiratory_system_cancer);DOID:0050686(organ_system_cancer);DOID:0060058(lymphoma);DOID:0060083(immune_system_cancer);DOID:10155(intestinal_cancer);DOID:10283(prostate_cancer);DOID:10286(prostate_carcinoma);DOID:10534(stomach_cancer);DOID:1324(lung_cancer);DOID:14566(disease_of_cellular_proliferation);DOID:162(cancer);DOID:193(reproductive_o…	R-HSA-8981637(RHOA GAPs stimulate RHOA GTPase activity);R-HSA-9013022(RHOB GAPs stimulate RHOB GTPase activity);R-HSA-9013111(RHOC GAPs stimulate RHOC GTPase activity);R-HSA-9013144(RAC1 GAPs stimulate RAC1 GTPase activity);R-HSA-9013161(CDC42 GAPs stimulate CDC42 GTPase activity);R-HSA-9018745(RHOQ GAPs stimulate RHOQ GTPase activity)	0.341825	0.336299	0.288128	0.337613	0.33697	0.375117	0.367959	0.318627	0.355811	0.440022	0.0467165	0.425018	0.445807	0.494546	0.0253716	0.0169739	0.0199482	0.0560527	0.04422	0.0325188	0.0132986	0.00692015	0	0	0.050066	0.0462004	0.0205832	0.0558485	12.6558	3.66172	5.81879e-28	7.39834e-26	up	yes
ENSG00000117399	CDC20	991	ENST00000310955;ENST00000372462;ENST00000482046;ENST00000478882	GO:0000922(spindle pole);GO:0005515(protein binding);GO:0005654(nucleoplasm);GO:0005680(anaphase-promoting complex);GO:0005737(cytoplasm);GO:0005813(centrosome);GO:0005815(microtubule organizing center);GO:0005819(spindle);GO:0005829(cytosol);GO:0005856(cytoskeleton);GO:0007049(cell cycle);GO:0007064(mitotic sister chromatid cohesion);GO:0007094(mitotic spindle assembly checkpoint signaling);GO:0…	04110(Cell cycle);04114(Oocyte meiosis);04120(Ubiquitin mediated proteolysis);05166(Human T-cell leukemia virus 1 infection);05203(Viral carcinogenesis);05203(Viral carcinogenesis)	NA	NA	NA	cell division cycle 20 [Source:HGNC Symbol;Acc:HGNC:1723]	protein_coding;processed_transcript	DOID:0050686(organ_system_cancer);DOID:0060083(immune_system_cancer);DOID:1240(leukemia);DOID:14566(disease_of_cellular_proliferation);DOID:162(cancer);DOID:2531(hematologic_cancer);DOID:4(disease)	R-HSA-141409(Mad1 binds kinetochore);R-HSA-141422(MAD2 converted to an inhibitory state via interaction with Mad1);R-HSA-141423(Binding of the MCC complex to the APC/C complex);R-HSA-141429(Inactivation of APC/C via CDC20 sequestration);R-HSA-141431(MAD2 associates with the Mad1 kinetochore complex);R-HSA-141437(Formation of the MCC complex);R-HSA-141439(Release of activated MAD2 from kinetochore…	2.72712	2.79578	3.03822	2.36558	4.65824	2.7808	1.82708	3.14253	9.50955	17.543	4.61752	8.68215	9.4735	12.0221	0.702961	0.553402	0.722653	0.693643	0.798801	0.941753	0.481721	0.143627	0.665304	0.264254	0.824938	0.641944	0.58129	0.588862	9.8991	3.3073	6.04632e-28	7.66338e-26	up	yes
ENSG00000130803	ZNF317	57693	ENST00000590152;ENST00000419608;ENST00000591278;ENST00000360385;ENST00000247956;ENST00000591508	GO:0000978(RNA polymerase II cis-regulatory region sequence-specific DNA binding);GO:0000981(DNA-binding transcription factor activity, RNA polymerase II-specific);GO:0003677(DNA binding);GO:0005515(protein binding);GO:0005634(nucleus);GO:0006355(regulation of DNA-templated transcription);GO:0006357(regulation of transcription by RNA polymerase II);GO:0046872(metal ion binding);GO:0046872(metal i…	05168(Herpes simplex virus 1 infection);05168(Herpes simplex virus 1 infection)	NA	NA	zf-C2H2	zinc finger protein 317 [Source:HGNC Symbol;Acc:HGNC:13507]	retained_intron;nonsense_mediated_decay;protein_coding	NA	R-HSA-975040(KRAB-ZNF / KAP Interaction)	2.52255	2.37114	3.64621	2.41462	4.25845	4.73738	4.87547	5.30967	5.77489	5.00948	7.80439	5.05076	6.33921	6.41454	8.44531	5.68594	8.68262	8.63104	9.75579	4.60628	7.6779	4.61895	5.63997	1.55531	7.47499	9.14905	7.60962	9.21173	0.673746	-0.569722	6.80349e-28	8.59593e-26	down	no
ENSG00000138675	FGF5	2250	ENST00000456523;ENST00000312465;ENST00000503413;ENST00000380628	GO:0001934(positive regulation of protein phosphorylation);GO:0005104(fibroblast growth factor receptor binding);GO:0005576(extracellular region);GO:0005615(extracellular space);GO:0005737(cytoplasm);GO:0007267(cell-cell signaling);GO:0007399(nervous system development);GO:0008083(growth factor activity);GO:0008284(positive regulation of cell population proliferation);GO:0008543(fibroblast growth…	04010(MAPK signaling pathway);04014(Ras signaling pathway);04015(Rap1 signaling pathway);04020(Calcium signaling pathway);04151(PI3K-Akt signaling pathway);04810(Regulation of actin cytoskeleton);05200(Pathways in cancer);05218(Melanoma);05224(Breast cancer);05226(Gastric cancer);05226(Gastric cancer)	NA	NA	NA	fibroblast growth factor 5 [Source:HGNC Symbol;Acc:HGNC:3683]	protein_coding;processed_transcript	DOID:0050828(artery_disease);DOID:10763(hypertension);DOID:1287(cardiovascular_system_disease);DOID:178(vascular_disease);DOID:4(disease);DOID:7(disease_of_anatomical_entity)	R-HSA-109699(PI3K-containing complexes phosphorylate PIP2 to PIP3);R-HSA-1839094(Activated FGFR1 mutants and fusions bind PLCG1);R-HSA-1839098(Activated FGFR1 mutants and fusions phosphorylate PLCG1);R-HSA-1839100(p-4Y- PLCG1 dissociates from activated FGFR1 mutants and fusions);R-HSA-190256(FGFR1c binds to FGF);R-HSA-190258(FGFR2c binds to FGF);R-HSA-190261(FGFR3c binds to FGF);R-HSA-190388(Auto…	0.0936553	0.114641	0.119024	0.121276	0.0589717	0.115231	0.222102	0.0719458	0.101172	0.111389	0	0.163896	0.186489	0.189723	0	0	0	0	0	0	0	0	0	0	0	0	0	0	1192.51	10.2198	7.29529e-28	9.18841e-26	up	yes
ENSG00000198056	PRIM1	5557	ENST00000672280;ENST00000338193;ENST00000550770;ENST00000550224;ENST00000548173;ENST00000552590;ENST00000549549;ENST00000552408;ENST00000546761	GO:0000287(magnesium ion binding);GO:0000428(DNA-directed RNA polymerase complex);GO:0003896(DNA primase activity);GO:0005515(protein binding);GO:0005654(nucleoplasm);GO:0005658(alpha DNA polymerase:primase complex);GO:0006260(DNA replication);GO:0006261(DNA-templated DNA replication);GO:0006269(DNA replication, synthesis of RNA primer);GO:0006270(DNA replication initiation);GO:0008270(zinc ion b…	03030(DNA replication);03030(DNA replication)	K02684	EC:2.7.7.102	NA	DNA primase subunit 1 [Source:HGNC Symbol;Acc:HGNC:9369]	protein_coding;retained_intron;nonsense_mediated_decay;processed_transcript	NA	R-HSA-113504(Detection of damage during initiation of DNA synthesis in S-phase);R-HSA-174425(The primase component of DNA polymerase:primase synthesizes a 6-10 nucleotide RNA primer on the G strand of the telomere);R-HSA-174427(The polymerase component of DNA polymerase alpha:primase synthesizes a 20-nucleotide primer on the G strand of the telomere);R-HSA-174452(RFC binding displaces Pol Alpha o…	0.981232	0.662318	1.25363	1.09791	0.977172	1.43092	1.56127	1.78169	2.03256	1.56235	1.70456	1.73985	2.90706	2.75814	0.745545	0.17762	0.717564	0.803084	0.70997	0.307674	0.566435	0.284656	0.24167	0.114897	0.484115	0.579468	0.539505	0.741124	3.20114	1.67859	7.35844e-28	9.23898e-26	up	yes
ENSG00000261526	ENSG00000261526		ENST00000565797	NA	NA	NA	NA	NA	novel transcript	lncRNA	NA	NA	1.9387	0.68682	1.63818	1.36146	1.21315	2.90635	3.50316	4.35818	1.67481	1.35042	1.52612	1.77921	2.54035	2.38303	6.06661	5.9681	6.56019	8.55198	6.78474	7.81791	5.69732	4.76917	11.6788	2.53605	5.40274	7.93322	4.66114	10.6014	0.303695	-1.71931	7.66495e-28	9.56728e-26	down	yes
ENSG00000121671	CRY2	1408	ENST00000488962;ENST00000443527;ENST00000525110;ENST00000496667;ENST00000616623;ENST00000616080;ENST00000417225;ENST00000495237;ENST00000496571;ENST00000532390;ENST00000533779	GO:0000122(negative regulation of transcription by RNA polymerase II);GO:0000166(nucleotide binding);GO:0000976(transcription cis-regulatory region binding);GO:0003677(DNA binding);GO:0003684(damaged DNA binding);GO:0003697(single-stranded DNA binding);GO:0005515(protein binding);GO:0005576(extracellular region);GO:0005634(nucleus);GO:0005737(cytoplasm);GO:0005739(mitochondrion);GO:0005829(cytoso…	04710(Circadian rhythm);04710(Circadian rhythm)	NA	NA	NA	cryptochrome circadian regulator 2 [Source:HGNC Symbol;Acc:HGNC:2385]	retained_intron;protein_coding;processed_transcript	DOID:14566(disease_of_cellular_proliferation);DOID:150(disease_of_mental_health);DOID:1561(cognitive_disorder);DOID:162(cancer);DOID:3312(bipolar_disorder);DOID:3324(mood_disorder);DOID:4(disease)	R-HSA-1856948(Formation of CRY:PER:Kinase complex);R-HSA-400256(CRY:PER heterodimer binds the BMAL1:CLOCK/NPAS2 heterodimer);R-HSA-400272(FBXL3 binds phosphorylated CRY proteins);R-HSA-400282(CRY proteins are ubiquitinylated);R-HSA-400382(CSNK1E,CSNK1D phosphorylate CRY and PER proteins);R-HSA-549355(CRY proteins stabilize unphosphorylated BMAL1:CLOCK,NPAS2);R-HSA-549385(CRY:PER:Kinase complex tr…	2.31887	1.42317	2.15304	1.52311	2.91629	2.64142	2.83757	3.19068	3.47392	3.62467	4.79533	3.59042	3.79946	3.78424	5.33202	4.47748	4.9959	6.56988	6.78585	3.82468	5.4013	3.93609	5.16858	1.30503	5.03196	5.6268	4.95837	6.09247	0.6053	-0.724279	7.66754e-28	9.56728e-26	down	no
ENSG00000147383	NSDHL	50814	ENST00000370274;ENST00000432467;ENST00000440023	GO:0000252(C-3 sterol dehydrogenase (C-4 sterol decarboxylase) activity);GO:0001942(hair follicle development);GO:0003854(3-beta-hydroxy-delta5-steroid dehydrogenase activity);GO:0005515(protein binding);GO:0005783(endoplasmic reticulum);GO:0005789(endoplasmic reticulum membrane);GO:0005811(lipid droplet);GO:0006629(lipid metabolic process);GO:0006694(steroid biosynthetic process);GO:0006695(chol…	00100(Steroid biosynthesis);01100(Metabolic pathways);01100(Metabolic pathways)	K07748	EC:1.1.1.170	NA	NAD(P) dependent steroid dehydrogenase-like [Source:HGNC Symbol;Acc:HGNC:13398]	protein_coding	DOID:0060037(developmental_disorder_of_mental_health);DOID:0060038(specific_developmental_disorder);DOID:1059(intellectual_disability);DOID:150(disease_of_mental_health);DOID:225(syndrome);DOID:4(disease)	R-HSA-194642(4-methyl,4-carboxycholesta-8(9),24-dien-3beta-ol is decarboxylated and oxidized to form 4-methylcholesta-8(9),24-dien-3-one);R-HSA-194718(4-carboxycholesta-8(9),24-dien-3beta-ol is decarboxylated and oxidized to form cholesta-8(9),24-dien-3-one (zymosterone))	2.14455	2.63271	2.65991	3.41683	3.26601	4.11113	3.32339	3.48841	4.21913	4.66576	4.73402	4.22295	4.58561	4.68402	1.2788	0.961892	1.31448	1.45612	1.67649	0.60472	1.41924	0.635476	1.23714	0.642925	1.68151	1.36885	1.18281	1.96836	2.99243	1.58132	8.08314e-28	1.00546e-25	up	yes
ENSG00000147439	BIN3	55909	ENST00000519863;ENST00000520489;ENST00000518366;ENST00000521140;ENST00000522687;ENST00000276416;ENST00000520292;ENST00000399977;ENST00000519335;ENST00000522268;ENST00000519513	GO:0000917(division septum assembly);GO:0005515(protein binding);GO:0005737(cytoplasm);GO:0005856(cytoskeleton);GO:0006897(endocytosis);GO:0007015(actin filament organization);GO:0007049(cell cycle);GO:0008093(cytoskeletal anchor activity);GO:0008104(protein localization);GO:0008289(lipid binding);GO:0009826(unidimensional cell growth);GO:0010591(regulation of lamellipodium assembly);GO:0014839(m…	NA	NA	NA	NA	bridging integrator 3 [Source:HGNC Symbol;Acc:HGNC:1054]	processed_transcript;retained_intron;nonsense_mediated_decay;protein_coding	NA	NA	4.10874	2.92694	4.05604	3.01227	4.04826	5.12972	6.00711	5.82354	5.4216	3.39822	4.91469	4.15401	5.75213	5.44602	9.01475	7.09282	11.7058	9.62086	9.49747	7.16471	6.73642	6.95062	9.63794	3.32438	8.27762	8.09443	7.73669	13.022	0.544631	-0.876648	8.95605e-28	1.11061e-25	down	no
ENSG00000105088	OLFM2	93145	ENST00000590841;ENST00000593091;ENST00000590410;ENST00000592448	GO:0005515(protein binding);GO:0005576(extracellular region);GO:0005615(extracellular space);GO:0005634(nucleus);GO:0005654(nucleoplasm);GO:0005737(cytoplasm);GO:0007165(signal transduction);GO:0009306(protein secretion);GO:0016020(membrane);GO:0030054(cell junction);GO:0032281(AMPA glutamate receptor complex);GO:0045202(synapse);GO:0051152(positive regulation of smooth muscle cell differentiatio…	NA	NA	NA	NA	olfactomedin 2 [Source:HGNC Symbol;Acc:HGNC:17189]	protein_coding;retained_intron;nonsense_mediated_decay	NA	NA	1.43292	0.946849	1.07107	0.806474	1.00816	1.23714	0.907605	1.05324	1.63835	2.43995	3.91612	2.31913	2.4691	2.44485	0.210512	0.28076	0.417261	0.27912	0.38774	0.160572	0.410499	0.284513	0.247545	0.121106	0.166845	0.179476	0.25914	0.329081	6.34437	2.66548	8.99478e-28	1.11198e-25	up	yes
ENSG00000170236	USP50	373509	ENST00000560380;ENST00000673693;ENST00000616326;ENST00000530218;ENST00000560159;ENST00000532404;ENST00000673660;ENST00000529349	GO:0004843(cysteine-type deubiquitinase activity);GO:0005829(cytosol);GO:0006511(ubiquitin-dependent protein catabolic process);GO:0007032(endosome organization);GO:0007265(Ras protein signal transduction);GO:0014069(postsynaptic density);GO:0016579(protein deubiquitination);GO:0019783(ubiquitin-like protein peptidase activity);GO:0019897(extrinsic component of plasma membrane);GO:0030496(midbody…	NA	NA	NA	NA	ubiquitin specific peptidase 50 [Source:HGNC Symbol;Acc:HGNC:20079]	processed_transcript;protein_coding;nonsense_mediated_decay	NA	NA	0.143857	0.0464156	0.168838	0.0911241	0.102624	0.470026	0.301929	0.490942	0.131018	0.118644	0.0716367	0.0659267	0.196668	0.131071	2.12922	0.788408	1.57728	1.677	1.43378	1.07191	1.46747	0.384	0.354612	0.170775	0.984981	1.96041	0.803053	1.95704	0.150998	-2.7274	9.32344e-28	1.14907e-25	down	yes
ENSG00000116005	PCYOX1	51449	ENST00000433351;ENST00000414812;ENST00000480949;ENST00000451279	GO:0001735(prenylcysteine oxidase activity);GO:0005515(protein binding);GO:0005764(lysosome);GO:0005886(plasma membrane);GO:0016491(oxidoreductase activity);GO:0016670(oxidoreductase activity, acting on a sulfur group of donors, oxygen as acceptor);GO:0030327(prenylated protein catabolic process);GO:0030328(prenylcysteine catabolic process);GO:0034361(very-low-density lipoprotein particle);GO:007…	00900(Terpenoid backbone biosynthesis);00900(Terpenoid backbone biosynthesis)	K05906	EC:1.8.3.5;EC:1.8.3.6	NA	prenylcysteine oxidase 1 [Source:HGNC Symbol;Acc:HGNC:20588]	protein_coding;retained_intron	NA	NA	1.42971	1.06161	2.20088	1.57411	2.30433	3.04958	2.36286	3.10125	2.55655	2.8414	3.34303	3.01497	4.29664	4.31473	1.58027	0.87903	1.35412	1.37589	1.73871	0.623466	1.17351	0.637565	0.551189	0.300094	1.34708	1.33223	1.15141	1.48213	2.41208	1.27028	9.37377e-28	1.15174e-25	up	yes
ENSG00000255717	SNHG1	23642	ENST00000661616;ENST00000671236;ENST00000663237;ENST00000668048;ENST00000670469;ENST00000655919;ENST00000686500;ENST00000665512;ENST00000660730;ENST00000661936;ENST00000541578;ENST00000537965;ENST00000535689;ENST00000544550;ENST00000662229;ENST00000668309;ENST00000665371;ENST00000545440;ENST00000540865;ENST00000670729;ENST00000689664;ENST00000541416;ENST00000658540;ENST00000692887;ENST00000656268…	GO:0005730(nucleolus);GO:0006396(RNA processing);GO:0006396(RNA processing)	NA	NA	NA	NA	small nucleolar RNA host gene 1 [Source:HGNC Symbol;Acc:HGNC:32688]	retained_intron;lncRNA	NA	NA	3.98236	2.81501	5.09262	2.97578	4.20333	4.38181	5.77811	7.06665	7.84634	6.84285	5.48096	6.68808	6.97082	7.78367	16.2154	11.0916	9.86809	13.1719	16.2196	11.2619	9.62213	7.48031	10.3563	2.91707	8.43141	13.1872	7.03028	16.7958	0.507055	-0.979787	1.02536e-27	1.25601e-25	down	no
ENSG00000254685	FPGT	8790	ENST00000370898;ENST00000370894;ENST00000467578;ENST00000472069;ENST00000482102;ENST00000524915;ENST00000534056	GO:0000166(nucleotide binding);GO:0003824(catalytic activity);GO:0005525(GTP binding);GO:0005737(cytoplasm);GO:0005829(cytosol);GO:0006004(fucose metabolic process);GO:0016740(transferase activity);GO:0016772(transferase activity, transferring phosphorus-containing groups);GO:0016779(nucleotidyltransferase activity);GO:0042354(L-fucose metabolic process);GO:0047341(fucose-1-phosphate guanylyltran…	00051(Fructose and mannose metabolism);00520(Amino sugar and nucleotide sugar metabolism);01100(Metabolic pathways);01100(Metabolic pathways)	K00976	EC:2.7.7.30	NA	fucose-1-phosphate guanylyltransferase [Source:HGNC Symbol;Acc:HGNC:3825]	protein_coding;processed_transcript	NA	R-HSA-6787533(FPGT transfers guanylyl group from GTP to Fuc1P to form GDP-Fuc)	0.834945	0.734139	1.58304	1.02606	1.34271	1.38754	1.09979	1.82599	1.39595	1.15885	1.51955	1.26712	2.3414	1.72199	0.292718	0.207266	0.603333	0.567704	0.388973	0.111516	0.312016	0.0689106	0.126021	0.137578	0.418042	0.447086	0.467845	0.552564	4.09205	2.03282	1.17962e-27	1.44057e-25	up	yes
ENSG00000137812	KNL1	57082	ENST00000346991;ENST00000532347;ENST00000528967;ENST00000533001	GO:0000775(chromosome, centromeric region);GO:0000776(kinetochore);GO:0001669(acrosomal vesicle);GO:0001675(acrosome assembly);GO:0005515(protein binding);GO:0005634(nucleus);GO:0005654(nucleoplasm);GO:0005694(chromosome);GO:0005829(cytosol);GO:0007049(cell cycle);GO:0007059(chromosome segregation);GO:0008608(attachment of spindle microtubules to kinetochore);GO:0016604(nuclear body);GO:0031617(N…	NA	NA	NA	NA	kinetochore scaffold 1 [Source:HGNC Symbol;Acc:HGNC:24054]	protein_coding;retained_intron	DOID:0050615(respiratory_system_cancer);DOID:0050686(organ_system_cancer);DOID:0050687(cell_type_cancer);DOID:1324(lung_cancer);DOID:14566(disease_of_cellular_proliferation);DOID:15(reproductive_system_disease);DOID:162(cancer);DOID:1909(melanoma);DOID:2994(germ_cell_cancer);DOID:4766(embryoma);DOID:4(disease);DOID:5223(infertility);DOID:688(embryonal_cancer);DOID:7(disease_of_anatomical_entity)	R-HSA-141409(Mad1 binds kinetochore);R-HSA-141422(MAD2 converted to an inhibitory state via interaction with Mad1);R-HSA-141431(MAD2 associates with the Mad1 kinetochore complex);R-HSA-141439(Release of activated MAD2 from kinetochores);R-HSA-1638803(Phosphorylation of cohesin by PLK1 at centromeres);R-HSA-1638821(PP2A-B56 dephosphorylates centromeric cohesin);R-HSA-2467809(ESPL1 (Separase) cleav…	0.209547	0.192504	0.28713	0.252508	0.431421	0.281405	0.266825	0.32982	0.630643	0.829099	0.372687	0.56143	0.842745	0.807021	0.162313	0.0400938	0.100123	0.106155	0.0749263	0.07039	0.133889	0.0276328	0.0659785	0.0309119	0.071661	0.100862	0.0903915	0.103755	5.33871	2.41649	1.24454e-27	1.51525e-25	up	yes
ENSG00000087586	AURKA	6790	ENST00000312783;ENST00000456249;ENST00000395915;ENST00000395913;ENST00000422322;ENST00000420474;ENST00000441357;ENST00000395914;ENST00000395907;ENST00000347343;ENST00000395911;ENST00000371356;ENST00000451915	GO:0000086(G2/M transition of mitotic cell cycle);GO:0000166(nucleotide binding);GO:0000212(meiotic spindle organization);GO:0000226(microtubule cytoskeleton organization);GO:0000278(mitotic cell cycle);GO:0000922(spindle pole);GO:0004672(protein kinase activity);GO:0004674(protein serine/threonine kinase activity);GO:0004712(protein serine/threonine/tyrosine kinase activity);GO:0005515(protein b…	04114(Oocyte meiosis);04914(Progesterone-mediated oocyte maturation);04914(Progesterone-mediated oocyte maturation)	K11481	EC:2.7.11.1	NA	aurora kinase A [Source:HGNC Symbol;Acc:HGNC:11393]	protein_coding	DOID:0050177(monogenic_disease);DOID:0050686(organ_system_cancer);DOID:0050687(cell_type_cancer);DOID:0050736(autosomal_dominant_disease);DOID:0050739(autosomal_genetic_disease);DOID:0060083(immune_system_cancer);DOID:0070004(myeloma);DOID:1036(chronic_leukemia);DOID:1037(lymphoblastic_leukemia);DOID:1040(chronic_lymphocytic_leukemia);DOID:11054(urinary_bladder_cancer);DOID:1115(sarcoma);DOID:119…	R-HSA-174088(Association of cell cycle proteins with the APC/C:Cdh1 complex);R-HSA-174105(Degradation of multiubiquitinated cell cycle proteins);R-HSA-174195(Ubiquitination of cell cycle proteins targeted by the APC/C:Cdh1complex);R-HSA-2574840(AJUBA facilitates AURKA autophosphorylation);R-HSA-2574845(AJUBA binds centrosome-associated AURKA);R-HSA-3000310(AURKA phosphorylates PLK1);R-HSA-3000319…	1.46684	1.72788	1.49793	1.95199	2.39419	1.9569	1.43902	1.81764	4.93103	6.66229	0.900952	4.79607	5.30644	5.10658	0.208755	0.149931	0.45919	0.384193	0.316934	0.34196	0.324251	0.227762	0.400195	0.254818	0.349411	0.26851	0.406301	0.360099	9.42337	3.23624	1.49199e-27	1.81103e-25	up	yes
ENSG00000187808	SOWAHD	347454	ENST00000343905	GO:0005515(protein binding)	NA	NA	NA	NA	sosondowah ankyrin repeat domain family member D [Source:HGNC Symbol;Acc:HGNC:32960]	protein_coding	NA	NA	5.06543	5.6277	6.17442	5.95276	6.32513	3.09149	5.94549	6.06629	8.90004	4.22693	7.64656	6.46785	6.20109	6.66203	1.4035	1.03787	1.35089	1.78329	1.18506	0.401055	1.70064	0.401895	0.640502	0.777229	1.72482	1.22337	1.40131	1.86875	4.99126	2.3194	1.53922e-27	1.86219e-25	up	yes
ENSG00000117054	ACADM	34	ENST00000681430;ENST00000370841;ENST00000420607;ENST00000680582;ENST00000680964;ENST00000680166;ENST00000529059;ENST00000680805;ENST00000526196;ENST00000679509;ENST00000681278;ENST00000680613;ENST00000681037;ENST00000681548;ENST00000680691;ENST00000681730;ENST00000680844;ENST00000681930;ENST00000473018;ENST00000532207;ENST00000681913;ENST00000680315;ENST00000681837;ENST00000681446;ENST00000681680…	GO:0001889(liver development);GO:0003995(acyl-CoA dehydrogenase activity);GO:0005634(nucleus);GO:0005739(mitochondrion);GO:0005759(mitochondrial matrix);GO:0005978(glycogen biosynthetic process);GO:0006082(organic acid metabolic process);GO:0006111(regulation of gluconeogenesis);GO:0006629(lipid metabolic process);GO:0006631(fatty acid metabolic process);GO:0006635(fatty acid beta-oxidation);GO:0…	00071(Fatty acid degradation);00280(Valine, leucine and isoleucine degradation);01100(Metabolic pathways);01212(Fatty acid metabolism);03320(PPAR signaling pathway);03320(PPAR signaling pathway)	K00249	EC:1.3.8.7	NA	acyl-CoA dehydrogenase medium chain [Source:HGNC Symbol;Acc:HGNC:89]	nonsense_mediated_decay;protein_coding;retained_intron	DOID:4(disease)	R-HSA-109341(dehydrogenation of 4-cis-decenoyl-CoA to form 2-trans-4-cis-decadienoyl-CoA);R-HSA-1989745(Expression of ACADM);R-HSA-77338(Octanoyl-CoA+FAD<=>trans-Oct-2-enoyl-CoA+FADH2);R-HSA-77345(Decanoyl-CoA+FAD<=>trans-Dec-2-enoyl-CoA+FADH2)	0.429573	0.454428	0.816353	0.5639	0.997641	1.0067	0.792192	1.29413	1.06829	1.46654	1.24738	0.9077	1.80154	1.72558	0.39982	0.256991	0.551392	0.523812	0.549393	0.221224	0.308146	0.125563	0.285402	0.1029	0.420395	0.479521	0.31711	0.509234	2.88502	1.52858	1.5434e-27	1.86219e-25	up	yes
ENSG00000188997	KCTD21	283219	ENST00000340067;ENST00000528776;ENST00000526208;ENST00000525447;ENST00000529350;ENST00000530018	GO:0005515(protein binding);GO:0006511(ubiquitin-dependent protein catabolic process);GO:0016567(protein ubiquitination);GO:0040008(regulation of growth);GO:0042802(identical protein binding);GO:0042826(histone deacetylase binding);GO:0045879(negative regulation of smoothened signaling pathway);GO:0051260(protein homooligomerization);GO:0097602(cullin family protein binding);GO:0097602(cullin fam…	NA	NA	NA	NA	potassium channel tetramerization domain containing 21 [Source:HGNC Symbol;Acc:HGNC:27452]	protein_coding	NA	NA	2.30873	1.4039	2.14033	1.79856	2.72318	2.80549	3.28411	4.19305	3.47193	2.80777	4.57703	3.12623	3.72734	4.85237	0.943289	0.515801	0.815887	0.74489	0.937143	0.313254	0.736079	0.290641	0.846621	0.134042	0.89761	0.103026	0.747902	0.952906	4.81341	2.26706	1.86288e-27	2.24092e-25	up	yes
ENSG00000171307	ZDHHC16	84287	ENST00000414567;ENST00000370854;ENST00000370846;ENST00000393760;ENST00000492733;ENST00000352634;ENST00000420089;ENST00000417044;ENST00000495735;ENST00000487315;ENST00000353979;ENST00000370842;ENST00000462924;ENST00000492610;ENST00000345745;ENST00000459777;ENST00000466895	GO:0001654(eye development);GO:0005515(protein binding);GO:0005783(endoplasmic reticulum);GO:0005789(endoplasmic reticulum membrane);GO:0005794(Golgi apparatus);GO:0006915(apoptotic process);GO:0006974(cellular response to DNA damage stimulus);GO:0007507(heart development);GO:0016020(membrane);GO:0016021(integral component of membrane);GO:0016409(palmitoyltransferase activity);GO:0016740(transfer…	NA	K18932	EC:2.3.1.225	NA	zinc finger DHHC-type palmitoyltransferase 16 [Source:HGNC Symbol;Acc:HGNC:20714]	protein_coding;processed_transcript	NA	NA	2.00952	1.69803	2.38524	2.26501	2.64196	3.35742	3.03967	3.03241	3.99168	4.58687	4.11671	3.50987	3.83185	4.43917	0.792092	1.11647	1.41226	1.01468	1.60011	0.643045	0.80921	0.942945	1.00829	0.325924	1.16618	0.930814	1.25141	1.15519	3.16936	1.66419	1.90057e-27	2.27943e-25	up	yes
ENSG00000204444	APOM	55937	ENST00000375918;ENST00000375920;ENST00000375916	GO:0005319(lipid transporter activity);GO:0005543(phospholipid binding);GO:0005576(extracellular region);GO:0006869(lipid transport);GO:0016209(antioxidant activity);GO:0033344(cholesterol efflux);GO:0034361(very-low-density lipoprotein particle);GO:0034362(low-density lipoprotein particle);GO:0034364(high-density lipoprotein particle);GO:0034365(discoidal high-density lipoprotein particle);GO:00…	NA	NA	NA	NA	apolipoprotein M [Source:HGNC Symbol;Acc:HGNC:13916]	protein_coding	DOID:0014667(disease_of_metabolism);DOID:0050013(carbohydrate_metabolism_disease);DOID:0050686(organ_system_cancer);DOID:0050828(artery_disease);DOID:0060158(acquired_metabolic_disease);DOID:10652(Alzheimer's_disease);DOID:1287(cardiovascular_system_disease);DOID:1289(neurodegenerative_disease);DOID:1307(dementia);DOID:14566(disease_of_cellular_proliferation);DOID:150(disease_of_mental_health);DO…	R-HSA-5246478(APOM binds retinoids)	0.0973332	0.290564	0.651819	0.193425	0.24844	0.654818	0.491034	0.721231	0.731055	0.493727	0.72437	0.325951	0.649467	0.818575	1.66383	0.914838	1.61726	2.10043	1.59961	0.990337	1.59789	1.18919	1.67941	0.65909	1.42687	1.51986	1.25577	1.51985	0.359366	-1.47647	1.95417e-27	2.33023e-25	down	yes
ENSG00000108953	YWHAE	7531	ENST00000264335;ENST00000571732;ENST00000486241;ENST00000576854;ENST00000575977;ENST00000469398;ENST00000496706;ENST00000466227;ENST00000573196;ENST00000489287;ENST00000498643;ENST00000573026	GO:0000165(MAPK cascade);GO:0001764(neuron migration);GO:0003064(regulation of heart rate by hormone);GO:0003723(RNA binding);GO:0005246(calcium channel regulator activity);GO:0005515(protein binding);GO:0005634(nucleus);GO:0005737(cytoplasm);GO:0005829(cytosol);GO:0005886(plasma membrane);GO:0005925(focal adhesion);GO:0006605(protein targeting);GO:0007165(signal transduction);GO:0007346(regulati…	04110(Cell cycle);04114(Oocyte meiosis);04151(PI3K-Akt signaling pathway);04390(Hippo signaling pathway);04621(NOD-like receptor signaling pathway);04722(Neurotrophin signaling pathway);05160(Hepatitis C);05203(Viral carcinogenesis);05203(Viral carcinogenesis)	NA	NA	NA	tyrosine 3-monooxygenase/tryptophan 5-monooxygenase activation protein epsilon [Source:HGNC Symbol;Acc:HGNC:12851]	protein_coding;retained_intron;nonsense_mediated_decay;processed_transcript	DOID:0050686(organ_system_cancer);DOID:14566(disease_of_cellular_proliferation);DOID:150(disease_of_mental_health);DOID:1561(cognitive_disorder);DOID:162(cancer);DOID:2468(psychotic_disorder);DOID:3093(nervous_system_cancer);DOID:3565(meningioma);DOID:3620(central_nervous_system_cancer);DOID:4(disease);DOID:5419(schizophrenia)	R-HSA-139899(Sequestration of BAD protein by 14-3-3);R-HSA-139906(Activation of BAD by calcineurin);R-HSA-1445149(14-3-3 binds p-5S,T642-AS160 (TBC1D4));R-HSA-1454689(14-3-3 Binds p-S237-TBC1D1);R-HSA-2028651(YWHAE (14-3-3 epsilon) dimer binds phosphorylated WWTR1 (TAZ));R-HSA-204981(14-3-3epsilon attentuates NADE-related apoptosis);R-HSA-2574840(AJUBA facilitates AURKA autophosphorylation);R-HSA…	12.8115	13.6239	18.3339	18.7255	22.625	20.8054	15.7096	23.9132	31.2537	32.3574	20.9848	26.9314	40.0699	37.8296	8.5658	5.43218	10.7669	9.04964	10.0644	6.52913	8.14451	3.15087	8.49051	3.38643	8.59665	8.48514	9.15661	10.9455	3.03324	1.60086	1.95452e-27	2.33023e-25	up	yes
[truncated: 39,841 more rows]
